# Supplementary material for: Unusual Inner-Salt Guaiazulene Alkaloids and bis-Sesquiterpene from the South China Sea Gorgonian Muriceides collaris
Source: PubMed Central journal article supplement (PMC5550455; doi:10.1038/s41598-017-08100-z), 2017-08-09
Supplement: 41598_2017_8100_MOESM1_ESM.pdf [file 41598_2017_8100_MOESM1_ESM.pdf]

# Supporting Information

## Unusual Inner-Salt Guaiazulene Alkaloids and *bis*-Sesquiterpene from the South China Sea Gorgonian *Muriceides collaris*

Pinglin Li<sup>1,2,†</sup>, Xiaoling Liu<sup>1,2,†</sup>, Hongyan Zhu<sup>1,2,†</sup>, Xuli Tang<sup>3</sup>, Xuefeng Shi<sup>1,2</sup>, Yonghong Liu<sup>4</sup>, and Guoqiang Li<sup>1,2</sup>

<sup>1</sup> Key Laboratory of Marine Drugs, Chinese Ministry of Education, School of Medicine and Pharmacy, Ocean University of China, Qingdao 266003, China.

<sup>2</sup> Laboratory of Marine Drugs and Biological Products, National Laboratory for Marine Science and Technology, Qingdao 266235, P. R. China.

<sup>3</sup> College of Chemistry and Chemical Engineering, Ocean University of China, Qingdao 266100, China.

<sup>4</sup> CAS Key Laboratory of Tropical Marine Bio-resources and Ecology, Guang dong Key Laboratory of Marine Materia Medica, Research Center for Marine Microbes, South China Sea Institute of Oceanology, Chinese Academy of Sciences, Guangzhou 510301, China.

## Table of contents

|                                                                                                      |            |
|------------------------------------------------------------------------------------------------------|------------|
| <b>Experimental Section</b>                                                                          | <b>S3</b>  |
| 1. Chiral HPLC purification of compounds <b>2-4</b>                                                  | <b>S3</b>  |
| 2. 1D NMR Data of compounds <b>5</b> and <b>6</b>                                                    | <b>S3</b>  |
| 3. Semisynthesis of muriceidine A ( <b>1</b> )                                                       | <b>S4</b>  |
| <b>Computational details</b>                                                                         | <b>S7</b>  |
| 1. <sup>13</sup> C NMR calculation for <b>1</b> to distinguish inner-salt and non-ionized structures | <b>S7</b>  |
| 2. ECD calculations for <b>2</b> to determine the absolute configurations                            | <b>S13</b> |
| 3. ECD and OR calculations for <b>4</b> to determine the absolute configurations.                    | <b>S17</b> |
| <b>1D and 2D NMR spectra of the new compounds (1–4)</b>                                              | <b>S28</b> |
| SS1 The positive ESIMS spectrum of muriceidine A ( <b>1</b> )                                        | <b>S28</b> |
| SS2 The positive HRESIMS spectrum of muriceidine A ( <b>1</b> )                                      | <b>S29</b> |
| SS3 <sup>1</sup> H NMR (600 MHz, CDCl <sub>3</sub> ) spectrum of muriceidine A ( <b>1</b> )          | <b>S30</b> |
| SS4 The amplificatory <sup>1</sup> H NMR spectrum of muriceidine A ( <b>1</b> )                      | <b>S31</b> |
| SS5 <sup>13</sup> C NMR (150 MHz, CDCl <sub>3</sub> ) spectrum of muriceidine A ( <b>1</b> )         | <b>S32</b> |
| SS6 DEPT spectrum of muriceidine A ( <b>1</b> )                                                      | <b>S33</b> |
| SS7 <sup>1</sup> H- <sup>1</sup> H COSY spectrum of muriceidine A ( <b>1</b> )                       | <b>S34</b> |
| SS8 HMQC spectrum of muriceidine A ( <b>1</b> )                                                      | <b>S35</b> |
| SS9 HMBC spectrum of muriceidine A ( <b>1</b> )                                                      | <b>S36</b> |
| SS10 The key amplificatory HMBC spectrum of muriceidine A ( <b>1</b> )                               | <b>S37</b> |
| SS11 NOESY spectrum of muriceidine A ( <b>1</b> )                                                    | <b>S38</b> |
| SS12 The positive ESIMS spectrum of muriceidine B ( <b>2</b> )                                       | <b>S39</b> |
| SS13 The positive HRESIMS spectrum of muriceidine B ( <b>2</b> )                                     | <b>S40</b> |
| SS14 <sup>1</sup> H NMR (600 MHz, MeOD) spectrum of muriceidine B ( <b>2</b> )                       | <b>S41</b> |
| SS15 The amplificatory <sup>1</sup> H NMR spectrum of muriceidine B ( <b>2</b> )                     | <b>S42</b> |
| SS16 <sup>13</sup> C NMR (150 MHz, MeOD) spectrum of muriceidine B ( <b>2</b> )                      | <b>S43</b> |
| SS17 DEPT spectrum of muriceidine B ( <b>2</b> )                                                     | <b>S44</b> |
| SS18 <sup>1</sup> H- <sup>1</sup> H COSY spectrum of muriceidine B ( <b>2</b> )                      | <b>S45</b> |
| SS19 HMQC spectrum of muriceidine B ( <b>2</b> )                                                     | <b>S46</b> |
| SS20 HMBC spectrum of muriceidine B ( <b>2</b> )                                                     | <b>S47</b> |
| SS21 The key amplificatory HMBC spectrum of muriceidine B ( <b>2</b> )                               | <b>S48</b> |
| SS22 NOESY spectrum of muriceidine B ( <b>2</b> )                                                    | <b>S49</b> |
| SS23 The positive ESIMS spectrum of muriceidine C ( <b>3</b> )                                       | <b>S50</b> |
| SS24 The positive HRESIMS spectrum of muriceidine C ( <b>3</b> )                                     | <b>S51</b> |
| SS25 <sup>1</sup> H NMR (600 MHz, CDCl <sub>3</sub> ) spectrum of muriceidine C ( <b>3</b> )         | <b>S52</b> |
| SS26 The amplificatory <sup>1</sup> H NMR spectrum of muriceidine C ( <b>3</b> )                     | <b>S53</b> |
| SS27 <sup>13</sup> C NMR (150 MHz, CDCl <sub>3</sub> ) spectrum of muriceidine C ( <b>3</b> )        | <b>S54</b> |
| SS28 DEPT spectrum of muriceidine C ( <b>3</b> )                                                     | <b>S55</b> |
| SS29 <sup>1</sup> H- <sup>1</sup> H COSY spectrum of muriceidine C ( <b>3</b> )                      | <b>S56</b> |
| SS30 HMQC spectrum of muriceidine C ( <b>3</b> )                                                     | <b>S57</b> |
| SS31 HMBC spectrum of muriceidine C ( <b>3</b> )                                                     | <b>S58</b> |
| SS32 NOESY spectrum of muriceidine C ( <b>3</b> )                                                    | <b>S59</b> |
| SS33 The positive ESIMS spectrum of muriceidone A ( <b>4</b> )                                       | <b>S60</b> |
| SS34 The positive HRESIMS spectrum of muriceidone A ( <b>4</b> )                                     | <b>S61</b> |
| SS35 <sup>1</sup> H NMR (600 MHz, CDCl <sub>3</sub> ) spectrum of muriceidone A ( <b>4</b> )         | <b>S62</b> |
| SS36 The amplificatory <sup>1</sup> H NMR spectrum of muriceidone A ( <b>4</b> )                     | <b>S63</b> |
| SS37 <sup>13</sup> C NMR (150 MHz, CDCl <sub>3</sub> ) spectrum of muriceidone A ( <b>4</b> )        | <b>S64</b> |
| SS38 The amplificatory <sup>13</sup> C NMR spectrum of muriceidone A ( <b>4</b> )                    | <b>S65</b> |
| SS39 DEPT spectrum of muriceidone A ( <b>4</b> )                                                     | <b>S66</b> |
| SS40 HMQC spectrum of muriceidone A ( <b>4</b> )                                                     | <b>S67</b> |
| SS41 HMBC spectrum of muriceidone A ( <b>4</b> )                                                     | <b>S68</b> |
| SS42 The key amplificatory HMBC spectrum of muriceidone A ( <b>4</b> )                               | <b>S69</b> |
| SS43 NOESY spectrum of muriceidone A ( <b>4</b> )                                                    | <b>S70</b> |
| SS44 The amplificatory NOESY spectrum of muriceidone A ( <b>4</b> )                                  | <b>S71</b> |

## Experimental Section

### 1. Chiral HPLC purification of compounds 2–4:

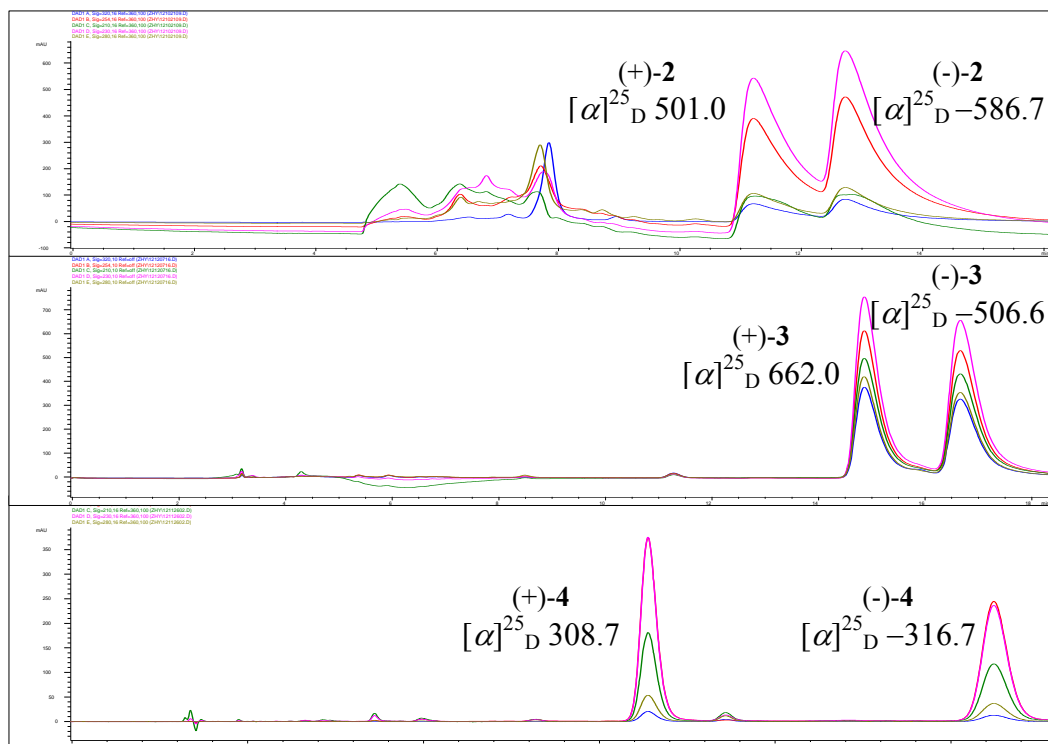

Figure S1. Chiral HPLC separations of compounds 2–4.

### 2. 1D NMR Data of the compounds 5, 6 and synthetic muriceidine A:

**Guaiazulene (GA, 5):** Azure amorphous powder; ESI-MS  $m/z$  199.1  $[M+H]^+$ ;  $^1H$  NMR ( $CDCl_3$ , 600 MHz)  $\delta_H$ : 8.20 (1H, s, H-4), 7.62 (1H, d,  $J = 3.7$  Hz, H-1), 7.41 (1H, d,  $J = 10.3$  Hz, H-6), 7.22 (1H, d,  $J = 3.3$  Hz, H-2), 7.01 (1H, d,  $J = 10.6$  Hz, H-7), 3.08 (1H, m, H-11), 2.83 (3H, s), 2.67 (3H, s, H-14), 1.36 (6H, d,  $J = 7.0$  Hz, H-12/13);  $^{13}C$  NMR ( $CDCl_3$ , 150 MHz)  $\delta_C$ : 144.3 (s, C-8), 139.9 (s, C-5), 137.2 (s, C-9), 136.2 (s, C-10), 136.1 (d, C-1), 134.9 (d, C-6), 133.3 (d, C-4), 125.2 (s, C-3), 125.0 (d, C-7), 112.7 (d, C-2), 38.3 (d, C-11), 24.8 (q, C-12/13), 24.1 (q, C-15), 12.9 (q, C-14).

**3-formylguaiazulene (6):** Purple amorphous powder;  $^1H$  NMR ( $CDCl_3$ , 600 MHz):  $\delta_H$  10.64 (1H, s, CHO), 8.29 (1H, d,  $J = 2.2$  Hz, H-8), 8.23 (1H, s, H-2), 7.60 (1H, dd,  $J = 11.0, 2.2$  Hz, H-6), 7.43 (1H, d,  $J = 11.0$  Hz, H-5), 3.17 (1H, dq,  $J = 7.1, 7.1$  Hz, H-11), 2.59 (3H, s, H-15), 2.27 (3H, s, H-14), 1.39 (6H, d,  $J = 7.1$  Hz, H-12/13).

**Synthetic muriceidine A:**  $^1H$  NMR ( $CDCl_3$ , 600 MHz):  $\delta_H$  1.36 (6H, d,  $J = 6.86$  Hz), 1.98 (2H, br s), 2.56 (3H, s), 2.87 (2H, br s), 3.07 (1H, m), 3.14 (3H, s), 3.70 (2H, br s), 7.31 (1H, d,  $J = 10.67$  Hz), 7.49 (1H, d,  $J = 10.72$  Hz), 7.76 (1H, s), 8.14 (1H, s), 9.56 (1H, br s).  $^{13}C$  NMR ( $CDCl_3$ , 150 MHz):  $\delta_C$  13.3, 20.3, 24.5, 29.7, 38.1, 42.8, 117.9, 123.6, 128.3, 133.7, 134.7, 137.2, 139.1, 141.2, 143.0, 147.0, 149.4, 149.5, 164.0, 171.4.

### 3. Semisynthesis of muriceidine A (1):

Et<sub>2</sub>O and DMF were purified by distillation. <sup>1</sup>H and <sup>13</sup>C NMR spectra were recorded on a JEOL JNM-ECP 500 spectrometer (JEOL Ltd., Tokyo, Japan), using CDCl<sub>3</sub> or CD<sub>3</sub>OD as the solvent. HRESIMS spectra were acquired using a Micromass Q-TOF Ultima Global GAA076 LC mass spectrometer (Thermo Fisher Scientific Inc., Waltham, MA, USA). All reactions were routinely followed by thin-layer chromatography on commercial TLC precoated silica gel plates (GF254, Qingdao Haiyang Chemical Co. Ltd., Qingdao, China). Silica gel (300 – 400 mesh, Qingdao Haiyang Chemical Co. Ltd., Qingdao, China) and ODS silica gel (50 μm, Merck, Darmstadt, Germany) were used for column chromatography (CC). The analysis of intermediates and products were performed on an Agilent 1100 series instrument with DAD detector (Agilent Technologies, Palo Alto, CA, USA), equipped with a semi-preparative ODS column (YMC-Pack ODS-A, 5μm, 250 × 10 mm). UV spectra were measured on a Beckman DU640 spectrophotometer (Beckman Coulter Inc., Brea, CA, USA). All the solvents were evaporated under reduced pressure using a rotary evaporator.

#### Synthetic route:

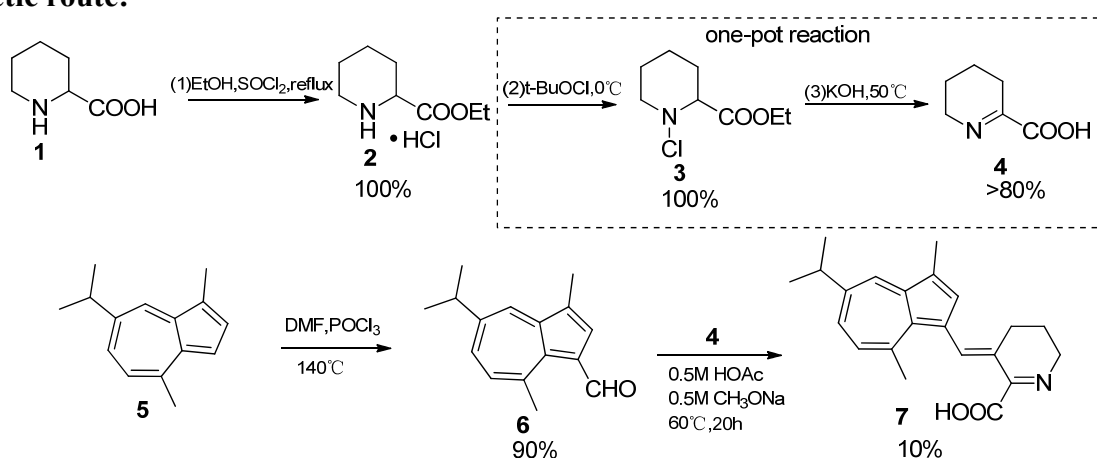

#### Synthesis of compound 2.

L-pipecolic acid (1.3g, 100mmol) was dissolved in 40 mL of anhydrous ethanol, and SOCl<sub>2</sub> (7.3mL, 100mmol) was added dropwise at 0°C. Then the mixture was refluxed for 4 h under stirring. After the reaction had ceased, the solvent was removed in vacuo. The residue was resolved in 5 mL of MeOH, adding NaHCO<sub>3</sub> gradually until neutral pH. The mixture was filtered and concentrated at reduced pressure to yield compound 2 as a white solid (1.6 g, 100%). <sup>1</sup>H-NMR (500 MHz, CD<sub>3</sub>OD) δ 4.20-4.24 (q, 7.1Hz, 2H), 4.00 (dd, J = 11.5、3.4 Hz, 1H), 3.37 (dt, J = 12.6 Hz, 1H), 3.27 (m, 1H), 3.03 (td, J = 12.3、3.3 Hz, 1H), 2.27-2.22 (m, 1H), 1.91 -1.80 (m, 2H), 1.76-1.59 (m, 3H), 1.29 (t, J = 7.1 Hz, 3H). <sup>13</sup>C-NMR (126 MHz, CD<sub>3</sub>OD) δ 169.74, 63.56, 57.78, 48.86, 45.10, 27.06, 22.85, 22.69, 14.21.

#### Synthesis of compound 3 and 4

t-Butyl hypochlorite: (Caution! This procedure should be conducted in dim light and exposure to the hypochlorite should be avoided. The product should not be exposed to direct sun light or rubber. Do not heat the product over its boiling point (77-78 °C at 760 mm Hg). In a 25 mL round-bottom flask a mixture of t-BuOH (2 mL, 20.9 mmol), aqueous NaOCl solution (active chlorine ≥5% , 12mL, 18.6mmol), and acetic acid (2 mL, 34.3 mmol) was added in order and stirred at 0 °C for 5 minutes. The desired product was isolated from the lower aqueous phase as a yellow liquid. The organic fraction was directly used as chlorine source in the next step without further purification.

N-Chloropipecic acid ester: Compound 2 (400 mg, 2.1 mmol) was dissolved with 15 mL of anhydrous ether in a 50 mL flask, and the solution was added the freshly prepared t-BuOCl dropwise at 0°C under N<sub>2</sub> atmosphere. Then the mixture was stirred at 0°C for 3h. TLC tracking monitoring

and ninhydrin colorimetry method were used till the reactant is fully converted. The N-chloropiperic acid ester was quite unstable and sensitive to light. So after the reaction had ceased, excessive solid KOH (500mg, 8.9 mmol) was added in one batch, followed by 10 mL dry MeOH. The mixture was heated in an oil bath at 50°C for 1h and then kept at room temperature overnight. The mixture was concentrated by rotary evaporation at 20°C to remove the ether and get the methanol solution of compound **4** ( $\Delta^1$ -pipercolic acid). The white solid was removed by filtration, and this crude material was used in the next step without further purification. TLC proved that compound **4** existed as a near equimolar tautomeric mixture of enamine and imine. It was sensitive to the air and couldn't be kept without solvents.

#### Synthesis of compound **6**

POCl<sub>3</sub> was added dropwise to stirred, cold DMF. The mixture was stirred at 0°C for 0.5 h. Then a solution of commercially available guaiazulene (7-isopropyl-1,4-dimethylazulene) (**5**) (1.0 g, 504 mmol) in DMF (10 mL) was added. The mixture was stirred at 0 °C for 1 h and then kept at room temperature overnight. After the reaction, the solution was poured into 50mL ice water, carefully neutralized with aq NaOH and then the resulting product was extracted with dichloromethane (50mL×3). The extract was washed with distilled water and evaporated in vacuo. The residue thus obtained was carefully separated by silica gel column chromatography with petroleum ether/acetone (5:1, vol/vol). The product was purified as a purple solid (108 mg, 477 mmol, 90% yield). <sup>1</sup>H-NMR (500 MHz, CDCl<sub>3</sub>) δ 10.67 (s, 1H), 8.33 (d, J = 1.5 Hz, 1H), 8.26 (s, 1H), 7.62 (d, J = 10.8 Hz, 1H), 7.46 (d, J = 10.8 Hz, 1H), 3.22-3.16 (m, 1H), 3.18(s,3H), 2.62 (s, 3H), 1.43 (d, J = 6.9 Hz, 6H).

#### Synthesis of compound **7**

CH<sub>3</sub>ONa (93 mg, 0.29 mmol) was dissolved in methanol (5 mL) in a 100mL flask. And then the methanol solution of compound **4** was added. The solution was stirred at room temperature for a while and then added 2mL methanol solution of compound **6** (mg, mmol) containing acetic acid (72 μL, 1.2 mmol), and the mixture was added to the flask dropwise. Then the reaction was heated to 60 °C and stirred for 20h. After cooling, the solution was evaporated to remove the methanol. The residue was dissolved with distilled water and EtOAc. The EtOAc layer was separated from the water phase. The lower solution was extracted three times with EtOAc. The organic layers were combined and concentrated by evaporation. The crude product was purified with column chromatography (eluent: CH<sub>2</sub>Cl<sub>2</sub>/CH<sub>3</sub>OH 15:1) to obtain a red solid (20mg, 10%). MS:[M+H]<sup>+</sup>=336. <sup>1</sup>H-NMR (500 MHz, CDCl<sub>3</sub>) δ 9.57 (s, 1H), 8.15 (s, 1H), 7.77 (s, 1H), 7.50 (d, J = 10.7 Hz, 1H), 7.32 (d, J = 10.7 Hz, 1H), 3.71 (s, 2H), 3.15 (s, 3H), 3.10 (m, 1H), 2.88 (s, 2H), 2.57 (s, 3H), 1.99 (s, 2H), 1.37 (d, J = 6.9 Hz, 6H). <sup>13</sup>C-NMR (126 MHz, CD<sub>3</sub>OD) δ 170.93, 164.48, 149.25, 148.71, 146.76, 145.62, 142.79, 141.01, 138.85, 136.91, 134.48, 133.45, 128.06, 123.32, 117.63, 77.15, 76.90, 76.65, 42.58, 37.89, 29.47, 24.40, 24.30, 20.06, 13.06.

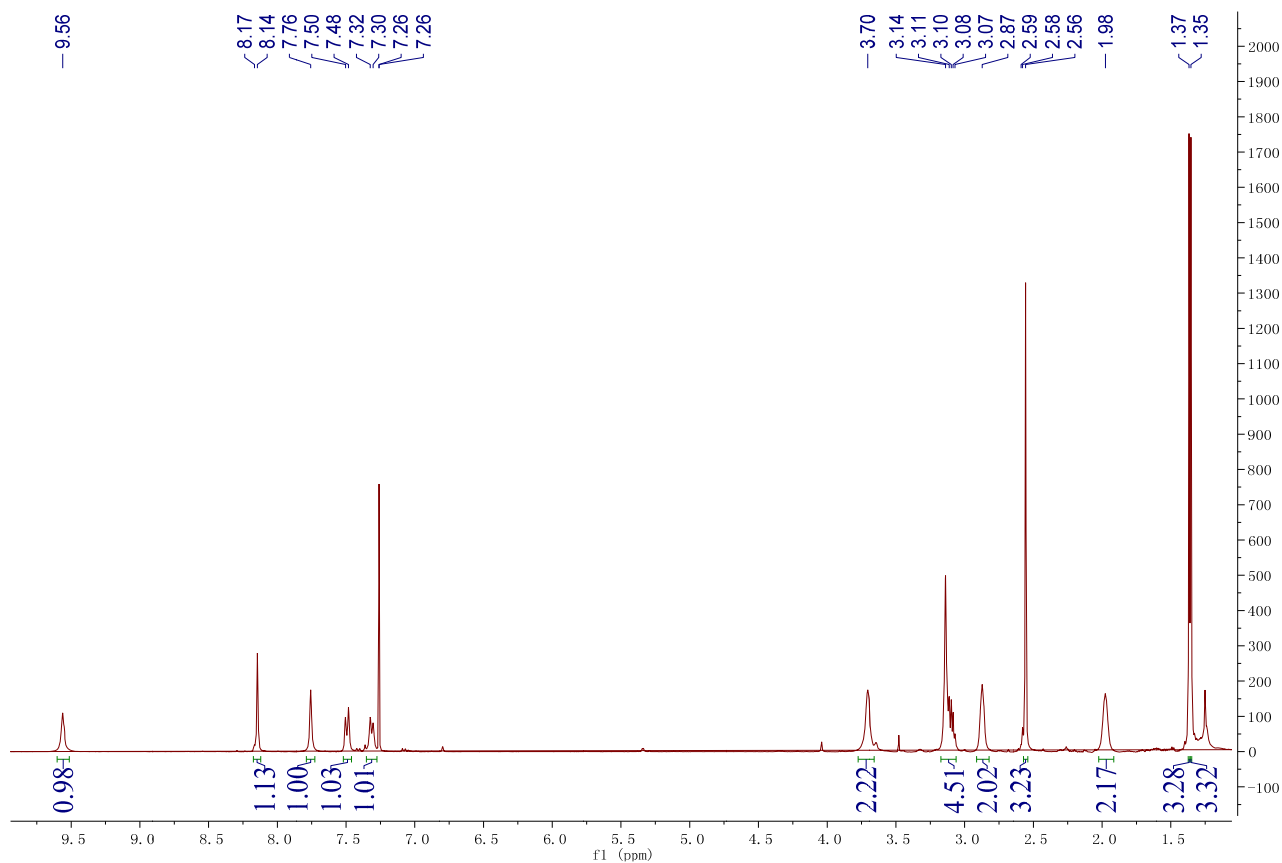

Figure C1  $^1\text{H}$  NMR (600 MHz,  $\text{CDCl}_3$ ) spectrum of synthetic muriceidine A (**1**)

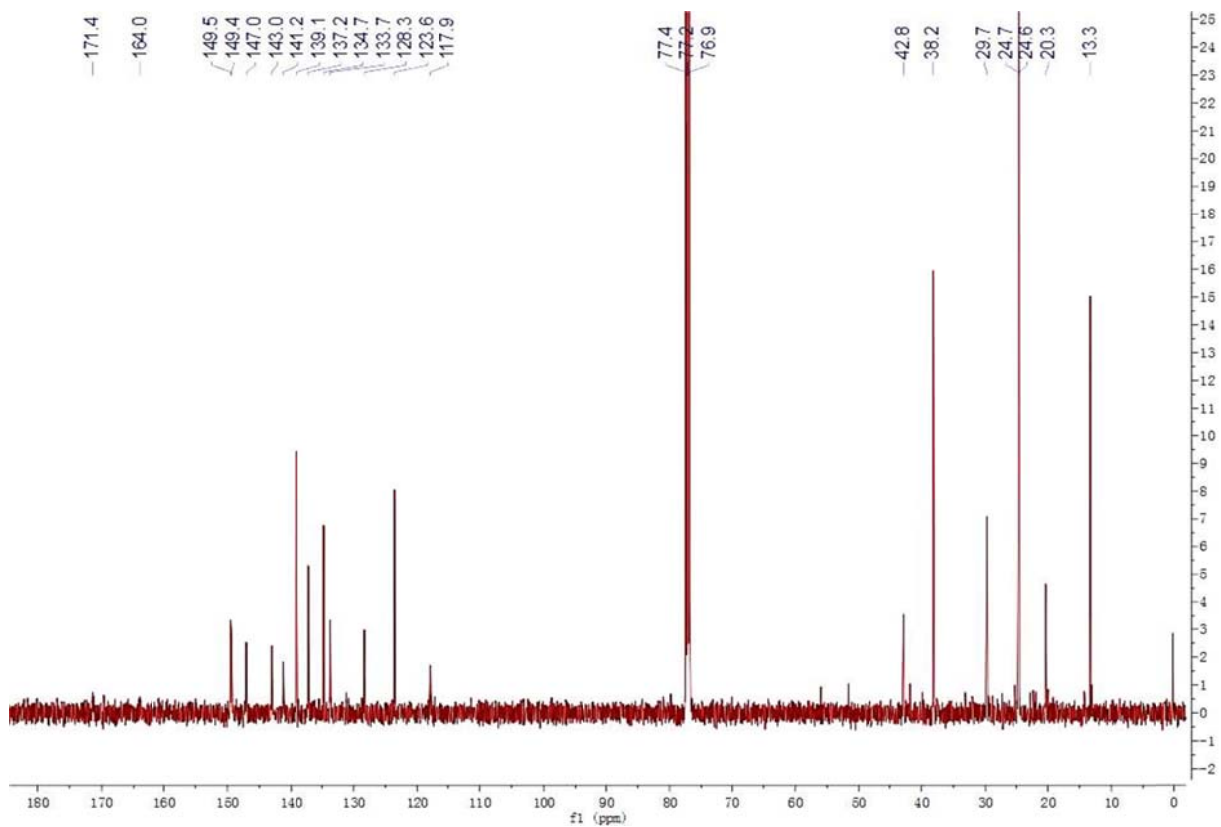

Figure C2  $^{13}\text{C}$  NMR (150 MHz,  $\text{CDCl}_3$ ) spectrum of synthetic muriceidine A (**1**)

## Computational details

### 1. $^{13}\text{C}$ NMR calculation for **1** to distinguish inner-salt and non-ionized structures

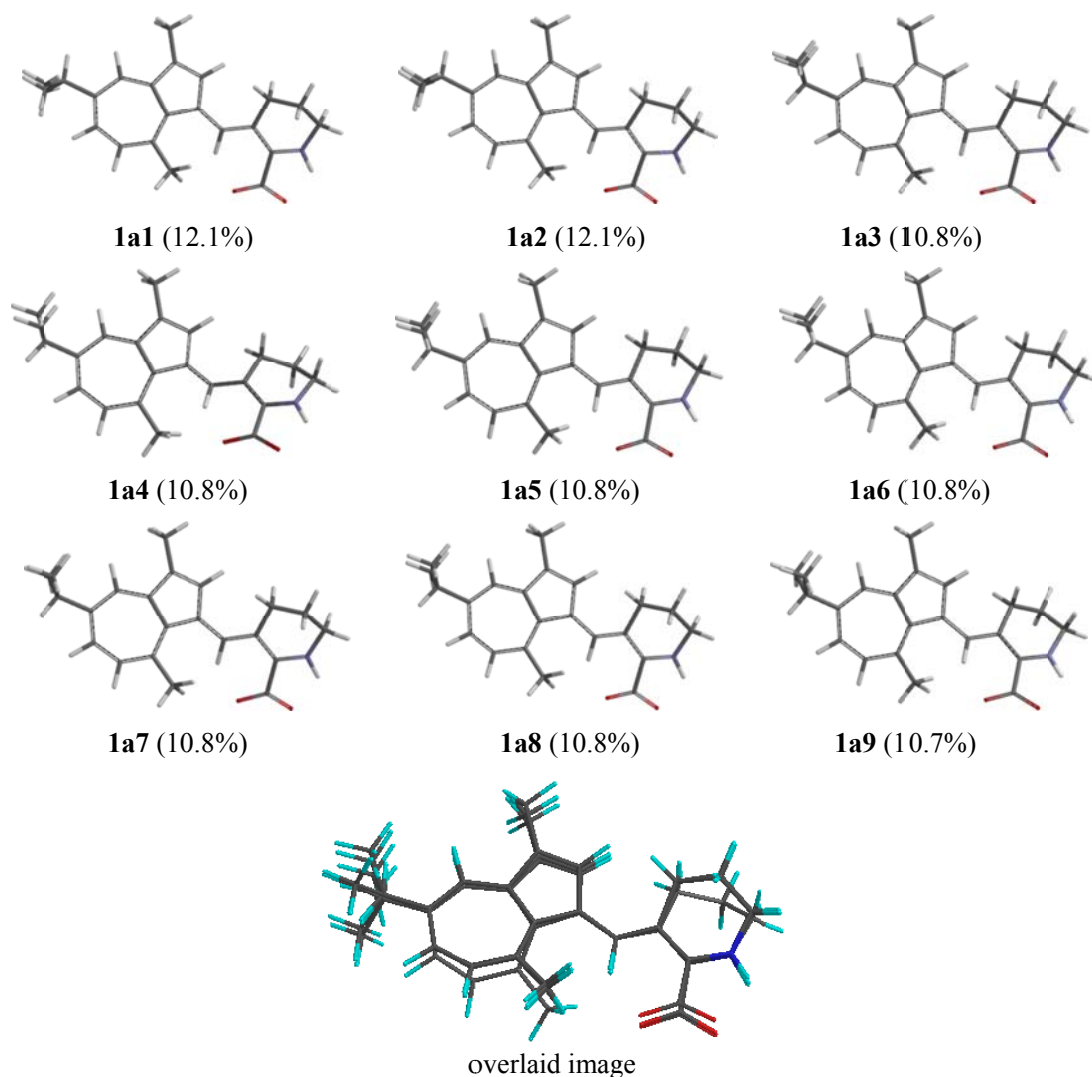

**Figure S2** Stable conformers of compound **1** with inner salt structure.

**Table S1.** Important thermodynamic parameters (a.u.) of the optimized compound **1** with inner salt structure at B3LYP/DGDZVP level in the gas phase

| conformations | E+ZPE        | G            |
|---------------|--------------|--------------|
| <b>1a1</b>    | -1058.242494 | -1058.296857 |
| <b>1a2</b>    | -1058.242494 | -1058.296857 |
| <b>1a3</b>    | -1058.242413 | -1058.296750 |
| <b>1a4</b>    | -1058.242413 | -1058.296750 |
| <b>1a5</b>    | -1058.242413 | -1058.296750 |
| <b>1a6</b>    | -1058.242413 | -1058.296750 |
| <b>1a7</b>    | -1058.242413 | -1058.296750 |
| <b>1a8</b>    | -1058.242413 | -1058.296749 |
| <b>1a9</b>    | -1058.242414 | -1058.296745 |

**Table S2.** Optimized Z-Matrixes of compound **1** with inner salt structure in the Gas Phase (Å) at B3LYP/DGDZVP level.

| 1a1 1a2 |          |          |          |   |          | 1a3      |          |   |          |          |          |
|---------|----------|----------|----------|---|----------|----------|----------|---|----------|----------|----------|
| C       | -4.19779 | -0.16623 | 0.001269 | C | -4.19779 | -0.16623 | 0.001263 | C | 4.193099 | -0.5708  | -0.06655 |
| C       | -3.77189 | -1.4723  | 0.294981 | C | -3.77189 | -1.4723  | 0.294982 | C | 3.682058 | -1.84485 | -0.34569 |
| C       | -2.4975  | -1.98884 | 0.5194   | C | -2.4975  | -1.98884 | 0.519414 | C | 2.369775 | -2.28267 | -0.54376 |
| C       | -1.19952 | -1.42288 | 0.468899 | C | -1.19952 | -1.42287 | 0.468918 | C | 1.113733 | -1.63896 | -0.47379 |
| C       | -0.91454 | -0.09059 | 0.10485  | C | -0.91454 | -0.09058 | 0.104865 | C | 0.919551 | -0.28426 | -0.12029 |
| C       | -1.92707 | 0.978709 | -0.1054  | C | -1.92707 | 0.978714 | -0.10538 | C | 2.003122 | 0.718507 | 0.069363 |
| C       | -3.32387 | 0.915425 | -0.14333 | C | -3.32387 | 0.915428 | -0.14333 | C | 3.389525 | 0.567215 | 0.087156 |
| C       | 0.37521  | 0.546635 | -0.02689 | C | 0.375209 | 0.54664  | -0.02687 | C | -0.32138 | 0.435904 | 0.022186 |
| C       | 0.127465 | 1.936683 | -0.26343 | C | 0.127465 | 1.936689 | -0.26341 | C | 0.018814 | 1.810628 | 0.250526 |
| C       | -1.23032 | 2.207749 | -0.31725 | C | -1.23032 | 2.207755 | -0.31723 | C | 1.388827 | 1.993536 | 0.286462 |
| C       | -5.69898 | 0.090969 | -0.14942 | C | -5.69898 | 0.090965 | -0.14944 | C | 5.71079  | -0.41404 | 0.055337 |
| C       | -6.47237 | -0.19172 | 1.154753 | C | -6.47238 | -0.19172 | 1.154724 | C | 6.135873 | 0.063457 | 1.458994 |
| C       | -6.30332 | -0.68698 | -1.3362  | C | -6.3033  | -0.68699 | -1.33623 | C | 6.291697 | 0.498486 | -1.04416 |
| C       | -0.09551 | -2.38928 | 0.858142 | C | -0.09551 | -2.38927 | 0.858173 | C | -0.05796 | -2.53735 | -0.82692 |
| C       | -1.84862 | 3.552679 | -0.5888  | C | -1.84862 | 3.552685 | -0.58878 | C | 2.097594 | 3.295508 | 0.545173 |
| C       | 1.647991 | -0.10399 | -0.08547 | C | 1.647989 | -0.10399 | -0.08546 | C | -1.63637 | -0.12475 | 0.088945 |
| C       | 2.924017 | 0.421793 | 0.024977 | C | 2.924018 | 0.421792 | 0.024978 | C | -2.87209 | 0.489508 | -0.02245 |
| C       | 4.034356 | -0.45999 | -0.20209 | C | 4.034352 | -0.46    | -0.20209 | C | -4.04174 | -0.3096  | 0.214334 |
| N       | 5.274586 | -0.01063 | -0.14338 | N | 5.274584 | -0.01064 | -0.1434  | N | -5.24728 | 0.224889 | 0.150912 |
| C       | 5.691507 | 1.346953 | 0.195013 | C | 5.691512 | 1.346946 | 0.194987 | C | -5.56888 | 1.604101 | -0.20386 |
| C       | 4.614625 | 2.011728 | 1.049112 | C | 4.614639 | 2.011725 | 1.049094 | C | -4.44789 | 2.182599 | -1.06405 |
| C       | 3.238582 | 1.86896  | 0.38176  | C | 3.23859  | 1.86896  | 0.381756 | C | -3.08573 | 1.951884 | -0.39253 |
| C       | 4.041629 | -2.03255 | -0.54249 | C | 4.04162  | -2.03256 | -0.54249 | C | -4.15935 | -1.87375 | 0.573023 |
| O       | 5.207897 | -2.45429 | -0.7266  | O | 2.941795 | -2.61993 | -0.56689 | O | -5.35182 | -2.20875 | 0.767361 |
| O       | 2.941805 | -2.61993 | -0.56689 | O | 5.207886 | -2.4543  | -0.72661 | O | -3.10416 | -2.53771 | 0.598626 |
| H       | -4.56479 | -2.21198 | 0.394348 | H | -4.56478 | -2.21198 | 0.394344 | H | 4.428637 | -2.6312  | -0.45463 |
| H       | -2.50285 | -3.04336 | 0.786422 | H | -2.50285 | -3.04335 | 0.786441 | H | 2.307509 | -3.33713 | -0.80349 |
| H       | -3.80603 | 1.87273  | -0.33693 | H | -3.80603 | 1.872731 | -0.33693 | H | 3.930457 | 1.494116 | 0.268218 |
| H       | 0.895011 | 2.677253 | -0.45164 | H | 0.895011 | 2.67726  | -0.45162 | H | -0.69781 | 2.598878 | 0.445013 |
| H       | -5.82003 | 1.158057 | -0.36983 | H | -5.82003 | 1.158052 | -0.36986 | H | 6.14641  | -1.40918 | -0.09081 |
| H       | -6.0648  | 0.384102 | 1.992233 | H | -6.06482 | 0.384102 | 1.992206 | H | 5.749229 | -0.60022 | 2.23927  |
| H       | -6.43319 | -1.25221 | 1.427533 | H | -6.4332  | -1.25221 | 1.427507 | H | 5.773002 | 1.075483 | 1.670273 |
| H       | -7.52773 | 0.078737 | 1.037649 | H | -7.52774 | 0.07873  | 1.037608 | H | 7.22849  | 0.082627 | 1.539296 |
| H       | -5.77443 | -0.46459 | -2.26875 | H | -6.25826 | -1.77004 | -1.17644 | H | 5.931531 | 1.528986 | -0.94802 |
| H       | -6.25828 | -1.77003 | -1.17641 | H | -5.77441 | -0.4646  | -2.26877 | H | 6.019713 | 0.141072 | -2.04279 |
| H       | -7.35707 | -0.41803 | -1.46999 | H | -7.35706 | -0.41804 | -1.47003 | H | 7.385164 | 0.524996 | -0.97851 |
| H       | -0.51385 | -3.25651 | 1.373896 | H | 0.636124 | -1.92492 | 1.522413 | H | -0.76127 | -2.04233 | -1.49996 |
| H       | 0.636126 | -1.92494 | 1.522386 | H | 0.461422 | -2.76338 | -0.00657 | H | -0.63204 | -2.84646 | 0.051857 |
| H       | 0.461423 | -2.76338 | -0.00661 | H | -0.51385 | -3.25649 | 1.373936 | H | 0.294366 | -3.44615 | -1.31967 |
| H       | -1.07193 | 4.312801 | -0.71238 | H | -2.4536  | 3.552175 | -1.50388 | H | 2.717985 | 3.255966 | 1.449046 |
| H       | -2.49902 | 3.880963 | 0.231283 | H | -1.07193 | 4.312828 | -0.71225 | H | 1.373857 | 4.103968 | 0.682407 |
| H       | -2.4537  | 3.552144 | -1.50383 | H | -2.49912 | 3.880921 | 0.231245 | H | 2.752328 | 3.581661 | -0.28724 |
| H       | 1.658374 | -1.16777 | -0.28324 | H | 1.658367 | -1.16777 | -0.28323 | H | -1.7215  | -1.1838  | 0.293486 |
| H       | 5.940616 | -0.77247 | -0.35711 | H | 5.940608 | -0.77249 | -0.35713 | H | -5.96463 | -0.48568 | 0.375551 |
| H       | 5.864045 | 1.913701 | -0.73011 | H | 5.864043 | 1.913691 | -0.73014 | H | -6.52598 | 1.604917 | -0.73449 |



|                |          |          |          |   |          |          |          |            |          |          |          |
|----------------|----------|----------|----------|---|----------|----------|----------|------------|----------|----------|----------|
| H              | 6.646998 | 1.287604 | 0.7252   | H | 6.647007 | 1.287595 | 0.725166 | H          | -5.70198 | 2.192387 | 0.71426  |
| H              | 4.862364 | 3.067499 | 1.199187 | H | 4.597402 | 1.535539 | 2.036207 | H          | -4.62138 | 3.251353 | -1.22595 |
| H              | 4.597381 | 1.535539 | 2.036223 | H | 4.862382 | 3.067496 | 1.199165 | H          | -4.46294 | 1.695517 | -2.04586 |
| H              | 2.470301 | 2.25656  | 1.057271 | H | 2.470315 | 2.256562 | 1.057274 | H          | -3.01716 | 2.585727 | 0.503324 |
| H              | 3.210798 | 2.498066 | -0.51965 | H | 3.210798 | 2.498064 | -0.51965 | H          | -2.29176 | 2.280078 | -1.06964 |
| <b>1a4 1a5</b> |          |          |          |   |          |          |          | <b>1a6</b> |          |          |          |
| C              | -4.1931  | -0.5708  | -0.06655 | C | -4.1931  | -0.5708  | -0.06655 | C          | 4.193095 | -0.5708  | -0.06654 |
| C              | -3.68205 | -1.84485 | -0.34569 | C | -3.68206 | -1.84485 | -0.34569 | C          | 3.682051 | -1.84485 | -0.34568 |
| C              | -2.36977 | -2.28266 | -0.54376 | C | -2.36977 | -2.28266 | -0.54377 | C          | 2.369769 | -2.28266 | -0.54377 |
| C              | -1.11373 | -1.63895 | -0.4738  | C | -1.11373 | -1.63895 | -0.4738  | C          | 1.113731 | -1.63894 | -0.47382 |
| C              | -0.91955 | -0.28425 | -0.1203  | C | -0.91955 | -0.28425 | -0.1203  | C          | 0.919551 | -0.28425 | -0.12032 |
| C              | -2.00312 | 0.71851  | 0.069355 | C | -2.00312 | 0.718514 | 0.069348 | C          | 2.003124 | 0.71852  | 0.069332 |
| C              | -3.38952 | 0.567216 | 0.087155 | C | -3.38953 | 0.567218 | 0.08715  | C          | 3.389526 | 0.56722  | 0.087146 |
| C              | 0.321374 | 0.435908 | 0.02218  | C | 0.321375 | 0.435911 | 0.022171 | C          | -0.32138 | 0.435919 | 0.022152 |
| C              | -0.01882 | 1.810634 | 0.250517 | C | -0.01882 | 1.810637 | 0.250504 | C          | 0.018817 | 1.810646 | 0.250478 |
| C              | -1.38883 | 1.993539 | 0.286449 | C | -1.38883 | 1.993544 | 0.28644  | C          | 1.388829 | 1.993552 | 0.286413 |
| C              | -5.71079 | -0.41404 | 0.055342 | C | -5.71079 | -0.41405 | 0.055357 | C          | 5.710785 | -0.41405 | 0.055382 |
| C              | -6.13587 | 0.063447 | 1.459001 | C | -6.29171 | 0.498474 | -1.04413 | C          | 6.135844 | 0.063449 | 1.459045 |
| C              | -6.29169 | 0.498488 | -1.04414 | C | -6.13586 | 0.063453 | 1.459017 | C          | 6.29172  | 0.498464 | -1.0441  |
| C              | 0.057962 | -2.53734 | -0.82691 | C | 0.057962 | -2.53733 | -0.82694 | C          | -0.05796 | -2.53732 | -0.82697 |
| C              | -2.0976  | 3.295513 | 0.545158 | C | -2.0976  | 3.295517 | 0.54515  | C          | 2.097599 | 3.295525 | 0.54512  |
| C              | 1.636362 | -0.12475 | 0.08895  | C | 1.636363 | -0.12475 | 0.088938 | C          | -1.63636 | -0.12474 | 0.088928 |
| C              | 2.872092 | 0.489513 | -0.02244 | C | 2.872095 | 0.48951  | -0.02245 | C          | -2.8721  | 0.489509 | -0.02245 |
| C              | 4.04173  | -0.30959 | 0.214344 | C | 4.041732 | -0.3096  | 0.214342 | C          | -4.04173 | -0.3096  | 0.21435  |
| N              | 5.247272 | 0.224883 | 0.150926 | N | 5.247274 | 0.22488  | 0.150932 | N          | -5.24727 | 0.224872 | 0.150954 |
| C              | 5.568882 | 1.604094 | -0.20384 | C | 5.568885 | 1.60409  | -0.20383 | C          | -5.56889 | 1.604083 | -0.2038  |
| C              | 4.447898 | 2.182592 | -1.06404 | C | 4.447906 | 2.182594 | -1.06403 | C          | -4.44792 | 2.182591 | -1.06401 |
| C              | 3.085737 | 1.951886 | -0.39252 | C | 3.085741 | 1.951884 | -0.39253 | C          | -3.08575 | 1.951883 | -0.39252 |
| C              | 4.159333 | -1.87375 | 0.573027 | C | 4.159332 | -1.87376 | 0.573027 | C          | -4.15932 | -1.87377 | 0.573029 |
| O              | 5.35181  | -2.20876 | 0.767345 | O | 5.351805 | -2.20876 | 0.767361 | O          | -3.10413 | -2.53772 | 0.598611 |
| O              | 3.104151 | -2.53771 | 0.598608 | O | 3.104146 | -2.53771 | 0.59862  | O          | -5.35179 | -2.20877 | 0.767371 |
| H              | -4.42863 | -2.6312  | -0.45462 | H | -4.42863 | -2.63121 | -0.45461 | H          | 4.428628 | -2.63121 | -0.45459 |
| H              | -2.3075  | -3.33713 | -0.80349 | H | -2.30751 | -3.33713 | -0.8035  | H          | 2.307501 | -3.33712 | -0.8035  |
| H              | -3.93046 | 1.494115 | 0.26822  | H | -3.93046 | 1.494117 | 0.268213 | H          | 3.93046  | 1.494118 | 0.268209 |
| H              | 0.697805 | 2.598886 | 0.445005 | H | 0.69781  | 2.598888 | 0.444984 | H          | -0.69781 | 2.5989   | 0.444951 |
| H              | -6.14641 | -1.40919 | -0.09081 | H | -6.14641 | -1.40919 | -0.09079 | H          | 6.146401 | -1.4092  | -0.09076 |
| H              | -7.22849 | 0.08261  | 1.539303 | H | -6.01973 | 0.141059 | -2.04277 | H          | 5.749179 | -0.60022 | 2.239315 |
| H              | -5.74922 | -0.60023 | 2.239273 | H | -5.93155 | 1.528976 | -0.948   | H          | 5.772975 | 1.075479 | 1.67031  |
| H              | -5.773   | 1.075474 | 1.670283 | H | -7.38518 | 0.524979 | -0.97847 | H          | 7.228459 | 0.082611 | 1.539368 |
| H              | -5.93153 | 1.528988 | -0.948   | H | -5.77299 | 1.075481 | 1.670289 | H          | 5.93156  | 1.528967 | -0.94798 |
| H              | -6.01971 | 0.141081 | -2.04278 | H | -5.74921 | -0.60022 | 2.23929  | H          | 6.019752 | 0.141047 | -2.04274 |
| H              | -7.38516 | 0.524996 | -0.97849 | H | -7.22848 | 0.082619 | 1.539329 | H          | 7.385186 | 0.524966 | -0.97844 |
| H              | 0.76128  | -2.04234 | -1.49996 | H | 0.632045 | -2.84646 | 0.051831 | H          | -0.76127 | -2.04228 | -1.50001 |
| H              | -0.29436 | -3.44616 | -1.31965 | H | 0.761274 | -2.04231 | -1.49998 | H          | -0.63205 | -2.84646 | 0.051788 |
| H              | 0.632031 | -2.84645 | 0.051874 | H | -0.29436 | -3.44614 | -1.3197  | H          | 0.294363 | -3.44611 | -1.31975 |
| H              | -2.75234 | 3.581655 | -0.28724 | H | -2.75237 | 3.581643 | -0.28724 | H          | 2.717909 | 3.256015 | 1.449051 |
| H              | -1.37386 | 4.103974 | 0.682374 | H | -1.37386 | 4.103987 | 0.682331 | H          | 1.373866 | 4.104006 | 0.682248 |

|                |          |          |          |   |          |          |          |            |          |          |          |
|----------------|----------|----------|----------|---|----------|----------|----------|------------|----------|----------|----------|
| H              | -2.71797 | 3.255973 | 1.449041 | H | -2.71795 | 3.25599  | 1.449051 | H          | 2.752413 | 3.581623 | -0.28724 |
| H              | 1.721493 | -1.1838  | 0.293488 | H | 1.72149  | -1.1838  | 0.293481 | H          | -1.72148 | -1.18379 | 0.293472 |
| H              | 5.964619 | -0.4857  | 0.375567 | H | 5.964622 | -0.4857  | 0.375576 | H          | -5.96462 | -0.48571 | 0.3756   |
| H              | 5.701976 | 2.192381 | 0.714274 | H | 5.701974 | 2.192375 | 0.71429  | H          | -5.70197 | 2.192364 | 0.714326 |
| H              | 6.525991 | 1.604905 | -0.73447 | H | 6.525997 | 1.604906 | -0.73445 | H          | -6.52601 | 1.6049   | -0.7344  |
| H              | 4.621392 | 3.251345 | -1.22595 | H | 4.462962 | 1.695511 | -2.04584 | H          | -4.46299 | 1.69551  | -2.04582 |
| H              | 4.462948 | 1.695506 | -2.04585 | H | 4.621404 | 3.251346 | -1.22594 | H          | -4.62143 | 3.251343 | -1.22591 |
| H              | 3.01717  | 2.585733 | 0.503323 | H | 2.291781 | 2.280081 | -1.06965 | H          | -2.2918  | 2.280081 | -1.06966 |
| H              | 2.291775 | 2.280081 | -1.06964 | H | 3.017166 | 2.58573  | 0.503322 | H          | -3.01716 | 2.585729 | 0.503323 |
| <b>1a7 1a8</b> |          |          |          |   |          |          |          | <b>1a9</b> |          |          |          |
| C              | 4.193094 | -0.5708  | -0.06654 | C | -4.19311 | -0.5708  | -0.06657 | C          | -4.19313 | -0.57086 | -0.06677 |
| C              | 3.682051 | -1.84485 | -0.34568 | C | -3.68207 | -1.84485 | -0.34569 | C          | -3.68204 | -1.84484 | -0.34617 |
| C              | 2.369768 | -2.28266 | -0.54377 | C | -2.36979 | -2.28268 | -0.54373 | C          | -2.36972 | -2.28262 | -0.54409 |
| C              | 1.113731 | -1.63895 | -0.47381 | C | -1.11374 | -1.63898 | -0.47374 | C          | -1.11367 | -1.63892 | -0.47384 |
| C              | 0.919552 | -0.28425 | -0.12032 | C | -0.91956 | -0.28428 | -0.12026 | C          | -0.91953 | -0.28426 | -0.12012 |
| C              | 2.003124 | 0.718516 | 0.069338 | C | -2.00313 | 0.718497 | 0.069385 | C          | -2.00317 | 0.718471 | 0.069711 |
| C              | 3.389525 | 0.567219 | 0.087148 | C | -3.38953 | 0.567212 | 0.087166 | C          | -3.38956 | 0.567129 | 0.087368 |
| C              | -0.32137 | 0.435916 | 0.022161 | C | 0.321373 | 0.435885 | 0.022218 | C          | 0.321355 | 0.43594  | 0.022645 |
| C              | 0.018818 | 1.810643 | 0.25049  | C | -0.01882 | 1.810612 | 0.250561 | C          | -0.01888 | 1.810632 | 0.250992 |
| C              | 1.38883  | 1.993548 | 0.286423 | C | -1.38883 | 1.993524 | 0.28649  | C          | -1.3889  | 1.99351  | 0.286951 |
| C              | 5.710783 | -0.41405 | 0.055366 | C | -5.7108  | -0.41402 | 0.05529  | C          | -5.71086 | -0.41411 | 0.054911 |
| C              | 6.291709 | 0.498477 | -1.04412 | C | -6.29167 | 0.498509 | -1.04422 | C          | -6.29154 | 0.49874  | -1.04443 |
| C              | 6.13585  | 0.063442 | 1.45903  | C | -6.13592 | 0.06348  | 1.458936 | C          | -6.13616 | 0.062987 | 1.458634 |
| C              | -0.05796 | -2.53733 | -0.82694 | C | 0.057953 | -2.53739 | -0.8268  | C          | 0.058097 | -2.53729 | -0.82672 |
| C              | 2.0976   | 3.295521 | 0.54513  | C | -2.09759 | 3.2955   | 0.545209 | C          | -2.09773 | 3.2954   | 0.545804 |
| C              | -1.63636 | -0.12474 | 0.088937 | C | 1.63637  | -0.12476 | 0.088971 | C          | 1.636384 | -0.1247  | 0.089342 |
| C              | -2.87209 | 0.489513 | -0.02245 | C | 2.872092 | 0.48952  | -0.02244 | C          | 2.872084 | 0.489538 | -0.02234 |
| C              | -4.04173 | -0.3096  | 0.21435  | C | 4.041743 | -0.30958 | 0.214326 | C          | 4.041811 | -0.30955 | 0.214214 |
| N              | -5.24727 | 0.224875 | 0.150946 | N | 5.247283 | 0.224903 | 0.150894 | N          | 5.247306 | 0.224952 | 0.150423 |
| C              | -5.56889 | 1.604086 | -0.20381 | C | 5.56888  | 1.604111 | -0.20389 | C          | 5.568823 | 1.60408  | -0.20461 |
| C              | -4.44792 | 2.182591 | -1.06402 | C | 4.447874 | 2.1826   | -1.06407 | C          | 4.447574 | 2.18255  | -1.06451 |
| C              | -3.08575 | 1.951886 | -0.39252 | C | 3.085727 | 1.951893 | -0.39253 | C          | 3.085618 | 1.951892 | -0.39256 |
| C              | -4.15932 | -1.87376 | 0.573027 | C | 4.159369 | -1.87374 | 0.572998 | C          | 4.15956  | -1.87372 | 0.573269 |
| O              | -5.3518  | -2.20877 | 0.767361 | O | 3.104203 | -2.53772 | 0.598554 | O          | 3.104344 | -2.53758 | 0.599507 |
| O              | -3.10414 | -2.53772 | 0.598596 | O | 5.351855 | -2.20871 | 0.767331 | O          | 5.352115 | -2.20861 | 0.767179 |
| H              | 4.428628 | -2.63121 | -0.45461 | H | -4.42866 | -2.6312  | -0.45464 | H          | -4.42862 | -2.63116 | -0.4554  |
| H              | 2.307501 | -3.33713 | -0.8035  | H | -2.30753 | -3.33715 | -0.80344 | H          | -2.30739 | -3.33706 | -0.80391 |
| H              | 3.930459 | 1.494117 | 0.268213 | H | -3.93046 | 1.494115 | 0.268229 | H          | -3.93054 | 1.493987 | 0.268571 |
| H              | -0.69781 | 2.598896 | 0.444971 | H | 0.697812 | 2.598861 | 0.445047 | H          | 0.697781 | 2.598869 | 0.445495 |
| H              | 6.146402 | -1.40919 | -0.09078 | H | -6.14643 | -1.40916 | -0.09087 | H          | -6.14643 | -1.40922 | -0.0916  |
| H              | 5.931548 | 1.52898  | -0.94798 | H | -6.01966 | 0.141098 | -2.04284 | H          | -5.93136 | 1.529208 | -0.94793 |
| H              | 6.019734 | 0.141069 | -2.04275 | H | -5.93151 | 1.529008 | -0.94807 | H          | -7.38502 | 0.525271 | -0.97897 |
| H              | 7.385175 | 0.52498  | -0.97845 | H | -7.38514 | 0.525021 | -0.9786  | H          | -6.01938 | 0.141615 | -2.04312 |
| H              | 5.749191 | -0.60024 | 2.239299 | H | -5.77306 | 1.075509 | 1.670218 | H          | -7.22879 | 0.082146 | 1.538768 |
| H              | 5.772983 | 1.07547  | 1.670305 | H | -5.74929 | -0.60019 | 2.239223 | H          | -5.77332 | 1.074956 | 1.670264 |
| H              | 7.228466 | 0.082604 | 1.539346 | H | -7.22854 | 0.082642 | 1.539212 | H          | -5.74964 | -0.60091 | 2.238789 |
| H              | 0.294362 | -3.44613 | -1.3197  | H | 0.632029 | -2.84645 | 0.051999 | H          | 0.761362 | -2.04223 | -1.49985 |

|   |          |          |          |   |          |          |          |   |          |          |          |
|---|----------|----------|----------|---|----------|----------|----------|---|----------|----------|----------|
| H | -0.76128 | -2.04231 | -1.49998 | H | 0.761268 | -2.04242 | -1.49988 | H | -0.29409 | -3.44621 | -1.31935 |
| H | -0.63204 | -2.84645 | 0.051834 | H | -0.29437 | -3.44623 | -1.31949 | H | 0.632362 | -2.84622 | 0.051987 |
| H | 2.752389 | 3.581634 | -0.28725 | H | -2.75237 | 3.58163  | -0.28717 | H | -1.37409 | 4.103913 | 0.683233 |
| H | 1.373864 | 4.103995 | 0.682289 | H | -1.37385 | 4.103967 | 0.682387 | H | -2.75244 | 3.581675 | -0.28659 |
| H | 2.717932 | 3.256001 | 1.449044 | H | -2.71793 | 3.255971 | 1.449116 | H | -2.71823 | 3.255724 | 1.449607 |
| H | -1.72149 | -1.18379 | 0.293476 | H | 1.721524 | -1.18381 | 0.293509 | H | 1.72153  | -1.18378 | 0.293788 |
| H | -5.96461 | -0.48571 | 0.37559  | H | 5.964623 | -0.48571 | 0.375518 | H | 5.964724 | -0.48568 | 0.374845 |
| H | -5.70197 | 2.192368 | 0.71431  | H | 6.525977 | 1.604924 | -0.73454 | H | 5.702273 | 2.1925   | 0.713378 |
| H | -6.526   | 1.604899 | -0.73443 | H | 5.701994 | 2.192406 | 0.714215 | H | 6.525761 | 1.604841 | -0.73555 |
| H | -4.46298 | 1.695508 | -2.04583 | H | 4.621362 | 3.251352 | -1.22599 | H | 4.462312 | 1.695408 | -2.0463  |
| H | -4.62142 | 3.251344 | -1.22592 | H | 4.62904  | 1.69551  | -2.04588 | H | 4.621079 | 3.251277 | -1.22655 |
| H | -3.01717 | 2.585731 | 0.503327 | H | 3.017179 | 2.585741 | 0.503321 | H | 3.017322 | 2.585781 | 0.50329  |
| H | -2.29179 | 2.280084 | -1.06965 | H | 2.29175  | 2.280091 | -1.06963 | H | 2.291426 | 2.280086 | -1.06941 |

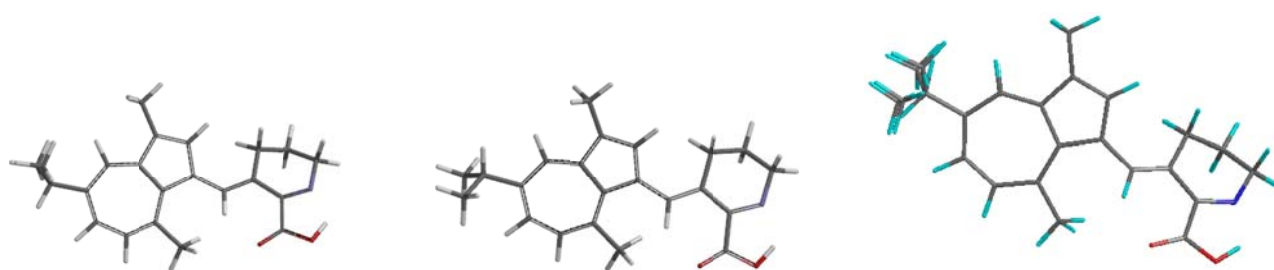

**1b1 (52.1%)**

**1b2 (47.8%)**

**Figure S3** Stable conformers of compound **1** with non-ionized salt structure.

**Table S3.** Important thermodynamic parameters (a.u.) of the optimized compound **1** with non-ionized structure at B3LYP/6-31g(d,p) level in the gas phase

| conformations | E+ZPE        | G            |
|---------------|--------------|--------------|
| <b>1b1</b>    | -1058.188364 | -1058.242606 |
| <b>1b2</b>    | -1058.188287 | -1058.242523 |

**Table S4.** Optimized Z-Matrixes of compound **1** with non-ionized structure in the Gas Phase (Å) at B3LYP/6-31g(d,p) level.

| <b>1b1</b> |          |          |          | <b>1b2</b> |          |          |          |
|------------|----------|----------|----------|------------|----------|----------|----------|
| C          | 4.188305 | -0.58631 | 0.117631 | C          | 4.19695  | -0.18532 | 0.041813 |
| C          | 3.669949 | -1.84244 | 0.440426 | C          | 3.763543 | -1.47531 | 0.372748 |
| C          | 2.354454 | -2.27409 | 0.616216 | C          | 2.484066 | -1.98997 | 0.560917 |
| C          | 1.107555 | -1.63368 | 0.478571 | C          | 1.193786 | -1.42943 | 0.43612  |
| C          | 0.918204 | -0.29657 | 0.07036  | C          | 0.914348 | -0.1124  | 0.025878 |
| C          | 2.01249  | 0.701118 | -0.14167 | C          | 1.937935 | 0.953637 | -0.20239 |
| C          | 3.393249 | 0.544388 | -0.11373 | C          | 3.329699 | 0.886932 | -0.18661 |
| C          | -0.31055 | 0.411513 | -0.12928 | C          | -0.36324 | 0.514193 | -0.16107 |
| C          | 0.031429 | 1.765812 | -0.42048 | C          | -0.1128  | 1.883495 | -0.45922 |
| C          | 1.402554 | 1.955063 | -0.43369 | C          | 1.246102 | 2.161255 | -0.48976 |
| C          | 5.708742 | -0.43251 | 0.034023 | C          | 5.702656 | 0.072016 | -0.05661 |

|   |          |          |          |   |          |          |          |
|---|----------|----------|----------|---|----------|----------|----------|
| C | 6.173519 | -0.00597 | -1.37144 | C | 6.419837 | -0.15295 | 1.288083 |
| C | 6.254236 | 0.522726 | 1.112729 | C | 6.358316 | -0.75281 | -1.18042 |
| C | -0.07934 | -2.51517 | 0.822563 | C | 0.072111 | -2.38532 | 0.799062 |
| C | 2.109886 | 3.244497 | -0.73561 | C | 1.862788 | 3.494274 | -0.80189 |
| C | -1.64362 | -0.14391 | -0.18273 | C | -1.65717 | -0.12828 | -0.19748 |
| C | -2.84465 | 0.481376 | 0.015678 | C | -2.89342 | 0.416991 | 0.019875 |
| C | -4.10586 | -0.23638 | -0.18387 | C | -4.1081  | -0.38138 | -0.15989 |
| N | -5.29166 | 0.262277 | -0.02869 | N | -5.32127 | 0.039131 | 0.013914 |
| C | -5.47084 | 1.631147 | 0.433763 | C | -5.58194 | 1.394079 | 0.478397 |
| C | -4.28525 | 2.149031 | 1.244571 | C | -4.42005 | 1.989825 | 1.269974 |
| C | -2.98711 | 1.926438 | 0.461276 | C | -3.12164 | 1.850053 | 0.468033 |
| C | -4.19576 | -1.71607 | -0.62779 | C | -4.10804 | -1.86467 | -0.60066 |
| O | -3.25913 | -2.46743 | -0.81098 | O | -3.12736 | -2.55393 | -0.79697 |
| O | -5.45977 | -2.1075  | -0.78534 | O | -5.3461  | -2.33811 | -0.73856 |
| H | 4.414392 | -2.61963 | 0.608141 | H | 4.554727 | -2.20445 | 0.536903 |
| H | 2.281814 | -3.31557 | 0.919644 | H | 2.47942  | -3.03347 | 0.866117 |
| H | 3.943452 | 1.459435 | -0.32382 | H | 3.82104  | 1.833992 | -0.40479 |
| H | -0.68538 | 2.537992 | -0.66713 | H | -0.87995 | 2.608109 | -0.69913 |
| H | 6.139416 | -1.42222 | 0.230614 | H | 5.827929 | 1.13045  | -0.31704 |
| H | 7.267231 | 0.026339 | -1.41946 | H | 5.979871 | 0.460716 | 2.080095 |
| H | 5.819207 | -0.70427 | -2.13573 | H | 6.360652 | -1.19986 | 1.605138 |
| H | 5.803102 | 0.99127  | -1.63259 | H | 7.4807   | 0.1064   | 1.205152 |
| H | 5.884379 | 1.543932 | 0.969364 | H | 6.297069 | -1.82774 | -0.97847 |
| H | 7.348202 | 0.560269 | 1.074208 | H | 5.874143 | -0.56636 | -2.14379 |
| H | 5.959196 | 0.198846 | 2.115454 | H | 7.418696 | -0.49575 | -1.27588 |
| H | -0.80726 | -1.98772 | 1.442329 | H | -0.43971 | -2.77895 | -0.08522 |
| H | 0.250619 | -3.40257 | 1.36674  | H | 0.464768 | -3.24012 | 1.353733 |
| H | -0.61241 | -2.86018 | -0.06925 | H | -0.68773 | -1.90082 | 1.415178 |
| H | 1.38649  | 4.038291 | -0.94118 | H | 2.514301 | 3.453736 | -1.68355 |
| H | 2.763975 | 3.163684 | -1.61268 | H | 1.086314 | 4.237115 | -1.00442 |
| H | 2.734401 | 3.580927 | 0.101445 | H | 2.469788 | 3.875044 | 0.028979 |
| H | -1.71794 | -1.18559 | -0.45116 | H | -1.66664 | -1.1726  | -0.46641 |
| H | -5.63987 | 2.266643 | -0.44903 | H | -6.50085 | 1.370518 | 1.075056 |
| H | -6.39901 | 1.667507 | 1.015241 | H | -5.80709 | 2.01523  | -0.40214 |
| H | -4.41917 | 3.210032 | 1.481337 | H | -4.32468 | 1.455348 | 2.22322  |
| H | -4.23908 | 1.608063 | 2.197762 | H | -4.61902 | 3.040419 | 1.507384 |
| H | -2.98604 | 2.593409 | -0.41412 | H | -3.17539 | 2.515386 | -0.40693 |
| H | -2.12237 | 2.211053 | 1.067978 | H | -2.26763 | 2.189034 | 1.061934 |
| H | -5.98417 | -1.29643 | -0.54776 | H | -5.91854 | -1.56254 | -0.49373 |

**Table S5.** Calculated  $^{13}\text{C}$  NMR chemical shifts for the conformers of **1** with respective inner salt (**1a1-1a9**) and non-ionized structure (**1b1** and **1b2**).

| No. | 1a1   | 1a2   | 1a3 1 | a4 1  | a5 1  | a6 1  | a7 1  | a8    | 1a9   | 1b1   | 1b2   |
|-----|-------|-------|-------|-------|-------|-------|-------|-------|-------|-------|-------|
| 1   | 135.8 | 135.8 | 135.3 | 135.3 | 135.3 | 135.3 | 135.3 | 135.3 | 135.3 | 131.9 | 132.1 |
| 2   | 146.1 | 146.1 | 145.3 | 145.3 | 145.3 | 145.3 | 145.3 | 145.3 | 145.3 | 144.2 | 144.8 |
| 3   | 130.3 | 130.3 | 130.6 | 130.6 | 130.6 | 130.6 | 130.6 | 130.6 | 130.6 | 129.1 | 128.6 |
| 4   | 161.5 | 161.5 | 161.0 | 161.0 | 161.0 | 161.0 | 161.0 | 161.0 | 161.0 | 158.4 | 158.6 |
| 5   | 140.5 | 140.5 | 140.9 | 140.9 | 140.9 | 140.9 | 140.9 | 140.9 | 140.9 | 135.6 | 135.0 |
| 6   | 143.2 | 143.2 | 146.8 | 146.8 | 146.8 | 146.8 | 146.8 | 146.8 | 146.8 | 144.7 | 141.4 |
| 7   | 157.6 | 157.6 | 157.6 | 157.6 | 157.6 | 157.6 | 157.6 | 157.6 | 157.6 | 152.4 | 151.8 |
| 8   | 143.2 | 143.2 | 140.4 | 140.4 | 140.4 | 140.4 | 140.4 | 140.4 | 140.4 | 139.4 | 142.7 |
| 9   | 151.5 | 151.5 | 151.8 | 151.8 | 151.8 | 151.8 | 151.8 | 151.8 | 151.8 | 148.1 | 147.6 |

|    |       |       |       |       |       |       |       |       |       |       |       |
|----|-------|-------|-------|-------|-------|-------|-------|-------|-------|-------|-------|
| 10 | 150.6 | 150.6 | 150.7 | 150.7 | 150.7 | 150.7 | 150.7 | 150.7 | 150.7 | 146.1 | 146.2 |
| 11 | 46.5  | 46.5  | 46.0  | 46.0  | 46.0  | 46.0  | 46.0  | 46.0  | 46.0  | 45.9  | 46.1  |
| 12 | 25.9  | 25.9  | 26.0  | 26.0  | 26.1  | 26.0  | 26.1  | 26.1  | 26.1  | 25.9  | 25.9  |
| 13 | 25.4  | 25.4  | 26.1  | 26.1  | 26.0  | 26.1  | 26.0  | 26.0  | 26.0  | 26.2  | 25.6  |
| 14 | 15.1  | 15.1  | 15.3  | 15.3  | 15.3  | 15.3  | 15.3  | 15.3  | 15.3  | 14.8  | 14.8  |
| 15 | 32.9  | 32.9  | 32.8  | 32.8  | 32.8  | 32.8  | 32.8  | 32.8  | 32.8  | 32.1  | 32.1  |
| 16 | 160.1 | 160.1 | 160.7 | 160.7 | 160.7 | 160.7 | 160.7 | 160.7 | 160.7 | 145.8 | 144.6 |
| 2' | 171.4 | 171.4 | 171.4 | 171.4 | 171.4 | 171.4 | 171.4 | 171.4 | 171.4 | 163.1 | 163.1 |
| 3' | 124.0 | 124.0 | 124.2 | 124.2 | 124.2 | 124.2 | 124.2 | 124.2 | 124.2 | 126.9 | 126.8 |
| 4' | 28.5  | 28.5  | 28.7  | 28.7  | 28.7  | 28.7  | 28.7  | 28.7  | 28.7  | 29.7  | 29.3  |
| 5' | 24.4  | 24.4  | 24.4  | 24.4  | 24.4  | 24.4  | 24.4  | 24.4  | 24.5  | 25.5  | 25.6  |
| 6' | 45.4  | 45.4  | 45.3  | 45.3  | 45.3  | 45.3  | 45.3  | 45.3  | 45.3  | 53.5  | 53.4  |
| 7' | 166.0 | 166.0 | 165.9 | 165.9 | 165.9 | 165.9 | 165.9 | 165.9 | 165.9 | 172.2 | 172.4 |

## 2. ECD calculations for 2 to determine the absolute configurations.

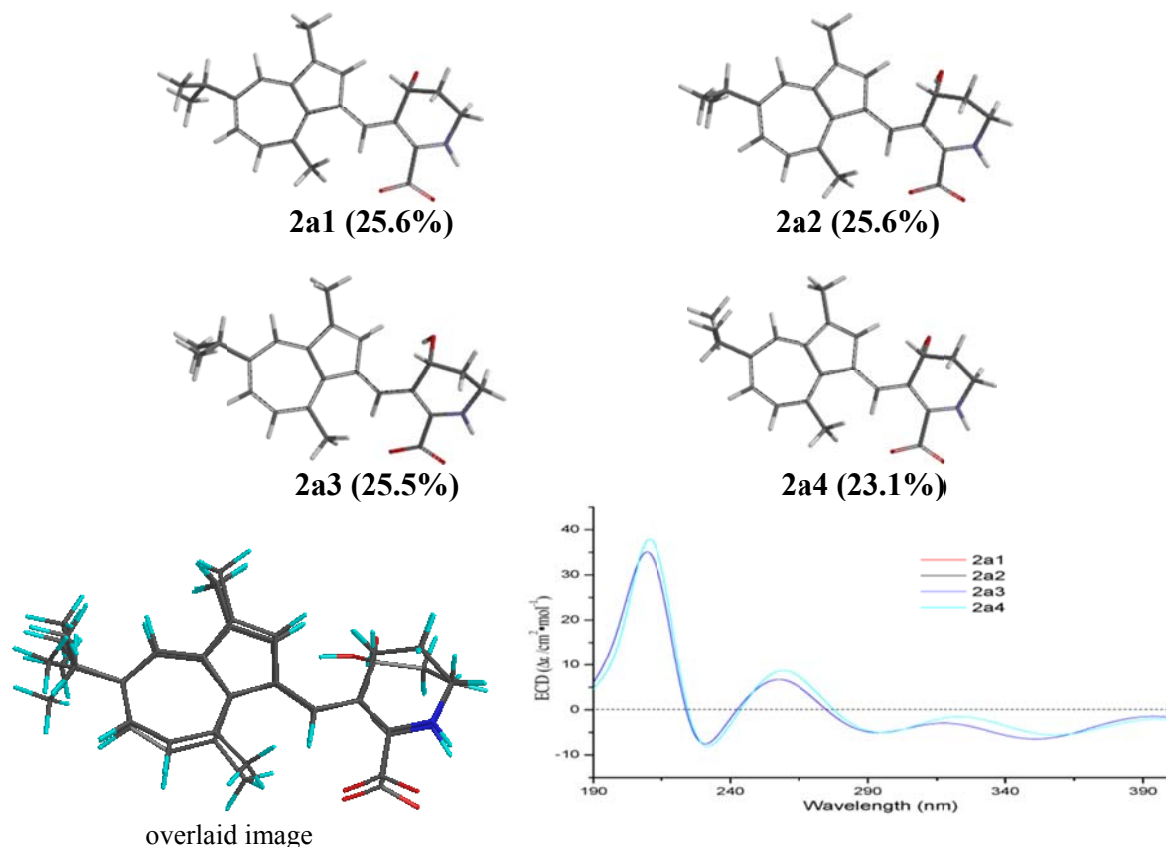

**Figure S4.** Structural candidates of compound **2** with 4'-*R* absolute configuration and the overlaid ECD calculated on Gaussian program.

**Table S6.** Important thermodynamic parameters (a.u.) of the optimized **2** with 4'-*R* absolute configuration at B3LYP/6-31G(d,p) level in the gas phase

| conformations | E+ZPE        | G            |
|---------------|--------------|--------------|
| <b>2a1</b>    | -1133.468941 | -1133.524646 |
| <b>2a2</b>    | -1133.468941 | -1133.524647 |
| <b>2a3</b>    | -1133.468940 | -1133.524644 |
| <b>2a4</b>    | -1133.468923 | -1133.524551 |

**Table S7.** Optimized Z-Matrixes of compound **2** with 4'-*R* absolute configuration in the Gas Phase (Å) at B3LYP/DGDZVP level.

| 2a1 2a2 |          |          |          |   |          |          |          |
|---------|----------|----------|----------|---|----------|----------|----------|
| C       | -4.33893 | -0.15106 | -0.00081 | C | -4.33886 | -0.15114 | -0.00093 |
| C       | -3.95644 | -1.48386 | 0.224366 | C | -3.95635 | -1.48391 | 0.224447 |
| C       | -2.70035 | -2.04851 | 0.434549 | C | -2.70026 | -2.04844 | 0.434956 |
| C       | -1.38543 | -1.52108 | 0.426136 | C | -1.38536 | -1.52093 | 0.426511 |
| C       | -1.05672 | -0.18172 | 0.128945 | C | -1.05673 | -0.1816  | 0.12917  |
| C       | -2.03301 | 0.926519 | -0.02612 | C | -2.03302 | 0.92663  | -0.02589 |
| C       | -3.43091 | 0.909018 | -0.07745 | C | -3.43091 | 0.909021 | -0.07738 |
| C       | 0.253348 | 0.42424  | 0.032609 | C | 0.253328 | 0.424369 | 0.032891 |
| C       | 0.049941 | 1.835133 | -0.13213 | C | 0.049916 | 1.835268 | -0.13185 |
| C       | -1.29789 | 2.145538 | -0.1686  | C | -1.29793 | 2.145666 | -0.16824 |
| C       | -5.82941 | 0.16009  | -0.15292 | C | -5.82932 | 0.159969 | -0.1534  |
| C       | -6.62905 | -0.17783 | 1.121892 | C | -6.43739 | -0.52702 | -1.39325 |
| C       | -6.43767 | -0.52671 | -1.39281 | C | -6.62921 | -0.17777 | 1.121318 |
| C       | -0.31702 | -2.53989 | 0.779721 | C | -0.31692 | -2.53967 | 0.780262 |
| C       | -1.87647 | 3.519893 | -0.37064 | C | -1.87653 | 3.520033 | -0.37014 |
| C       | 1.501749 | -0.26122 | -0.04319 | C | 1.501709 | -0.2611  | -0.04307 |
| C       | 2.801283 | 0.219207 | 0.072773 | C | 2.801282 | 0.219239 | 0.072748 |
| C       | 3.892615 | -0.68993 | -0.14217 | C | 3.892522 | -0.69    | -0.14234 |
| N       | 5.141518 | -0.28053 | -0.03515 | N | 5.141465 | -0.28065 | -0.03554 |
| C       | 5.580062 | 1.069073 | 0.31141  | C | 5.580083 | 1.068964 | 0.310775 |
| C       | 4.500755 | 1.752149 | 1.144368 | C | 4.501029 | 1.752039 | 1.144082 |
| C       | 3.141696 | 1.650244 | 0.446408 | C | 3.141842 | 1.650236 | 0.446364 |
| C       | 3.85375  | -2.25175 | -0.51815 | C | 3.853548 | -2.25185 | -0.51811 |
| O       | 3.15923  | 2.532414 | -0.70674 | O | 3.159216 | 2.532449 | -0.70677 |
| O       | 5.007869 | -2.71579 | -0.66746 | O | 2.731032 | -2.79026 | -0.6024  |
| O       | 2.731282 | -2.79023 | -0.60235 | O | 5.007614 | -2.71604 | -0.66731 |
| H       | -4.77212 | -2.20346 | 0.274133 | H | -4.772   | -2.20352 | 0.274167 |
| H       | -2.73978 | -3.11496 | 0.645317 | H | -2.73966 | -3.11484 | 0.645967 |
| H       | -3.88148 | 1.890027 | -0.22118 | H | -3.88154 | 1.890001 | -0.22114 |
| H       | 0.842375 | 2.55826  | -0.289   | H | 0.842345 | 2.558405 | -0.28868 |
| H       | -5.91613 | 1.24164  | -0.30945 | H | -5.91601 | 1.241492 | -0.31011 |
| H       | -6.21638 | 0.332932 | 1.998155 | H | -7.48144 | -0.22118 | -1.52303 |
| H       | -6.62673 | -1.25365 | 1.329474 | H | -6.42355 | -1.61863 | -1.30002 |
| H       | -7.67367 | 0.13243  | 1.00822  | H | -5.88985 | -0.26237 | -2.30373 |
| H       | -5.89033 | -0.26176 | -2.30332 | H | -6.21667 | 0.333038 | 1.997615 |
| H       | -6.42361 | -1.61834 | -1.29982 | H | -6.62699 | -1.25358 | 1.328967 |
| H       | -7.48179 | -0.22101 | -1.52232 | H | -7.67379 | 0.132545 | 1.007441 |
| H       | -0.76943 | -3.41998 | 1.242097 | H | 0.243474 | -2.88571 | -0.09382 |
| H       | 0.415547 | -2.13361 | 1.480206 | H | 0.415885 | -2.1332  | 1.480364 |
| H       | 0.243686 | -2.88553 | -0.09432 | H | -0.76931 | -3.41951 | 1.243132 |
| H       | -1.07716 | 4.261744 | -0.4501  | H | -2.47657 | 3.584948 | -1.28617 |
| H       | -2.52177 | 3.821643 | 0.463484 | H | -2.52173 | 3.821729 | 0.464079 |
| H       | -2.47641 | 3.58475  | -1.28675 | H | -1.07722 | 4.261887 | -0.44964 |
| H       | 1.481457 | -1.32132 | -0.26009 | H | 1.481319 | -1.32119 | -0.26005 |
| H       | 5.792866 | -1.05562 | -0.24408 | H | 5.792797 | -1.05575 | -0.24443 |
| H       | 6.525082 | 0.992826 | 0.856492 | H | 6.525336 | 0.992824 | 0.855462 |
| H       | 5.767949 | 1.636466 | -0.60871 | H | 5.767535 | 1.636372 | -0.60943 |
| H       | 4.752883 | 2.806624 | 1.289307 | H | 4.434809 | 1.279676 | 2.13137  |
| H       | 4.434375 | 1.279914 | 2.131705 | H | 4.753266 | 2.806474 | 1.289084 |
| H       | 2.376413 | 2.030348 | 1.131824 | H | 2.376698 | 2.030391 | 1.131911 |
| H       | 2.941034 | 2.006848 | -1.49218 | H | 2.940834 | 2.006921 | -1.49219 |
| 2a3 2a4 |          |          |          |   |          |          |          |

|   |          |          |          |   |          |          |          |
|---|----------|----------|----------|---|----------|----------|----------|
| C | -4.33891 | -0.15103 | -0.00079 | C | -4.33885 | 0.564654 | -0.05067 |
| C | -3.95643 | -1.48385 | 0.224279 | C | -3.86858 | 1.865922 | -0.27061 |
| C | -2.70035 | -2.0485  | 0.434528 | C | -2.57098 | 2.351382 | -0.45129 |
| C | -1.38544 | -1.52104 | 0.426292 | C | -1.29507 | 1.744575 | -0.41388 |
| C | -1.0567  | -0.18169 | 0.129121 | C | -1.05863 | 0.381384 | -0.12398 |
| C | -2.03299 | 0.926559 | -0.02589 | C | -2.10901 | -0.66082 | 0.01374  |
| C | -3.43088 | 0.909058 | -0.07727 | C | -3.49971 | -0.55359 | 0.04458  |
| C | 0.253354 | 0.42425  | 0.03283  | C | 0.204572 | -0.31053 | -0.01818 |
| C | 0.049963 | 1.835164 | -0.13182 | C | -0.09312 | -1.70797 | 0.13984  |
| C | -1.29786 | 2.145591 | -0.16823 | C | -1.45608 | -1.92842 | 0.162811 |
| C | -5.82937 | 0.160121 | -0.15306 | C | -5.84995 | 0.355866 | 0.070793 |
| C | -6.43731 | -0.52629 | -1.39333 | C | -6.25023 | -0.18677 | 1.457818 |
| C | -6.6293  | -0.17827 | 1.121441 | C | -6.40832 | -0.53284 | -1.05936 |
| C | -0.31708 | -2.53989 | 0.779967 | C | -0.15435 | 2.696269 | -0.72662 |
| C | -1.87644 | 3.519955 | -0.37021 | C | -2.12767 | -3.26133 | 0.353907 |
| C | 1.501743 | -0.26121 | -0.04308 | C | 1.498692 | 0.285216 | 0.05885  |
| C | 2.801295 | 0.219181 | 0.072787 | C | 2.759647 | -0.28649 | -0.06863 |
| C | 3.892582 | -0.68996 | -0.14231 | C | 3.915137 | 0.539654 | 0.147909 |
| N | 5.141506 | -0.28052 | -0.03565 | N | 5.130644 | 0.043473 | 0.025785 |
| C | 5.580114 | 1.069062 | 0.310901 | C | 5.469277 | -1.32922 | -0.34124 |
| C | 4.500979 | 1.752071 | 1.144139 | C | 4.337282 | -1.9231  | -1.1727  |
| C | 3.141793 | 1.650198 | 0.446436 | C | 2.995007 | -1.73402 | -0.4599  |
| C | 3.853615 | -2.2518  | -0.51805 | C | 3.990883 | 2.095194 | 0.543332 |
| O | 3.159103 | 2.532448 | -0.70666 | O | 2.95983  | -2.62714 | 0.684285 |
| O | 2.7311   | -2.79027 | -0.60186 | O | 2.910596 | 2.712087 | 0.638661 |
| O | 5.007678 | -2.7159  | -0.6676  | O | 5.176145 | 2.472411 | 0.693275 |
| H | -4.7721  | -2.20346 | 0.27391  | H | -4.63889 | 2.633441 | -0.34042 |
| H | -2.73979 | -3.11496 | 0.645228 | H | -2.54171 | 3.418278 | -0.661   |
| H | -3.88145 | 1.890081 | -0.22094 | H | -4.00971 | -1.5052  | 0.181456 |
| H | 0.842383 | 2.558319 | -0.28862 | H | 0.649549 | -2.48136 | 0.299812 |
| H | -5.9161  | 1.241721 | -0.30924 | H | -6.31726 | 1.341604 | -0.03577 |
| H | -6.42317 | -1.61794 | -1.30072 | H | -5.88177 | 0.460481 | 2.260369 |
| H | -7.48143 | -0.22063 | -1.52296 | H | -5.85182 | -1.19287 | 1.629801 |
| H | -5.88979 | -0.26097 | -2.30363 | H | -7.34102 | -0.24587 | 1.54224  |
| H | -7.67389 | 0.132019 | 1.007636 | H | -6.01611 | -1.55455 | -1.00407 |
| H | -6.21684 | 0.332191 | 1.99798  | H | -6.15439 | -0.12983 | -2.04529 |
| H | -6.62702 | -1.25416 | 1.328653 | H | -7.49987 | -0.59573 | -0.98865 |
| H | 0.415631 | -2.13357 | 1.480267 | H | 0.556528 | 2.260712 | -1.43219 |
| H | -0.76953 | -3.41983 | 1.242563 | H | 0.41867  | 2.975414 | 0.162731 |
| H | 0.243467 | -2.88573 | -0.0941  | H | -0.53827 | 3.61916  | -1.16647 |
| H | -2.52217 | 3.821453 | 0.463668 | H | -2.74641 | -3.28649 | 1.259442 |
| H | -1.07714 | 4.261887 | -0.44908 | H | -1.38057 | -4.05427 | 0.446735 |
| H | -2.47592 | 3.584987 | -1.28661 | H | -2.77654 | -3.52036 | -0.49183 |
| H | 1.48142  | -1.32133 | -0.25992 | H | 1.555376 | 1.342029 | 0.28462  |
| H | 5.792848 | -1.05558 | -0.24466 | H | 5.837279 | 0.766905 | 0.240681 |
| H | 6.525256 | 0.992774 | 0.855766 | H | 5.623366 | -1.92054 | 0.570064 |
| H | 5.767805 | 1.636531 | -0.60921 | H | 6.413099 | -1.31339 | -0.89346 |
| H | 4.434836 | 1.279785 | 2.131467 | H | 4.512606 | -2.99081 | -1.33307 |
| H | 4.753115 | 2.806546 | 1.28907  | H | 4.296037 | -1.43448 | -2.15342 |
| H | 2.376619 | 2.030267 | 1.131992 | H | 2.198635 | -2.05257 | -1.14093 |
| H | 2.941057 | 2.006884 | -1.49214 | H | 2.806448 | -2.09304 | 1.479257 |

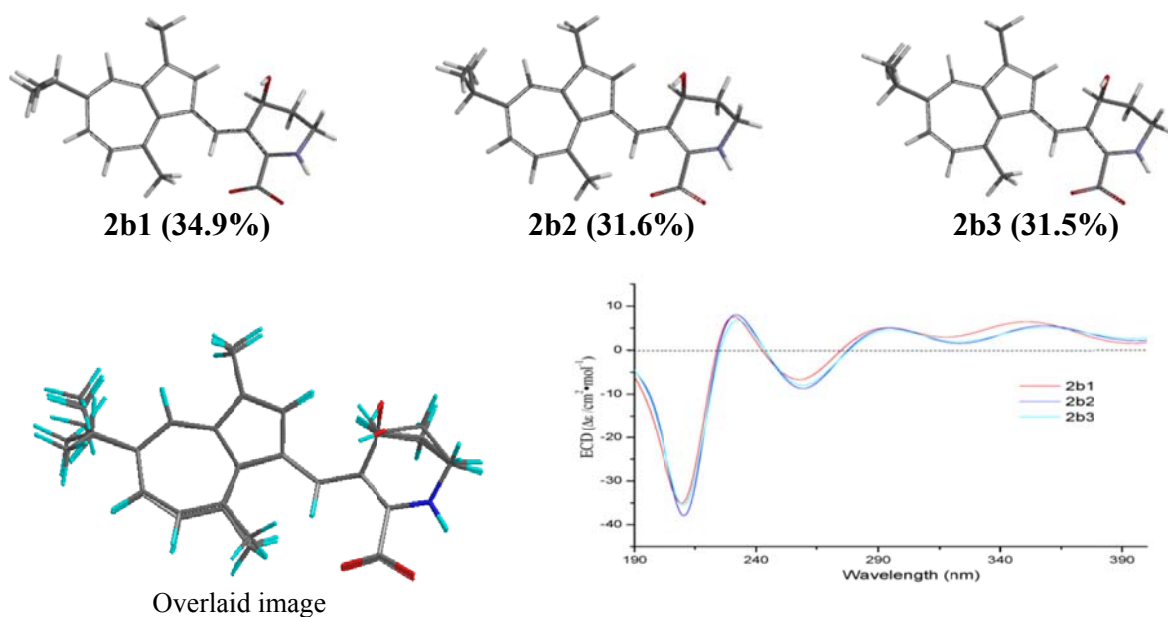

**Figure S5.** Structural candidates of compound **2** with 4'-*S* absolute configuration and the overlaid ECD calculated on Gaussian program.

**Table S8.** Important thermodynamic parameters (a.u.) of the optimized **2** with 4'-*S* absolute configuration at B3LYP/6-31G(d,p) level in the gas phase

| conformations | E+ZPE        | G            |
|---------------|--------------|--------------|
| <b>2b1</b>    | -1133.468942 | -1133.524646 |
| <b>2b2</b>    | -1133.468924 | -1133.524552 |
| <b>2b3</b>    | -1133.468923 | -1133.524551 |

**Table S9.** Optimized Z-Matrixes of compound **2** with 4'-*S* absolute configuration in the Gas Phase (Å) at B3LYP/DGDZVP level.

| 2b1 |          |          |          | 2b2 |          |          |          | 2b3 |          |          |          |
|-----|----------|----------|----------|-----|----------|----------|----------|-----|----------|----------|----------|
| C   | 4.338869 | -0.15105 | -0.00084 | C   | 4.338882 | 0.564657 | -0.05074 | C   | 4.338836 | 0.564667 | -0.0505  |
| C   | 3.956375 | -1.48387 | 0.224297 | C   | 3.868593 | 1.865938 | -0.2706  | C   | 3.868528 | 1.865956 | -0.27031 |
| C   | 2.700306 | -2.04847 | 0.434691 | C   | 2.570977 | 2.351418 | -0.45114 | C   | 2.570937 | 2.351376 | -0.45119 |
| C   | 1.385407 | -1.52096 | 0.426433 | C   | 1.295058 | 1.744614 | -0.41366 | C   | 1.295047 | 1.744519 | -0.41397 |
| C   | 1.056724 | -0.18163 | 0.129191 | C   | 1.058632 | 0.381404 | -0.12382 | C   | 1.05861  | 0.381324 | -0.12403 |
| C   | 2.032994 | 0.926615 | -0.02593 | C   | 2.109026 | -0.66079 | 0.013873 | C   | 2.10901  | -0.66085 | 0.013646 |
| C   | 3.430896 | 0.909076 | -0.07728 | C   | 3.499731 | -0.55357 | 0.044583 | C   | 3.499708 | -0.55361 | 0.044492 |
| C   | -0.25334 | 0.424304 | 0.032834 | C   | -0.20457 | -0.31053 | -0.01803 | C   | -0.20458 | -0.3106  | -0.01828 |
| C   | -0.04996 | 1.835199 | -0.13193 | C   | 0.093151 | -1.70797 | 0.140004 | C   | 0.093136 | -1.70806 | 0.139694 |
| C   | 1.297872 | 2.145625 | -0.16836 | C   | 1.456115 | -1.9284  | 0.162955 | C   | 1.456096 | -1.92849 | 0.162636 |
| C   | 5.82934  | 0.16004  | -0.15315 | C   | 5.849983 | 0.355857 | 0.070553 | C   | 5.849918 | 0.355912 | 0.071008 |
| C   | 6.437307 | -0.5265  | -1.39332 | C   | 6.408188 | -0.53299 | -1.05957 | C   | 6.40836  | -0.53259 | -1.05928 |
| C   | 6.629244 | -0.17823 | 1.121411 | C   | 6.250454 | -0.18664 | 1.457587 | C   | 6.250179 | -0.18695 | 1.457953 |
| C   | 0.317008 | -2.53972 | 0.780232 | C   | 0.154326 | 2.69634  | -0.72628 | C   | 0.154351 | 2.696134 | -0.72707 |
| C   | 1.876443 | 3.520008 | -0.37024 | C   | 2.127729 | -3.2613  | 0.353952 | C   | 2.127732 | -3.26139 | 0.353565 |
| C   | -1.50172 | -0.26117 | -0.04309 | C   | -1.49871 | 0.2852   | 0.058925 | C   | -1.49867 | 0.285169 | 0.058788 |
| C   | -2.80127 | 0.219202 | 0.072819 | C   | -2.75966 | -0.28649 | -0.06866 | C   | -2.75967 | -0.28649 | -0.06865 |
| C   | -3.89253 | -0.68997 | -0.14236 | C   | -3.91517 | 0.539632 | 0.147851 | C   | -3.91509 | 0.5397   | 0.14797  |



|   |          |          |          |   |          |          |          |   |          |          |          |
|---|----------|----------|----------|---|----------|----------|----------|---|----------|----------|----------|
| N | -5.14146 | -0.28059 | -0.0356  | N | -5.13067 | 0.043401 | 0.025764 | N | -5.13065 | 0.043539 | 0.026059 |
| C | -5.58009 | 1.06896  | 0.310963 | C | -5.46929 | -1.32928 | -0.34132 | C | -5.4694  | -1.32908 | -0.34109 |
| C | -4.50097 | 1.752001 | 1.144207 | C | -4.33724 | -1.92319 | -1.17266 | C | -4.33745 | -1.92304 | -1.17255 |
| C | -3.1418  | 1.650203 | 0.446461 | C | -2.99499 | -1.73404 | -0.45986 | C | -2.99512 | -1.73402 | -0.45986 |
| C | -3.85357 | -2.25181 | -0.51819 | C | -3.99097 | 2.09517  | 0.543166 | C | -3.99072 | 2.095211 | 0.54333  |
| O | -3.15918 | 2.532432 | -0.70665 | O | -2.95985 | -2.62709 | 0.684385 | O | -2.95989 | -2.62712 | 0.684324 |
| O | -5.00763 | -2.7159  | -0.6677  | O | -2.91069 | 2.712059 | 0.638671 | O | -2.91038 | 2.712066 | 0.638531 |
| O | -2.73106 | -2.79028 | -0.60208 | O | -5.17626 | 2.472446 | 0.69281  | O | -5.17594 | 2.47252  | 0.693392 |
| H | 4.772052 | -2.20348 | 0.273916 | H | 4.638902 | 2.633453 | -0.34046 | H | 4.638821 | 2.63351  | -0.33992 |
| H | 2.739724 | -3.11491 | 0.645507 | H | 2.541697 | 3.418327 | -0.66078 | H | 2.541642 | 3.418279 | -0.66087 |
| H | 3.881499 | 1.890082 | -0.22094 | H | 4.009736 | -1.50519 | 0.181377 | H | 4.009719 | -1.50524 | 0.181196 |
| H | -0.84239 | 2.558322 | -0.2888  | H | -0.64949 | -2.48139 | 0.299915 | H | -0.64954 | -2.48143 | 0.299685 |
| H | 5.916113 | 1.241621 | -0.30944 | H | 6.317302 | 1.341573 | -0.03618 | H | 6.317208 | 1.34168  | -0.03537 |
| H | 5.889828 | -0.26126 | -2.30367 | H | 6.154134 | -0.1301  | -2.04551 | H | 6.154474 | -0.12942 | -2.04515 |
| H | 6.423156 | -1.61815 | -1.30062 | H | 6.015972 | -1.55469 | -1.0041  | H | 7.499903 | -0.59549 | -0.98852 |
| H | 7.481437 | -0.22087 | -1.52295 | H | 7.499744 | -0.59589 | -0.989   | H | 6.016152 | -1.55431 | -1.00417 |
| H | 6.626985 | -1.25411 | 1.328703 | H | 5.852047 | -1.1927  | 1.629735 | H | 5.851824 | -1.19311 | 1.629731 |
| H | 6.216753 | 0.332295 | 1.997898 | H | 5.882124 | 0.460714 | 2.260119 | H | 7.340964 | -0.24599 | 1.542409 |
| H | 7.67383  | 0.132077 | 1.007602 | H | 7.341251 | -0.24575 | 1.541855 | H | 5.881639 | 0.460123 | 2.260608 |
| H | -0.24352 | -2.88566 | -0.09381 | H | -0.41876 | 2.975317 | 0.163068 | H | -0.55646 | 2.260327 | -1.43256 |
| H | -0.4157  | -2.13334 | 1.48048  | H | -0.55649 | 2.260867 | -1.43197 | H | 0.538338 | 3.618865 | -1.16719 |
| H | 0.769447 | -3.41962 | 1.242942 | H | 0.538244 | 3.619312 | -1.16596 | H | -0.41874 | 2.975581 | 0.162136 |
| H | 2.5209   | 3.822057 | 0.464432 | H | 2.775999 | -3.5206  | -0.49216 | H | 2.74728  | -3.28634 | 1.258546 |
| H | 1.077094 | 4.261723 | -0.45065 | H | 1.380633 | -4.05417 | 0.447491 | H | 2.775806 | -3.52074 | -0.49268 |
| H | 2.477242 | 3.584722 | -1.28579 | H | 2.747073 | -3.28629 | 1.259073 | H | 1.380643 | -4.05424 | 0.447317 |
| H | -1.48136 | -1.32127 | -0.26005 | H | -1.5554  | 1.34203  | 0.28463  | H | -1.55534 | 1.342007 | 0.284484 |
| H | -5.7928  | -1.05566 | -0.24458 | H | -5.83731 | 0.76686  | 0.24056  | H | -5.83721 | 0.766981 | 0.241161 |
| H | -5.76776 | 1.636461 | -0.60914 | H | -5.62356 | -1.92059 | 0.569959 | H | -5.62371 | -1.92044 | 0.570153 |
| H | -6.52525 | 0.992691 | 0.855808 | H | -6.41304 | -1.3134  | -0.89369 | H | -6.41317 | -1.3131  | -0.89342 |
| H | -4.75318 | 2.80644  | 1.289236 | H | -4.51253 | -2.99091 | -1.33297 | H | -4.29623 | -1.43444 | -2.15328 |
| H | -4.43474 | 1.279634 | 2.131492 | H | -4.29596 | -1.43464 | -2.15342 | H | -4.51284 | -2.99073 | -1.33288 |
| H | -2.37663 | 2.030316 | 1.132003 | H | -2.19861 | -2.0526  | -1.14089 | H | -2.19882 | -2.05261 | -1.14096 |
| H | -2.94074 | 2.006948 | -1.49207 | H | -2.80611 | -2.09301 | 1.479294 | H | -2.80657 | -2.09301 | 1.479298 |

### 3. ECD and OR calculations for 4 to determine the absolute configurations.

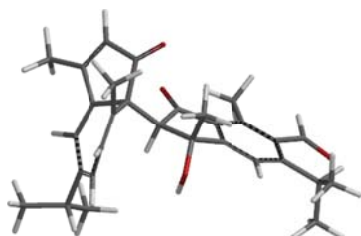

**4a1 (96.0%,  $[\alpha]_D = 276.44$ )**

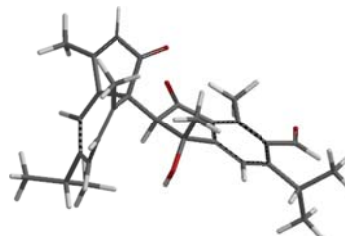

**4a2 (3.9%)**

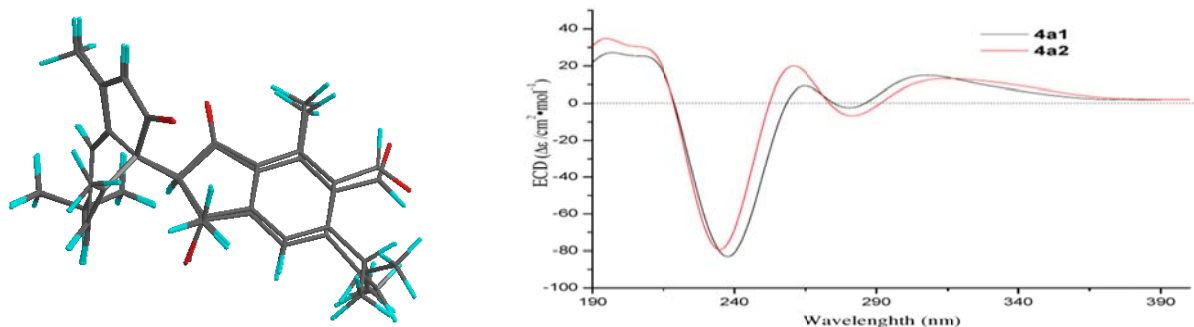

**Figure S6.** Structural candidates of compound **4a** with  $10S,1'R,2'R$  absolute configuration, and the optical rotation and overlaid ECD calculated on Gaussian program.

**Table S10.** Important thermodynamic parameters (a.u.) of the optimized **2** with  $10S,1'R,2'R$  absolute configuration at B3LYP/6-31G(d,p) level in the gas phase

| conformations | E+ZPE        | G            |
|---------------|--------------|--------------|
| <b>4a1</b>    | -1464.009683 | -1464.073696 |
| <b>4a2</b>    | -1464.005352 | -1464.070662 |

**Table S11.** Optimized Z-Matrixes of compound **4** with  $10S,1'R,2'R$  absolute configuration in the Gas Phase (Å) at B3LYP/6-31g(d,p) level.

| 4a1 |          |          |          | 4a2 |          |          |          |
|-----|----------|----------|----------|-----|----------|----------|----------|
| C   | 3.146499 | 1.946038 | 0.092825 | C   | -3.21375 | 1.8782   | -0.30885 |
| C   | 2.898552 | 1.825494 | 1.439365 | C   | -3.01979 | 1.579911 | -1.63615 |
| C   | 2.941951 | 0.62662  | 2.233995 | C   | -3.06389 | 0.282883 | -2.25843 |
| C   | 2.693673 | -0.65461 | 1.854718 | C   | -2.76519 | -0.92914 | -1.7213  |
| C   | 2.043395 | -0.95305 | 0.497709 | C   | -2.05411 | -1.02653 | -0.36512 |
| C   | 3.079096 | -0.48464 | -0.51719 | C   | -3.05945 | -0.4448  | 0.622084 |
| C   | 3.457498 | 0.805828 | -0.73257 | C   | -3.46266 | 0.854888 | 0.676241 |
| C   | 1.989214 | -2.48656 | 0.200866 | C   | -1.94783 | -2.50331 | 0.135097 |
| C   | 3.027923 | -2.7877  | -0.78398 | C   | -2.93753 | -2.68796 | 1.196382 |
| C   | 3.6186   | -1.64868 | -1.22362 | C   | -3.53923 | -1.51198 | 1.503045 |
| C   | 3.272086 | 3.33907  | -0.52287 | C   | -3.34134 | 3.339242 | 0.11993  |
| C   | 3.083406 | -1.80693 | 2.741207 | C   | -3.15496 | -2.19929 | -2.42921 |
| C   | 4.676672 | -1.55533 | -2.27819 | C   | -4.55486 | -1.29573 | 2.581019 |
| O   | 1.210486 | -3.2808  | 0.705932 | O   | -1.17104 | -3.34374 | -0.29179 |
| C   | -0.11112 | -0.79432 | -0.94308 | C   | 0.150225 | -0.61552 | 0.947193 |
| C   | 0.652462 | -0.26845 | 0.287864 | C   | -0.67569 | -0.28998 | -0.3131  |
| C   | -0.43159 | -0.14198 | 1.421161 | C   | 0.359087 | -0.30312 | -1.4967  |
| C   | -1.72529 | -0.12348 | 0.611099 | C   | 1.678818 | -0.12437 | -0.75069 |
| C   | -1.55797 | -0.5578  | -0.70525 | C   | 1.579435 | -0.35851 | 0.621189 |
| C   | -2.97044 | 0.264403 | 1.083577 | C   | 2.890358 | 0.231017 | -1.32455 |
| C   | -4.09267 | 0.20695  | 0.249938 | C   | 4.045368 | 0.324809 | -0.54099 |
| C   | -3.92567 | -0.26307 | -1.09185 | C   | 3.950097 | 0.057349 | 0.861932 |
| C   | -2.65244 | -0.65831 | -1.58169 | C   | 2.705221 | -0.2827  | 1.464165 |
| O   | -0.30188 | 1.053974 | 2.194268 | O   | 0.161126 | 0.759111 | -2.43368 |
| C   | -0.47592 | -1.27308 | 2.452632 | C   | 0.407833 | -1.57328 | -2.35051 |
| C   | -5.44402 | 0.655668 | 0.801664 | C   | 5.320716 | 0.728912 | -1.29731 |
| O   | 0.421371 | -1.26304 | -1.93618 | O   | -0.33074 | -0.96862 | 2.010361 |
| C   | -5.67735 | 2.148455 | 0.48477  | C   | 6.373093 | -0.3951  | -1.41348 |
| C   | 2.334963 | 3.525572 | -1.72999 | C   | -2.34734 | 3.700952 | 1.238614 |
| C   | 4.727653 | 3.679701 | -0.89955 | C   | -4.78275 | 3.703962 | 0.526629 |
| C   | -5.61761 | 0.386953 | 2.306205 | C   | 5.930656 | 2.074309 | -0.85063 |
| H   | 0.875762 | 0.773138 | 0.021372 | H   | -0.91727 | 0.773851 | -0.18768 |
| C   | -2.43576 | -1.1472  | -3.00057 | C   | 2.557282 | -0.555   | 2.939981 |
| C   | -5.06988 | -0.38296 | -2.03068 | C   | 5.176767 | 0.131555 | 1.694361 |
| O   | -6.16703 | 0.140551 | -1.91812 | O   | 5.232297 | 0.036098 | 2.909394 |
| H   | 2.813005 | 2.75431  | 2.002381 | H   | -2.98063 | 2.424455 | -2.32361 |
| H   | 3.258145 | 0.776803 | 3.265767 | H   | -3.42526 | 0.284789 | -3.28626 |

|   |          |          |          |   |          |          |          |
|---|----------|----------|----------|---|----------|----------|----------|
| H | 4.09473  | 0.994269 | -1.59438 | H | -4.06959 | 1.147281 | 1.5309   |
| H | 3.233145 | -3.79535 | -1.12477 | H | -3.10202 | -3.64359 | 1.679417 |
| H | 2.964047 | 4.055258 | 0.249679 | H | -3.09013 | 3.949437 | -0.75718 |
| H | 3.849761 | -2.42008 | 2.246255 | H | -3.88676 | -2.7571  | -1.828   |
| H | 2.24433  | -2.47982 | 2.94205  | H | -2.30575 | -2.87471 | -2.5698  |
| H | 3.500384 | -1.4525  | 3.686977 | H | -3.61437 | -1.98549 | -3.39734 |
| H | 4.317133 | -0.96783 | -3.13119 | H | -4.17122 | -0.59725 | 3.334015 |
| H | 4.961152 | -2.54438 | -2.64331 | H | -4.80533 | -2.23222 | 3.083668 |
| H | 5.572546 | -1.0534  | -1.89613 | H | -5.47469 | -0.85973 | 2.175753 |
| H | -3.06042 | 0.614192 | 2.105165 | H | 2.933857 | 0.441937 | -2.38879 |
| H | -0.29553 | 1.806529 | 1.586848 | H | 0.120038 | 1.590904 | -1.94211 |
| H | 0.377664 | -1.18031 | 3.125738 | H | -0.47538 | -1.61134 | -2.9896  |
| H | -0.4439  | -2.25031 | 1.971846 | H | 0.435725 | -2.46906 | -1.73119 |
| H | -1.38722 | -1.18028 | 3.049446 | H | 1.28946  | -1.53799 | -2.99642 |
| H | -6.22005 | 0.099782 | 0.273258 | H | 4.976194 | 0.900124 | -2.32384 |
| H | -5.65722 | 2.32635  | -0.5922  | H | 5.913616 | -1.32206 | -1.76959 |
| H | -4.91429 | 2.774379 | 0.961413 | H | 6.877048 | -0.61523 | -0.46886 |
| H | -6.65665 | 2.463589 | 0.860225 | H | 7.143459 | -0.1024  | -2.13483 |
| H | 1.289803 | 3.350174 | -1.45477 | H | -1.31435 | 3.504723 | 0.933134 |
| H | 2.584434 | 2.832176 | -2.54035 | H | -2.53954 | 3.119726 | 2.146938 |
| H | 2.412307 | 4.54348  | -2.12695 | H | -2.42583 | 4.762015 | 1.498883 |
| H | 5.10426  | 3.029304 | -1.69661 | H | -5.10035 | 3.163394 | 1.424906 |
| H | 5.393668 | 3.575081 | -0.03783 | H | -5.49074 | 3.470942 | -0.27438 |
| H | 4.796778 | 4.710942 | -1.26201 | H | -4.85777 | 4.773941 | 0.748191 |
| H | -4.98786 | 1.033557 | 2.92652  | H | 6.405422 | 2.029253 | 0.132653 |
| H | -5.39216 | -0.65301 | 2.562964 | H | 5.165931 | 2.856384 | -0.8162  |
| H | -6.6558  | 0.585467 | 2.590842 | H | 6.696441 | 2.38578  | -1.5691  |
| H | -2.81085 | -0.43242 | -3.73936 | H | 2.843598 | 0.321653 | 3.527473 |
| H | -2.95235 | -2.09769 | -3.17626 | H | 3.240436 | -1.34722 | 3.258142 |
| H | -1.37474 | -1.31073 | -3.17951 | H | 1.532774 | -0.83832 | 3.170361 |
| H | -4.87319 | -1.02192 | -2.91151 | H | 6.112076 | 0.280224 | 1.130991 |

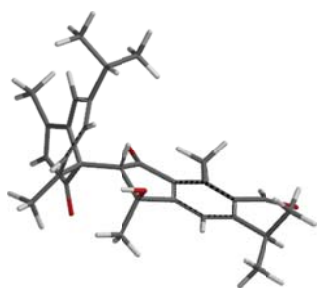

**4b1 (34.3%,  $[\alpha]_D = -278.5$ )**

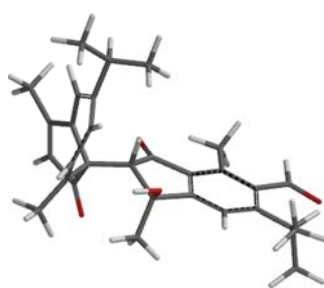

**4b2 (15.7%,  $[\alpha]_D = -513.1$ )**

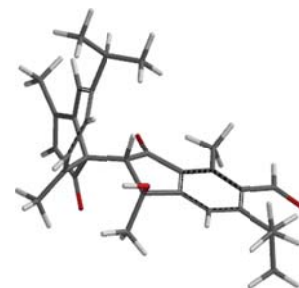

**4b3 (15.6%,  $[\alpha]_D = -513.5$ )**

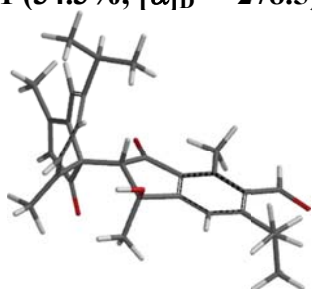

**4b4 (15.6%,  $[\alpha]_D = -513.3$ )**

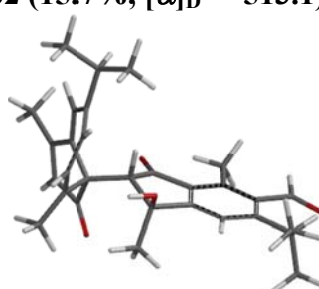

**4b5 (14.3%,  $[\alpha]_D = -457.7$ )**

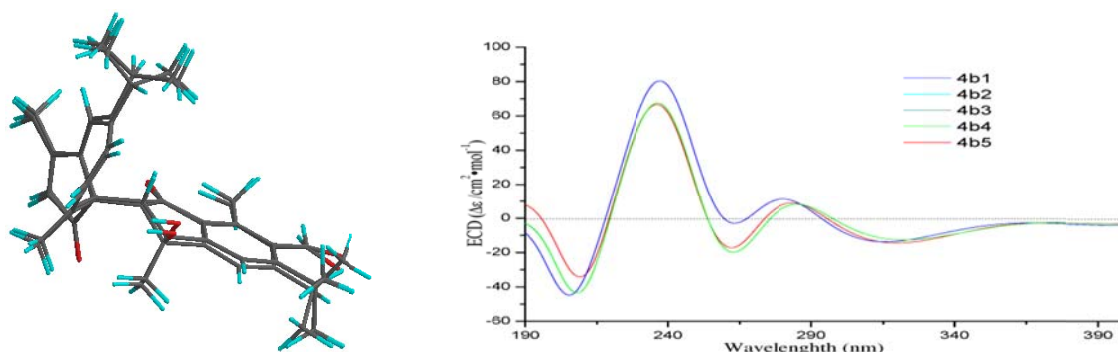

**Figure S7.** Structural candidates of compound **4b** with **10R,1'S,2'S** absolute configuration, and the optical rotation and overlaid ECD calculated on Gaussian program.

**Table S12.** Important thermodynamic parameters (a.u.) of the optimized **4b** with **10R,1'S,2'S** absolute configuration at B3LYP/6-31G(d,p) level in the gas phase

| conformations | E+ZPE        | G            |
|---------------|--------------|--------------|
| <b>4b1</b>    | -1464.011839 | -1464.075662 |
| <b>4b2</b>    | -1464.010444 | -1464.074926 |
| <b>4b3</b>    | -1464.010444 | -1464.074922 |
| <b>4b4</b>    | -1464.010443 | -1464.074921 |
| <b>4b5</b>    | -1464.010432 | -1464.074838 |

**Table S13.** Optimized Z-Matrixes of compound **4** with **10R,1'S,2'S** absolute configuration in the Gas Phase (Å) at B3LYP/6-31g(d,p) level.

| 4b1 |          |          | 4b2      |   |          | 4b3      |          |   |          |          |          |
|-----|----------|----------|----------|---|----------|----------|----------|---|----------|----------|----------|
| C   | -3.11763 | 1.96959  | 0.111572 | C | -3.24211 | 1.704692 | -0.64394 | C | -3.24239 | 1.704455 | -0.64419 |
| C   | -2.87266 | 1.839355 | 1.456079 | C | -3.0147  | 2.041176 | 0.668557 | C | -3.01486 | 2.041126 | 0.668248 |
| C   | -2.92521 | 0.63162  | 2.242391 | C | -3.01415 | 1.159388 | 1.807344 | C | -3.01422 | 1.159501 | 1.807154 |
| C   | -2.69235 | -0.65184 | 1.848615 | C | -2.70995 | -0.16889 | 1.858468 | C | -2.71007 | -0.16878 | 1.858397 |
| C   | -2.05309 | -0.95193 | 0.484839 | C | -2.03326 | -0.86777 | 0.671547 | C | -2.03327 | -0.86768 | 0.671532 |
| C   | -3.08202 | -0.45732 | -0.52482 | C | -3.07282 | -0.79139 | -0.43979 | C | -3.07297 | -0.79157 | -0.43965 |
| C   | -3.44467 | 0.839706 | -0.72282 | C | -3.49391 | 0.348602 | -1.05583 | C | -3.49415 | 0.348303 | -1.05588 |
| C   | -2.0289  | -2.48454 | 0.177706 | C | -1.92415 | -2.41207 | 0.888292 | C | -1.92397 | -2.41194 | 0.888485 |
| C   | -3.0615  | -2.75664 | -0.82228 | C | -2.92663 | -3.05463 | 0.038021 | C | -2.92668 | -3.05471 | 0.038623 |
| C   | -3.63337 | -1.6042  | -1.25066 | C | -3.55227 | -2.14076 | -0.74486 | C | -3.55247 | -2.14102 | -0.74434 |
| C   | -3.21234 | 3.367154 | -0.49813 | C | -3.42516 | 2.802409 | -1.69718 | C | -3.42541 | 2.802068 | -1.69754 |
| C   | -3.10916 | -1.80449 | 2.722544 | C | -3.08449 | -0.99039 | 3.062905 | C | -3.08451 | -0.9902  | 3.062908 |
| C   | -4.68134 | -1.48133 | -2.31212 | C | -4.58998 | -2.43142 | -1.78352 | C | -4.59043 | -2.43181 | -1.7827  |
| O   | -1.27757 | -3.29932 | 0.690649 | O | -1.13902 | -2.9688  | 1.639764 | O | -1.13853 | -2.96849 | 1.639751 |
| C   | 0.109871 | -0.81223 | -0.951   | C | 0.143752 | -1.09031 | -0.73476 | C | 0.143646 | -1.09021 | -0.73475 |
| C   | -0.65179 | -0.2901  | 0.279707 | C | -0.66657 | -0.23478 | 0.254062 | C | -0.66672 | -0.23454 | 0.253945 |
| C   | 0.428045 | -0.19222 | 1.416935 | C | 0.386096 | 0.296527 | 1.291843 | C | 0.385914 | 0.29721  | 1.291494 |
| C   | 1.718453 | -0.14289 | 0.611882 | C | 1.684074 | 0.157218 | 0.510268 | C | 1.683937 | 0.157501 | 0.510076 |
| C   | 1.55494  | -0.57088 | -0.70728 | C | 1.567851 | -0.69138 | -0.59282 | C | 1.567759 | -0.69137 | -0.59279 |
| C   | 2.959803 | 0.246899 | 1.089872 | C | 2.890587 | 0.763338 | 0.823365 | C | 2.890477 | 0.76361  | 0.823167 |
| C   | 4.08298  | 0.201883 | 0.256745 | C | 4.032336 | 0.499317 | 0.05896  | C | 4.032296 | 0.499288 | 0.058999 |
| C   | 3.922019 | -0.26364 | -1.08728 | C | 3.924332 | -0.40176 | -1.0482  | C | 3.924375 | -0.4022  | -1.04786 |
| C   | 2.651575 | -0.66229 | -1.58146 | C | 2.681429 | -0.99653 | -1.39411 | C | 2.681458 | -0.99691 | -1.3938  |
| O   | 0.339611 | 1.040851 | 2.133721 | O | 0.213131 | 1.68852  | 1.564947 | O | 0.212946 | 1.689367 | 1.563914 |
| C   | 0.4883   | -1.36574 | 2.408148 | C | 0.498431 | -0.48103 | 2.613538 | C | 0.498115 | -0.47965 | 2.613619 |
| C   | 5.429594 | 0.660891 | 0.811179 | C | 5.348345 | 1.168242 | 0.449928 | C | 5.348338 | 1.168223 | 0.449906 |
| O   | -0.42086 | -1.28396 | -1.94401 | O | -0.34198 | -1.89909 | -1.50942 | O | -0.34215 | -1.899   | -1.50937 |
| C   | 5.600872 | 0.399294 | 2.317205 | C | 6.148146 | 0.251764 | 1.400529 | C | 6.148202 | 0.251787 | 1.400482 |

|                |          |          |          |   |          |          |          |   |          |          |          |
|----------------|----------|----------|----------|---|----------|----------|----------|---|----------|----------|----------|
| C              | -4.65402 | 3.730861 | -0.90447 | C | -2.20511 | 3.73617  | -1.78408 | C | -2.20424 | 3.73426  | -1.78599 |
| C              | -2.24399 | 3.542209 | -1.68221 | C | -4.72273 | 3.602987 | -1.47466 | C | -4.72171 | 3.604371 | -1.47391 |
| C              | 5.653063 | 2.15443  | 0.490222 | C | 5.170949 | 2.566075 | 1.067064 | C | 5.17103  | 2.566108 | 1.066956 |
| H              | -0.83875 | 0.764064 | 0.042073 | H | -0.90646 | 0.668448 | -0.3198  | H | -0.90673 | 0.66849  | -0.32018 |
| C              | 2.438856 | -1.14475 | -3.00329 | C | 2.52009  | -1.94074 | -2.57028 | C | 2.520071 | -1.94137 | -2.56978 |
| C              | 5.068442 | -0.37612 | -2.02362 | C | 5.087896 | -0.73646 | -1.90657 | C | 5.088049 | -0.73748 | -1.90586 |
| O              | 6.168175 | 0.140461 | -1.90258 | O | 6.265132 | -0.52098 | -1.66394 | O | 6.265219 | -0.52117 | -1.66362 |
| H              | -2.77487 | 2.764036 | 2.023316 | H | -2.98432 | 3.103304 | 0.905127 | H | -2.98451 | 3.103294 | 0.904655 |
| H              | -3.26401 | 0.772181 | 3.269518 | H | -3.37301 | 1.611618 | 2.732664 | H | -3.373   | 1.611883 | 2.732435 |
| H              | -4.07884 | 1.046526 | -1.5825  | H | -4.11804 | 0.233806 | -1.94135 | H | -4.11836 | 0.233372 | -1.94132 |
| H              | -3.27812 | -3.75676 | -1.17786 | H | -3.08564 | -4.12621 | 0.033632 | H | -3.08569 | -4.12629 | 0.034468 |
| H              | -2.90929 | 4.074275 | 0.284187 | H | -3.51483 | 2.298242 | -2.66795 | H | -3.51674 | 2.297726 | -2.66806 |
| H              | -3.50996 | -1.45356 | 3.676636 | H | -3.52847 | -0.36966 | 3.845009 | H | -3.52869 | -0.36946 | 3.844895 |
| H              | -2.29023 | -2.50693 | 2.903341 | H | -3.82617 | -1.74985 | 2.778123 | H | -3.82602 | -1.74983 | 2.778134 |
| H              | -3.89726 | -2.38452 | 2.222144 | H | -2.23293 | -1.54331 | 3.470698 | H | -2.23286 | -1.54287 | 3.470868 |
| H              | -5.57216 | -0.96916 | -1.93182 | H | -5.51104 | -1.8702  | -1.59089 | H | -5.51162 | -1.87096 | -1.58957 |
| H              | -4.97871 | -2.46136 | -2.69089 | H | -4.23226 | -2.13306 | -2.77598 | H | -4.2332  | -2.13303 | -2.77521 |
| H              | -4.30478 | -0.89029 | -3.15524 | H | -4.83137 | -3.49587 | -1.81586 | H | -4.83146 | -3.49634 | -1.81525 |
| H              | 3.046914 | 0.593045 | 2.11229  | H | 2.935741 | 1.449557 | 1.659901 | H | 2.935527 | 1.450056 | 1.659517 |
| H              | -0.49128 | 1.012578 | 2.629456 | H | -0.62425 | 1.773588 | 2.043293 | H | -0.62432 | 1.774609 | 2.042424 |
| H              | 0.49489  | -2.32966 | 1.898803 | H | -0.3825  | -0.30131 | 3.235049 | H | -0.38287 | -0.29948 | 3.234929 |
| H              | -0.37855 | -1.34513 | 3.073674 | H | 1.374287 | -0.12327 | 3.161654 | H | 1.373945 | -0.12166 | 3.161624 |
| H              | 1.385933 | -1.26459 | 3.024228 | H | 0.577737 | -1.55615 | 2.450382 | H | 0.577368 | -1.55486 | 2.451011 |
| H              | 6.210844 | 0.108359 | 0.286853 | H | 5.947138 | 1.277981 | -0.45549 | H | 5.947057 | 1.277892 | -0.45557 |
| H              | 5.380722 | -0.64093 | 2.578005 | H | 5.593849 | 0.070999 | 2.328475 | H | 5.594014 | 0.071124 | 2.328515 |
| H              | 4.965904 | 1.045358 | 2.93272  | H | 6.364805 | -0.70806 | 0.927752 | H | 6.364755 | -0.70811 | 0.927781 |
| H              | 6.637281 | 0.604726 | 2.603568 | H | 7.102242 | 0.722226 | 1.661048 | H | 7.102355 | 0.72222  | 1.660836 |
| H              | -5.34198 | 3.629374 | -0.0596  | H | -2.06219 | 4.299585 | -0.85612 | H | -2.05945 | 4.29745  | -0.85818 |
| H              | -5.02177 | 3.094223 | -1.71664 | H | -2.33645 | 4.462048 | -2.5937  | H | -2.33561 | 4.460285 | -2.59547 |
| H              | -4.69896 | 4.766095 | -1.25887 | H | -1.28552 | 3.175191 | -1.97587 | H | -1.28562 | 3.172071 | -1.9789  |
| H              | -2.48571 | 2.855201 | -2.50055 | H | -4.87276 | 4.330014 | -2.2802  | H | -4.87165 | 4.331303 | -2.27955 |
| H              | -1.20958 | 3.350869 | -1.38047 | H | -4.68878 | 4.154479 | -0.52889 | H | -4.68608 | 4.156193 | -0.52839 |
| H              | -2.29812 | 4.562469 | -2.07683 | H | -5.59711 | 2.945036 | -1.44437 | H | -5.59689 | 2.947546 | -1.44247 |
| H              | 4.882578 | 2.775531 | 0.960701 | H | 4.729146 | 2.532664 | 2.068623 | H | 4.729399 | 2.532807 | 2.068591 |
| H              | 5.636218 | 2.328433 | -0.58741 | H | 6.151276 | 3.042792 | 1.167008 | H | 6.151376 | 3.042831 | 1.166689 |
| H              | 6.628541 | 2.477992 | 0.868716 | H | 4.544755 | 3.211219 | 0.442743 | H | 4.544734 | 3.21118  | 0.442665 |
| H              | 2.961484 | -2.0908  | -3.18498 | H | 3.188296 | -2.80355 | -2.4866  | H | 3.188333 | -2.80412 | -2.48608 |
| H              | 2.809421 | -0.42294 | -3.73751 | H | 2.74721  | -1.44507 | -3.5207  | H | 2.746989 | -1.4458  | -3.52031 |
| H              | 1.378952 | -1.31368 | -3.18399 | H | 1.496091 | -2.30673 | -2.61427 | H | 1.496077 | -2.30739 | -2.6136  |
| H              | 4.871554 | -1.00378 | -2.91255 | H | 4.825376 | -1.23358 | -2.8585  | H | 4.825683 | -1.23605 | -2.85704 |
| <b>4b4 4b5</b> |          |          |          |   |          |          |          |   |          |          |          |
| C              | -3.24276 | 1.70431  | -0.64413 | C | -3.22834 | 1.698565 | -0.62251 |   |          |          |          |
| C              | -3.01523 | 2.041043 | 0.668288 | C | -2.99498 | 2.041876 | 0.685659 |   |          |          |          |
| C              | -3.01431 | 1.15945  | 1.807226 | C | -2.98833 | 1.162758 | 1.828736 |   |          |          |          |
| C              | -2.70991 | -0.16878 | 1.858504 | C | -2.67708 | -0.16265 | 1.88513  |   |          |          |          |
| C              | -2.03321 | -0.86772 | 0.671613 | C | -2.00963 | -0.86539 | 0.694681 |   |          |          |          |
| C              | -3.07289 | -0.79172 | -0.43961 | C | -3.05576 | -0.79745 | -0.41142 |   |          |          |          |
| C              | -3.49429 | 0.348101 | -1.05578 | C | -3.48614 | 0.338676 | -1.0253  |   |          |          |          |
| C              | -1.92375 | -2.41198 | 0.888576 | C | -1.89341 | -2.40813 | 0.917003 |   |          |          |          |
| C              | -2.92624 | -3.05485 | 0.038546 | C | -2.89678 | -3.05837 | 0.073281 |   |          |          |          |
| C              | -3.55214 | -2.14122 | -0.74441 | C | -3.52956 | -2.15049 | -0.71054 |   |          |          |          |
| C              | -3.42598 | 2.801857 | -1.6975  | C | -3.43367 | 2.772558 | -1.69532 |   |          |          |          |
| C              | -3.08415 | -0.99013 | 3.063144 | C | -3.03615 | -0.97903 | 3.097996 |   |          |          |          |
| C              | -4.59005 | -2.43217 | -1.78279 | C | -4.56976 | -2.44916 | -1.74435 |   |          |          |          |
| O              | -1.1384  | -2.96843 | 1.640016 | O | -1.10225 | -2.95855 | 1.6668   |   |          |          |          |

|   |          |          |          |   |          |          |          |
|---|----------|----------|----------|---|----------|----------|----------|
| C | 0.143704 | -1.09015 | -0.73476 | C | 0.158736 | -1.09049 | -0.72689 |
| C | -0.6667  | -0.23451 | 0.25388  | C | -0.64764 | -0.23088 | 0.261758 |
| C | 0.385924 | 0.297328 | 1.291433 | C | 0.410399 | 0.313235 | 1.286921 |
| C | 1.683934 | 0.157768 | 0.509955 | C | 1.703574 | 0.171256 | 0.497983 |
| C | 1.567772 | -0.69109 | -0.59293 | C | 1.582507 | -0.68595 | -0.59778 |
| C | 2.89048  | 0.763821 | 0.823125 | C | 2.910547 | 0.782603 | 0.799097 |
| C | 4.032325 | 0.499443 | 0.059007 | C | 4.048244 | 0.515462 | 0.029841 |
| C | 3.924357 | -0.40184 | -1.048   | C | 3.93527  | -0.39333 | -1.07056 |
| C | 2.681467 | -0.99657 | -1.39394 | C | 2.691733 | -0.99376 | -1.40415 |
| O | 0.21285  | 1.689414 | 1.563969 | O | 0.234181 | 1.707229 | 1.548202 |
| C | 0.498271 | -0.47967 | 2.613481 | C | 0.534602 | -0.45196 | 2.614793 |
| C | 5.348439 | 1.168088 | 0.450083 | C | 5.365506 | 1.188767 | 0.408867 |
| O | -0.34199 | -1.89911 | -1.50927 | O | -0.32957 | -1.90571 | -1.49314 |
| C | 6.148138 | 0.251229 | 1.400422 | C | 6.173954 | 0.277588 | 1.35731  |
| C | -2.20478 | 3.734003 | -1.78618 | C | -2.51305 | 3.992238 | -1.5377  |
| C | -4.72223 | 3.604187 | -1.47373 | C | -4.91236 | 3.206045 | -1.7646  |
| C | 5.171338 | 2.565791 | 1.067585 | C | 5.189717 | 2.588443 | 1.022191 |
| H | -0.90686 | 0.668474 | -0.32026 | H | -0.89528 | 0.666535 | -0.31783 |
| C | 2.520209 | -1.94103 | -2.56993 | C | 2.525247 | -1.9464  | -2.57281 |
| C | 5.08789  | -0.73658 | -1.90637 | C | 5.093779 | -0.73015 | -1.93491 |
| O | 6.265129 | -0.52085 | -1.66392 | O | 6.271927 | -0.50781 | -1.70308 |
| H | -2.9851  | 3.103223 | 0.904673 | H | -2.95615 | 3.10341  | 0.918953 |
| H | -3.37305 | 1.611782 | 2.732541 | H | -3.34431 | 1.618366 | 2.753513 |
| H | -4.11852 | 0.233042 | -1.94119 | H | -4.11567 | 0.219988 | -1.9067  |
| H | -3.08505 | -4.12646 | 0.034343 | H | -3.05062 | -4.13072 | 0.073186 |
| H | -3.51747 | 2.297465 | -2.66799 | H | -3.18447 | 2.30435  | -2.65705 |
| H | -3.52817 | -0.36933 | 3.845177 | H | -3.47424 | -0.35524 | 3.881021 |
| H | -3.82575 | -1.74974 | 2.778544 | H | -3.7781  | -1.74259 | 2.825294 |
| H | -2.23246 | -1.54282 | 3.470948 | H | -2.17858 | -1.52641 | 3.500398 |
| H | -5.51177 | -1.87242 | -1.58892 | H | -5.49297 | -1.89223 | -1.54937 |
| H | -4.23343 | -2.13219 | -2.77514 | H | -4.21747 | -2.15124 | -2.73889 |
| H | -4.83002 | -3.49691 | -1.81613 | H | -4.80586 | -3.5149  | -1.77329 |
| H | 2.935563 | 1.450226 | 1.65951  | H | 2.959155 | 1.474941 | 1.630385 |
| H | -0.62475 | 1.774626 | 2.041904 | H | -0.60033 | 1.793267 | 2.031461 |
| H | -0.38265 | -0.29957 | 3.234886 | H | -0.34131 | -0.26725 | 3.241775 |
| H | 1.374128 | -0.12167 | 3.161434 | H | 1.414562 | -0.08853 | 3.152452 |
| H | 0.577561 | -1.55486 | 2.45076  | H | 0.613849 | -1.52846 | 2.460461 |
| H | 5.947209 | 1.277918 | -0.45534 | H | 5.957633 | 1.296277 | -0.50123 |
| H | 5.593853 | 0.07035  | 2.32835  | H | 5.626754 | 0.099668 | 2.290006 |
| H | 6.364606 | -0.70853 | 0.927409 | H | 6.389052 | -0.6838  | 0.887019 |
| H | 7.102331 | 0.721465 | 1.660996 | H | 7.129024 | 0.750897 | 1.608957 |
| H | -2.05989 | 4.297287 | -0.85844 | H | -2.77324 | 4.591855 | -0.65883 |
| H | -2.33621 | 4.459961 | -2.59572 | H | -2.60537 | 4.647    | -2.41026 |
| H | -1.28621 | 3.171758 | -1.97912 | H | -1.46444 | 3.695268 | -1.44236 |
| H | -4.87226 | 4.331075 | -2.2794  | H | -5.07307 | 3.911389 | -2.58716 |
| H | -4.6865  | 4.156074 | -0.52826 | H | -5.21406 | 3.69622  | -0.83256 |
| H | -5.59742 | 2.947371 | -1.44216 | H | -5.57767 | 2.350672 | -1.92025 |
| H | 4.729613 | 2.53219  | 2.069173 | H | 4.755333 | 2.55764  | 2.027085 |
| H | 6.151754 | 3.042311 | 1.167578 | H | 6.169759 | 3.067495 | 1.113295 |
| H | 4.54521  | 3.211214 | 0.443486 | H | 4.557657 | 3.230098 | 0.400194 |
| H | 3.189018 | -2.80338 | -2.48658 | H | 3.197706 | -2.80584 | -2.48895 |
| H | 2.746519 | -1.4452  | -3.52049 | H | 2.742733 | -1.45578 | -3.52812 |
| H | 1.496399 | -2.3076  | -2.61346 | H | 1.502431 | -2.31676 | -2.60651 |
| H | 4.825345 | -1.23393 | -2.85816 | H | 4.826124 | -1.2359  | -2.88082 |

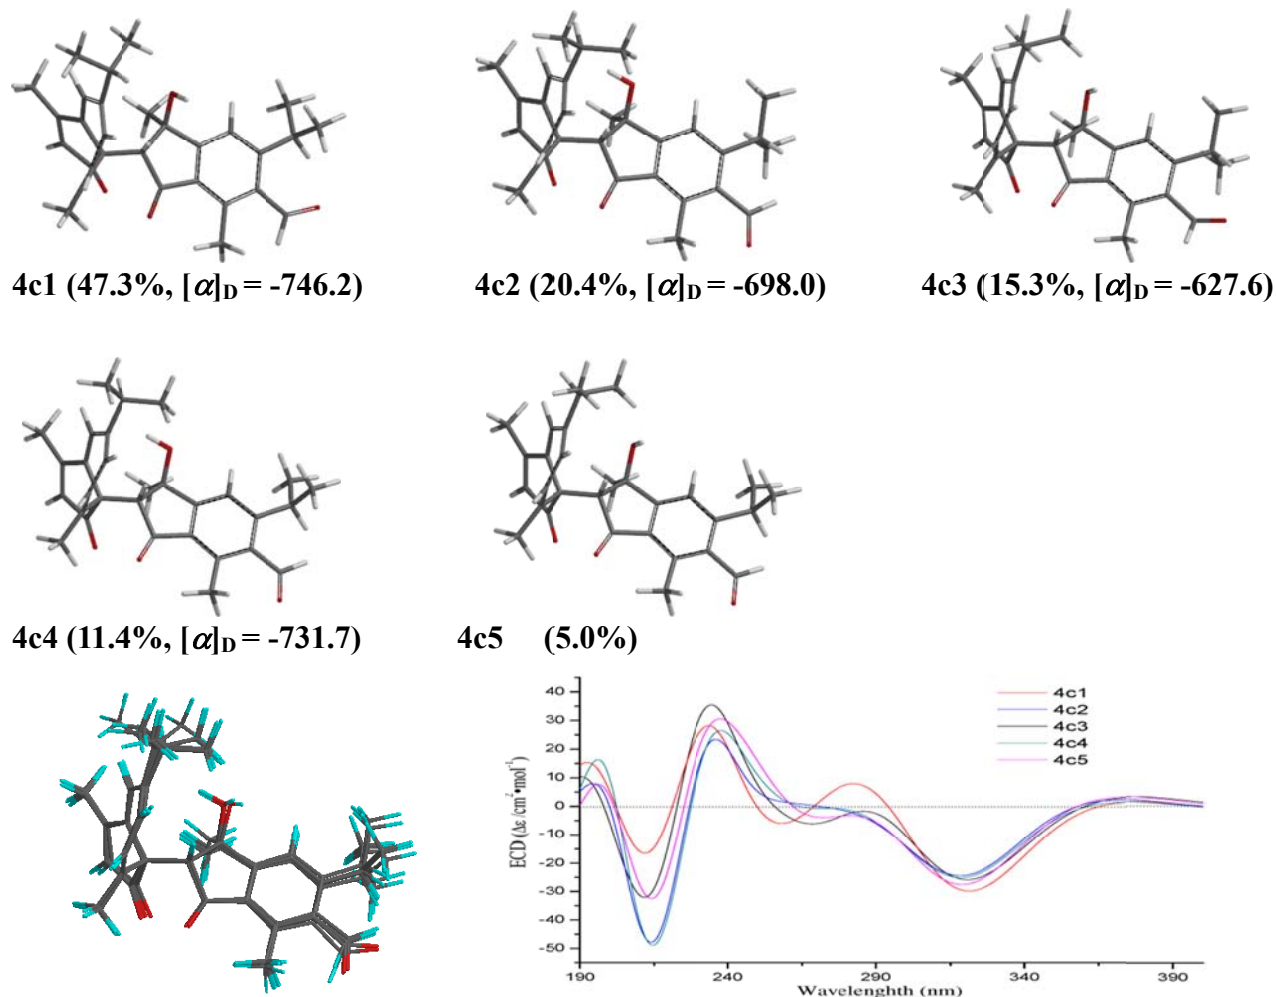

**Figure S8.** Structural candidates of compound **4** with  $10R,1'R,2'R$  absolute configuration, and the optical rotation and overlaid ECD calculated on Gaussian program.

**Table S14.** Important thermodynamic parameters (a.u.) of the optimized **4c** with  $10R,1'R,2'R$  absolute configuration at B3LYP/6-31G(d,p) level in the gas phase

| conformations | E+ZPE        | G            |
|---------------|--------------|--------------|
| <b>4c1</b>    | -1464.009853 | -1464.073922 |
| <b>4c2</b>    | -1464.009104 | -1464.073130 |
| <b>4c3</b>    | -1464.009638 | -1464.072855 |
| <b>4c4</b>    | -1464.009061 | -1464.072587 |
| <b>4c5</b>    | -1464.007597 | -1464.071804 |

**Table S15.** Optimized Z-Matrixes of compound **4c** with  $10R,1'R,2'R$  absolute configuration in the Gas Phase (Å) at B3LYP/6-31g(d,p) level.

| 4c1 |          |          | 4c2      |   |          | 4c3      |          |   |          |          |          |
|-----|----------|----------|----------|---|----------|----------|----------|---|----------|----------|----------|
| C   | 3.369424 | 1.29254  | -1.21928 | C | 3.193931 | 1.617664 | -0.89313 | C | 3.339021 | 1.592292 | -0.89699 |
| C   | 3.119537 | 0.350662 | -2.18993 | C | 3.011047 | 0.824215 | -2.00086 | C | 3.147622 | 0.801057 | -2.00417 |
| C   | 3.01911  | -1.07596 | -2.03239 | C | 3.026655 | -0.61112 | -2.07912 | C | 3.11527  | -0.63674 | -2.06856 |
| C   | 2.613992 | -1.79357 | -0.94892 | C | 2.709817 | -1.5323  | -1.12721 | C | 2.756505 | -1.54139 | -1.11741 |
| C   | 1.94055  | -1.08364 | 0.238298 | C | 2.034856 | -1.09555 | 0.183071 | C | 2.062292 | -1.08145 | 0.175685 |
| C   | 3.033274 | -0.17248 | 0.77806  | C | 3.06174  | -0.18517 | 0.845842 | C | 3.089898 | -0.18856 | 0.855497 |
| C   | 3.557061 | 0.920209 | 0.156105 | C | 3.450232 | 1.047144 | 0.402625 | C | 3.53597  | 1.018256 | 0.409991 |
| C   | 1.708101 | -2.05186 | 1.437671 | C | 1.943781 | -2.27108 | 1.204285 | C | 1.920446 | -2.24945 | 1.198949 |
| C   | 2.746469 | -1.77881 | 2.433442 | C | 2.98326  | -2.05644 | 2.217787 | C | 2.926597 | -2.04452 | 2.24378  |

|                |          |          |          |   |          |          |          |   |          |          |          |
|----------------|----------|----------|----------|---|----------|----------|----------|---|----------|----------|----------|
| C              | 3.472854 | -0.68651 | 2.077437 | C | 3.593259 | -0.85606 | 2.034815 | C | 3.563685 | -0.85624 | 2.069659 |
| C              | 3.678986 | 2.730822 | -1.63327 | C | 3.276992 | 3.140219 | -1.02944 | C | 3.527937 | 3.106713 | -1.00168 |
| C              | 2.797718 | -3.2826  | -0.89229 | C | 2.987337 | -2.99137 | -1.34335 | C | 3.017424 | -3.00715 | -1.31381 |
| C              | 4.583956 | -0.07402 | 2.873704 | C | 4.673383 | -0.27682 | 2.896679 | C | 4.619403 | -0.28708 | 2.96718  |
| O              | 0.791392 | -2.85336 | 1.527178 | O | 1.130625 | -3.17887 | 1.169682 | O | 1.091663 | -3.14341 | 1.137824 |
| C              | -0.43757 | -1.42279 | -0.74791 | C | -0.37634 | -1.34936 | -0.81801 | C | -0.30901 | -1.32823 | -0.89914 |
| C              | 0.608427 | -0.41371 | -0.21544 | C | 0.65195  | -0.4471  | -0.10233 | C | 0.689571 | -0.42122 | -0.14288 |
| C              | -0.18778 | 0.568576 | 0.715673 | C | -0.15862 | 0.280111 | 1.019713 | C | -0.16694 | 0.295324 | 0.961561 |
| C              | -1.6366  | 0.276152 | 0.341532 | C | -1.57395 | 0.203734 | 0.47258  | C | -1.57629 | 0.165044 | 0.394428 |
| C              | -1.7863  | -0.88675 | -0.41505 | C | -1.72312 | -0.7896  | -0.49771 | C | -1.67508 | -0.81707 | -0.59315 |
| C              | -2.73271 | 1.052562 | 0.690585 | C | -2.64651 | 0.982407 | 0.878277 | C | -2.68363 | 0.899818 | 0.79053  |
| C              | -4.0225  | 0.667139 | 0.309772 | C | -3.91437 | 0.755235 | 0.336462 | C | -3.94119 | 0.635946 | 0.236004 |
| C              | -4.18067 | -0.5439  | -0.4358  | C | -4.08572 | -0.2947  | -0.62056 | C | -4.05256 | -0.3994  | -0.74573 |
| C              | -3.06057 | -1.3353  | -0.80608 | C | -2.98019 | -1.07557 | -1.06351 | C | -2.91272 | -1.12835 | -1.18204 |
| O              | 0.131849 | 1.944055 | 0.459648 | O | 0.193957 | 1.663367 | 1.136698 | O | 0.197136 | 1.664043 | 1.154712 |
| C              | 0.000997 | 0.402149 | 2.22642  | C | -0.13136 | -0.37037 | 2.414592 | C | -0.1328  | -0.31812 | 2.366437 |
| C              | -5.20258 | 1.558192 | 0.691078 | C | -5.08144 | 1.622476 | 0.824956 | C | -5.14236 | 1.447927 | 0.715972 |
| O              | -0.17821 | -2.40751 | -1.41634 | O | -0.10361 | -2.26658 | -1.5696  | O | -0.00614 | -2.21692 | -1.67453 |
| C              | -5.52077 | 2.53695  | -0.45952 | C | -5.82137 | 0.928321 | 1.988288 | C | -4.79349 | 2.894405 | 1.106163 |
| C              | 5.198352 | 2.972409 | -1.73754 | C | 4.339988 | 3.60729  | -2.03924 | C | 2.28223  | 3.850723 | -0.47615 |
| C              | 3.022506 | 3.771277 | -0.70917 | C | 1.893815 | 3.737211 | -1.35679 | C | 3.914094 | 3.623342 | -2.39339 |
| C              | -5.00336 | 2.320904 | 2.011726 | C | -4.66734 | 3.048028 | 1.23079  | C | -5.84158 | 0.722818 | 1.885665 |
| H              | 0.863524 | 0.187977 | -1.09694 | H | 0.830629 | 0.350764 | -0.83365 | H | 0.904951 | 0.370895 | -0.87346 |
| C              | -3.19433 | -2.61153 | -1.61384 | C | -3.11097 | -2.16776 | -2.09468 | C | -2.99019 | -2.22124 | -2.23069 |
| C              | -5.51861 | -1.04959 | -0.83687 | C | -5.44752 | -0.57203 | -1.14393 | C | -5.35047 | -0.74562 | -1.37885 |
| O              | -6.56215 | -0.41651 | -0.86417 | O | -5.7416  | -1.39942 | -1.99115 | O | -6.46246 | -0.41473 | -0.99814 |
| H              | 3.14732  | 0.70262  | -3.22138 | H | 2.977816 | 1.331939 | -2.96337 | H | 3.165744 | 1.295023 | -2.97214 |
| H              | 3.331292 | -1.65239 | -2.90238 | H | 3.348395 | -1.00899 | -3.04065 | H | 3.452567 | -1.05111 | -3.01787 |
| H              | 4.228842 | 1.548276 | 0.738788 | H | 4.085162 | 1.639221 | 1.062449 | H | 4.162404 | 1.596583 | 1.08864  |
| H              | 2.862918 | -2.36454 | 3.337513 | H | 3.18881  | -2.77021 | 3.006805 | H | 3.090013 | -2.75156 | 3.048475 |
| H              | 3.25903  | 2.864566 | -2.63882 | H | 3.572594 | 3.529293 | -0.0456  | H | 4.356272 | 3.357284 | -0.3223  |
| H              | 1.837611 | -3.78729 | -0.75616 | H | 2.062996 | -3.57018 | -1.26697 | H | 2.087918 | -3.57738 | -1.24146 |
| H              | 3.431989 | -3.55838 | -0.0381  | H | 3.448963 | -3.16436 | -2.31829 | H | 3.689983 | -3.38598 | -0.53152 |
| H              | 3.278182 | -3.65447 | -1.80046 | H | 3.671621 | -3.37261 | -0.57251 | H | 3.488625 | -3.19589 | -2.28135 |
| H              | 5.51499  | -0.05786 | 2.296522 | H | 4.363043 | 0.684159 | 3.323808 | H | 5.54953  | -0.11368 | 2.414836 |
| H              | 4.75937  | -0.62519 | 3.79999  | H | 4.927023 | -0.94811 | 3.719725 | H | 4.831905 | -0.95632 | 3.803482 |
| H              | 4.351425 | 0.965477 | 3.133164 | H | 5.579281 | -0.08649 | 2.310708 | H | 4.304599 | 0.680832 | 3.374437 |
| H              | -2.57781 | 1.962673 | 1.258119 | H | -2.48303 | 1.77118  | 1.601963 | H | -2.5612  | 1.681441 | 1.531138 |
| H              | -0.11669 | 2.137501 | -0.45492 | H | 1.116147 | 1.693405 | 1.42951  | H | 0.116498 | 2.121285 | 0.30648  |
| H              | 1.025702 | 0.645589 | 2.510858 | H | -0.43541 | -1.41847 | 2.37861  | H | 0.859402 | -0.20808 | 2.806974 |
| H              | -0.23543 | -0.61322 | 2.546978 | H | 0.868481 | -0.31862 | 2.854611 | H | -0.40264 | -1.37466 | 2.346211 |
| H              | -0.66727 | 1.096261 | 2.742274 | H | -0.81759 | 0.173819 | 3.068858 | H | -0.84575 | 0.217143 | 2.998861 |
| H              | -6.0783  | 0.917428 | 0.806413 | H | -5.79056 | 1.743441 | 0.000999 | H | -5.86328 | 1.488929 | -0.10183 |
| H              | -5.76602 | 1.9956   | -1.37517 | H | -5.14871 | 0.789667 | 2.841414 | H | -4.23444 | 3.406569 | 0.316349 |
| H              | -4.67035 | 3.199637 | -0.65702 | H | -6.67018 | 1.535309 | 2.320659 | H | -4.20777 | 2.953897 | 2.029624 |
| H              | -6.38157 | 3.160241 | -0.19518 | H | -6.1995  | -0.0574  | 1.701588 | H | -5.71804 | 3.454217 | 1.27928  |
| H              | 5.661833 | 2.279939 | -2.44658 | H | 4.408679 | 4.700395 | -2.04398 | H | 2.003913 | 3.508998 | 0.524528 |
| H              | 5.689783 | 2.836742 | -0.76728 | H | 4.094048 | 3.291225 | -3.05843 | H | 1.429412 | 3.683439 | -1.14672 |
| H              | 5.405863 | 3.995039 | -2.07141 | H | 5.328072 | 3.205102 | -1.79423 | H | 2.460102 | 4.930723 | -0.43435 |
| H              | 3.492866 | 3.780192 | 0.280309 | H | 1.565244 | 3.431457 | -2.35646 | H | 3.103194 | 3.488651 | -3.11791 |
| H              | 1.961238 | 3.560963 | -0.55584 | H | 1.138046 | 3.400363 | -0.64144 | H | 4.802888 | 3.116615 | -2.78148 |
| H              | 3.126477 | 4.777381 | -1.12898 | H | 1.930719 | 4.832076 | -1.33902 | H | 4.128991 | 4.695618 | -2.34737 |
| H              | -4.25175 | 3.113682 | 1.932661 | H | -5.56396 | 3.650765 | 1.406295 | H | -5.16576 | 0.617729 | 2.741902 |
| H              | -4.70813 | 1.653241 | 2.827429 | H | -4.08347 | 3.064872 | 2.156382 | H | -6.18166 | -0.26906 | 1.582204 |
| H              | -5.94447 | 2.802151 | 2.295861 | H | -4.07833 | 3.536219 | 0.448839 | H | -6.71684 | 1.294518 | 2.211924 |
| H              | -3.76557 | -2.45327 | -2.53339 | H | -3.82442 | -2.92729 | -1.76281 | H | -3.32183 | -1.82947 | -3.19884 |
| H              | -3.70889 | -3.39077 | -1.03983 | H | -2.14382 | -2.629   | -2.2806  | H | -3.69479 | -3.00614 | -1.93889 |
| H              | -2.20824 | -2.98897 | -1.87672 | H | -3.52444 | -1.77565 | -3.02772 | H | -2.01026 | -2.67401 | -2.36729 |
| H              | -5.53461 | -2.11539 | -1.13018 | H | -6.25677 | 0.03468  | -0.69794 | H | -5.26426 | -1.37024 | -2.28664 |
| <b>4c4 4c5</b> |          |          |          |   |          |          |          |   |          |          |          |
| C              | 3.092745 | 1.70927  | -0.90607 | C | 3.215131 | 1.60207  | -1.05471 |   |          |          |          |
| C              | 2.902897 | 0.939596 | -2.02937 | C | 2.976748 | 0.769595 | -2.1217  |   |          |          |          |
| C              | 2.967504 | -0.4916  | -2.14806 | C | 2.97269  | -0.66984 | -2.13625 |   |          |          |          |
| C              | 2.714454 | -1.44895 | -1.21275 | C | 2.690208 | -1.54882 | -1.13652 |   |          |          |          |



|   |          |          |          |   |          |          |          |
|---|----------|----------|----------|---|----------|----------|----------|
| C | 2.067622 | -1.07225 | 0.130028 | C | 2.063552 | -1.05973 | 0.180243 |
| C | 3.084145 | -0.14404 | 0.784236 | C | 3.108922 | -0.12206 | 0.76798  |
| C | 3.412523 | 1.113641 | 0.364039 | C | 3.500863 | 1.077401 | 0.256598 |
| C | 2.051897 | -2.27744 | 1.119982 | C | 2.009862 | -2.19529 | 1.247602 |
| C | 3.117726 | -2.05372 | 2.103871 | C | 3.069959 | -1.93229 | 2.224061 |
| C | 3.679138 | -0.82789 | 1.935056 | C | 3.667318 | -0.73712 | 1.973947 |
| C | 3.115034 | 3.237017 | -1.00216 | C | 3.362099 | 3.1158   | -1.21974 |
| C | 3.036071 | -2.89069 | -1.47859 | C | 2.971347 | -3.01471 | -1.30076 |
| C | 4.768042 | -0.23459 | 2.775978 | C | 4.758717 | -0.11384 | 2.788897 |
| O | 1.26965  | -3.21194 | 1.08695  | O | 1.201388 | -3.10925 | 1.265522 |
| C | -0.36694 | -1.38379 | -0.79631 | C | -0.36204 | -1.38409 | -0.75056 |
| C | 0.655067 | -0.46529 | -0.09268 | C | 0.660693 | -0.4376  | -0.07674 |
| C | -0.13892 | 0.206429 | 1.074538 | C | -0.14601 | 0.291224 | 1.054434 |
| C | -1.56971 | 0.093302 | 0.576039 | C | -1.58035 | 0.128396 | 0.563538 |
| C | -1.71963 | -0.8784  | -0.41535 | C | -1.71994 | -0.87612 | -0.39465 |
| C | -2.65508 | 0.812756 | 1.05165  | C | -2.67394 | 0.856309 | 1.009475 |
| C | -3.93365 | 0.55519  | 0.550638 | C | -3.94929 | 0.57129  | 0.515544 |
| C | -4.099   | -0.45319 | -0.45193 | C | -4.1024  | -0.46934 | -0.45595 |
| C | -2.98569 | -1.1909  | -0.94635 | C | -2.98157 | -1.21458 | -0.92176 |
| O | 0.169557 | 1.598456 | 1.212542 | O | 0.20438  | 1.670121 | 1.198512 |
| C | -0.03837 | -0.47495 | 2.451171 | C | -0.02943 | -0.28832 | 2.46918  |
| C | -5.10545 | 1.397847 | 1.0694   | C | -5.13032 | 1.418852 | 1.004603 |
| O | -0.09012 | -2.27099 | -1.58165 | O | -0.08235 | -2.29765 | -1.50349 |
| C | -4.91142 | 1.925222 | 2.501633 | C | -4.94353 | 1.995832 | 2.418484 |
| C | 4.130064 | 3.77076  | -2.0282  | C | 3.63961  | 3.594324 | -2.65031 |
| C | 1.701789 | 3.790221 | -1.27427 | C | 2.138625 | 3.850809 | -0.63278 |
| C | -5.39325 | 2.569388 | 0.105739 | C | -5.42986 | 2.553751 | 0.001508 |
| H | 0.782643 | 0.3547   | -0.81008 | H | 0.816136 | 0.337012 | -0.84083 |
| C | -3.11622 | -2.26239 | -1.99903 | C | -3.1003  | -2.32021 | -1.93987 |
| C | -5.45883 | -0.71467 | -0.98814 | C | -5.4582  | -0.75731 | -0.98979 |
| O | -5.75475 | -1.5392  | -1.83761 | O | -5.74116 | -1.59688 | -1.82863 |
| H | 2.820248 | 1.47119  | -2.97581 | H | 2.926368 | 1.229875 | -3.10504 |
| H | 3.271923 | -0.85155 | -3.12995 | H | 3.262362 | -1.10937 | -3.08994 |
| H | 4.047514 | 1.71075  | 1.019309 | H | 4.153333 | 1.691955 | 0.876563 |
| H | 3.374692 | -2.78125 | 2.864734 | H | 3.296315 | -2.60805 | 3.040289 |
| H | 3.424609 | 3.610558 | -0.01656 | H | 4.229002 | 3.406047 | -0.60747 |
| H | 2.13525  | -3.50433 | -1.39261 | H | 3.693893 | -3.35438 | -0.54556 |
| H | 3.474525 | -3.01995 | -2.47085 | H | 2.059509 | -3.60022 | -1.15906 |
| H | 3.755675 | -3.26853 | -0.73889 | H | 3.392238 | -3.22575 | -2.28669 |
| H | 4.442299 | 0.706099 | 3.235429 | H | 4.442539 | 0.858687 | 3.183912 |
| H | 5.068957 | -0.9161  | 3.574385 | H | 5.038115 | -0.74981 | 3.631595 |
| H | 5.648359 | -0.00269 | 2.166433 | H | 5.649927 | 0.064334 | 2.177204 |
| H | -2.49494 | 1.572163 | 1.806454 | H | -2.52079 | 1.64114  | 1.740206 |
| H | 1.104766 | 1.655417 | 1.456464 | H | 0.095144 | 2.100418 | 0.339466 |
| H | -0.3088  | -1.53172 | 2.400881 | H | -0.28074 | -1.34942 | 2.487386 |
| H | 0.97448  | -0.39923 | 2.856429 | H | 0.981915 | -0.15115 | 2.855237 |
| H | -0.71802 | 0.030165 | 3.142565 | H | -0.71823 | 0.250068 | 3.125454 |
| H | -5.9973  | 0.765091 | 1.104567 | H | -6.0155  | 0.778292 | 1.059888 |
| H | -4.13991 | 2.699557 | 2.558312 | H | -4.17982 | 2.779361 | 2.450515 |
| H | -5.84506 | 2.376387 | 2.851812 | H | -5.88199 | 2.449084 | 2.752551 |
| H | -4.6426  | 1.12371  | 3.196255 | H | -4.66743 | 1.220783 | 3.139607 |
| H | 4.155497 | 4.865529 | -2.00686 | H | 3.832153 | 4.671836 | -2.65339 |
| H | 3.86806  | 3.469966 | -3.04802 | H | 2.783965 | 3.418396 | -3.31176 |
| H | 5.139717 | 3.402569 | -1.82049 | H | 4.511115 | 3.093979 | -3.08332 |
| H | 1.356445 | 3.499928 | -2.2729  | H | 1.245743 | 3.644113 | -1.23702 |
| H | 0.979115 | 3.406111 | -0.54849 | H | 1.938263 | 3.536543 | 0.395274 |
| H | 1.699121 | 4.884805 | -1.22655 | H | 2.293835 | 4.935099 | -0.63691 |
| H | -6.2445  | 3.159421 | 0.461624 | H | -6.28977 | 3.144551 | 0.334355 |
| H | -4.52379 | 3.232068 | 0.040402 | H | -4.5691  | 3.225819 | -0.08268 |
| H | -5.62072 | 2.220464 | -0.90578 | H | -5.6489  | 2.168368 | -0.99858 |
| H | -3.7963  | -3.05043 | -1.66402 | H | -3.78524 | -3.09627 | -1.5874  |
| H | -2.14208 | -2.68971 | -2.22515 | H | -2.12381 | -2.75484 | -2.13985 |
| H | -3.56975 | -1.86163 | -2.90971 | H | -3.54253 | -1.94947 | -2.86871 |
| H | -6.26232 | -0.08546 | -0.56379 | H | -6.27117 | -0.13424 | -0.57454 |

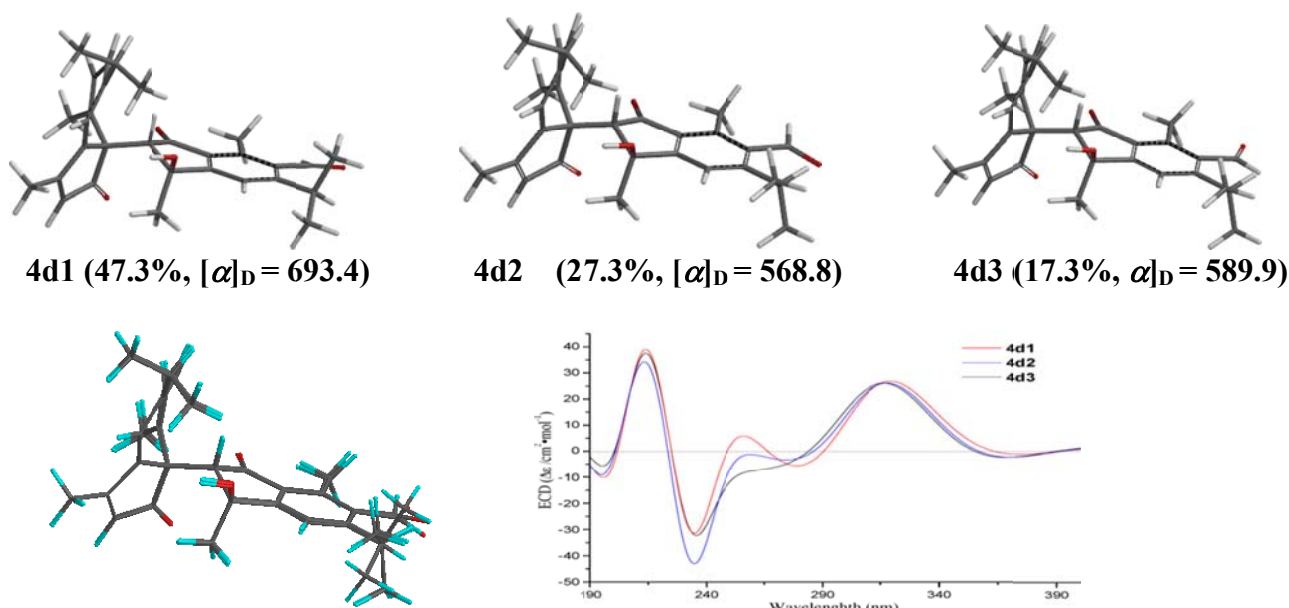

**Figure S9.** Structural candidates of compound **4** with  $10S,1'S,2'S$  absolute configuration, and the optical rotation and overlaid ECD calculated on Gaussian program.

**Table S16.** Important thermodynamic parameters (a.u.) of the optimized **4d** with  $10S,1'S,2'S$  absolute configuration at B3LYP/6-31G(d,p) level in the gas phase

| conformations | E+ZPE        | G            |
|---------------|--------------|--------------|
| <b>4d1</b>    | -1464.011774 | -1464.074928 |
| <b>4d2</b>    | -1464.011620 | -1464.074410 |
| <b>4d3</b>    | -1464.009848 | -1464.073978 |

**Table S17.** Optimized Z-Matrixes of compound **4** with  $10R,1'S,2'S$  absolute configuration in the Gas Phase (Å) at B3LYP/6-31g(d,p) level.

| 4d1 |          |          | 4d2      |   |          | 4d3      |          |   |          |          |          |
|-----|----------|----------|----------|---|----------|----------|----------|---|----------|----------|----------|
| C   | -3.11885 | 1.479636 | -1.27184 | C | -3.24657 | 1.367007 | -1.24569 | C | -3.22512 | 1.26863  | -1.33372 |
| C   | -2.898   | 0.553086 | -2.2622  | C | -3.03853 | 0.412803 | -2.21246 | C | -2.98041 | 0.275655 | -2.25158 |
| C   | -2.93268 | -0.88187 | -2.1638  | C | -3.01366 | -1.01777 | -2.06177 | C | -2.93102 | -1.14571 | -2.03517 |
| C   | -2.6655  | -1.68012 | -1.09466 | C | -2.66575 | -1.76551 | -0.97925 | C | -2.59016 | -1.83648 | -0.91325 |
| C   | -2.03141 | -1.08961 | 0.175614 | C | -1.99186 | -1.10549 | 0.235544 | C | -1.95474 | -1.10812 | 0.283387 |
| C   | -3.06523 | -0.08927 | 0.683405 | C | -3.03681 | -0.12495 | 0.758493 | C | -3.02966 | -0.12665 | 0.740181 |
| C   | -3.42968 | 1.077584 | 0.076141 | C | -3.47463 | 1.00476  | 0.129726 | C | -3.47557 | 0.96463  | 0.051878 |
| C   | -1.99593 | -2.12934 | 1.336396 | C | -1.86096 | -2.09925 | 1.429314 | C | -1.82983 | -2.04439 | 1.523642 |
| C   | -3.06487 | -1.77836 | 2.278007 | C | -2.89732 | -1.75391 | 2.408625 | C | -2.89279 | -1.67564 | 2.465579 |
| C   | -3.64727 | -0.60211 | 1.92707  | C | -3.53986 | -0.61321 | 2.046014 | C | -3.54966 | -0.56589 | 2.038559 |
| C   | -3.23934 | 2.957347 | -1.64014 | C | -3.44485 | 2.824107 | -1.66005 | C | -3.43853 | 2.702118 | -1.81748 |
| C   | -2.96277 | -3.15107 | -1.1374  | C | -2.91172 | -3.24617 | -0.95292 | C | -2.80597 | -3.31935 | -0.82473 |
| C   | -4.7459  | 0.091645 | 2.673029 | C | -4.62839 | 0.066272 | 2.819261 | C | -4.66804 | 0.124945 | 2.757466 |
| O   | -1.19586 | -3.04356 | 1.443395 | O | -1.02179 | -2.97834 | 1.529267 | O | -0.97741 | -2.90194 | 1.680609 |
| C   | 0.403023 | -1.51772 | -0.69132 | C | 0.41301  | -1.48385 | -0.72838 | C | 0.476333 | -1.47387 | -0.62274 |
| C   | -0.62336 | -0.50784 | -0.13505 | C | -0.6234  | -0.48738 | -0.16704 | C | -0.59235 | -0.47852 | -0.12049 |
| C   | 0.167788 | 0.33907  | 0.918311 | C | 0.181061 | 0.433091 | 0.811544 | C | 0.174352 | 0.49675  | 0.832918 |
| C   | 1.603211 | 0.141337 | 0.459269 | C | 1.60342  | 0.257697 | 0.305368 | C | 1.606206 | 0.33972  | 0.348962 |
| C   | 1.752184 | -0.97257 | -0.37    | C | 1.755409 | -0.88496 | -0.48347 | C | 1.801776 | -0.82788 | -0.39097 |
| C   | 2.690889 | 0.919561 | 0.82267  | C | 2.679676 | 1.082317 | 0.592545 | C | 2.652636 | 1.210211 | 0.612439 |
| C   | 3.974487 | 0.589902 | 0.372745 | C | 3.959673 | 0.756791 | 0.129962 | C | 3.940154 | 0.90588  | 0.163201 |
| C   | 4.135417 | -0.57129 | -0.44755 | C | 4.126906 | -0.43794 | -0.63919 | C | 4.158664 | -0.31544 | -0.55028 |
| C   | 3.021377 | -1.369   | -0.82441 | C | 3.018415 | -1.26406 | -0.96904 | C | 3.080699 | -1.19585 | -0.85129 |
| O   | -0.13087 | 1.734676 | 0.821718 | O | -0.16796 | 1.812206 | 0.6603   | O | -0.20675 | 1.861096 | 0.629656 |
| C   | 0.049195 | -0.10659 | 2.38671  | C | 0.135547 | 0.055833 | 2.303163 | C | 0.120643 | 0.17148  | 2.33665  |
| C   | 5.145711 | 1.489098 | 0.761882 | C | 5.124334 | 1.679673 | 0.481766 | C | 5.077834 | 1.879751 | 0.493924 |

|   |          |          |          |   |          |          |          |   |          |          |          |
|---|----------|----------|----------|---|----------|----------|----------|---|----------|----------|----------|
| O | 0.135281 | -2.50557 | -1.35163 | O | 0.150857 | -2.50301 | -1.34173 | O | 0.244073 | -2.52709 | -1.18626 |
| C | 4.977039 | 2.170986 | 2.130168 | C | 4.729094 | 3.163775 | 0.570665 | C | 5.80664  | 1.442897 | 1.782847 |
| C | -2.36647 | 3.856363 | -0.74673 | C | -2.5615  | 3.789699 | -0.85012 | C | -2.59164 | 3.71812  | -1.03048 |
| C | -4.70564 | 3.433602 | -1.64065 | C | -4.92693 | 3.243812 | -1.59502 | C | -4.92854 | 3.097825 | -1.80603 |
| C | 5.392992 | 2.540492 | -0.34132 | C | 5.794095 | 1.214929 | 1.792548 | C | 4.627257 | 3.34661  | 0.608285 |
| H | -0.7559  | 0.197438 | -0.96492 | H | -0.82115 | 0.174813 | -1.01901 | H | -0.7888  | 0.143599 | -1.00245 |
| C | 3.153481 | -2.59423 | -1.70813 | C | 3.155081 | -2.52646 | -1.79847 | C | 3.262404 | -2.47403 | -1.63008 |
| C | 5.468363 | -1.01735 | -0.92613 | C | 5.453448 | -0.86095 | -1.15434 | C | 5.539676 | -0.66152 | -0.9722  |
| O | 6.498837 | -0.36249 | -0.94287 | O | 6.544425 | -0.44494 | -0.79668 | O | 5.878475 | -1.6559  | -1.59302 |
| H | -2.82232 | 0.943236 | -3.2768  | H | -3.02783 | 0.767517 | -3.24278 | H | -2.95438 | 0.583341 | -3.29663 |
| H | -3.2286  | -1.39051 | -3.08035 | H | -3.33469 | -1.57065 | -2.94362 | H | -3.22227 | -1.74451 | -2.89713 |
| H | -4.08441 | 1.743997 | 0.63641  | H | -4.12657 | 1.666928 | 0.698181 | H | -4.15198 | 1.63852  | 0.57627  |
| H | -3.30783 | -2.38629 | 3.141493 | H | -3.07584 | -2.33855 | 3.303338 | H | -3.07885 | -2.22286 | 3.382185 |
| H | -2.86791 | 3.054124 | -2.66805 | H | -3.13374 | 2.895347 | -2.70982 | H | -3.10325 | 2.732634 | -2.86177 |
| H | -3.68399 | -3.42193 | -0.35368 | H | -3.37888 | -3.58356 | -1.88117 | H | -3.48651 | -3.56064 | 0.003769 |
| H | -2.05502 | -3.7318  | -0.95374 | H | -1.9755  | -3.78844 | -0.79641 | H | -1.86184 | -3.83305 | -0.62548 |
| H | -3.39092 | -3.43739 | -2.10094 | H | -3.58119 | -3.51064 | -0.12248 | H | -3.24685 | -3.70806 | -1.74568 |
| H | -4.4388  | 1.098166 | 2.980724 | H | -4.34705 | 1.09434  | 3.076071 | H | -4.41688 | 1.171681 | 2.965641 |
| H | -5.03015 | -0.46512 | 3.568348 | H | -5.54795 | 0.12658  | 2.226678 | H | -4.89188 | -0.366   | 3.70683  |
| H | -5.63292 | 0.209135 | 2.040728 | H | -4.8483  | -0.4671  | 3.746394 | H | -5.57795 | 0.131633 | 2.147123 |
| H | 2.534021 | 1.788695 | 1.449608 | H | 2.516687 | 1.983756 | 1.170557 | H | 2.453698 | 2.127385 | 1.152537 |
| H | -1.05449 | 1.847058 | 1.0872   | H | -1.08886 | 1.905609 | 0.94245  | H | -1.13868 | 1.93606  | 0.879491 |
| H | 0.313802 | -1.15805 | 2.515553 | H | -0.87224 | 0.176674 | 2.709827 | H | 0.459004 | -0.84559 | 2.544736 |
| H | -0.9681  | 0.039127 | 2.760721 | H | 0.451398 | -0.97573 | 2.471769 | H | -0.89427 | 0.282119 | 2.72828  |
| H | 0.723852 | 0.50327  | 2.993146 | H | 0.805335 | 0.722496 | 2.85253  | H | 0.767663 | 0.87351  | 2.869201 |
| H | 6.041117 | 0.867169 | 0.807713 | H | 5.874699 | 1.582484 | -0.30422 | H | 5.802044 | 1.855402 | -0.32556 |
| H | 4.728296 | 1.451226 | 2.916687 | H | 4.190221 | 3.496351 | -0.32219 | H | 6.2102   | 0.429395 | 1.701024 |
| H | 4.203706 | 2.946478 | 2.121954 | H | 5.633818 | 3.772948 | 0.664303 | H | 5.118559 | 1.457692 | 2.63486  |
| H | 5.916039 | 2.660219 | 2.407764 | H | 4.105225 | 3.383552 | 1.443533 | H | 6.635921 | 2.12297  | 2.004396 |
| H | -1.3276  | 3.515699 | -0.73157 | H | -1.5103  | 3.490109 | -0.88052 | H | -1.53499 | 3.436628 | -1.0225  |
| H | -2.73335 | 3.864318 | 0.287113 | H | -2.87204 | 3.824787 | 0.201515 | H | -2.92819 | 3.792668 | 0.011004 |
| H | -2.38731 | 4.891352 | -1.10403 | H | -2.64287 | 4.808314 | -1.24396 | H | -2.68112 | 4.717057 | -1.47034 |
| H | -5.14891 | 3.382488 | -0.63948 | H | -5.55173 | 2.587258 | -2.20805 | H | -5.33793 | 3.103047 | -0.78927 |
| H | -5.31971 | 2.823808 | -2.31024 | H | -5.31165 | 3.211289 | -0.56927 | H | -5.52705 | 2.404342 | -2.40444 |
| H | -4.77017 | 4.475742 | -1.97157 | H | -5.05145 | 4.270206 | -1.95658 | H | -5.06153 | 4.105159 | -2.21517 |
| H | 4.517138 | 3.186602 | -0.46837 | H | 6.643198 | 1.864041 | 2.031806 | H | 4.019078 | 3.527163 | 1.500204 |
| H | 5.617268 | 2.059453 | -1.29525 | H | 6.167425 | 0.193345 | 1.69891  | H | 4.050421 | 3.662558 | -0.26591 |
| H | 6.24623  | 3.172638 | -0.07318 | H | 5.087877 | 1.257369 | 2.62958  | H | 5.50794  | 3.992024 | 0.684909 |
| H | 3.676174 | -2.36792 | -2.6423  | H | 3.861587 | -3.22877 | -1.34519 | H | 3.96094  | -3.14078 | -1.11647 |
| H | 2.167233 | -2.98742 | -1.94692 | H | 3.517154 | -2.30768 | -2.80924 | H | 3.71923  | -2.27681 | -2.60346 |
| H | 3.715867 | -3.38847 | -1.20391 | H | 2.189216 | -3.02001 | -1.8852  | H | 2.3065   | -2.97584 | -1.76069 |
| H | 5.494876 | -2.05926 | -1.29531 | H | 5.413095 | -1.63662 | -1.94092 | H | 6.319432 | 0.06296  | -0.67415 |

**Table S18.** Calculated OR for the structural candidates of **4** at RB3LYP-SCRF(PCM, methanol)/6-311+G(2d,p) level

| conformations | OR     | configuration                         | OR <sub>b</sub> |
|---------------|--------|---------------------------------------|-----------------|
| <b>4a1</b>    | 276.4  | 10 <i>S</i> ,1' <i>R</i> ,2' <i>R</i> | <b>276.4</b>    |
| <b>4b1</b>    | -278.5 | 10 <i>R</i> ,1' <i>S</i> ,2' <i>S</i> | <b>-402.2</b>   |
| <b>4b2</b>    | -513.1 |                                       |                 |
| <b>4b3</b>    | -513.5 |                                       |                 |
| <b>4b4</b>    | -513.3 |                                       |                 |
| <b>4b5</b>    | -457.7 |                                       |                 |
| <b>4c1</b>    | -746.2 | 10 <i>R</i> ,1' <i>R</i> ,2' <i>R</i> | <b>-675.7</b>   |
| <b>4c2</b>    | -698.0 |                                       |                 |
| <b>4c3</b>    | -627.6 |                                       |                 |
| <b>4c4</b>    | -731.7 |                                       |                 |
| <b>4d1</b>    | 693.4  | 10 <i>S</i> ,1' <i>S</i> ,2' <i>S</i> | <b>584.6</b>    |
| <b>4d2</b>    | 568.8  |                                       |                 |
| <b>4d3</b>    | 568.9  |                                       |                 |

OR<sub>b</sub>: The combined OR values after Boltzmann weighting according to their population contribution.

ZHY11-2-3

20120608-ZHY11-2-3 139 (2.638) Sm (Mn, 2x3.00); Sm (Mn, 2x3.00)

TOF MS ES+  
956

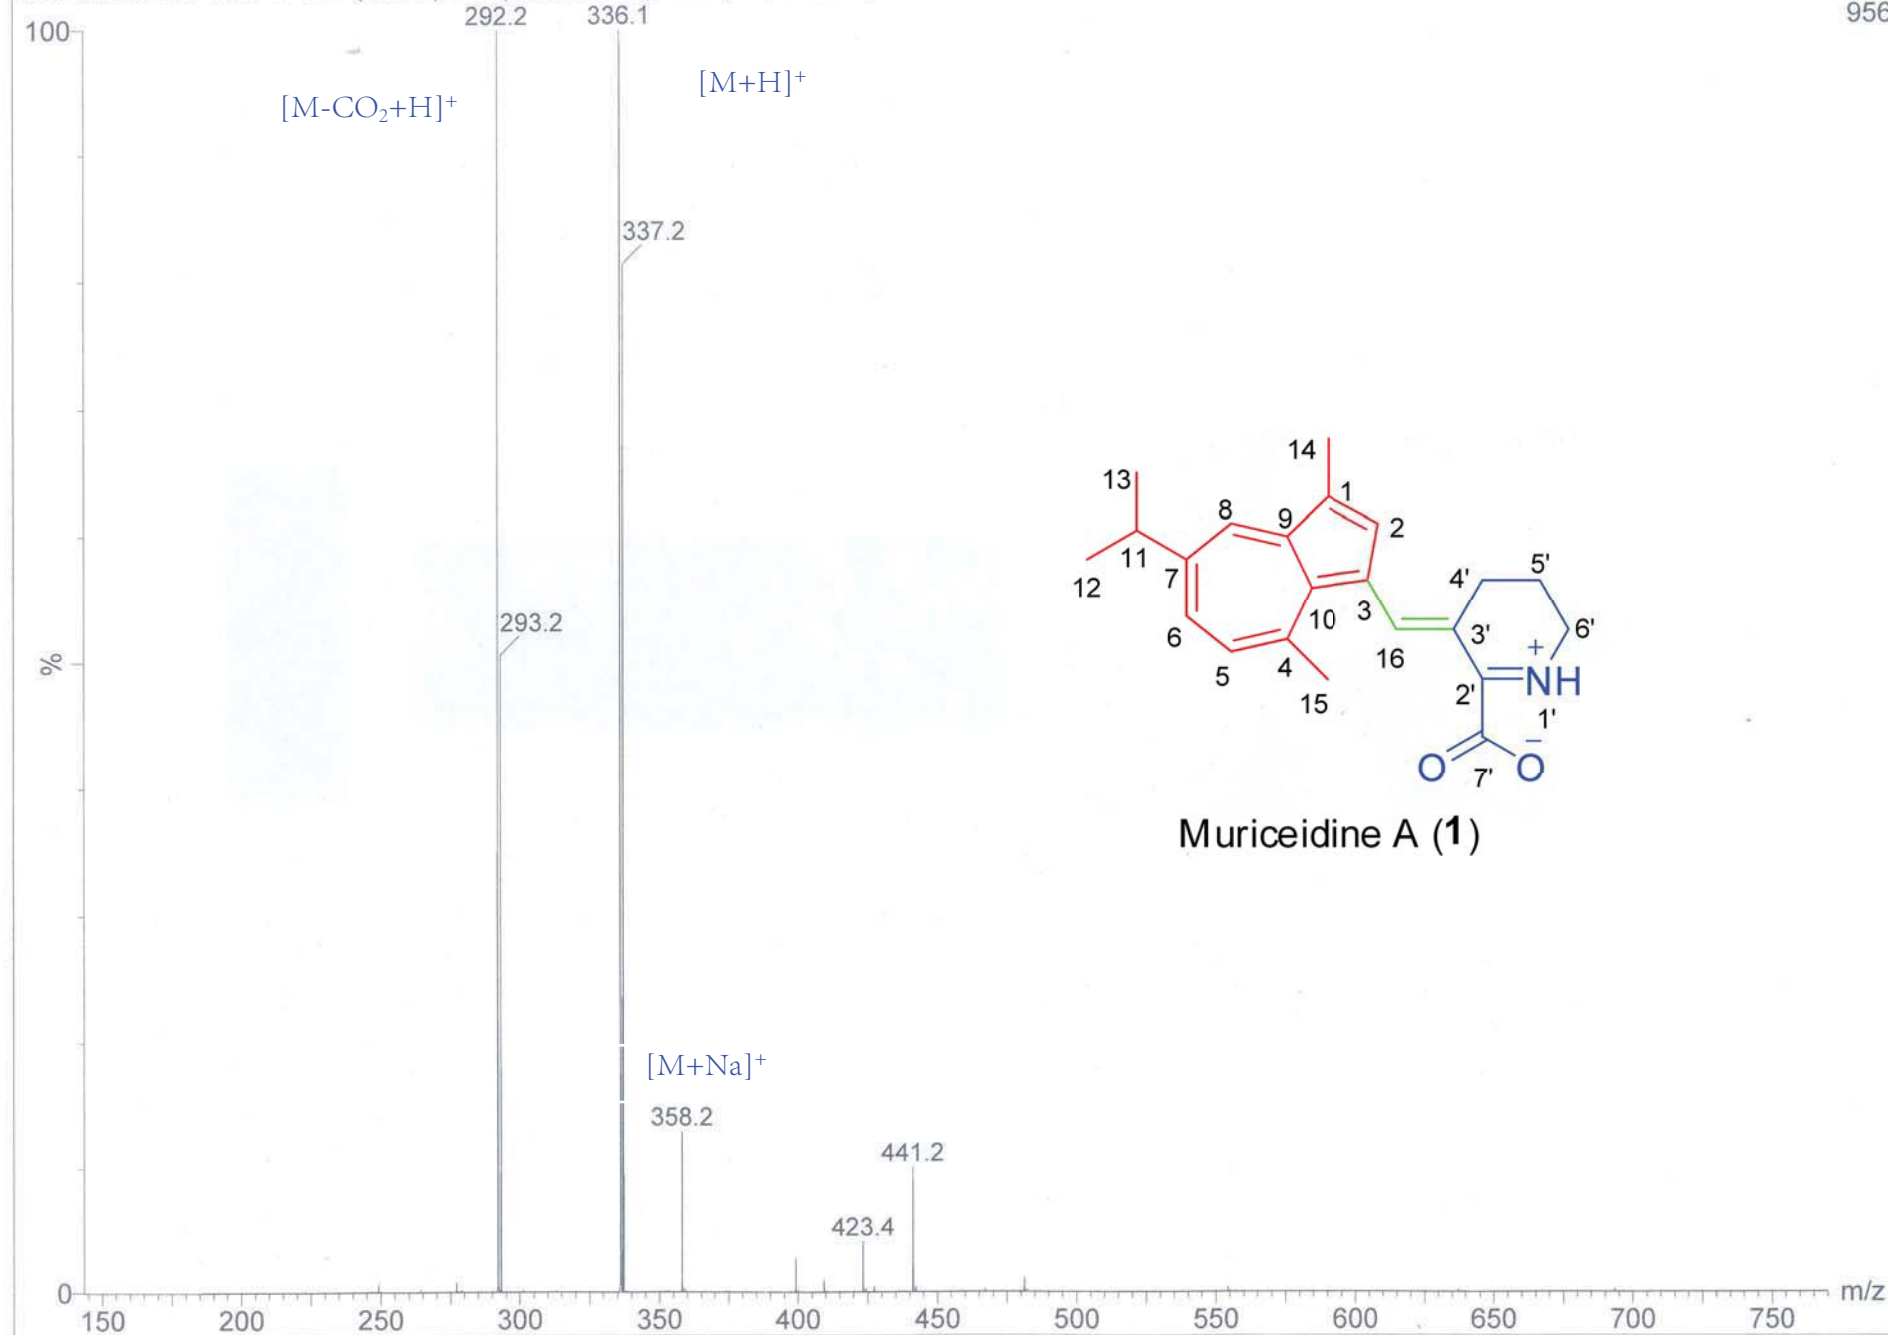

SS1 The positive ESIMS spectrum of muriceidine A (1)

20120706-ZHY-11-2-3\_120706105310 #18 RT: 0.18 AV: 1 NL: 1.09E7  
T: FTMS + c ESI Full ms [60.00-1500.00]

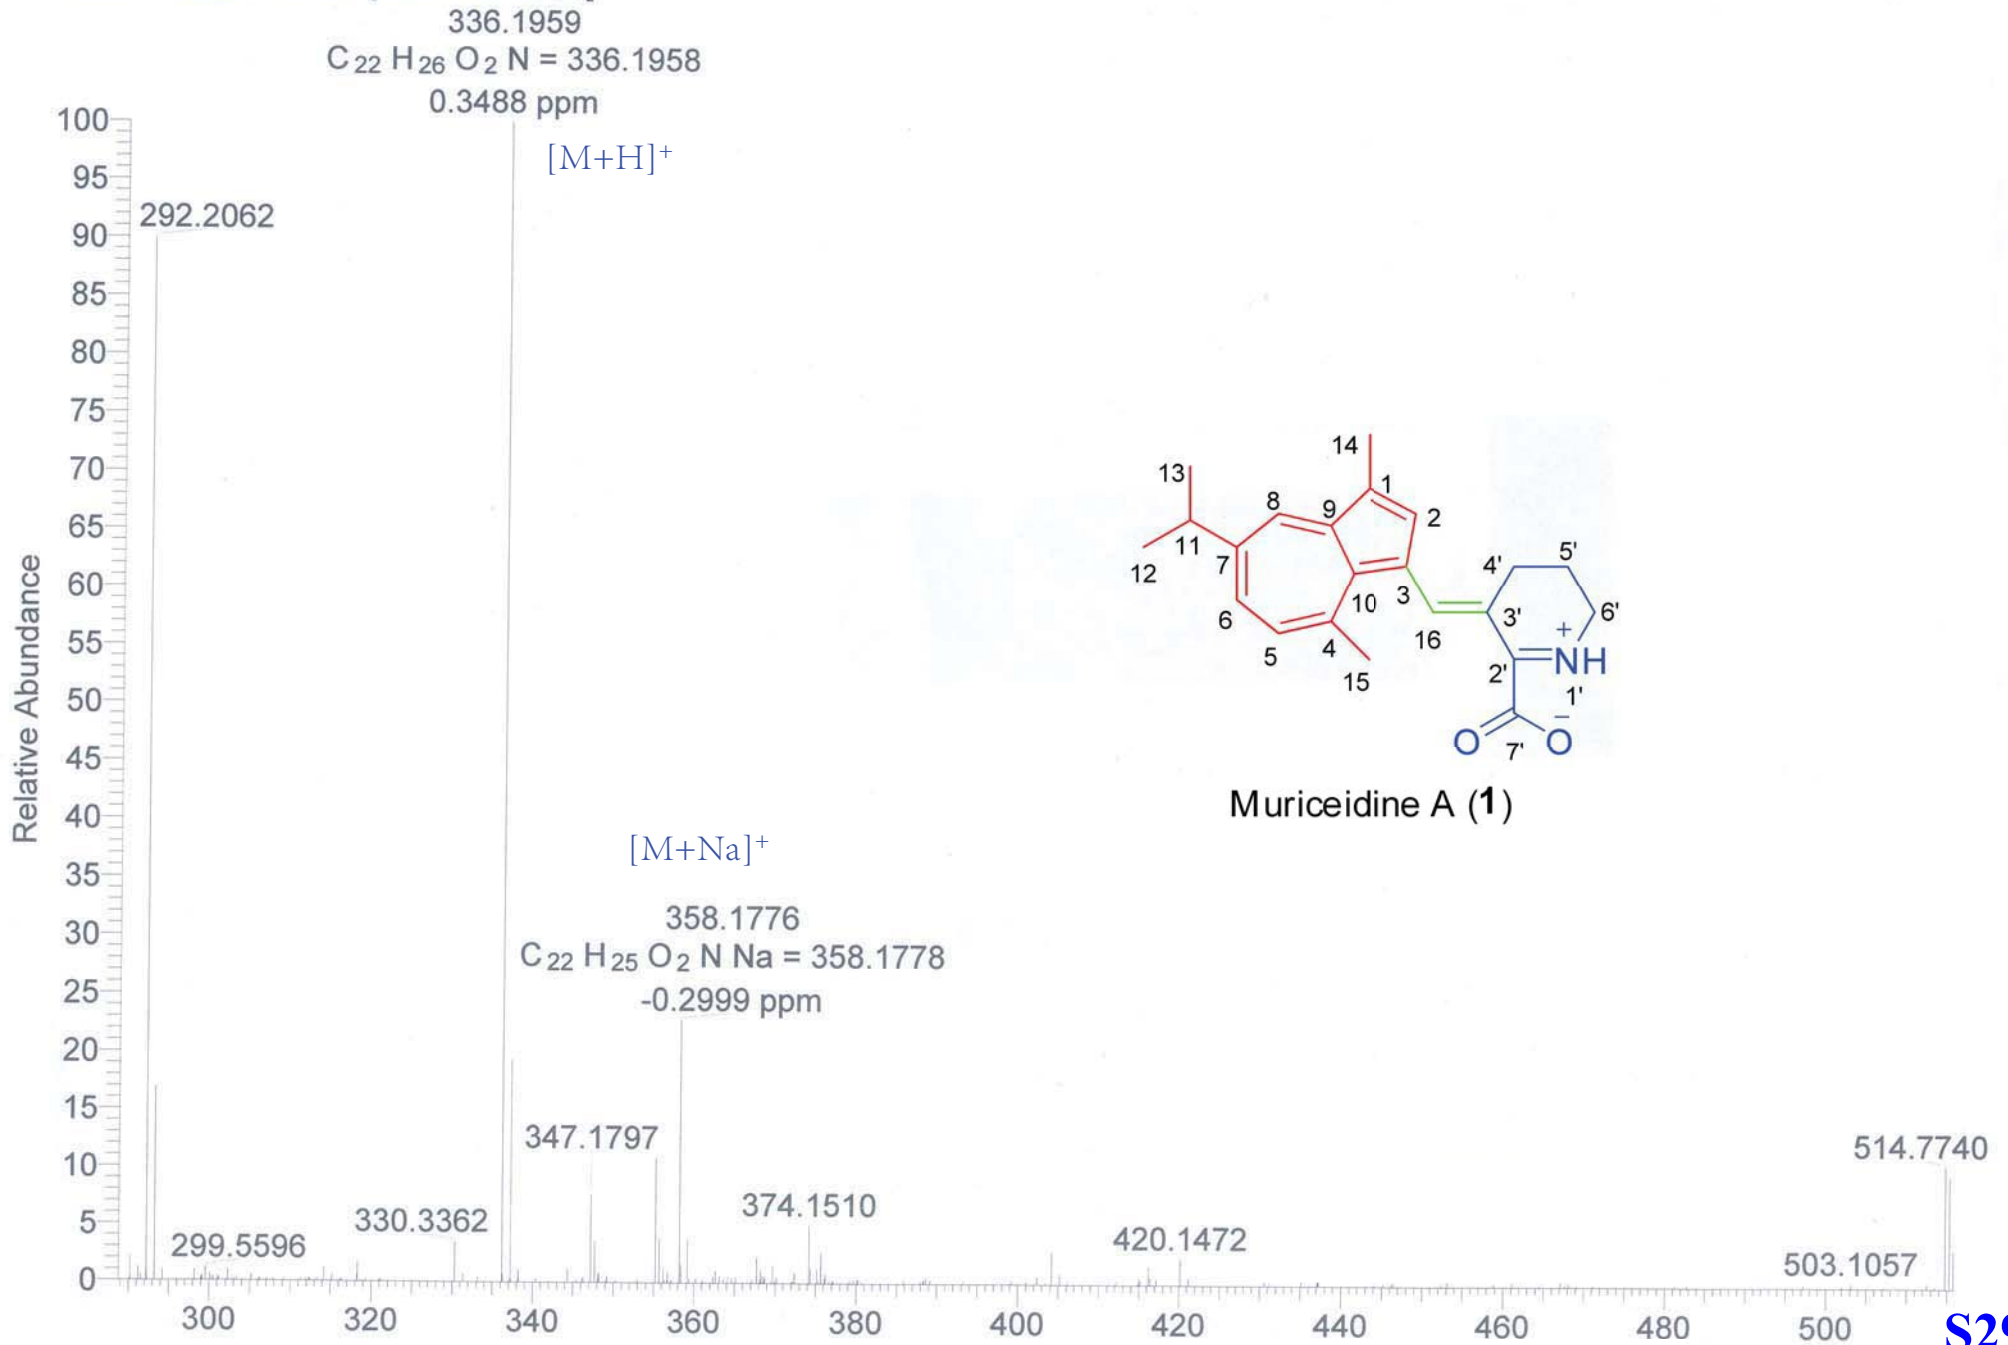

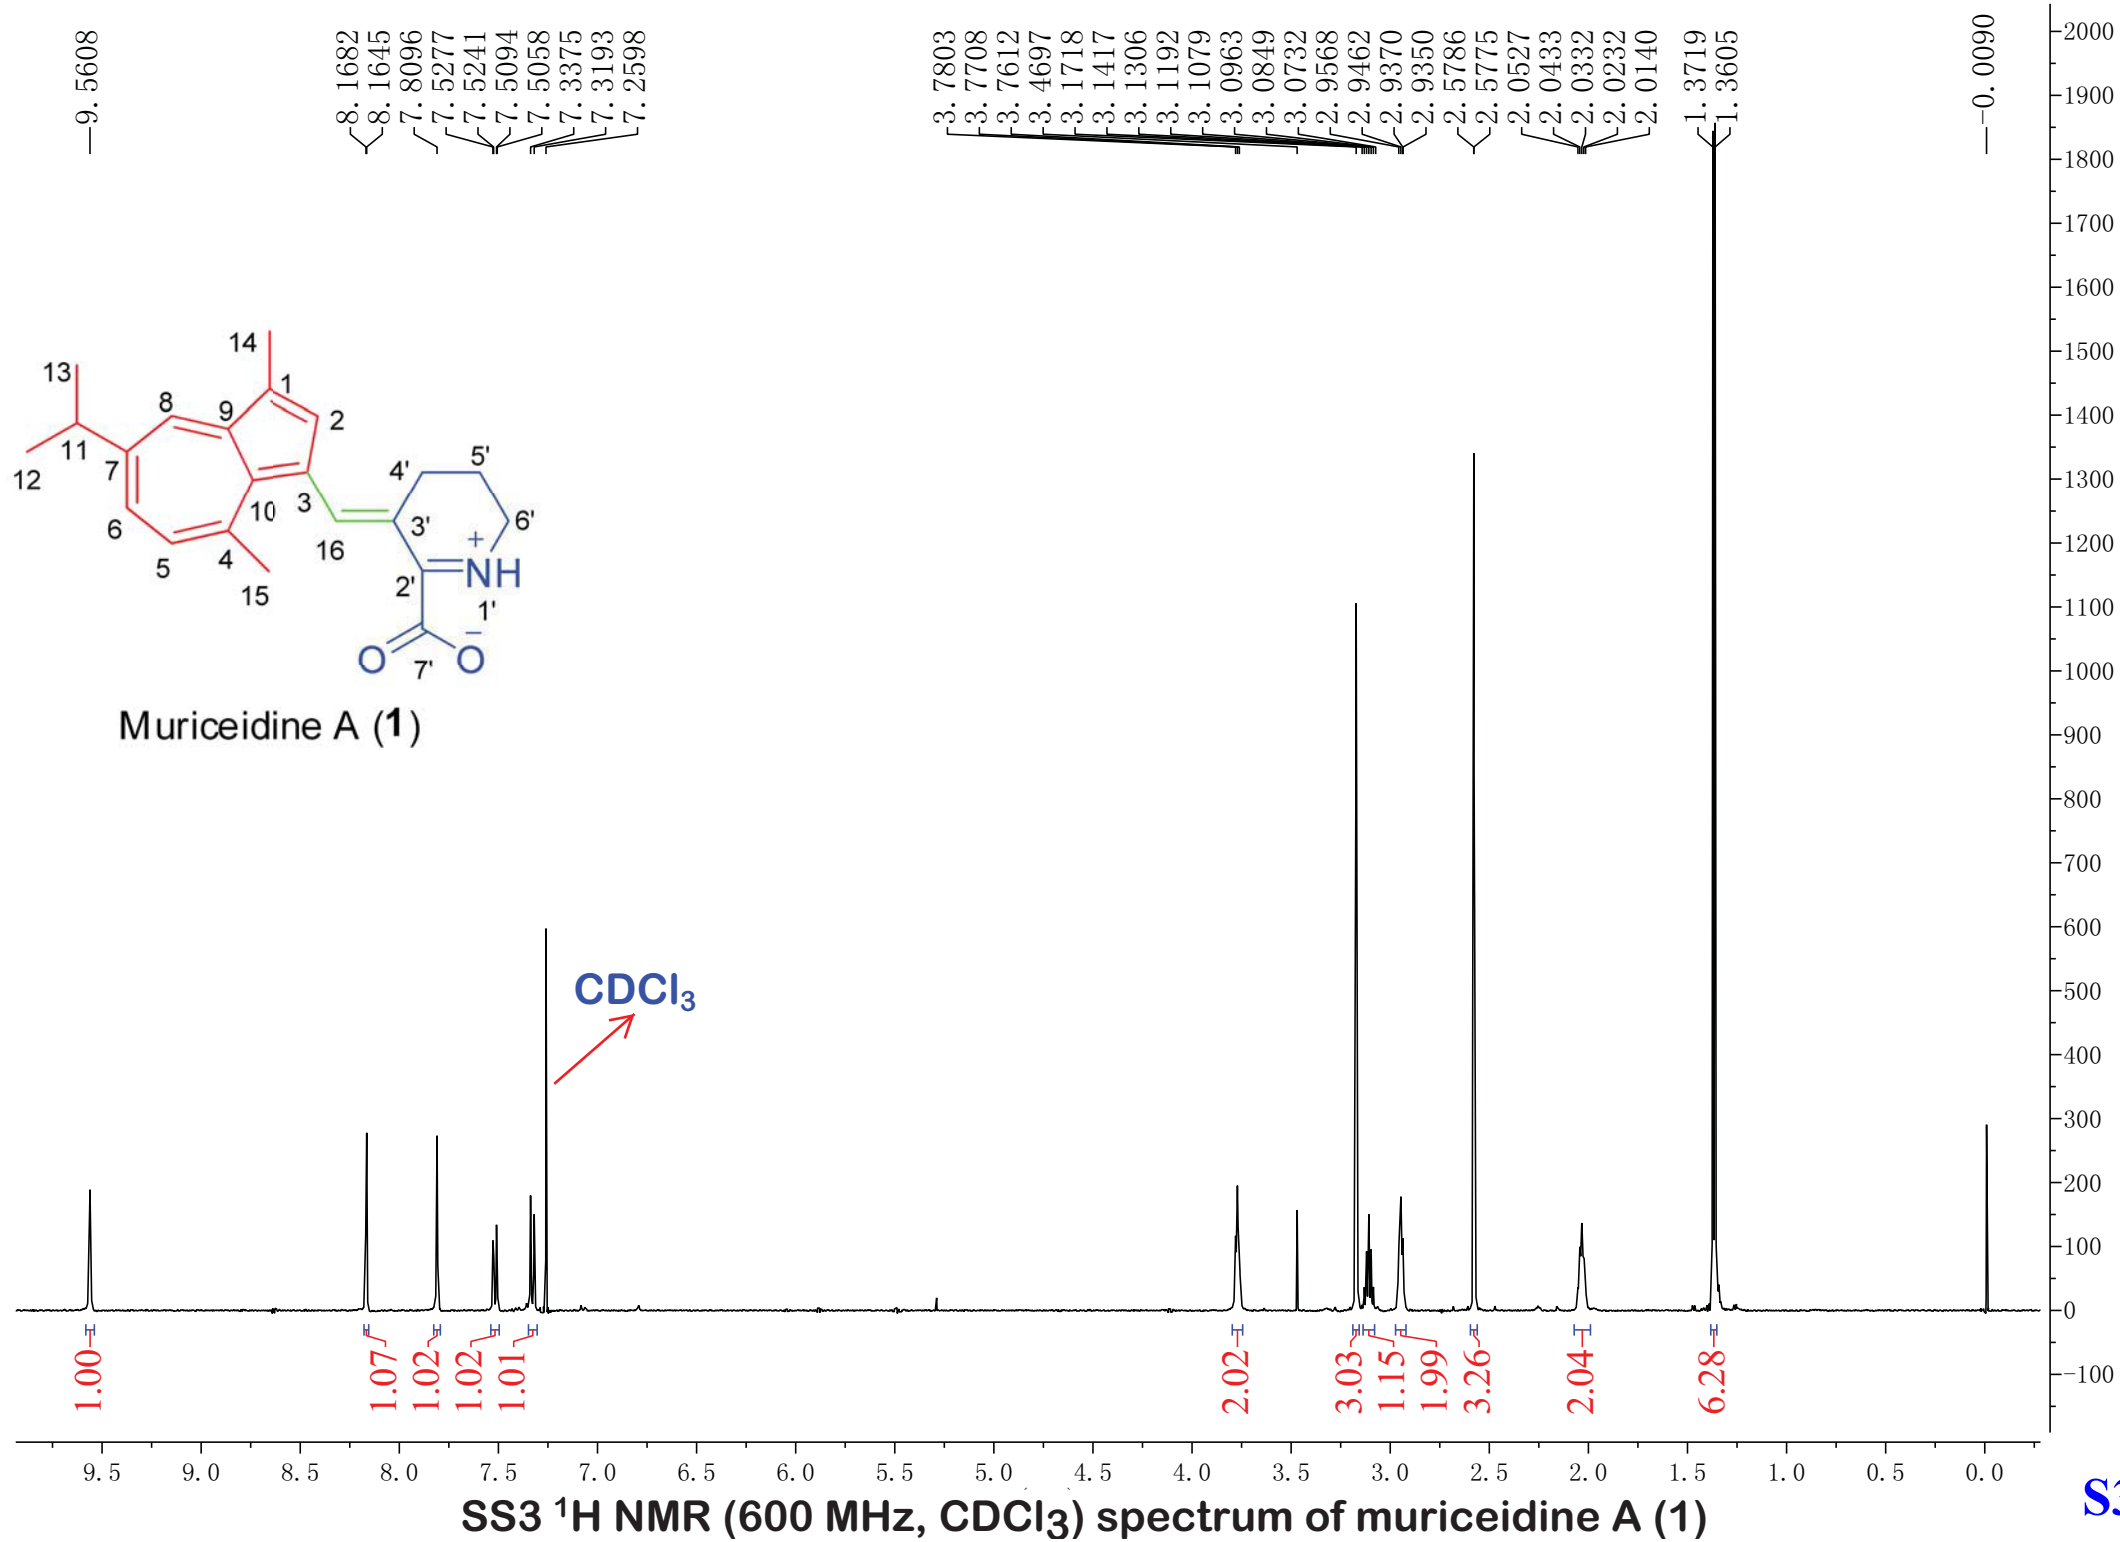

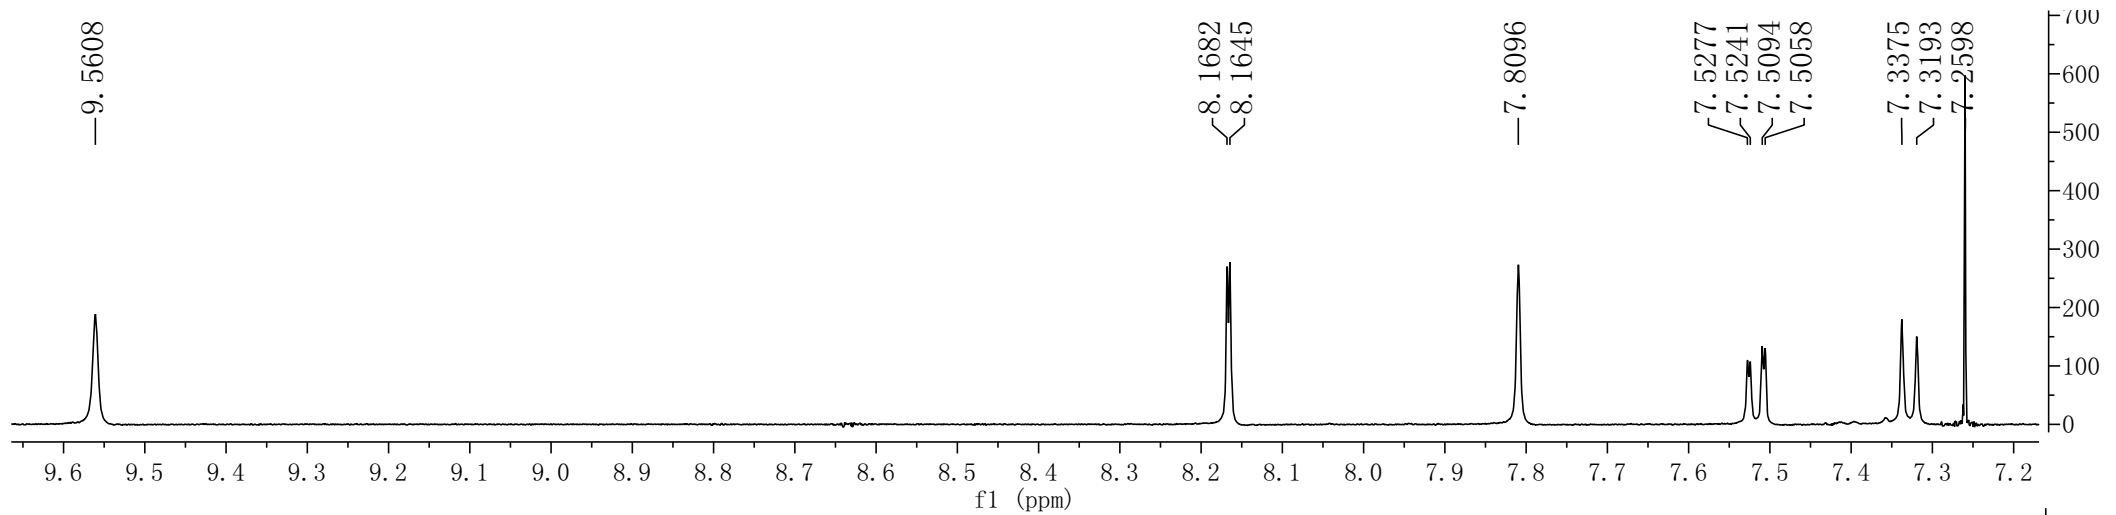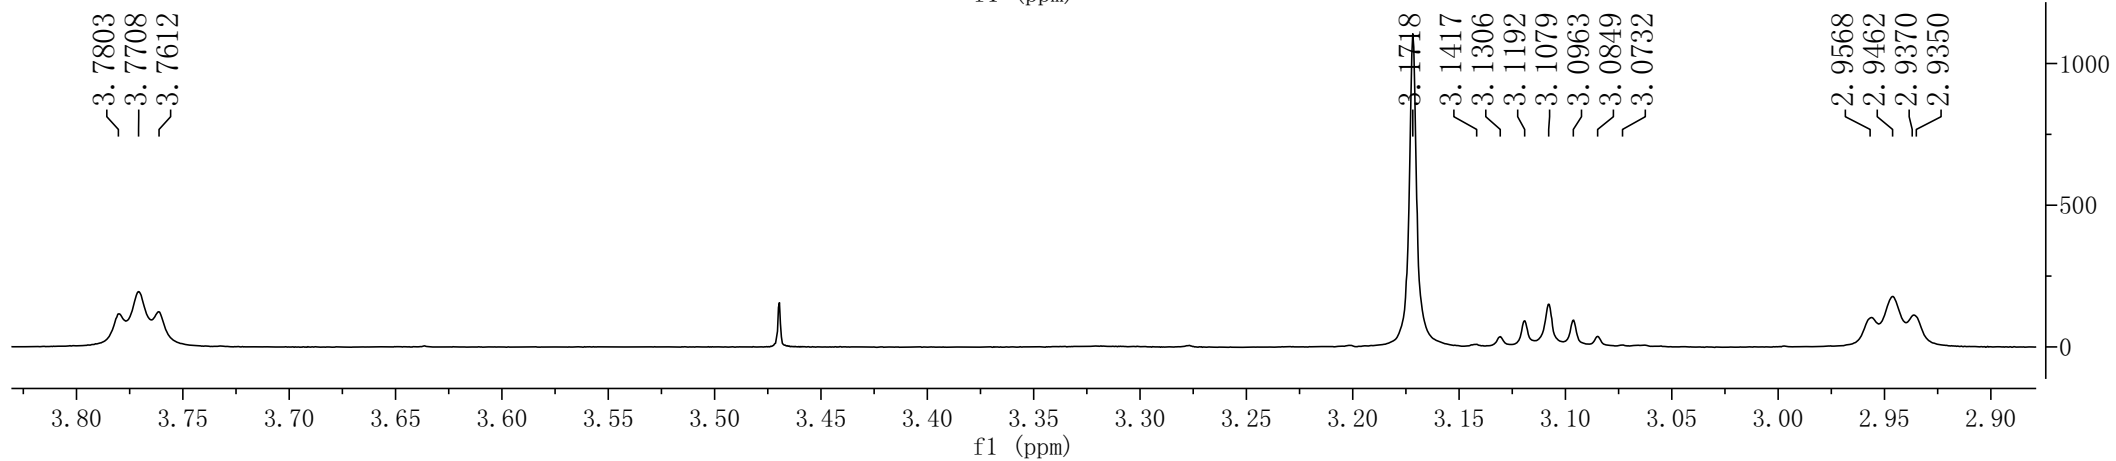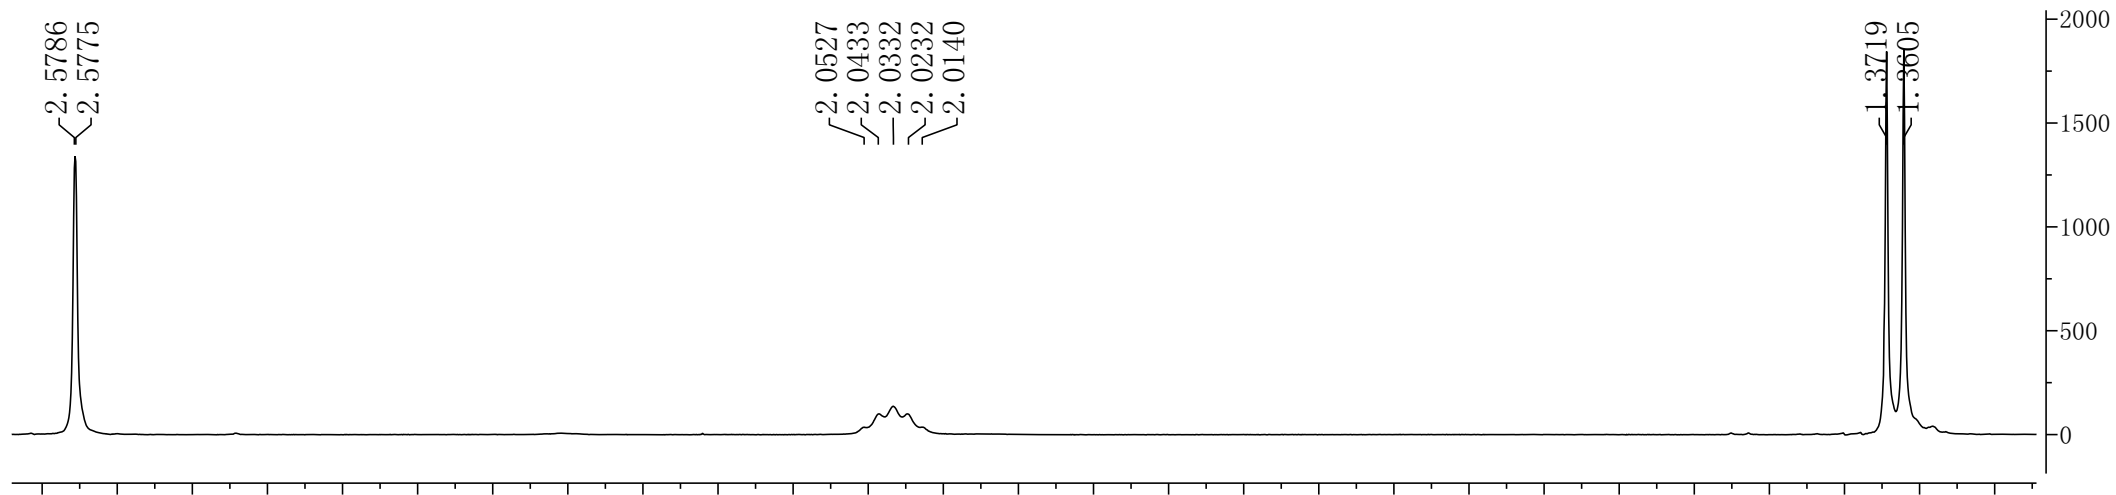

SS4 The amplificatory  $^1\text{H}$  NMR spectrum of muriceidine A (1)

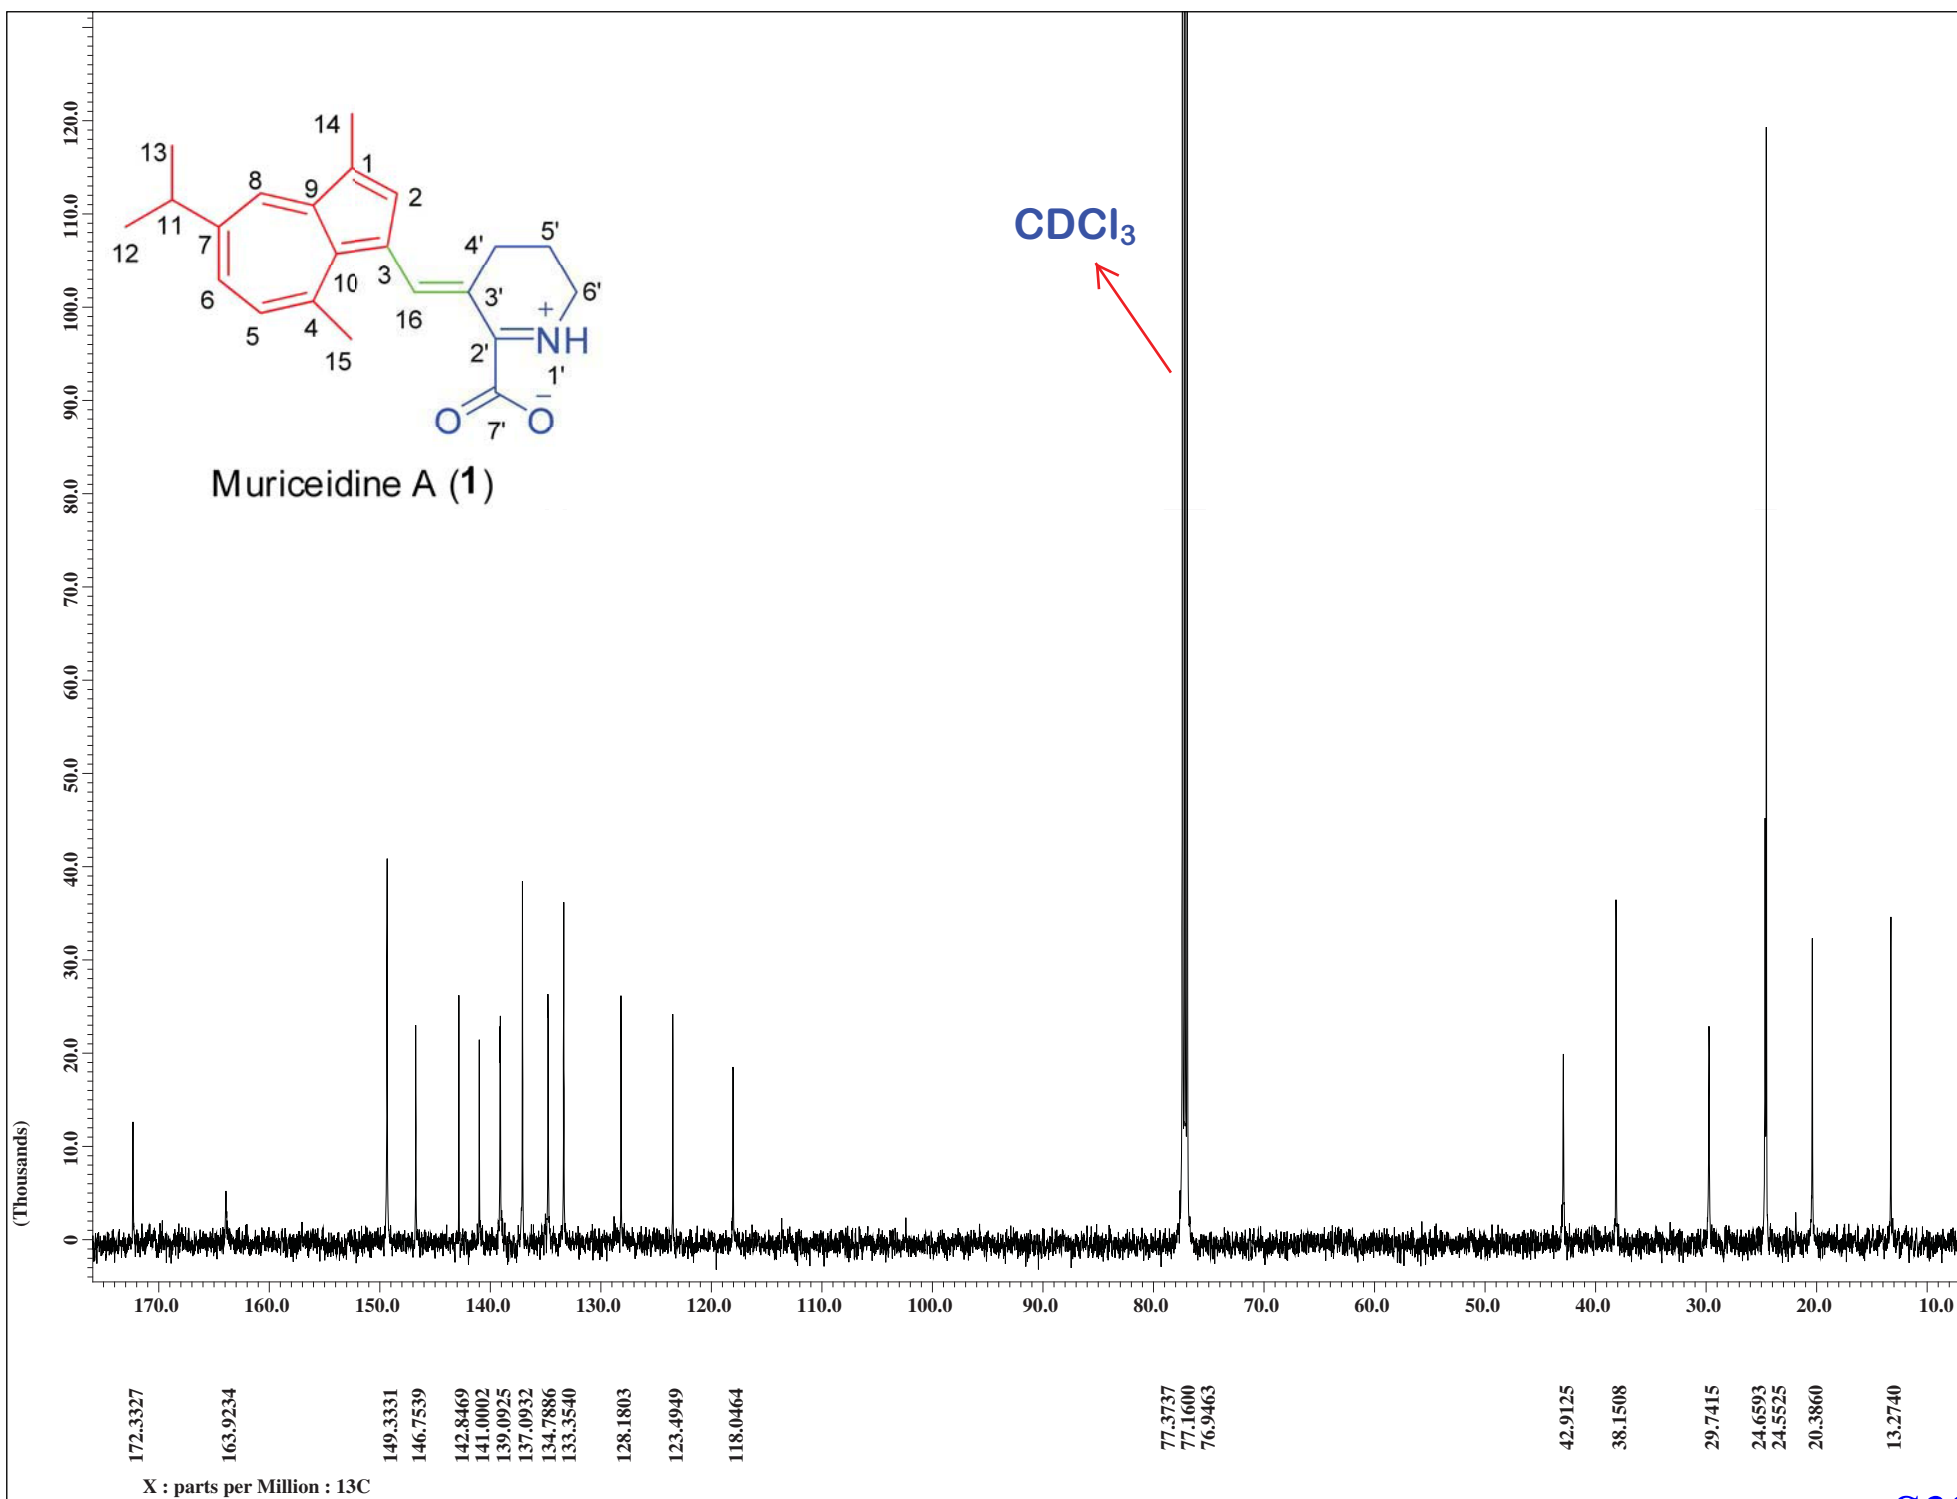

SS5 <sup>13</sup>C NMR (150 MHz, CDCl<sub>2</sub>) spectrum of muriceidine A (1)



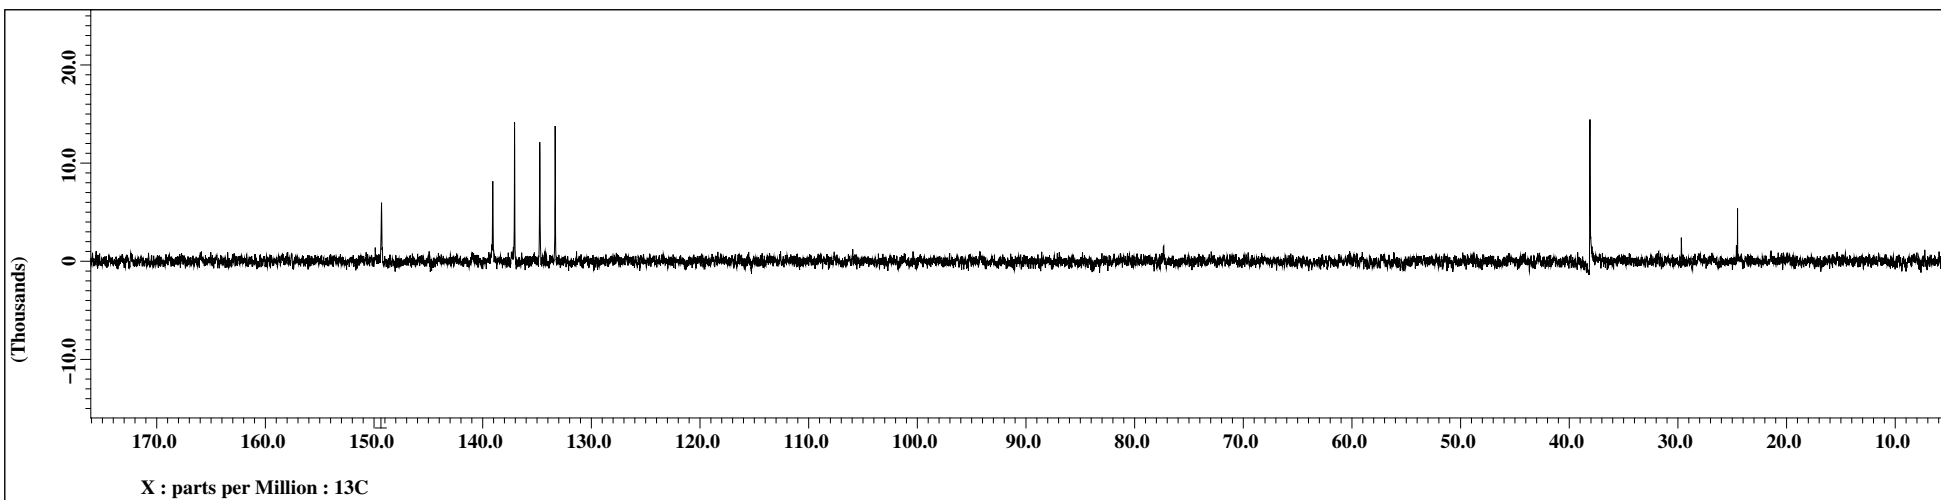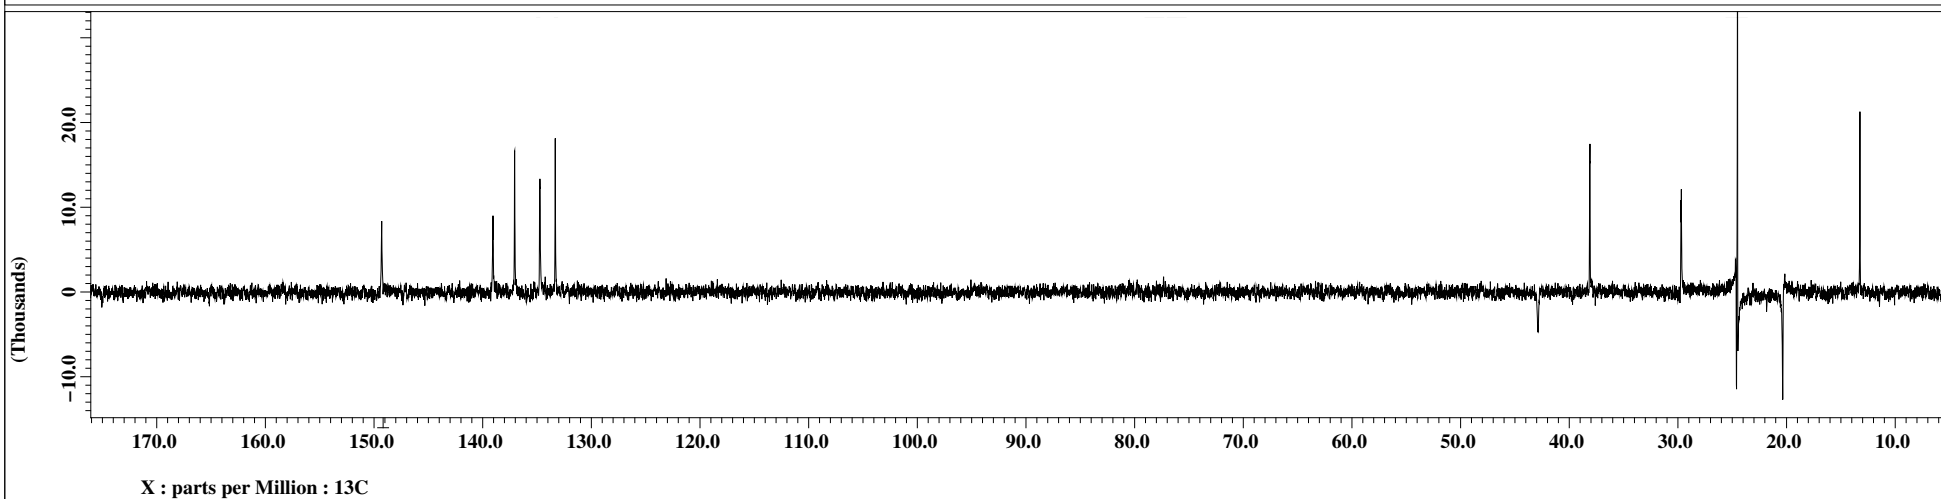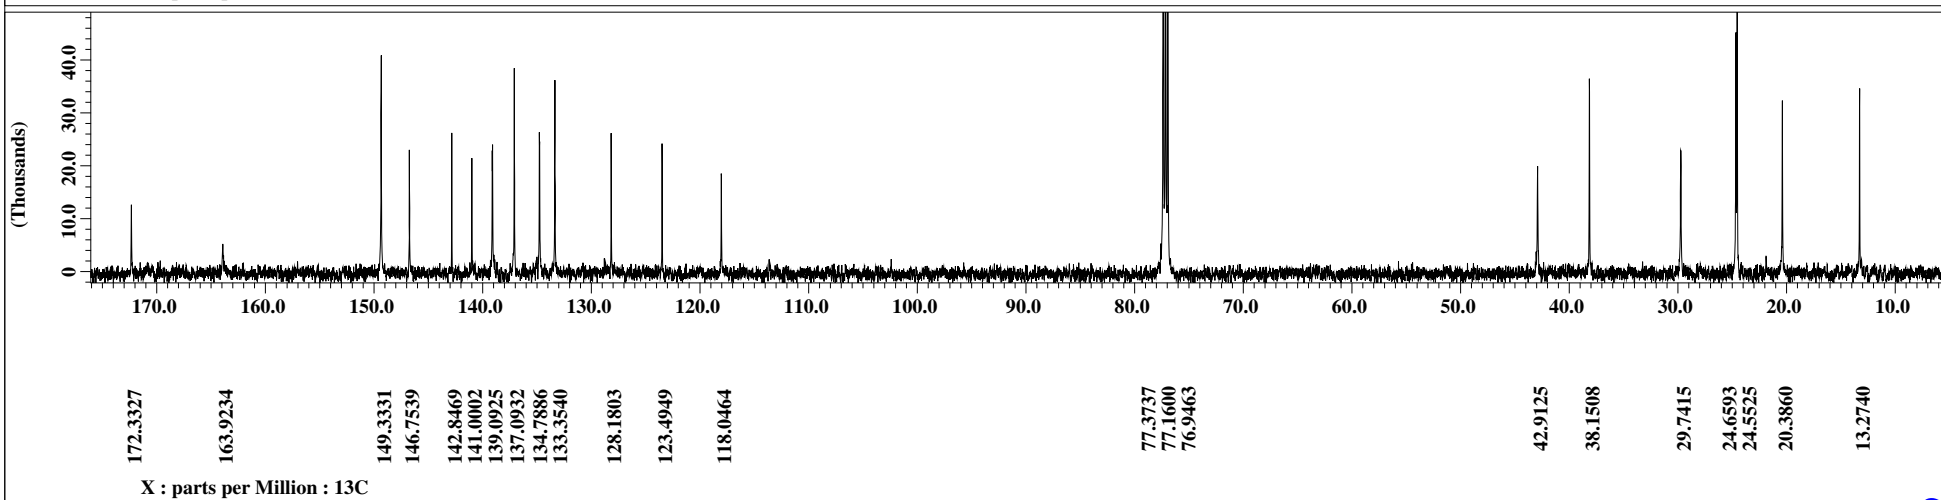

SS6 DEPT spectrum of muriceidine A (1)

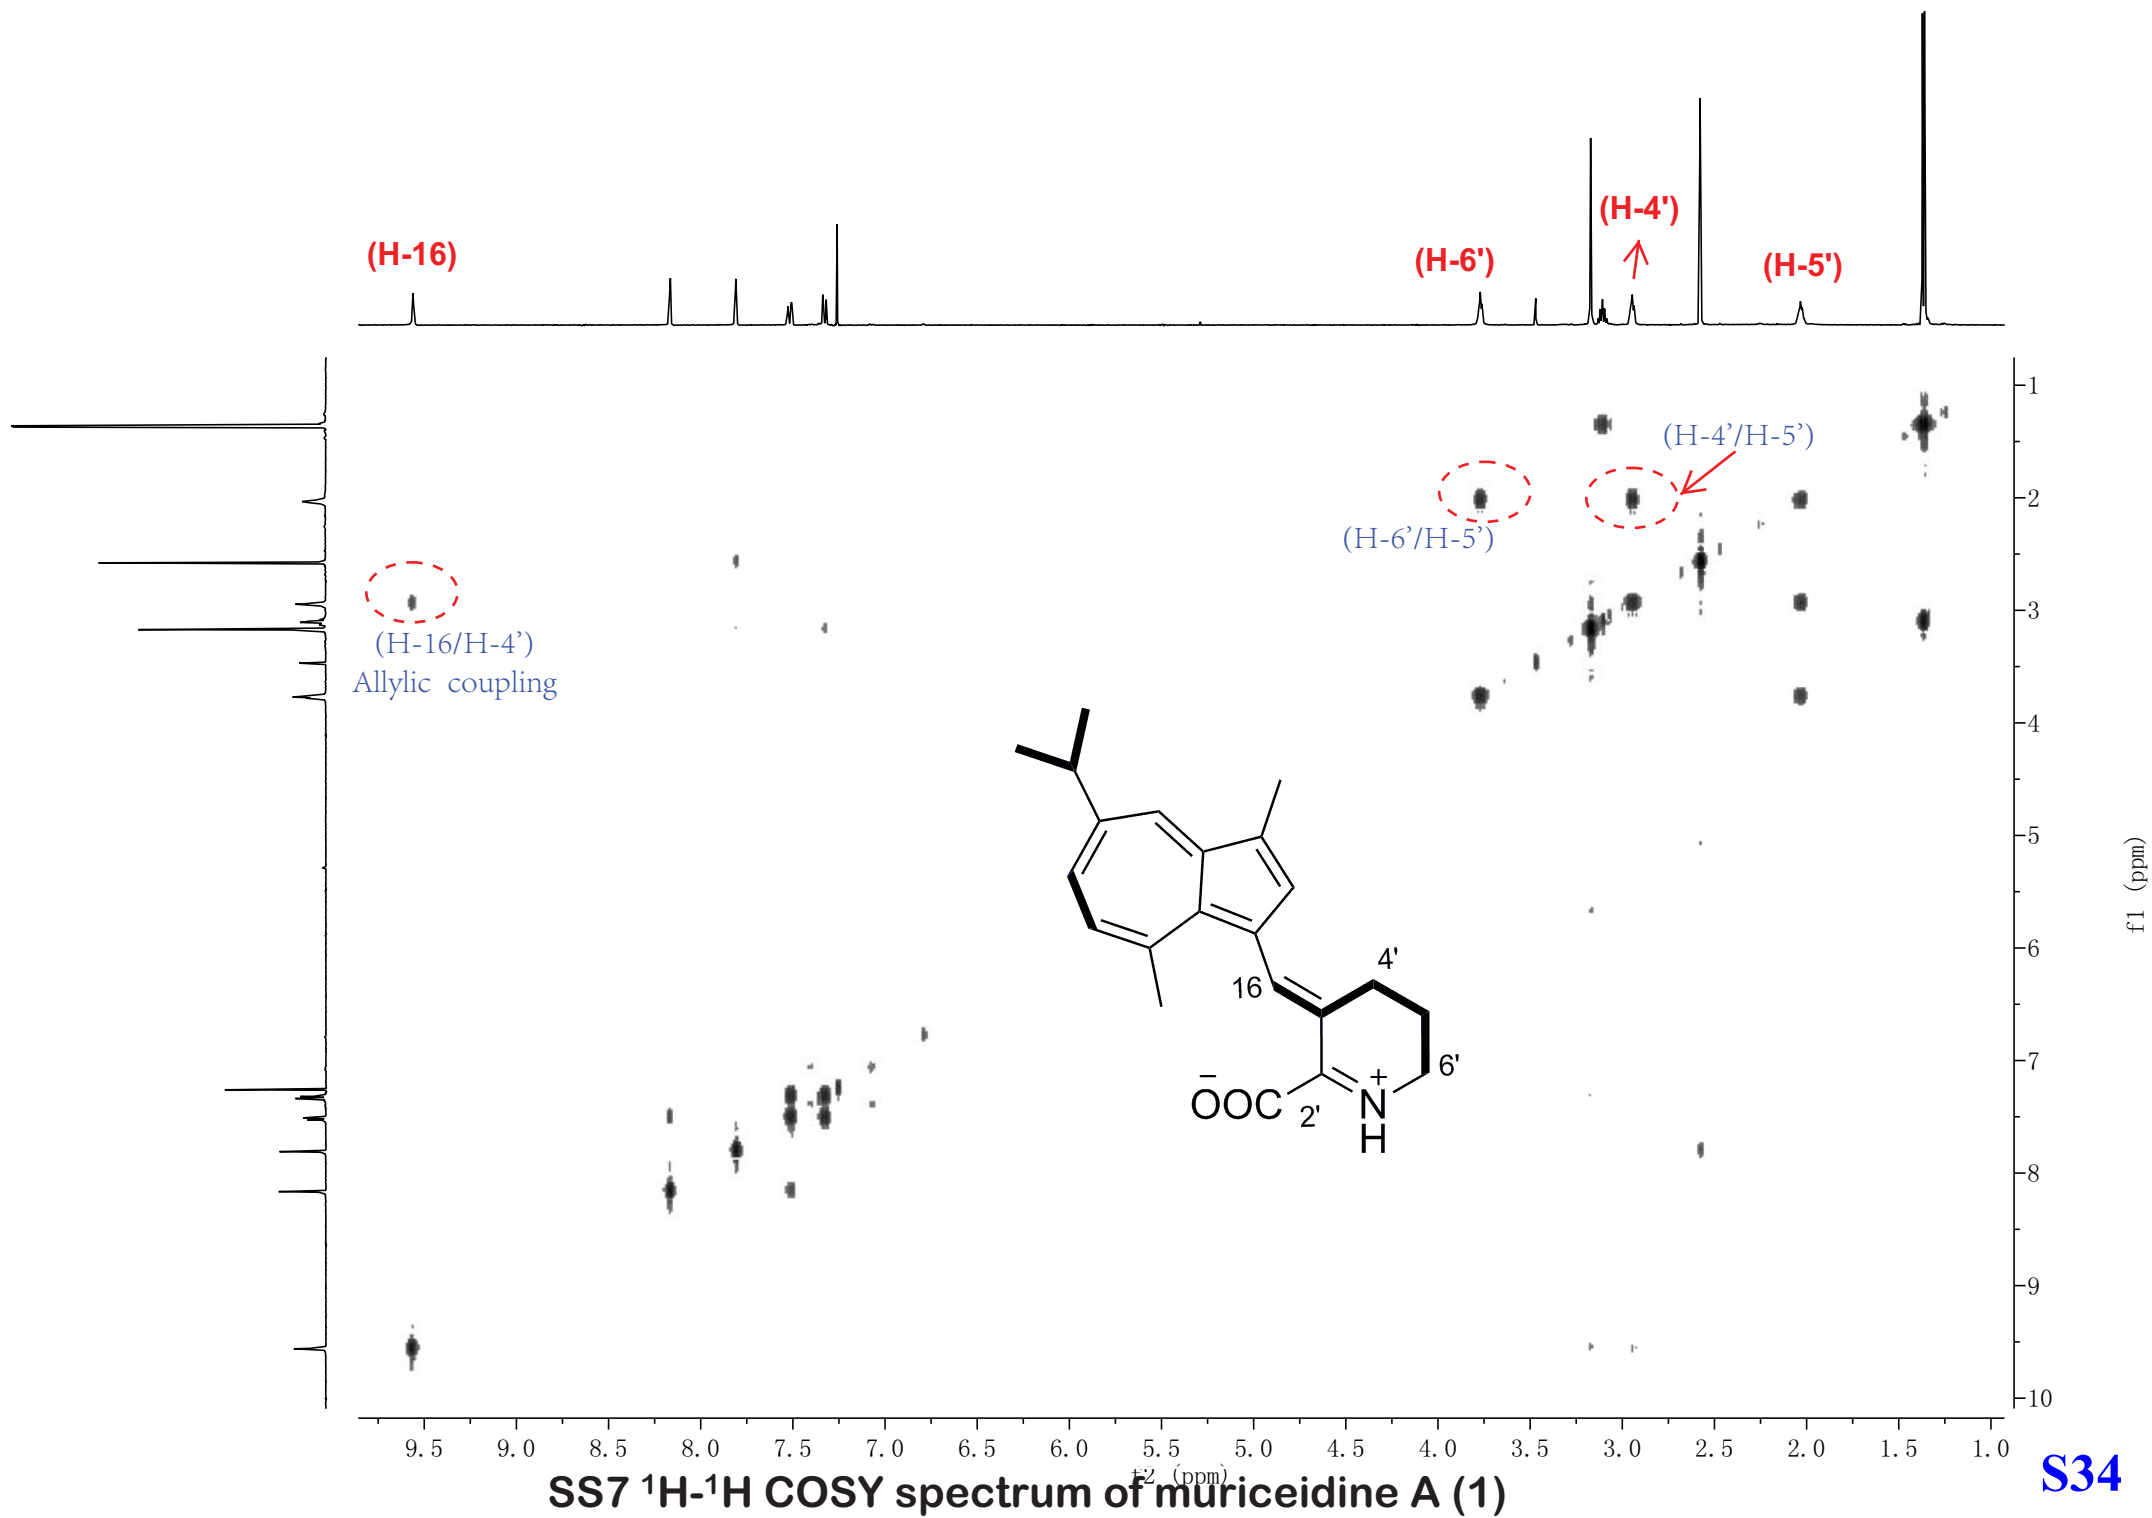

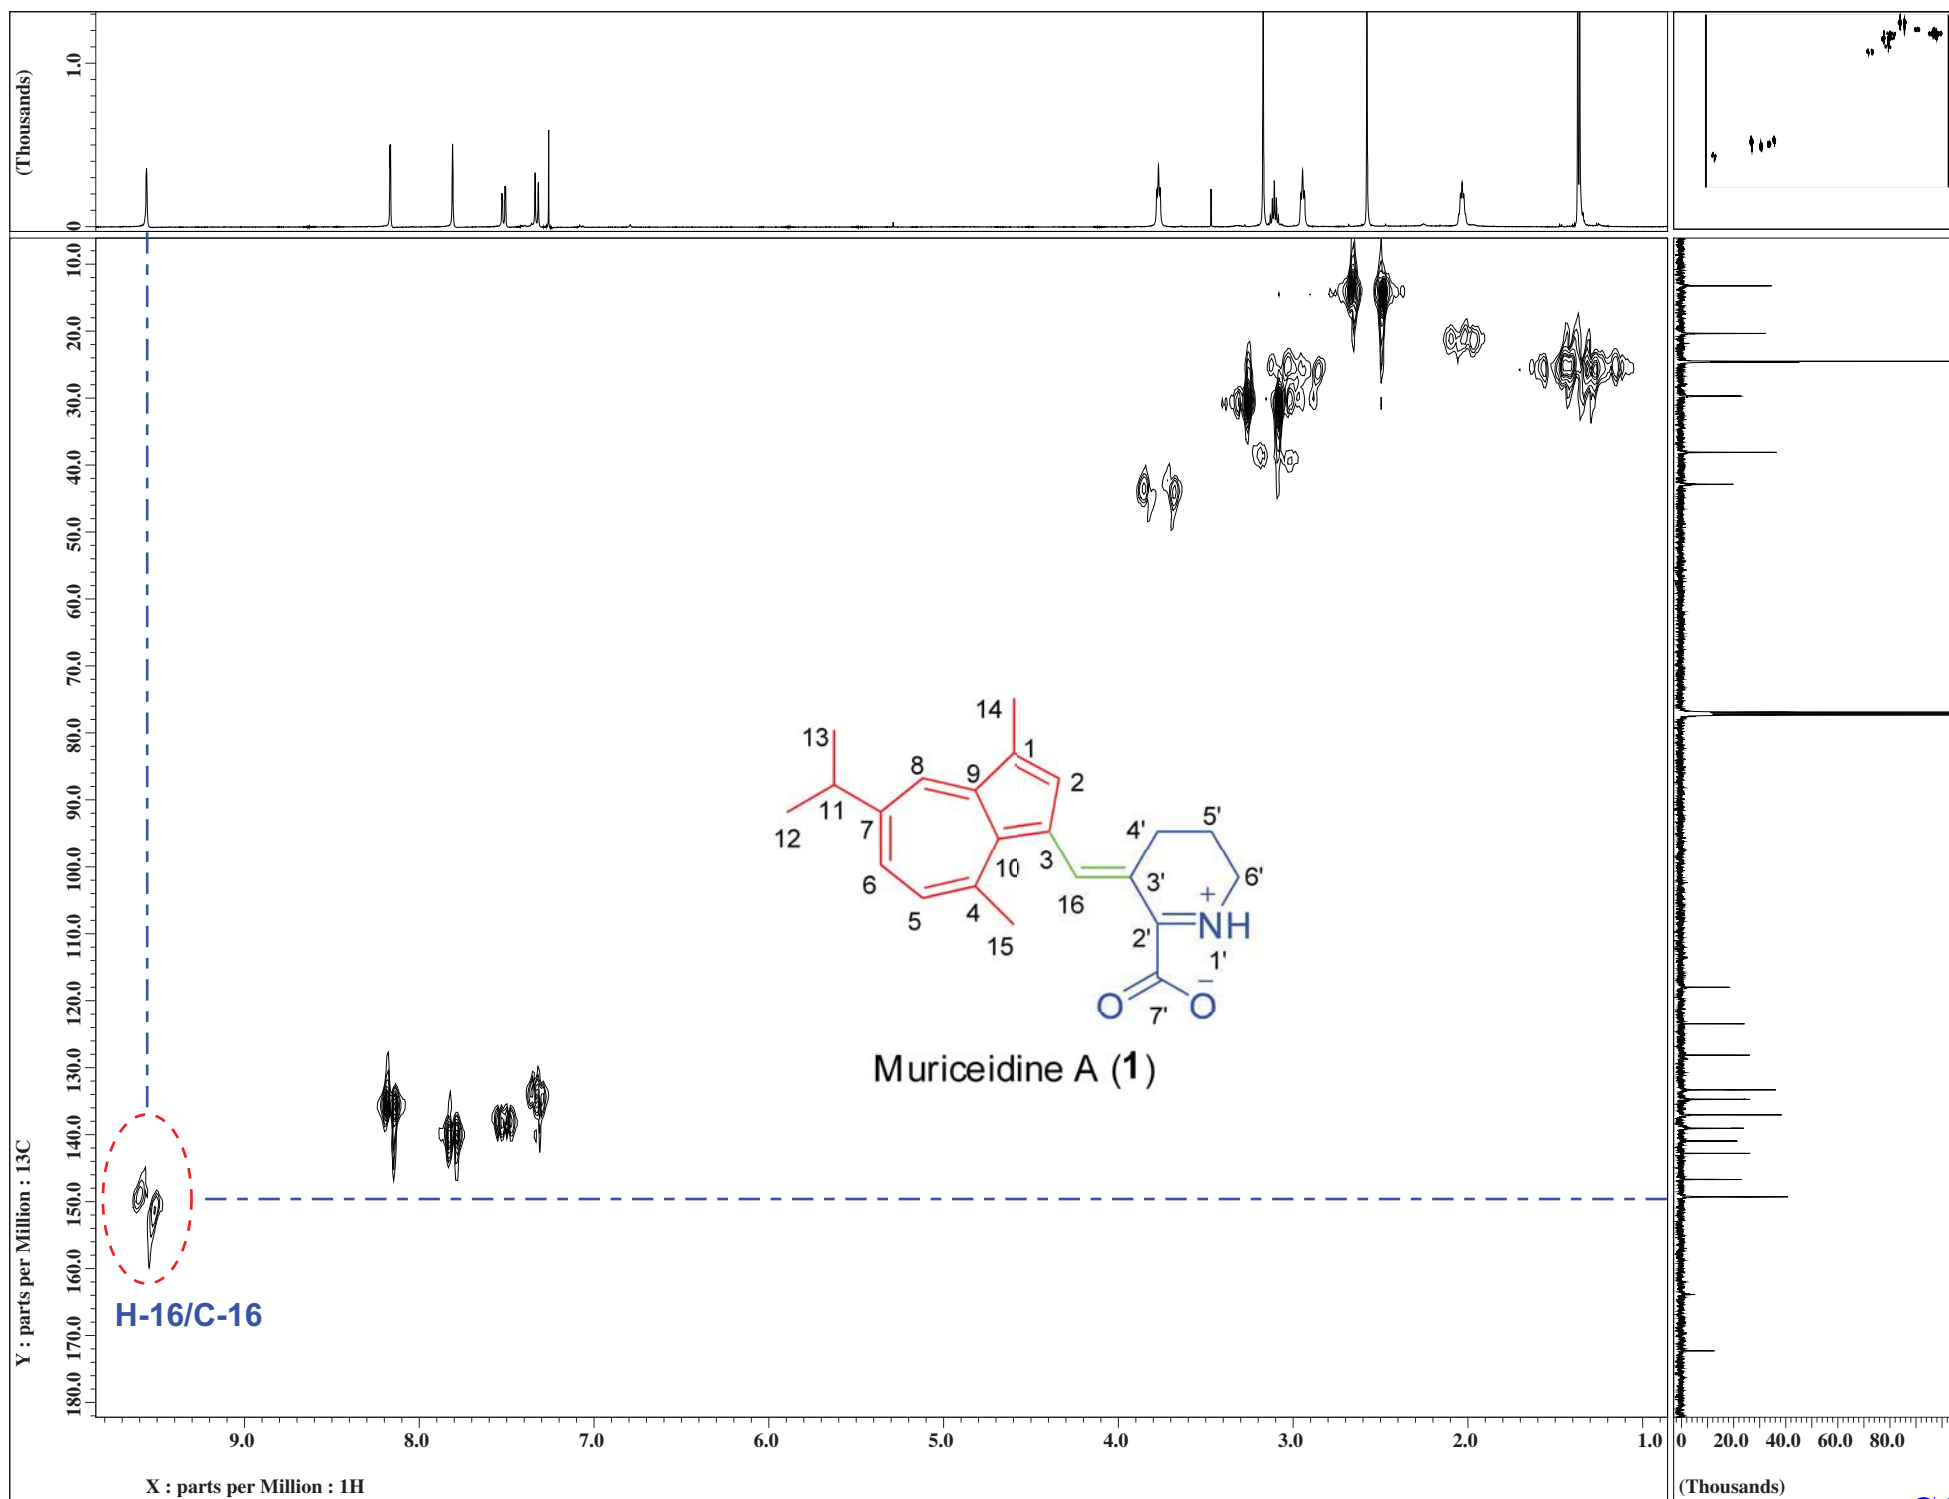

SS8 HMQC spectrum of muriceidine A (1)

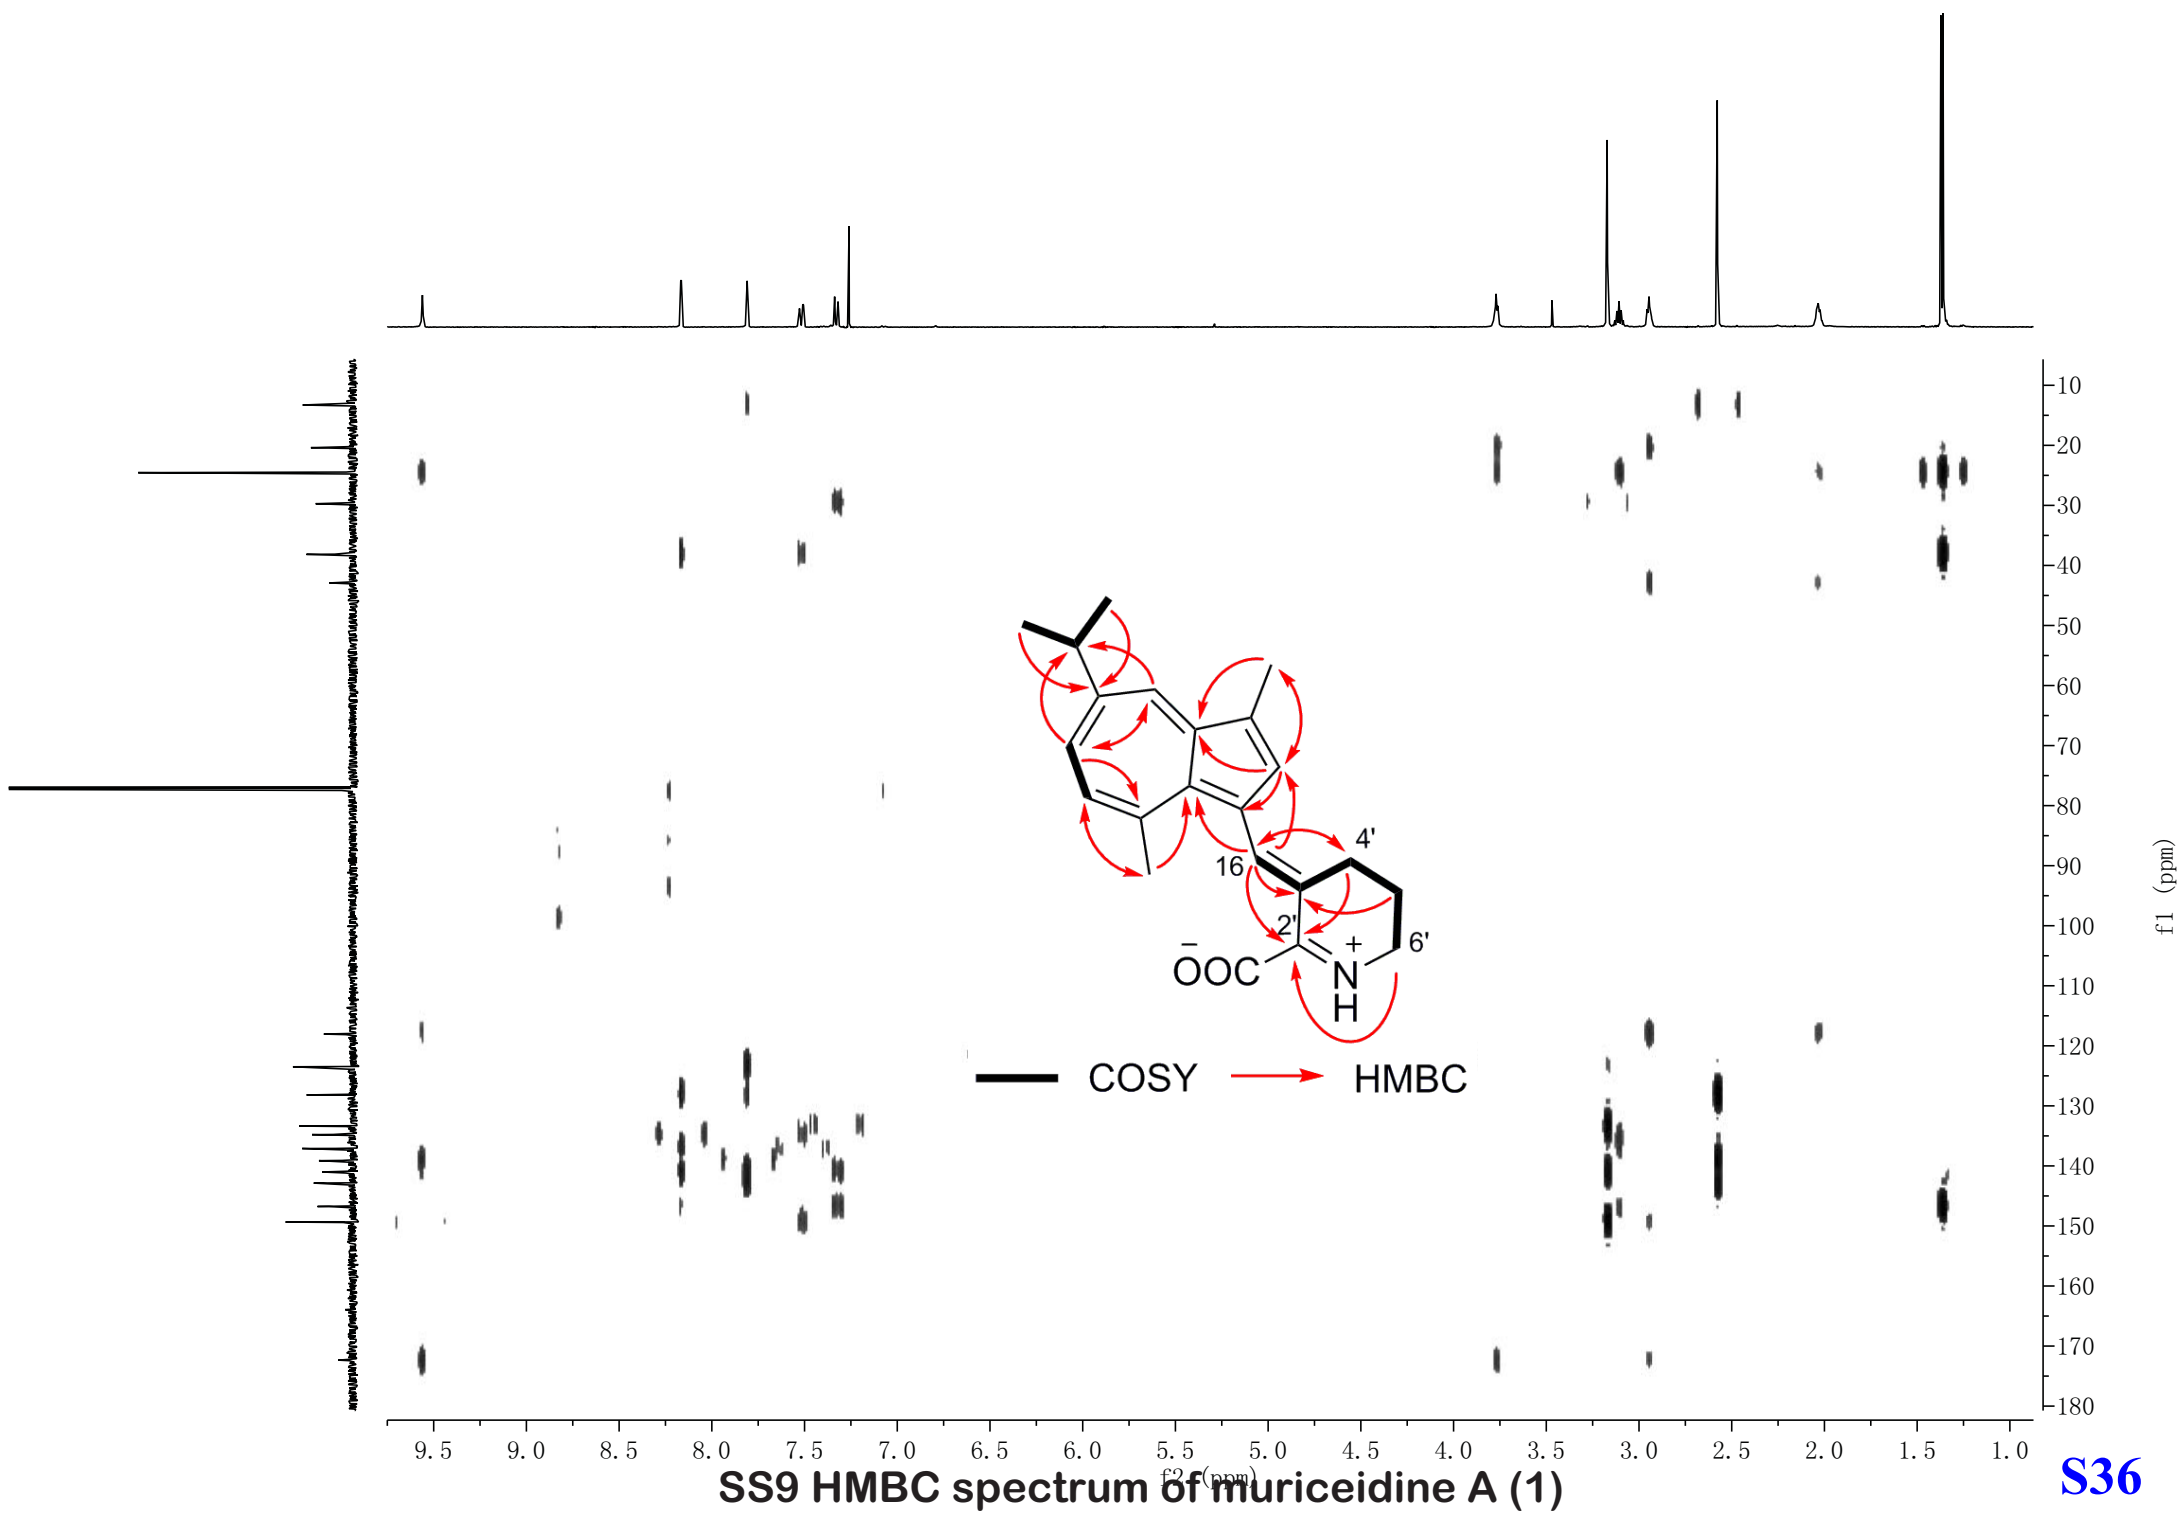

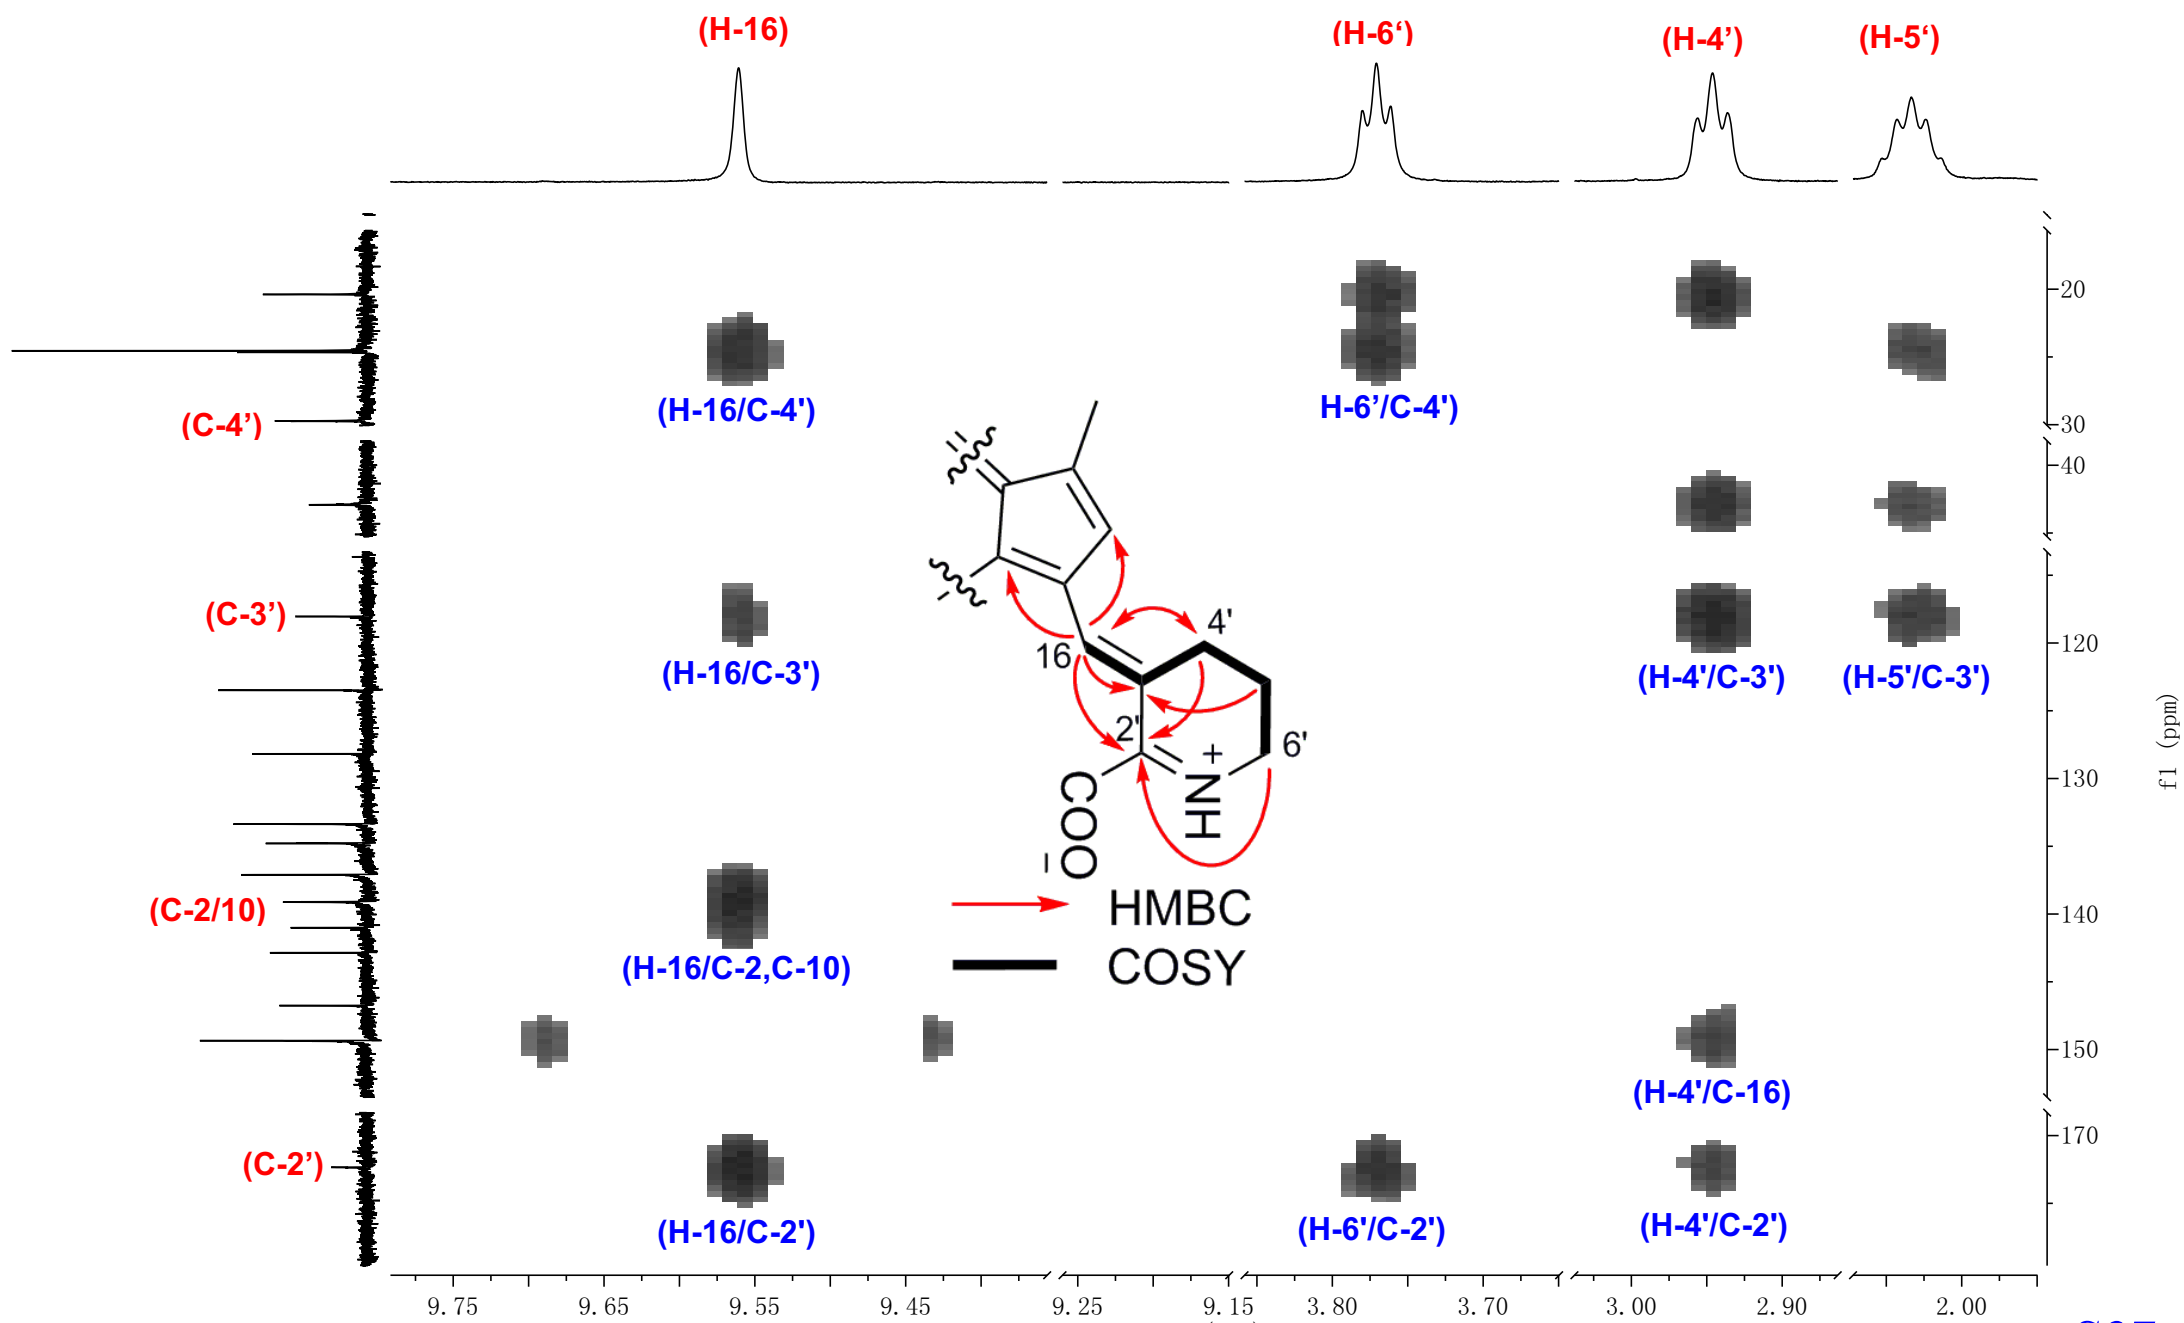

SS10 The key amplificatory HMBC spectrum of muriceidine A (1)

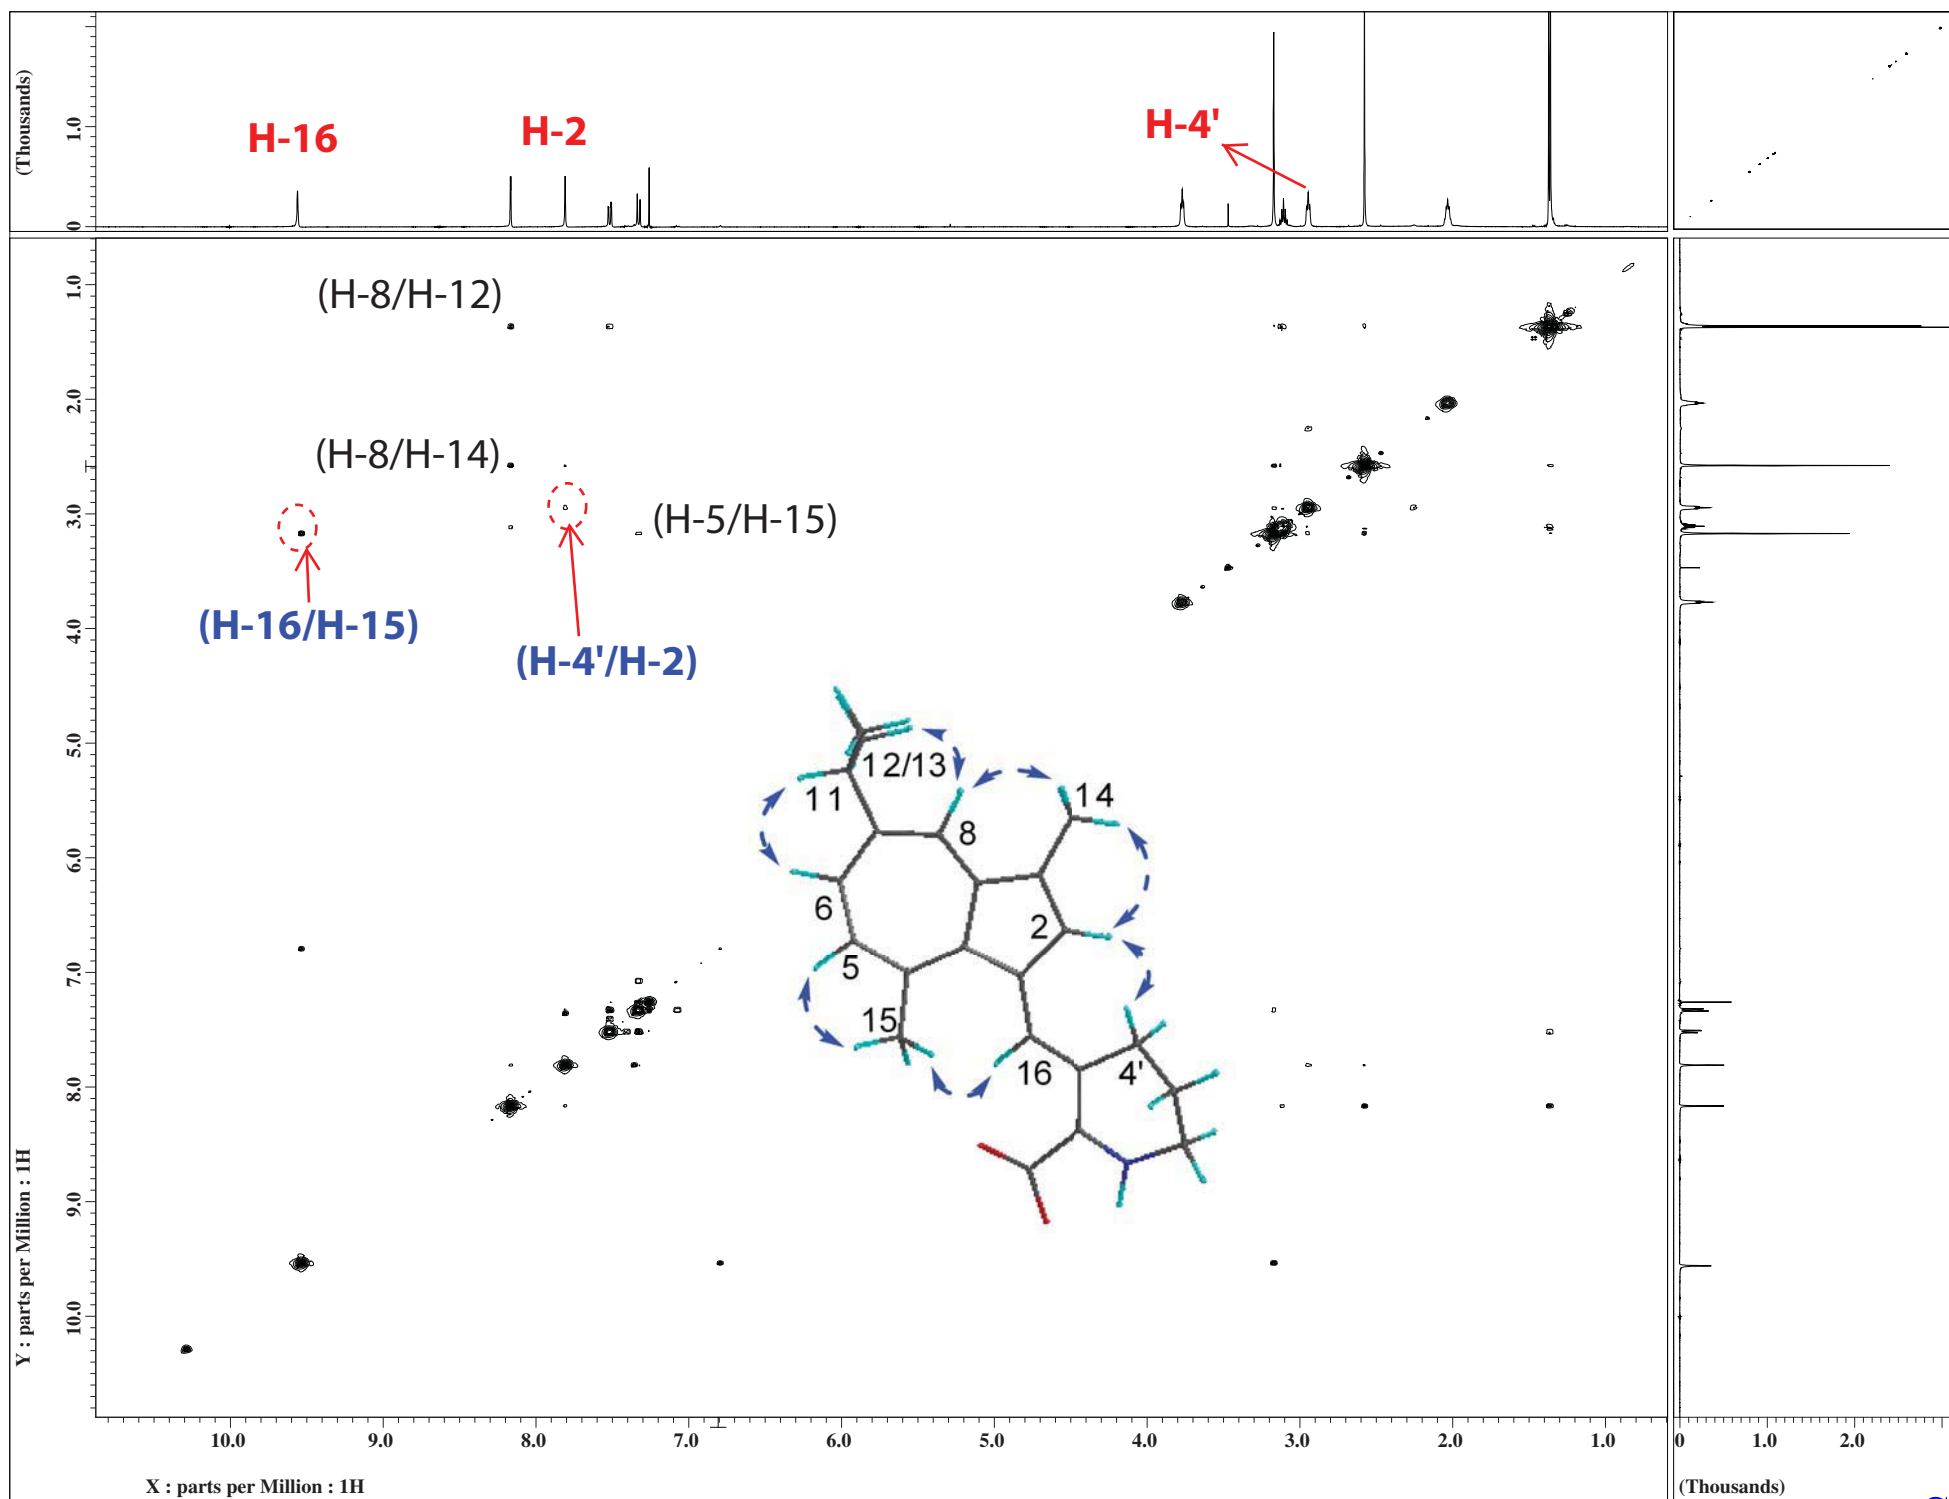

SS11 NOESY spectrum of muriceidine A (1)

ZHY-11-4-1

20120705-ZHY-11-4-1 131 (2.481) Sm (Mn, 2x3.00)

TOF MS ES+  
837

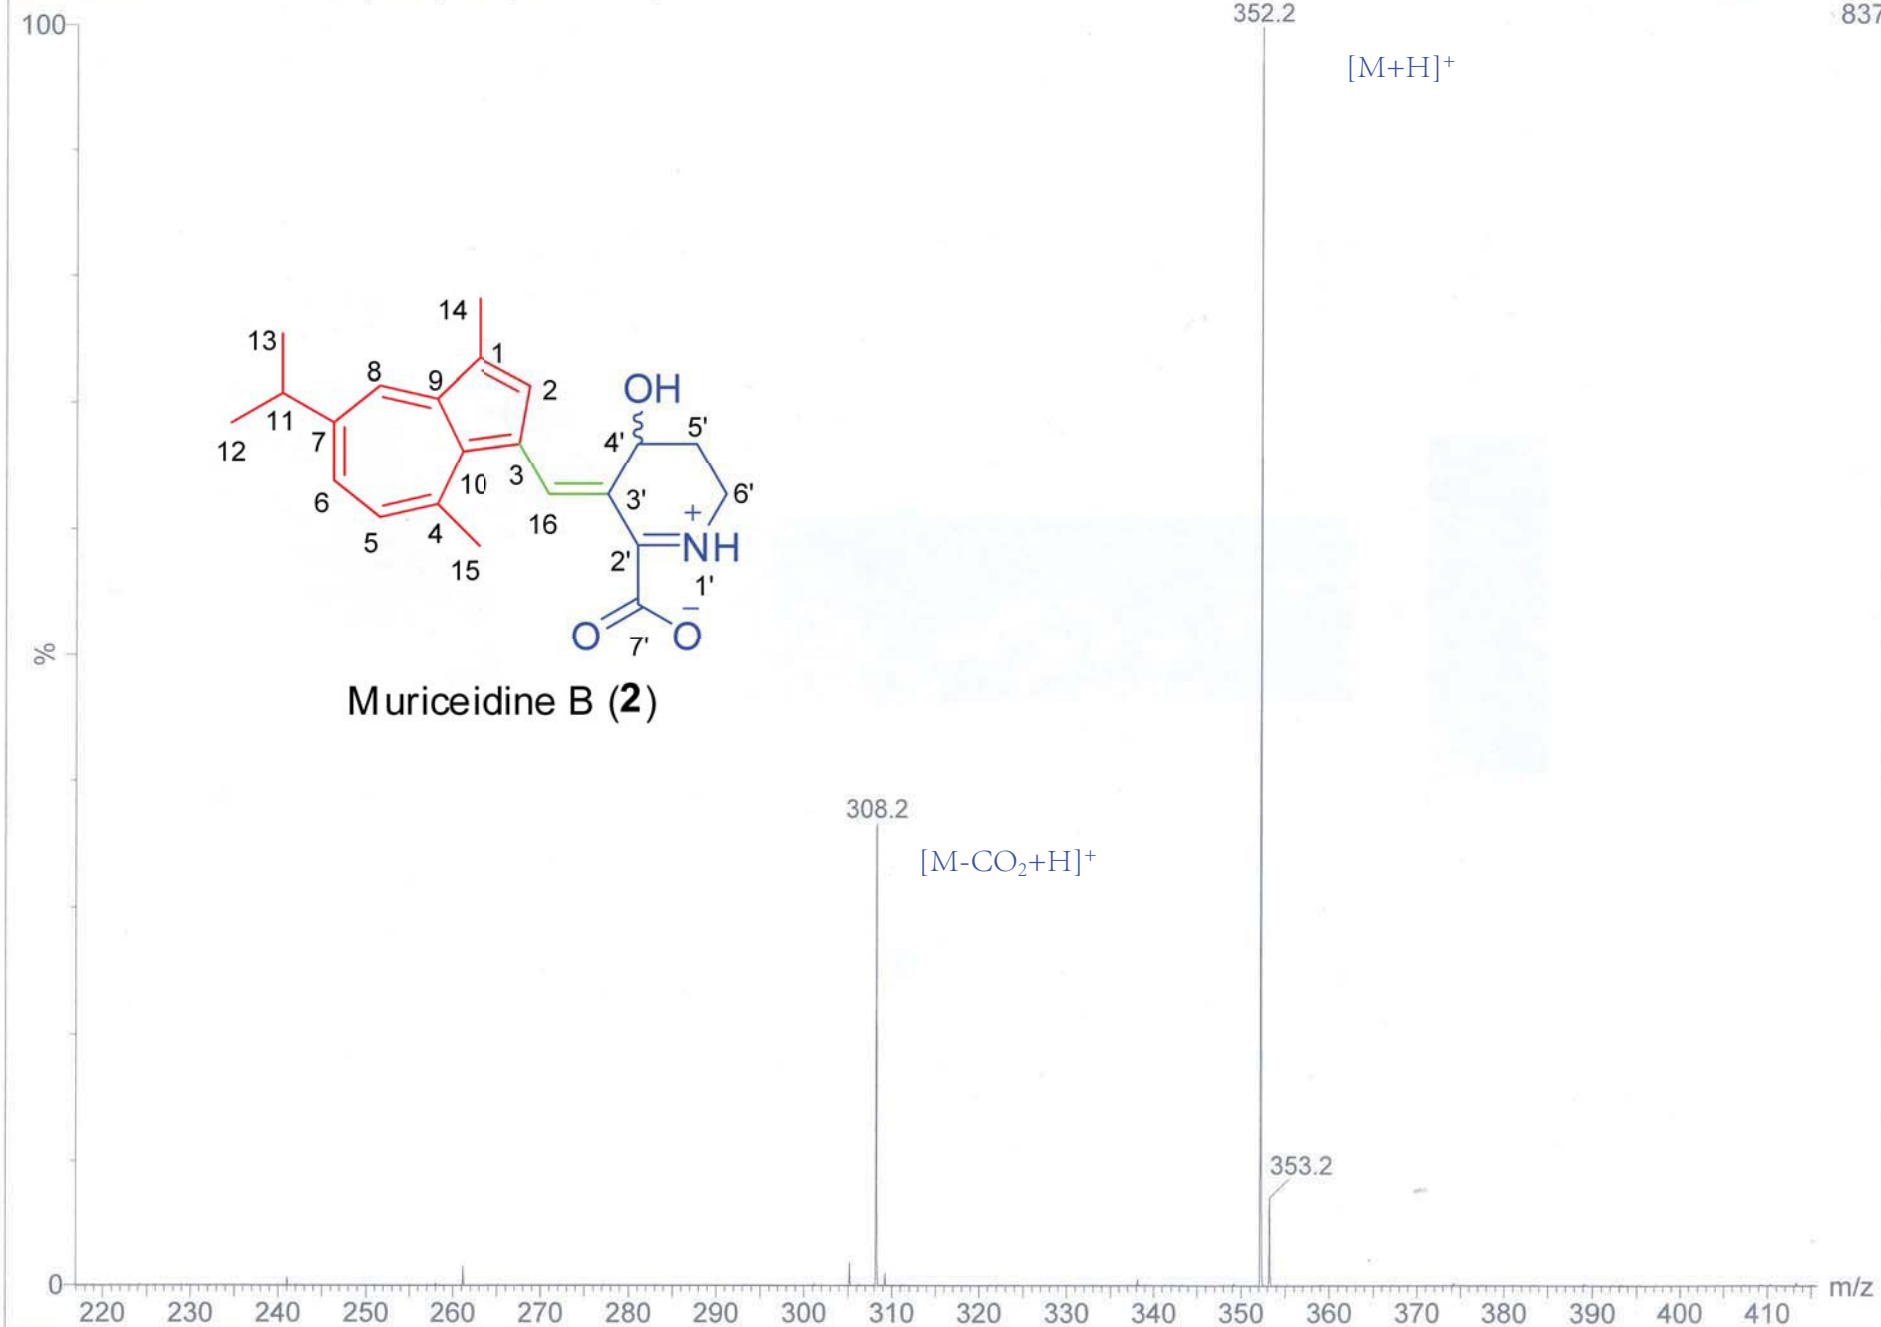

SS12 The positive ESIMS spectrum of muriceidine B (2)

20120706-ZHY-11-4-1\_120706105310 #28 RT: 0.27 AV: 1 NL: 4.16E6  
T: FTMS + c ESI Full ms [60.00-1500.00]

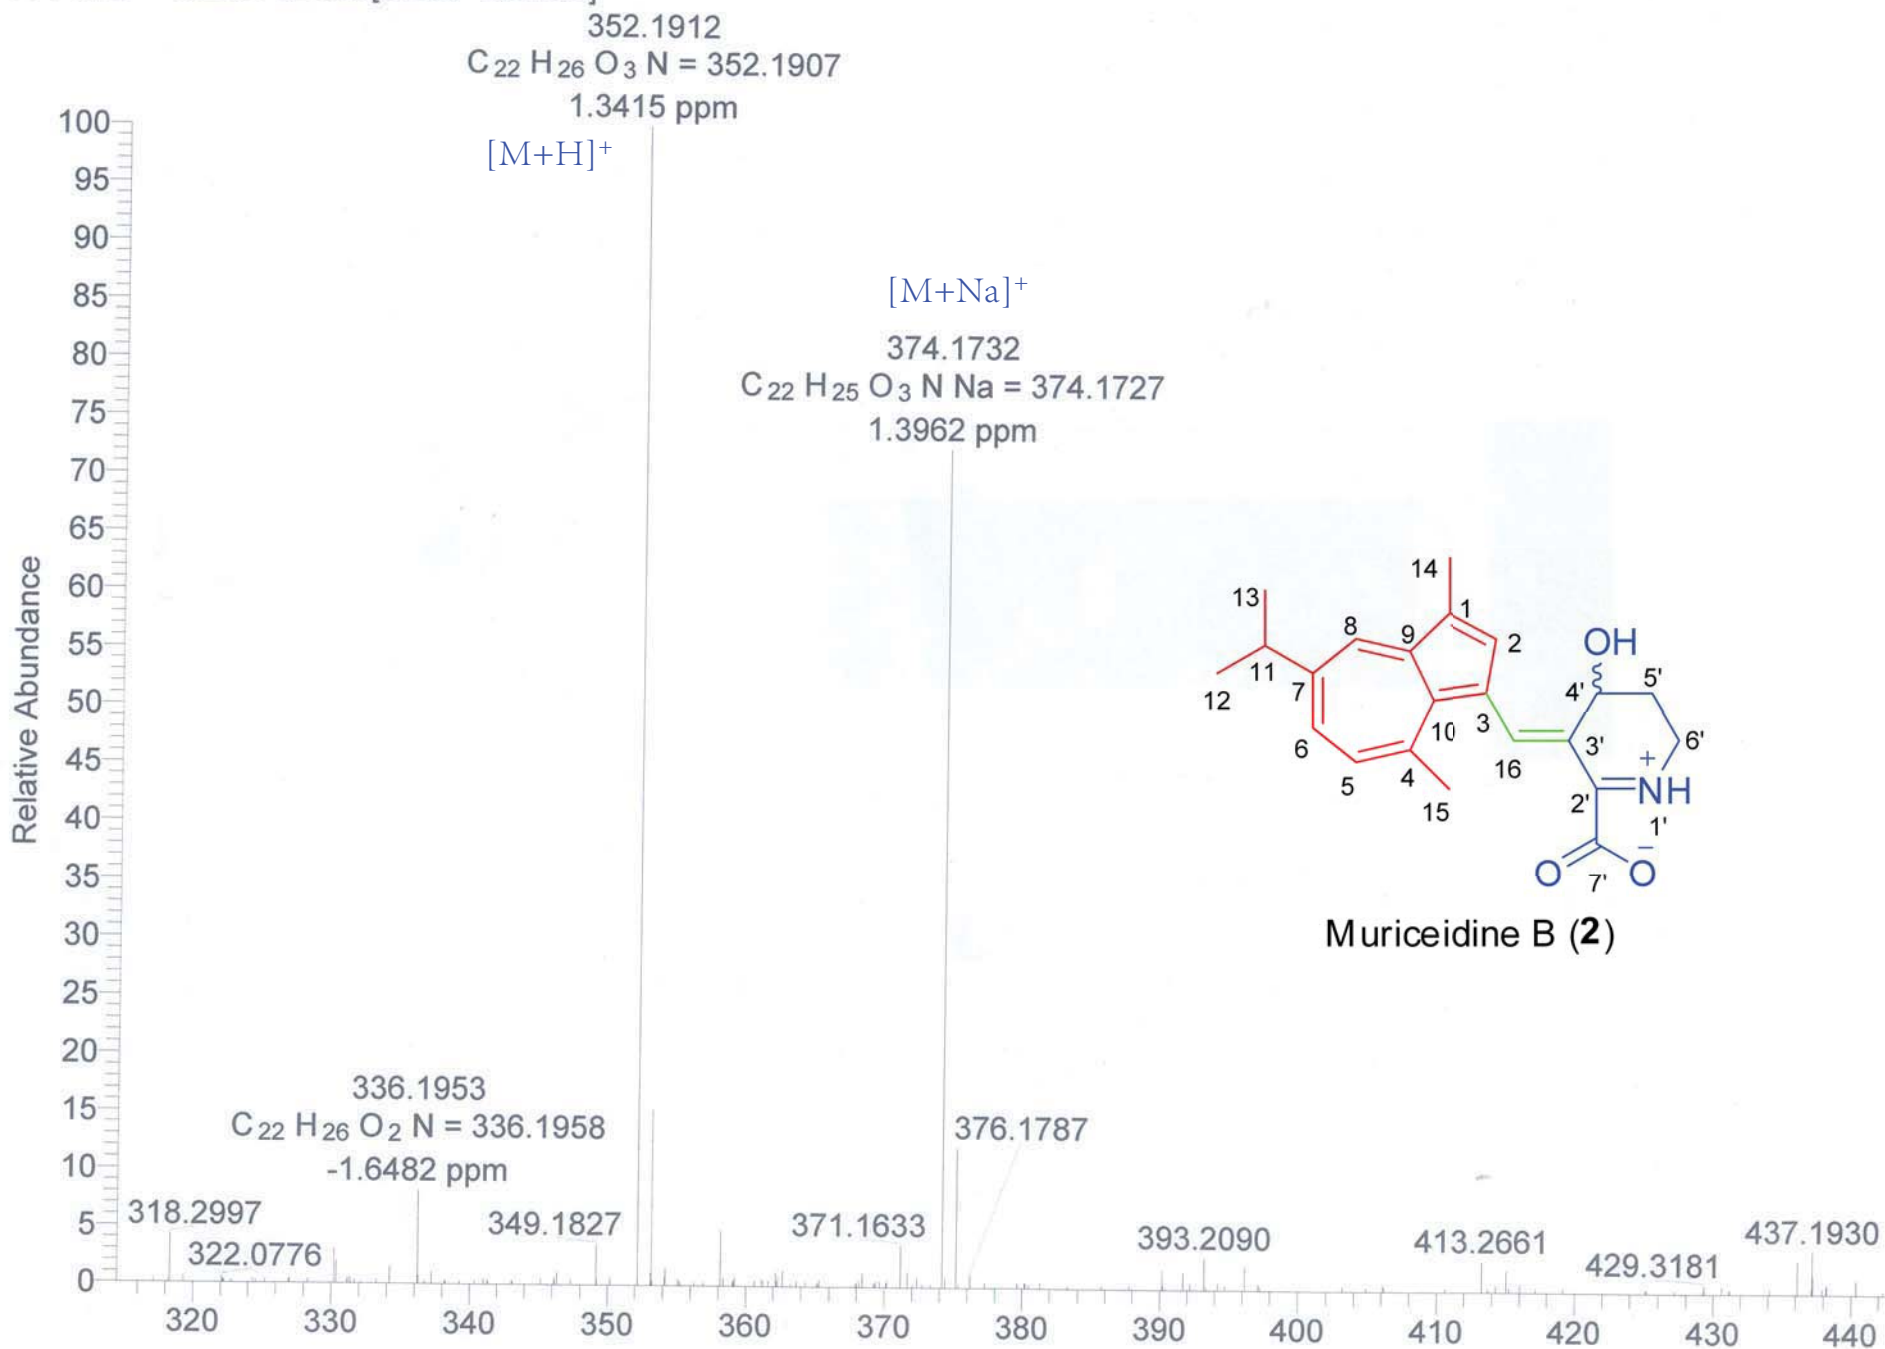

SS13 The positive HR/ESI-MS spectrum of muriceidine B (2)



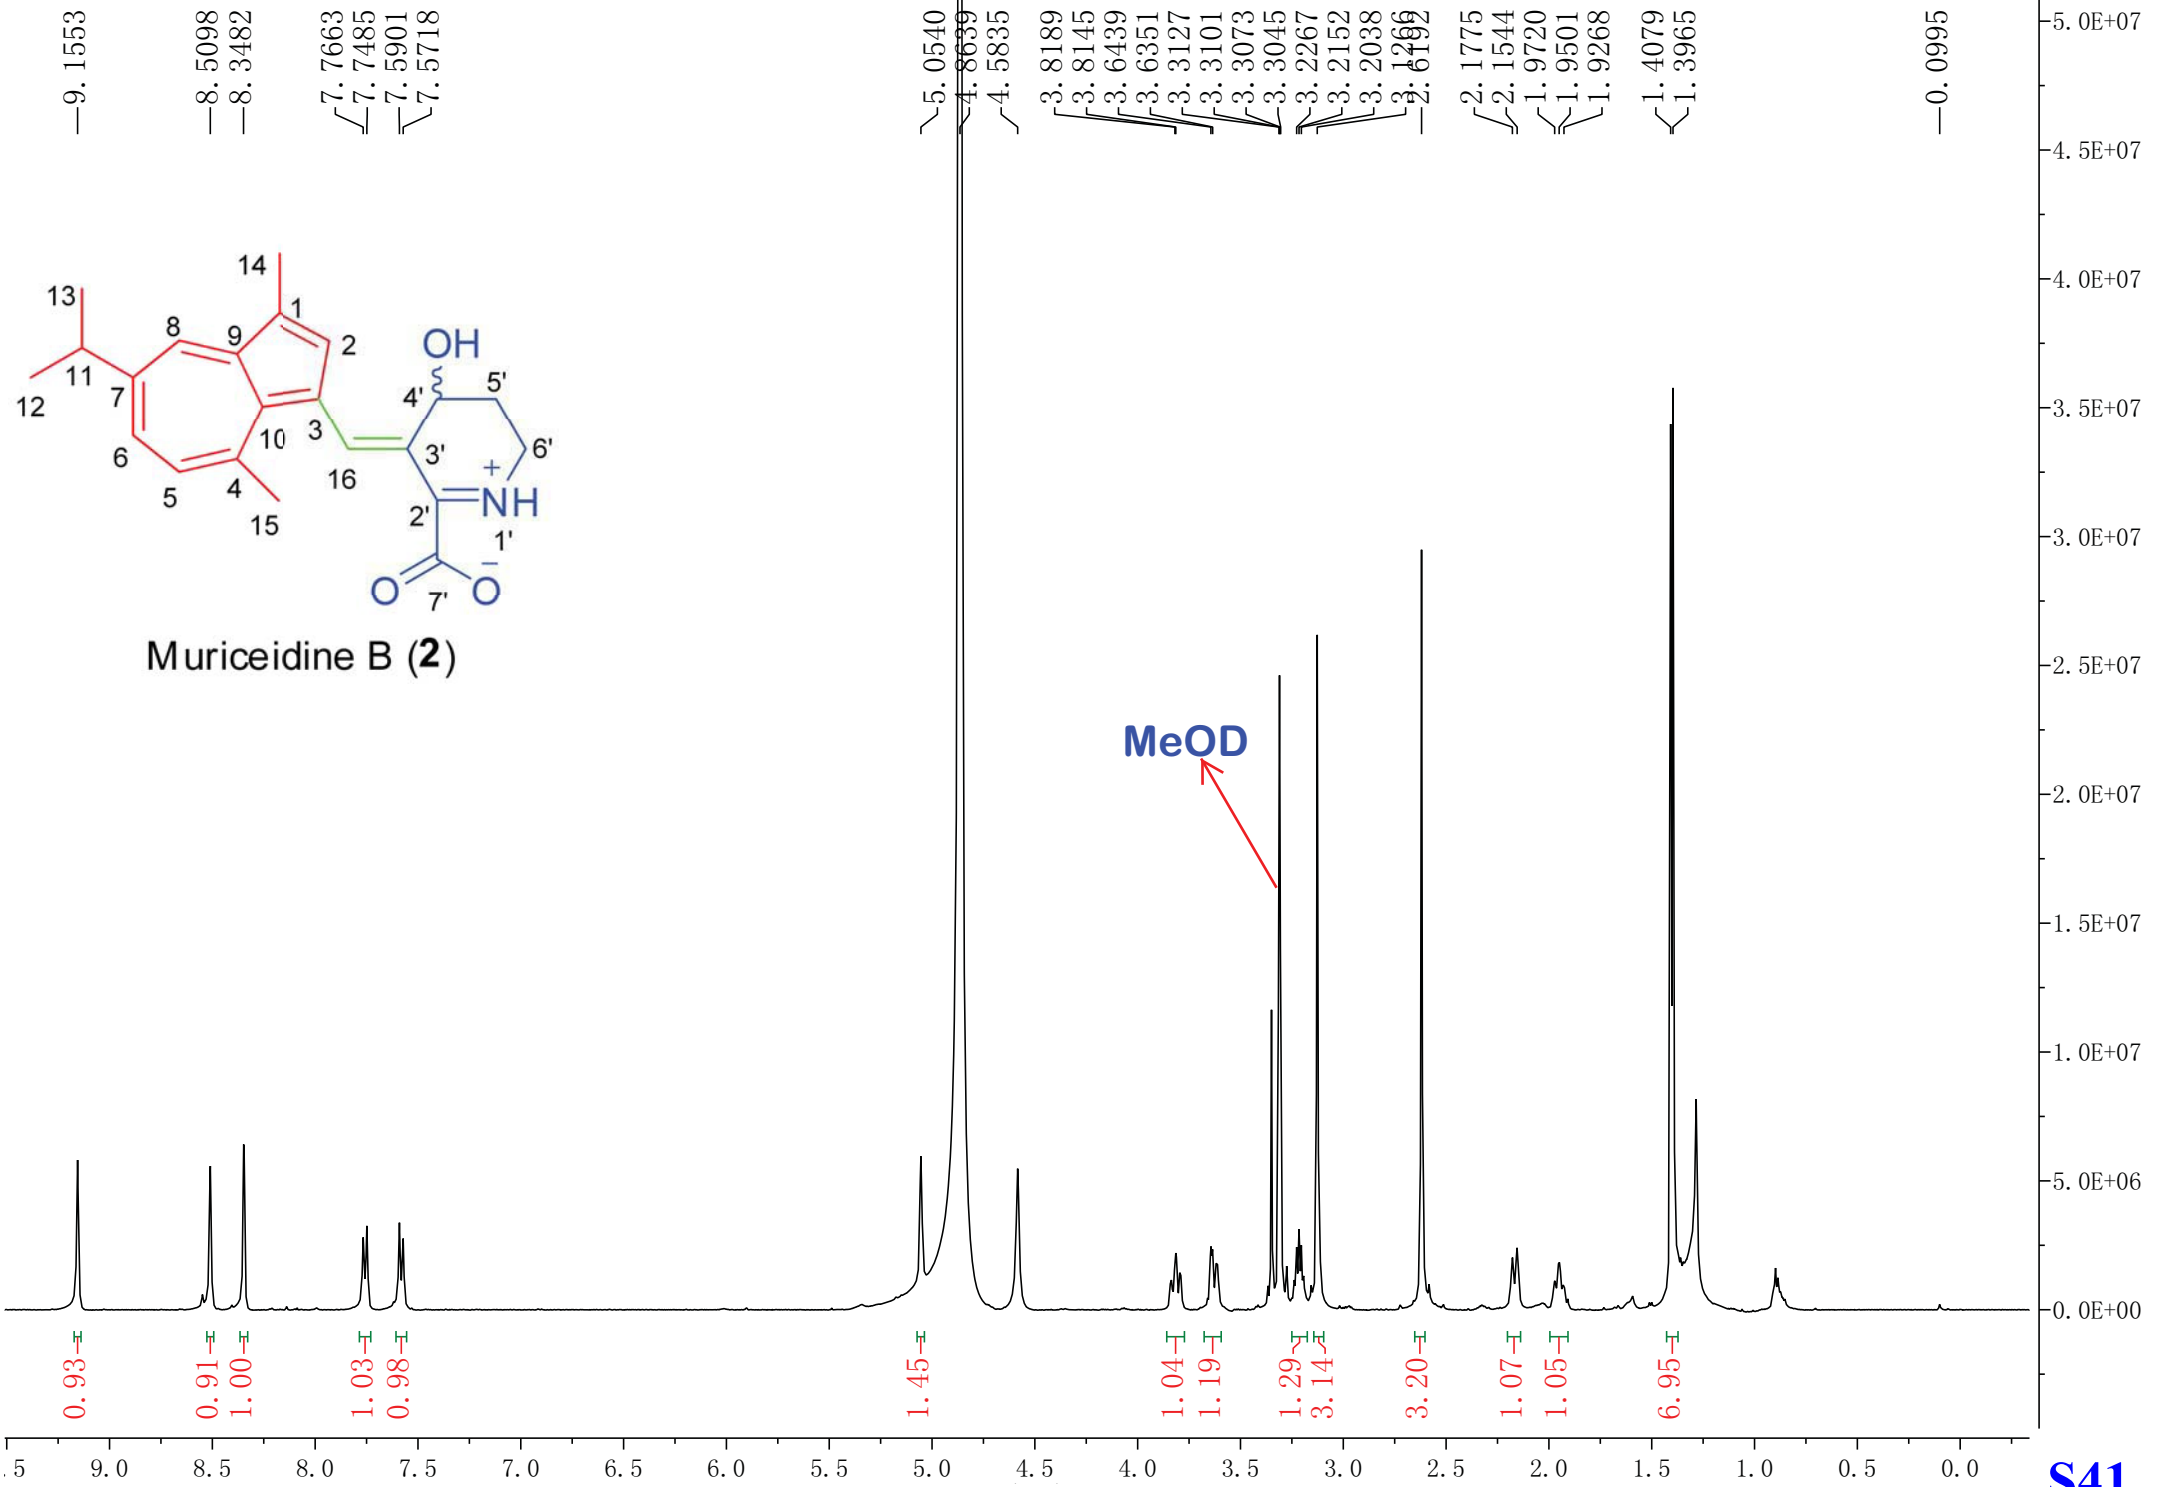

SS14 <sup>1</sup>H NMR (600 MHz, MeOD) spectrum of muriceidine B (2)

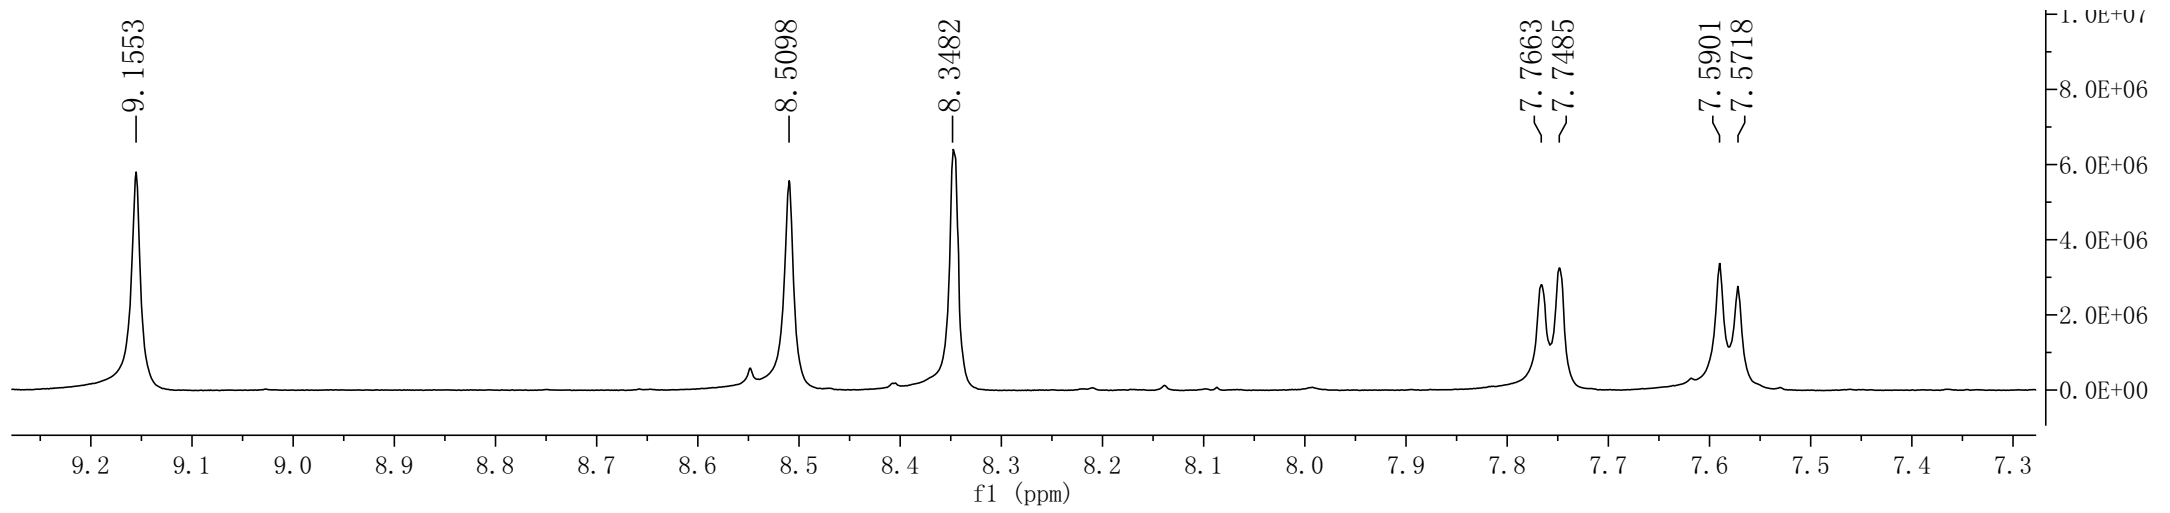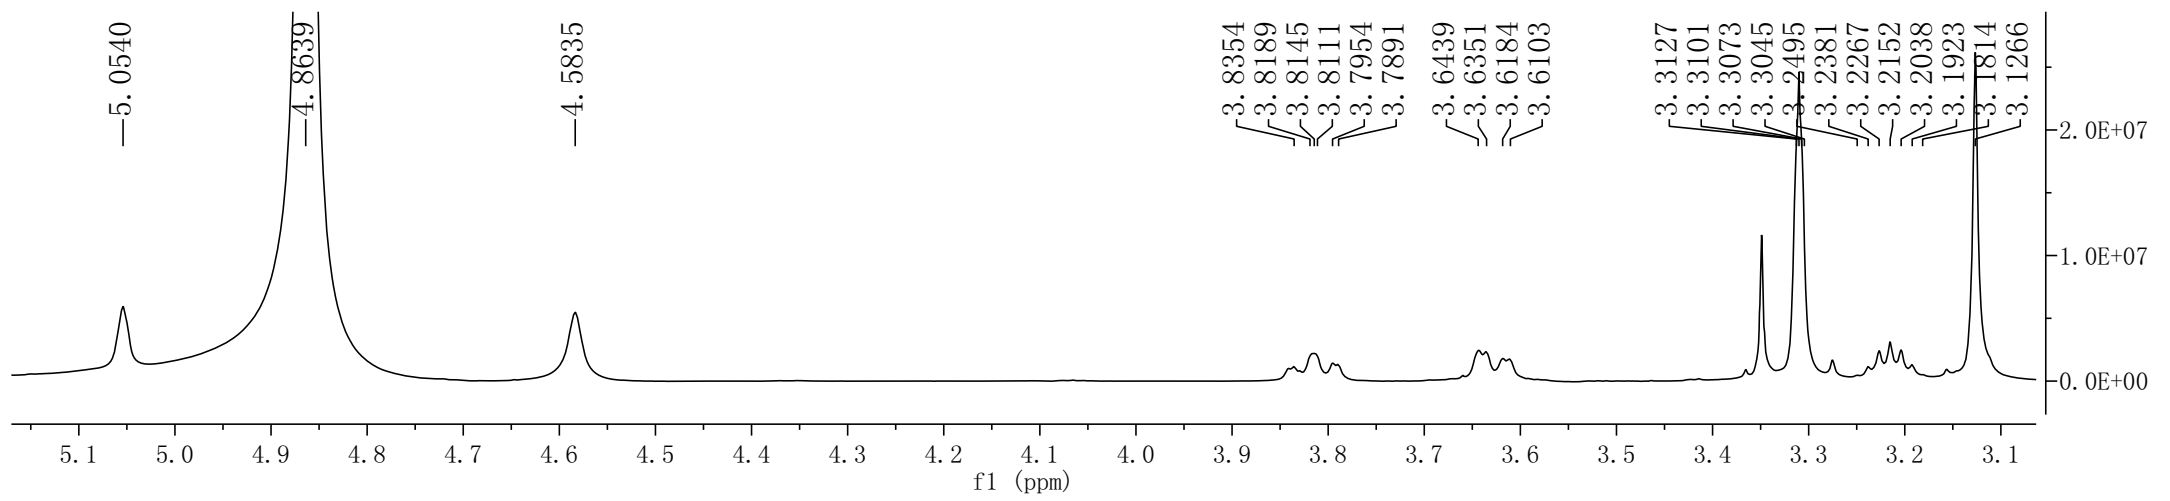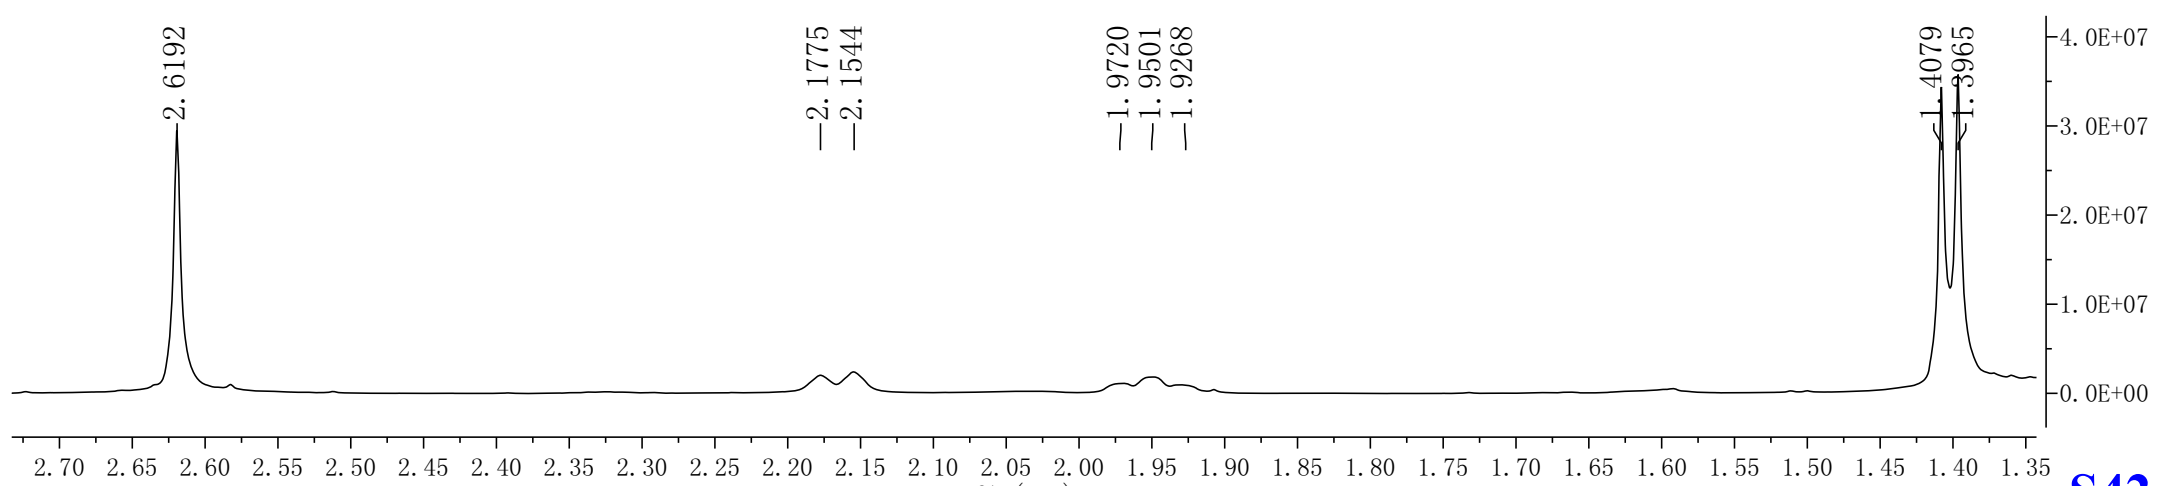

SS15 The amplificatory <sup>1</sup>H NMR spectrum of muriceidine B (2)

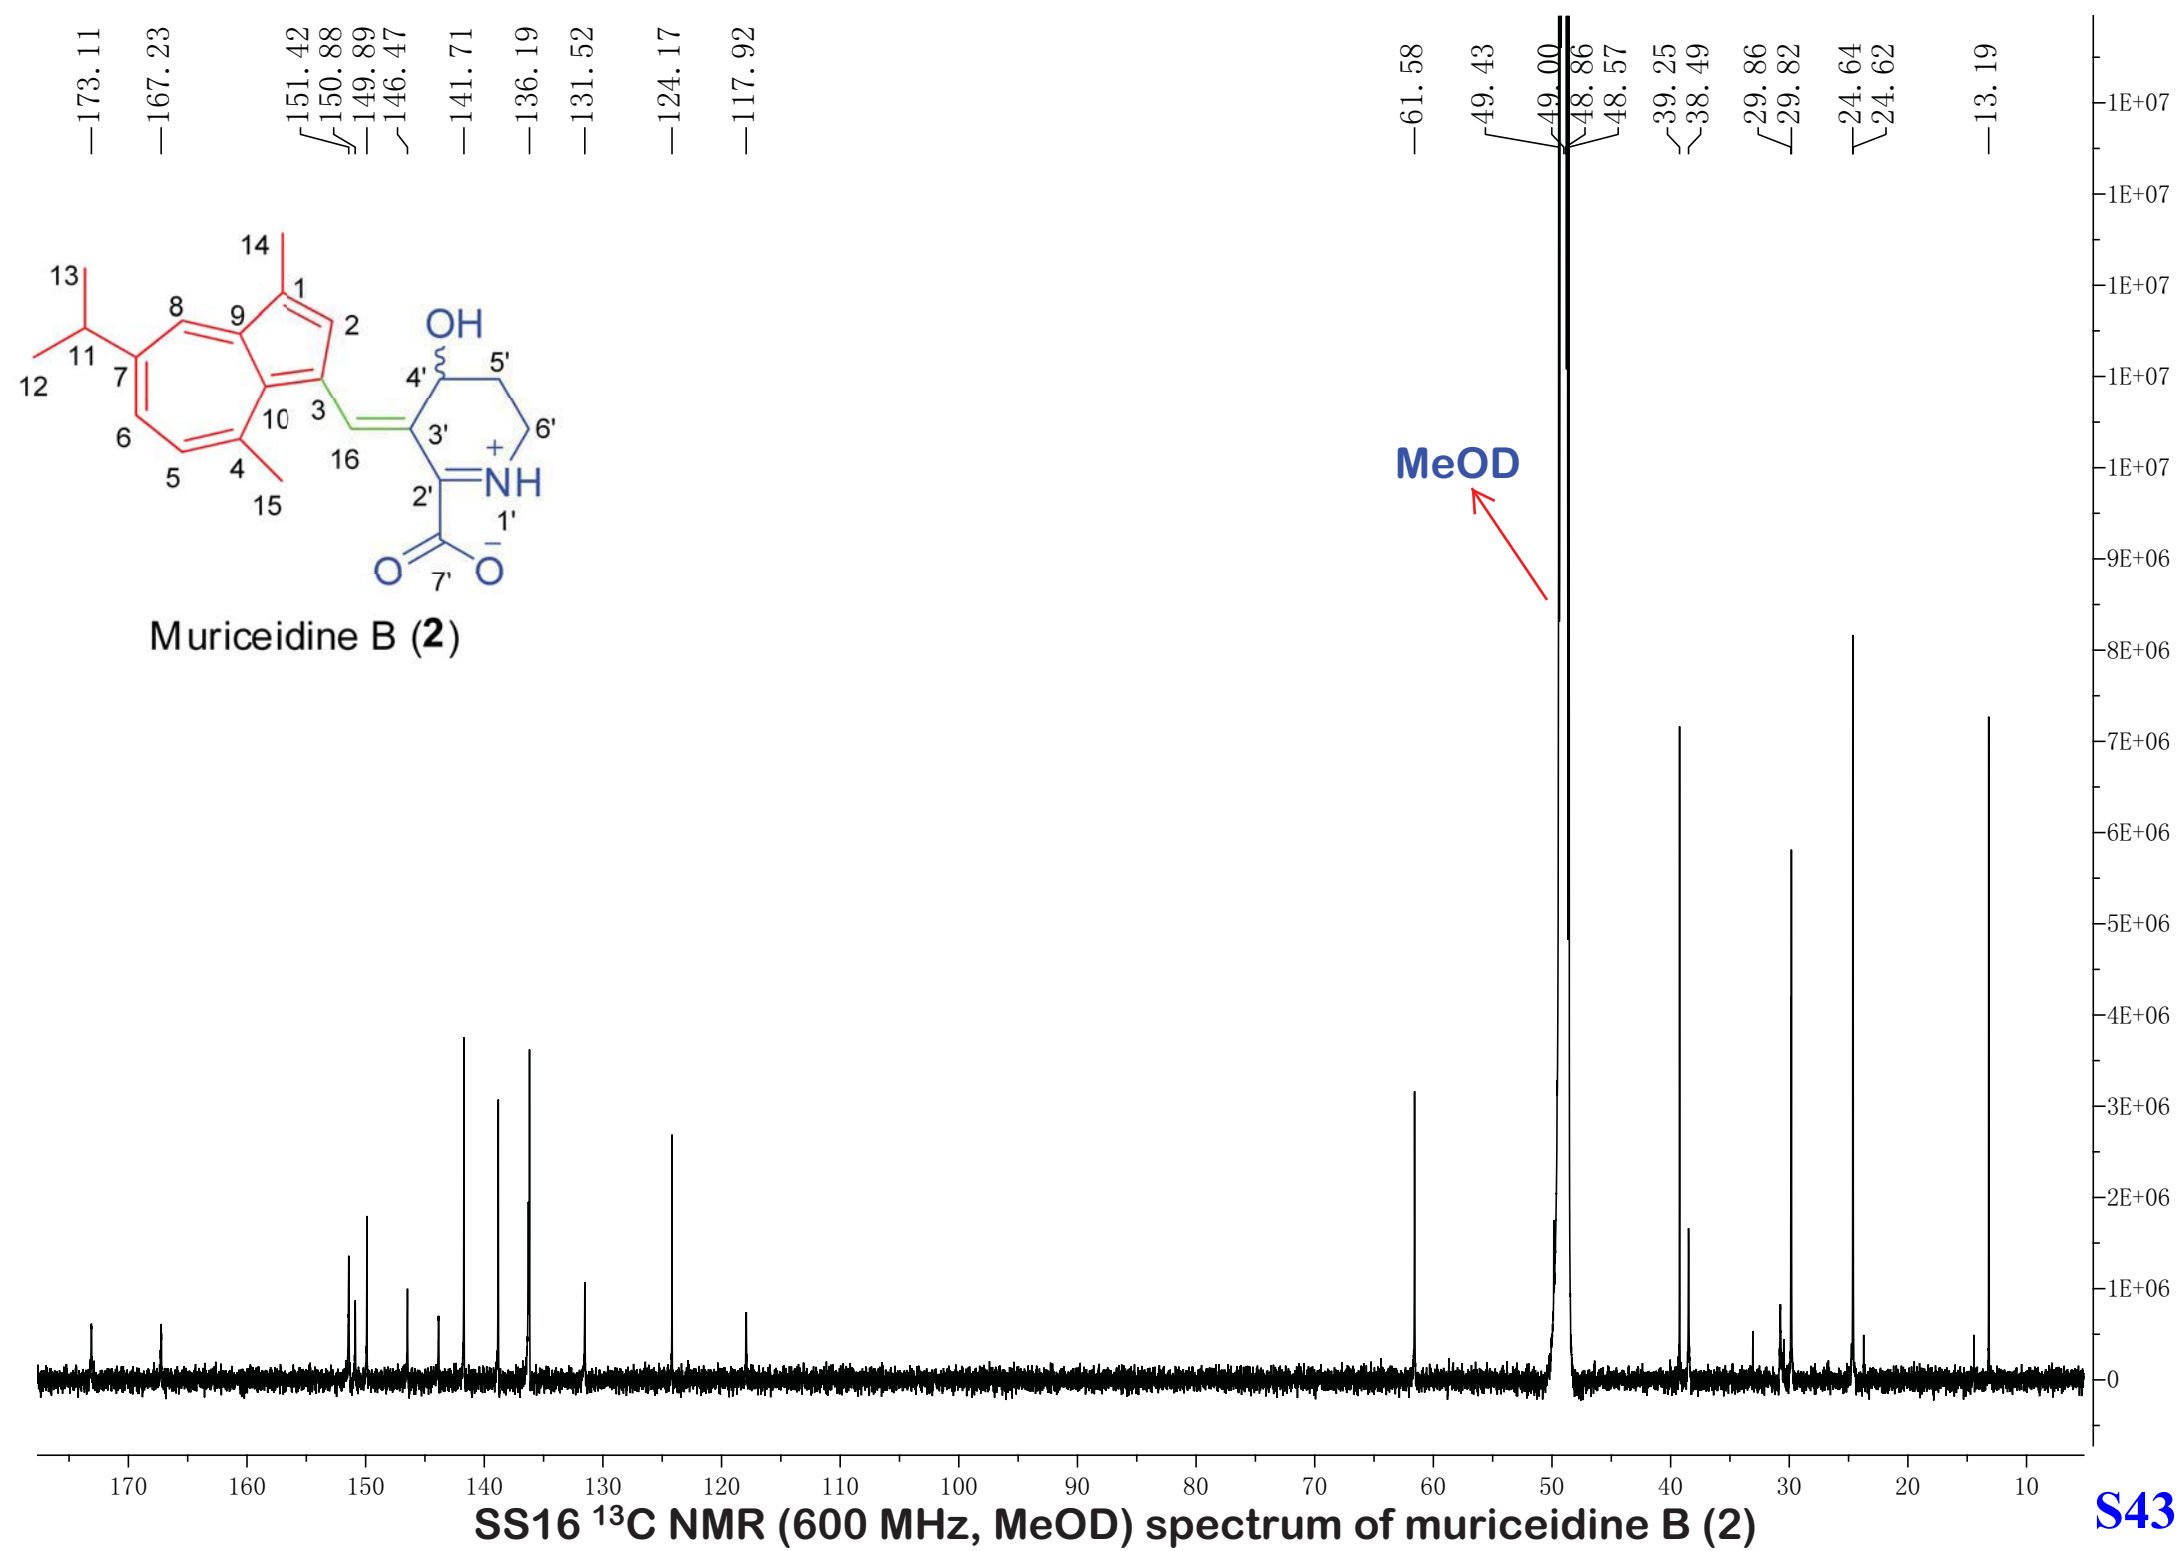

ZHY-11-4-1; DEPT90; MeOD

ZHY-11-4-1; DEPT135; MeOD

ZHY-11-4-1; <sup>13</sup>CNMR; MeOD

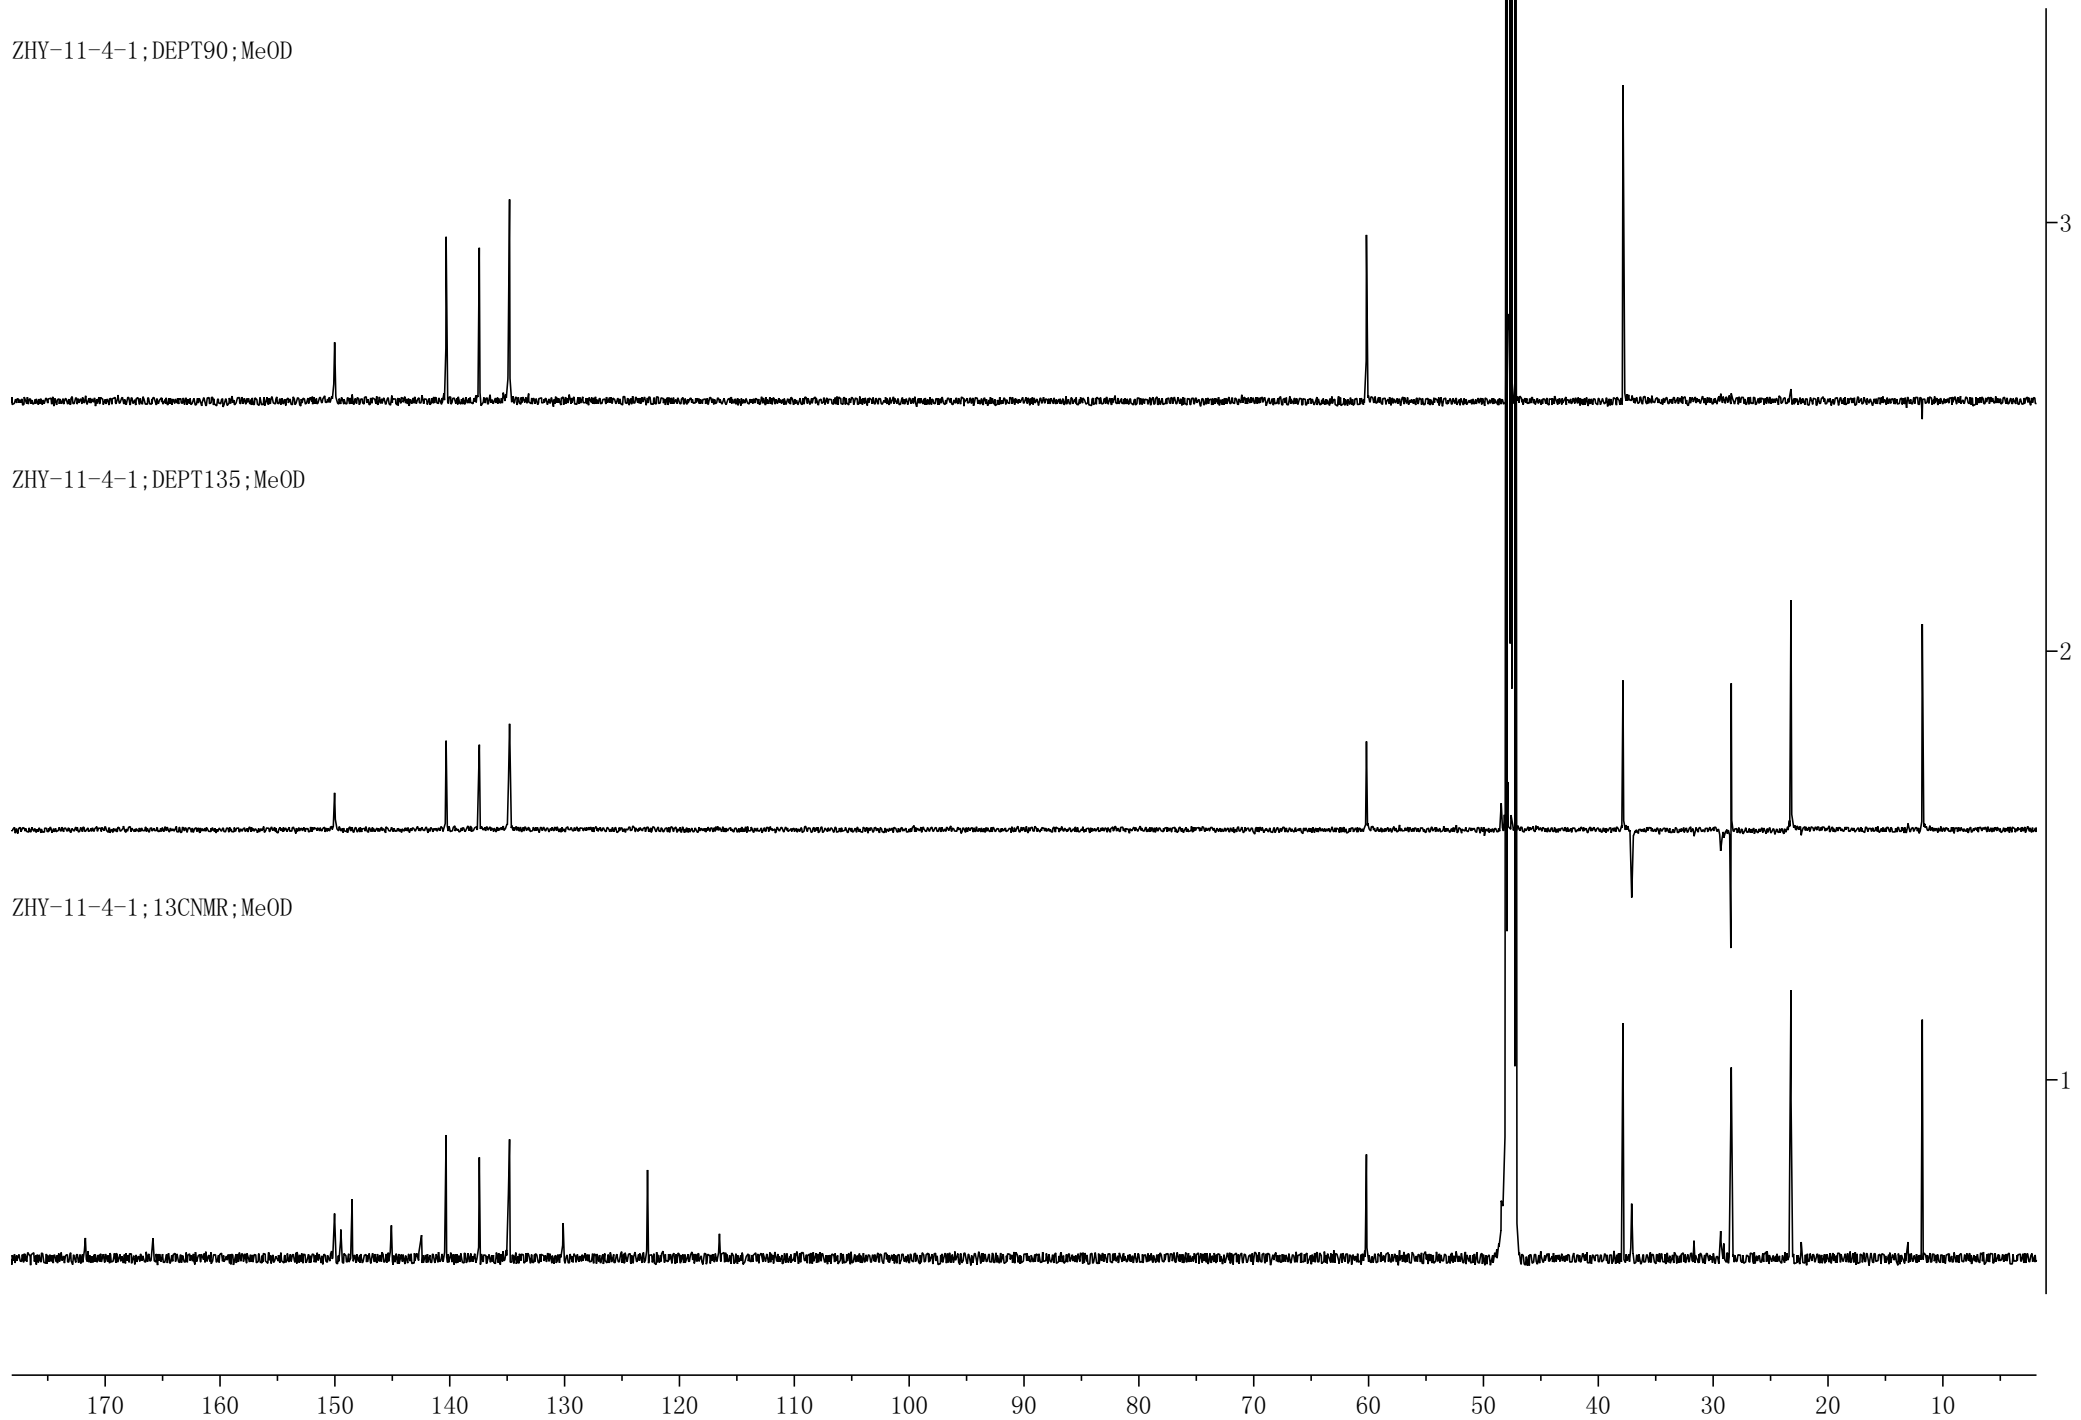

SS17 DEPT spectrum of muriceidine B (2)

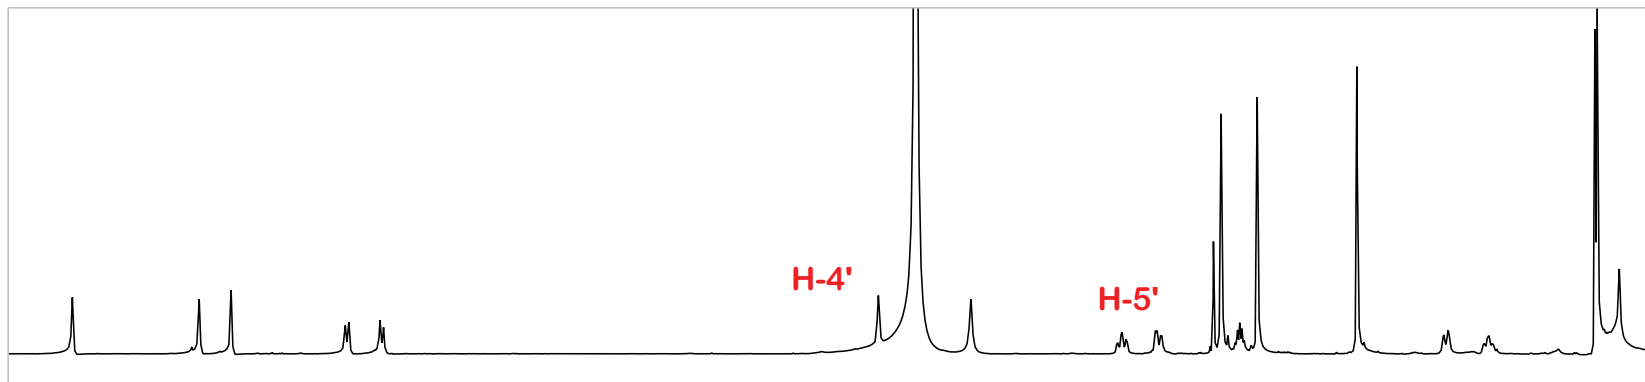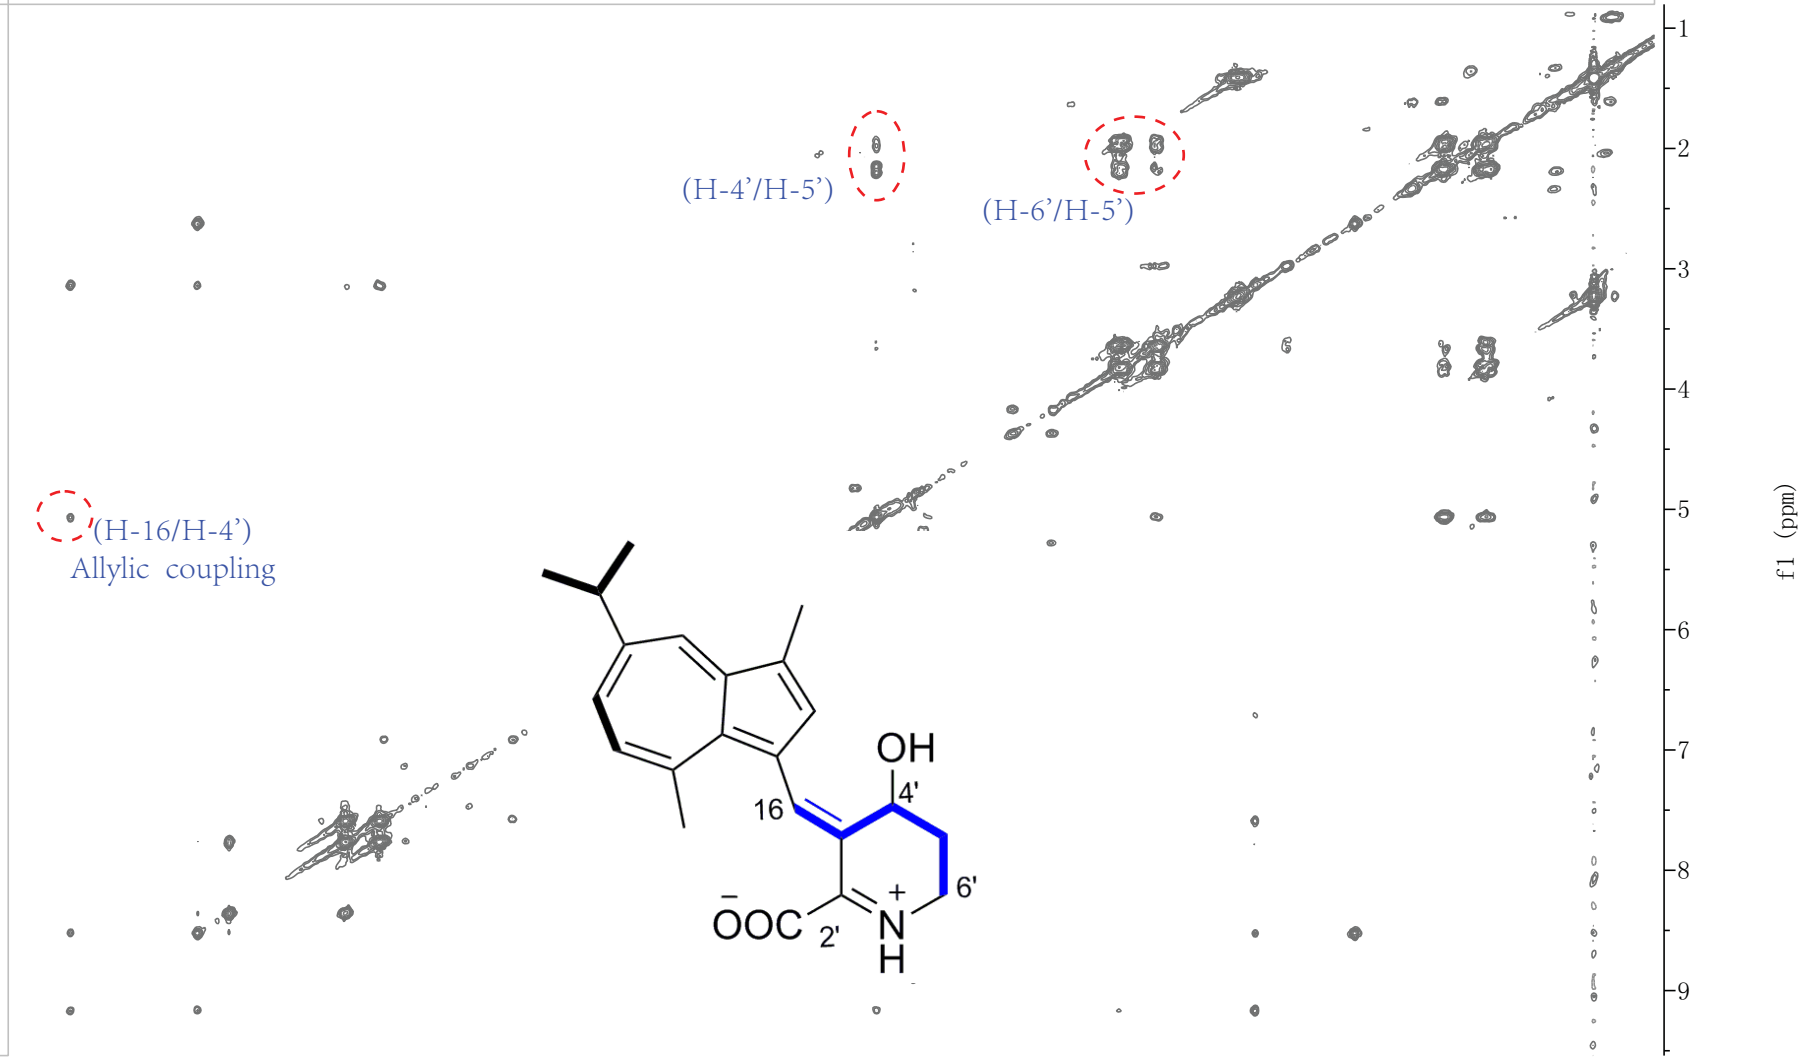

SS18  $^1\text{H}$ - $^1\text{H}$  COSY spectrum of muriceidine B (2)

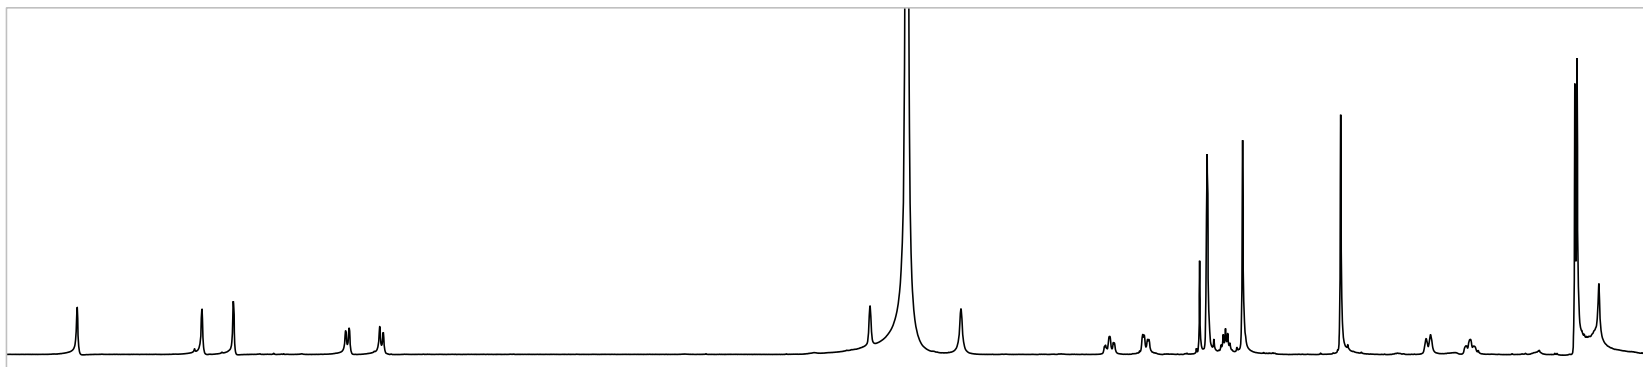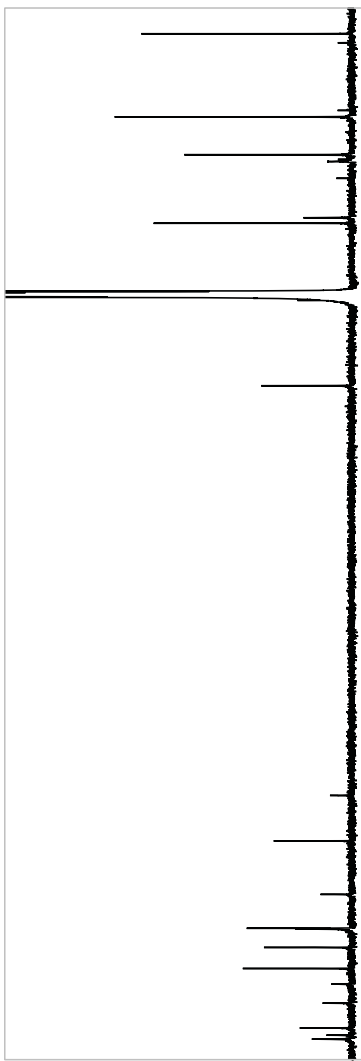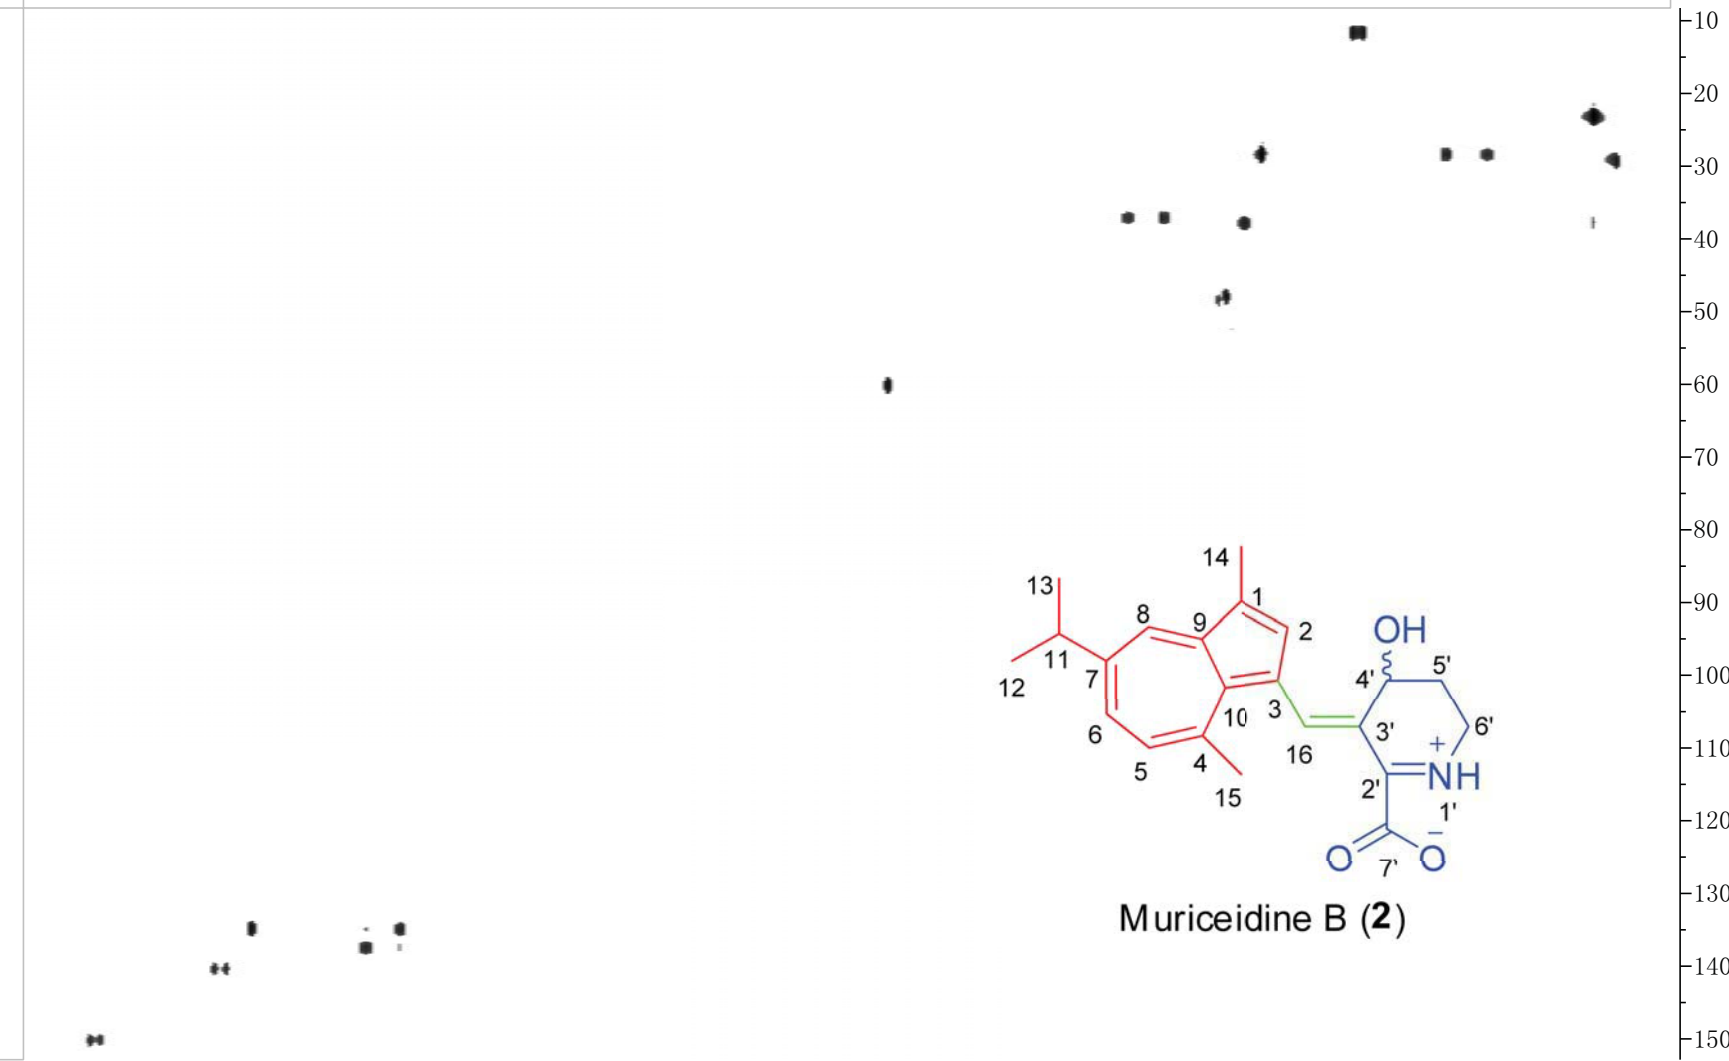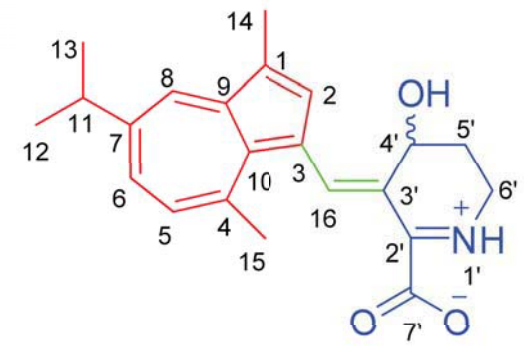

Muriceidine B (2)

SS19 HMQC spectrum of muriceidine B (2)

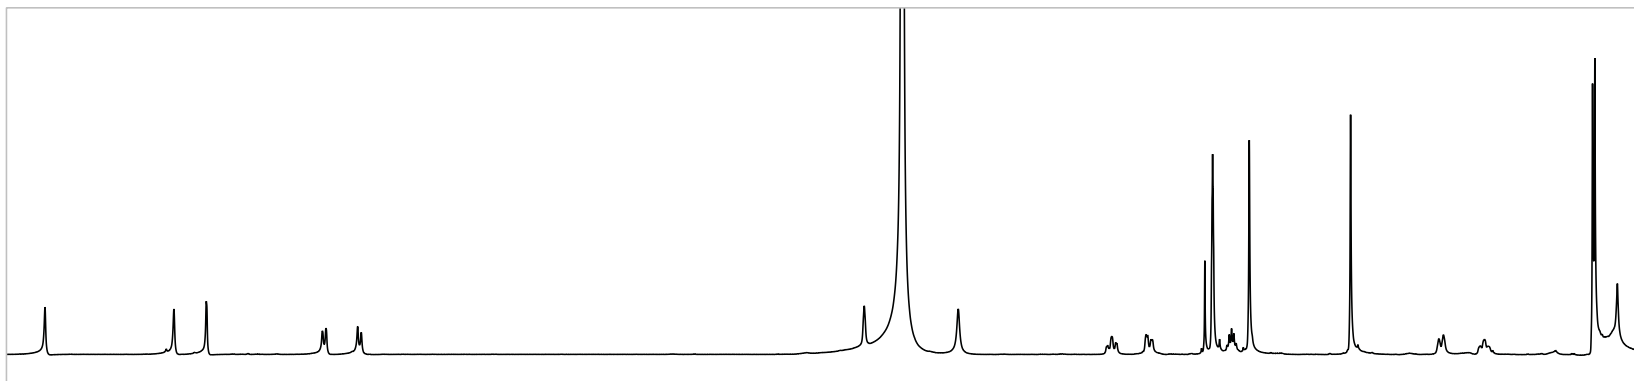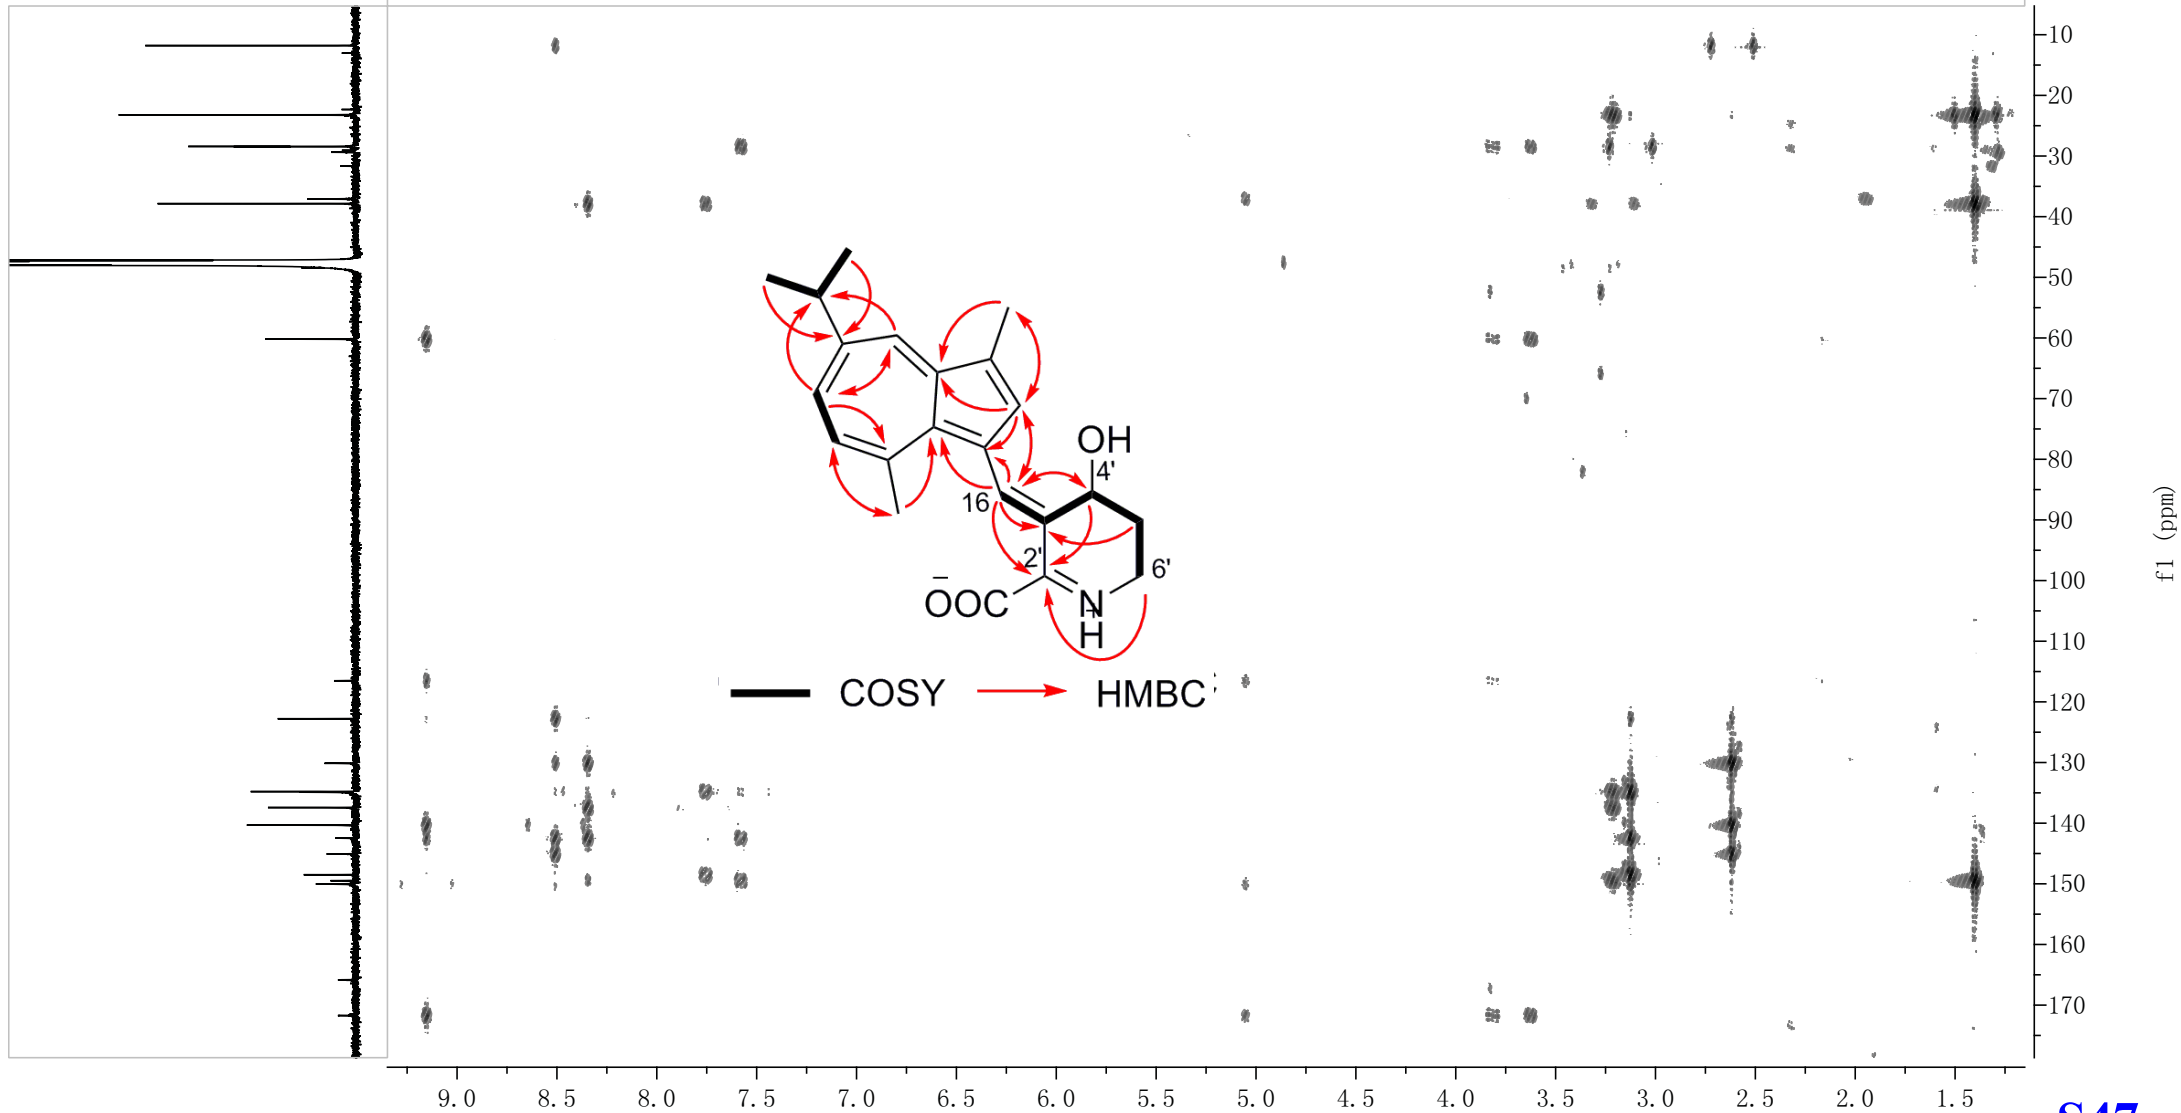

SS20 HMBC spectrum of muriceidine B (2)

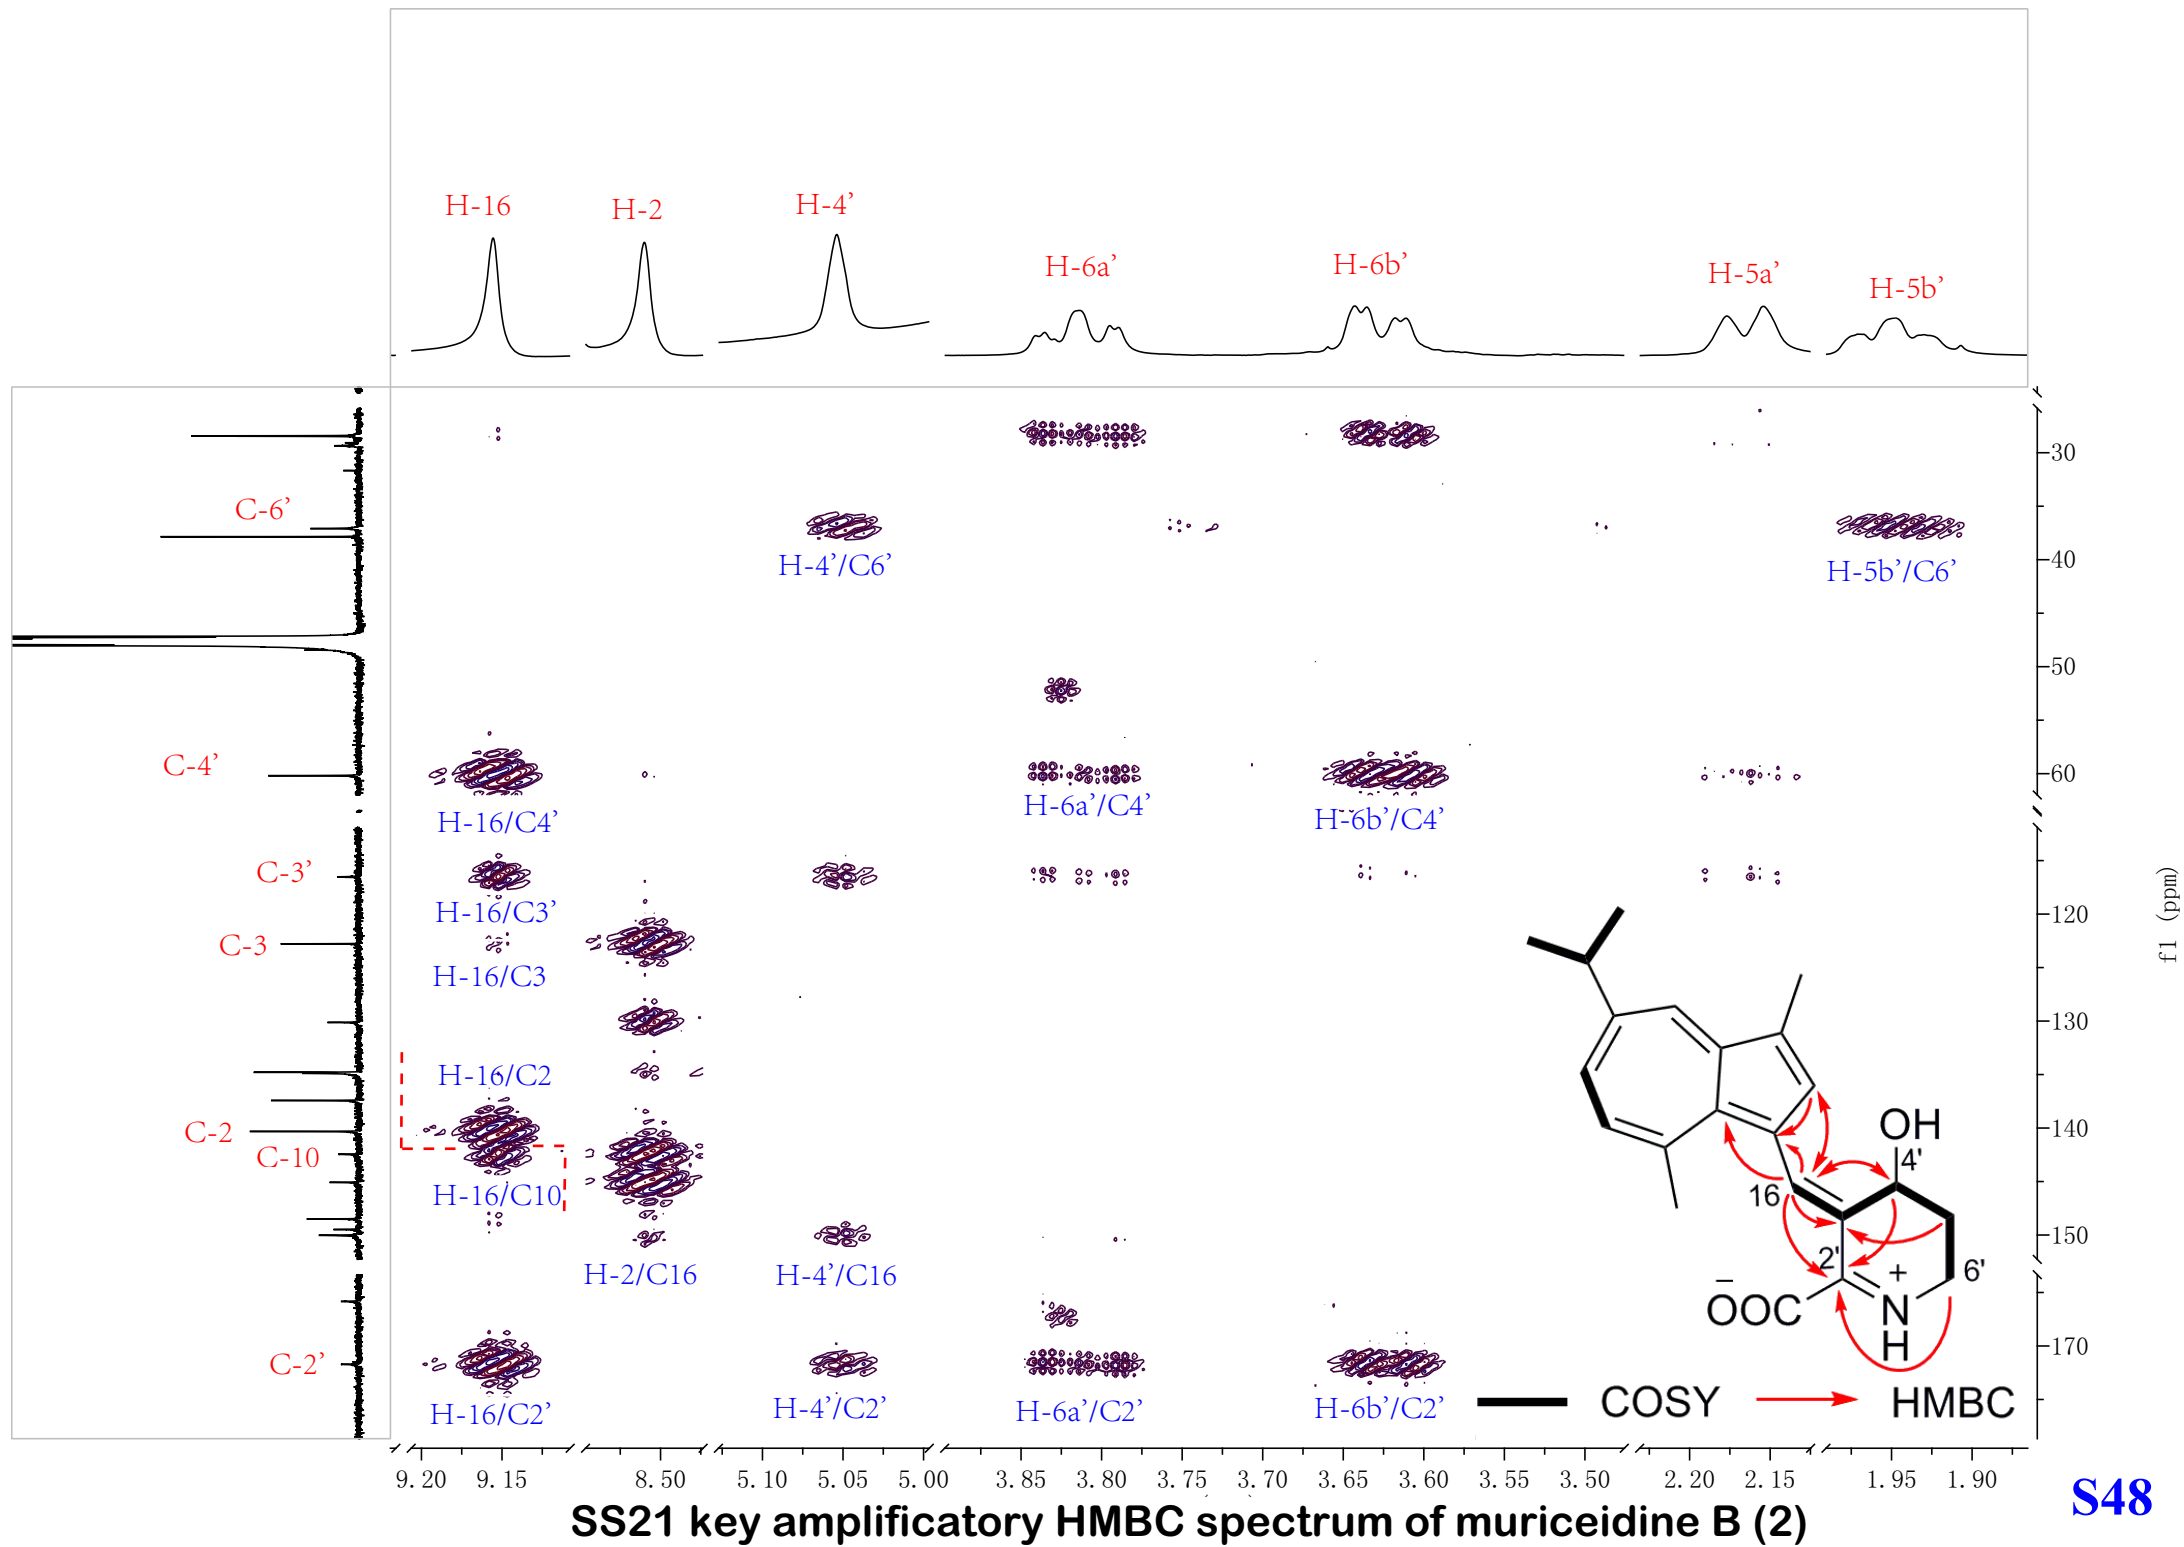



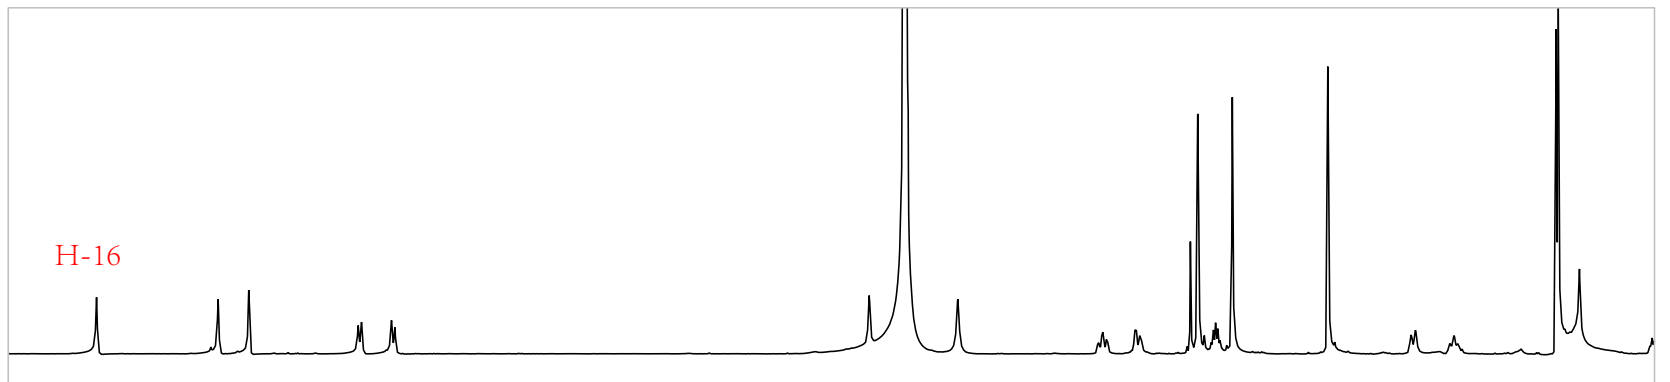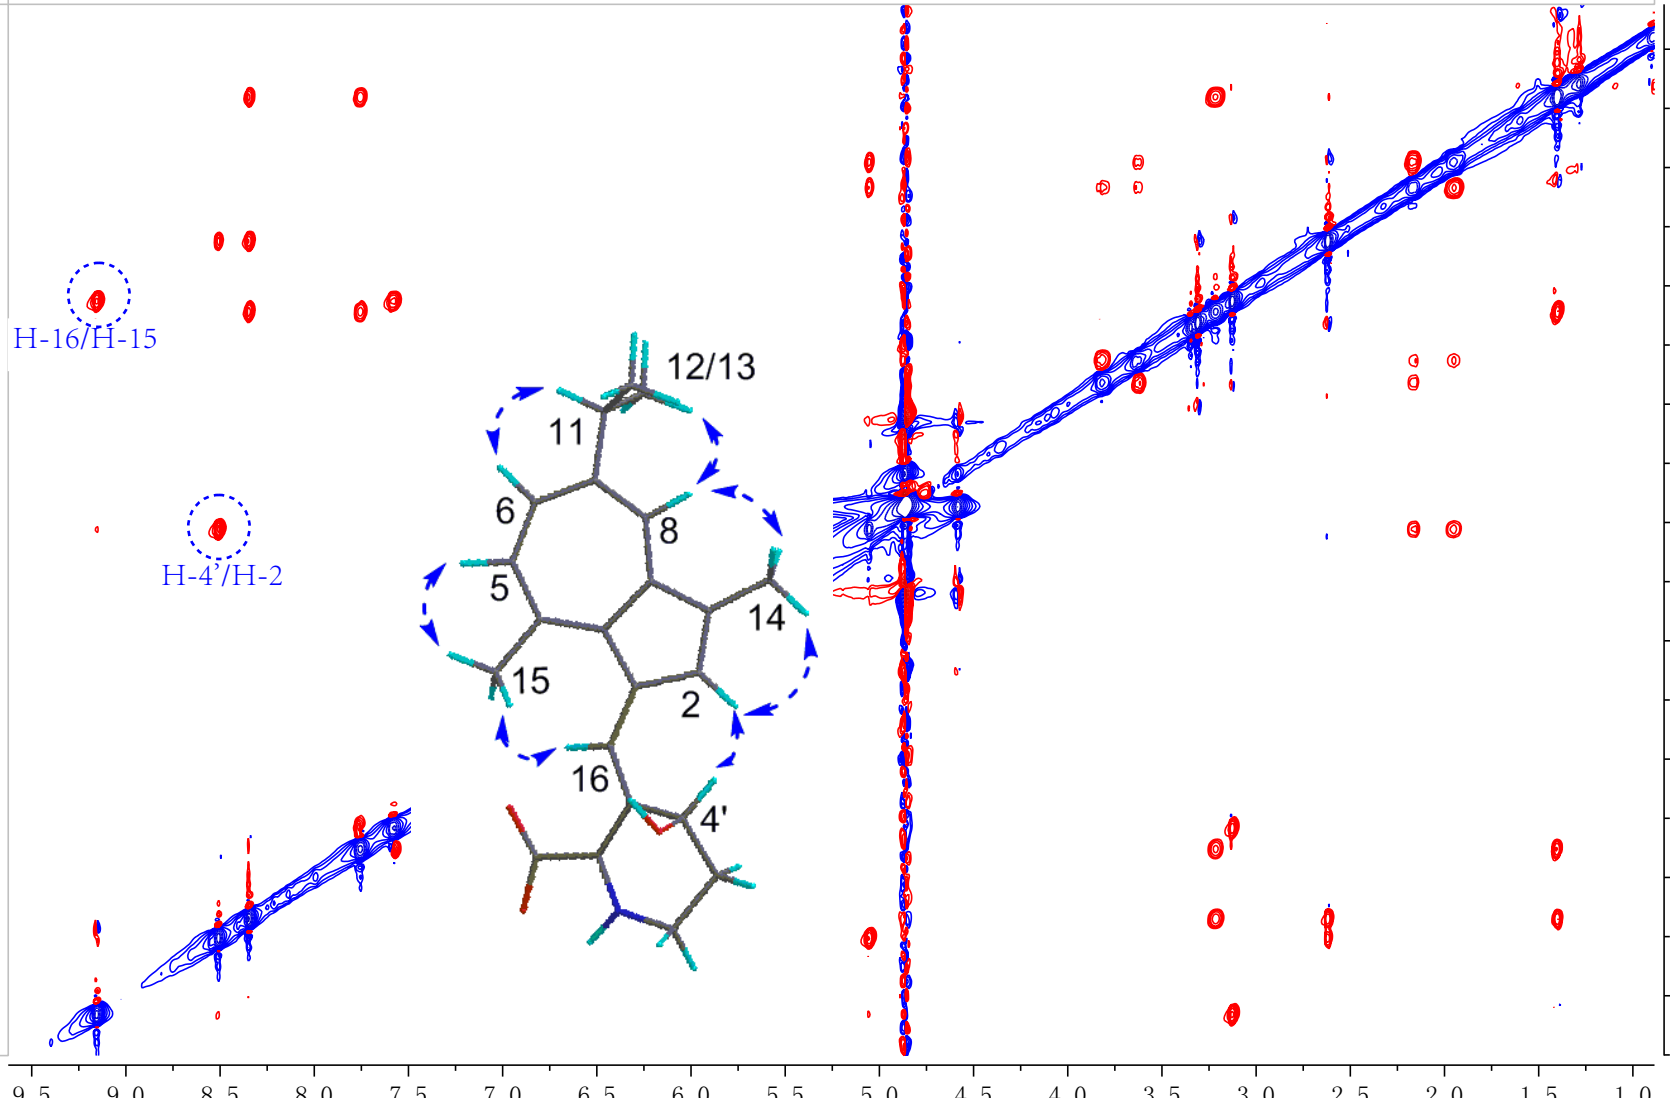

H-4'

H-16/H-15

H-4'/H-2

f1 (ppm)

SS22 NOESY spectrum of muriceidine B (2)

ZHY-11-2-2

20120705-ZHY-11-2-2 117 (2.215) Sm (Mn, 2x3.00)

TOF MS ES+  
1.30e3

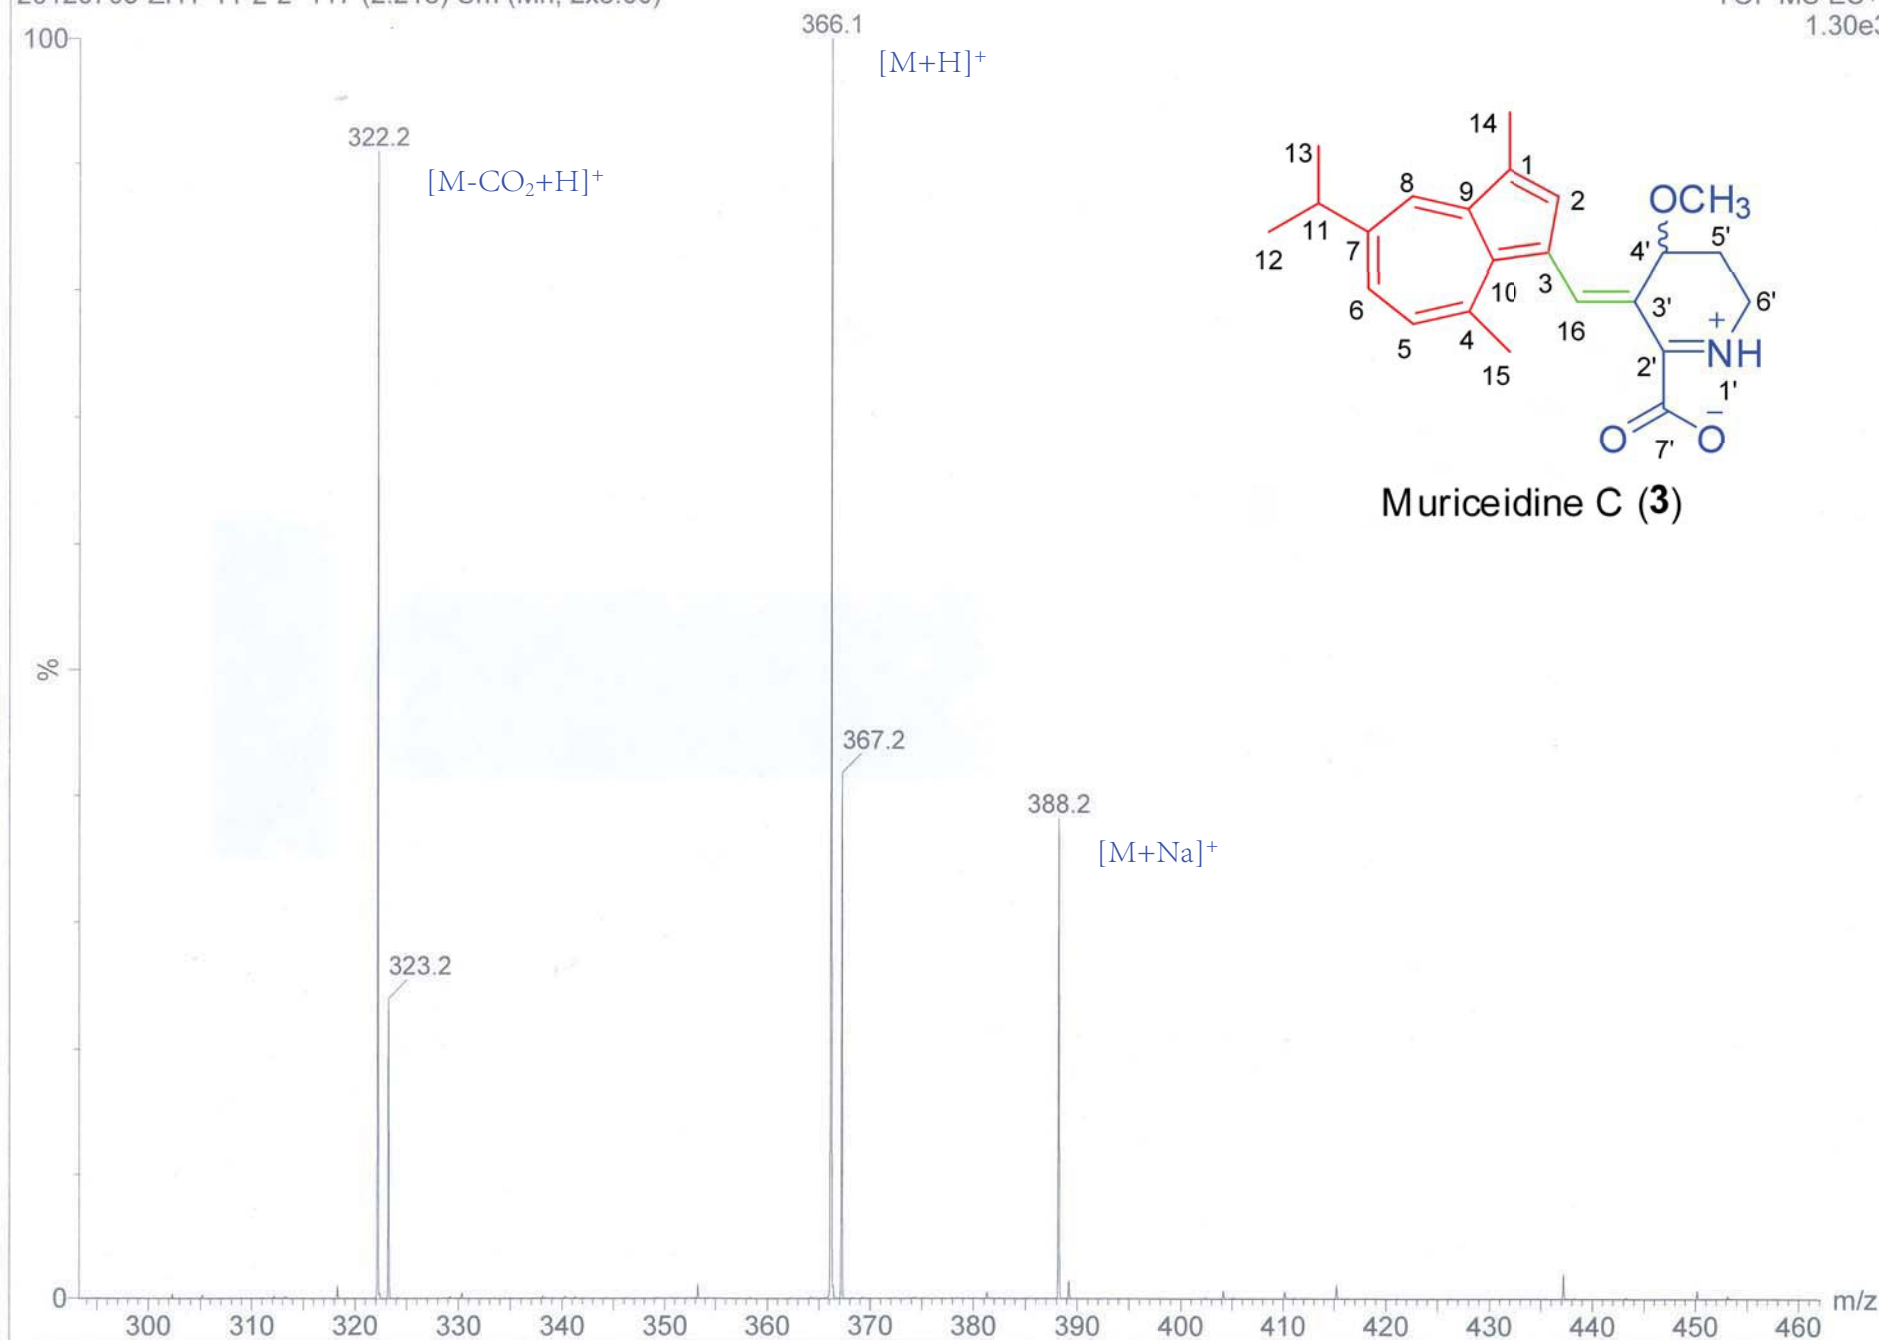

SS23 The positive ESIMS spectrum of muriceidine C (3)

20120706-ZHY-11-2-2\_120706105310 #27 RT: 0.25 AV: 1 NL: 6.23E6  
T: FTMS + c ESI Full ms [60.00-1500.00]

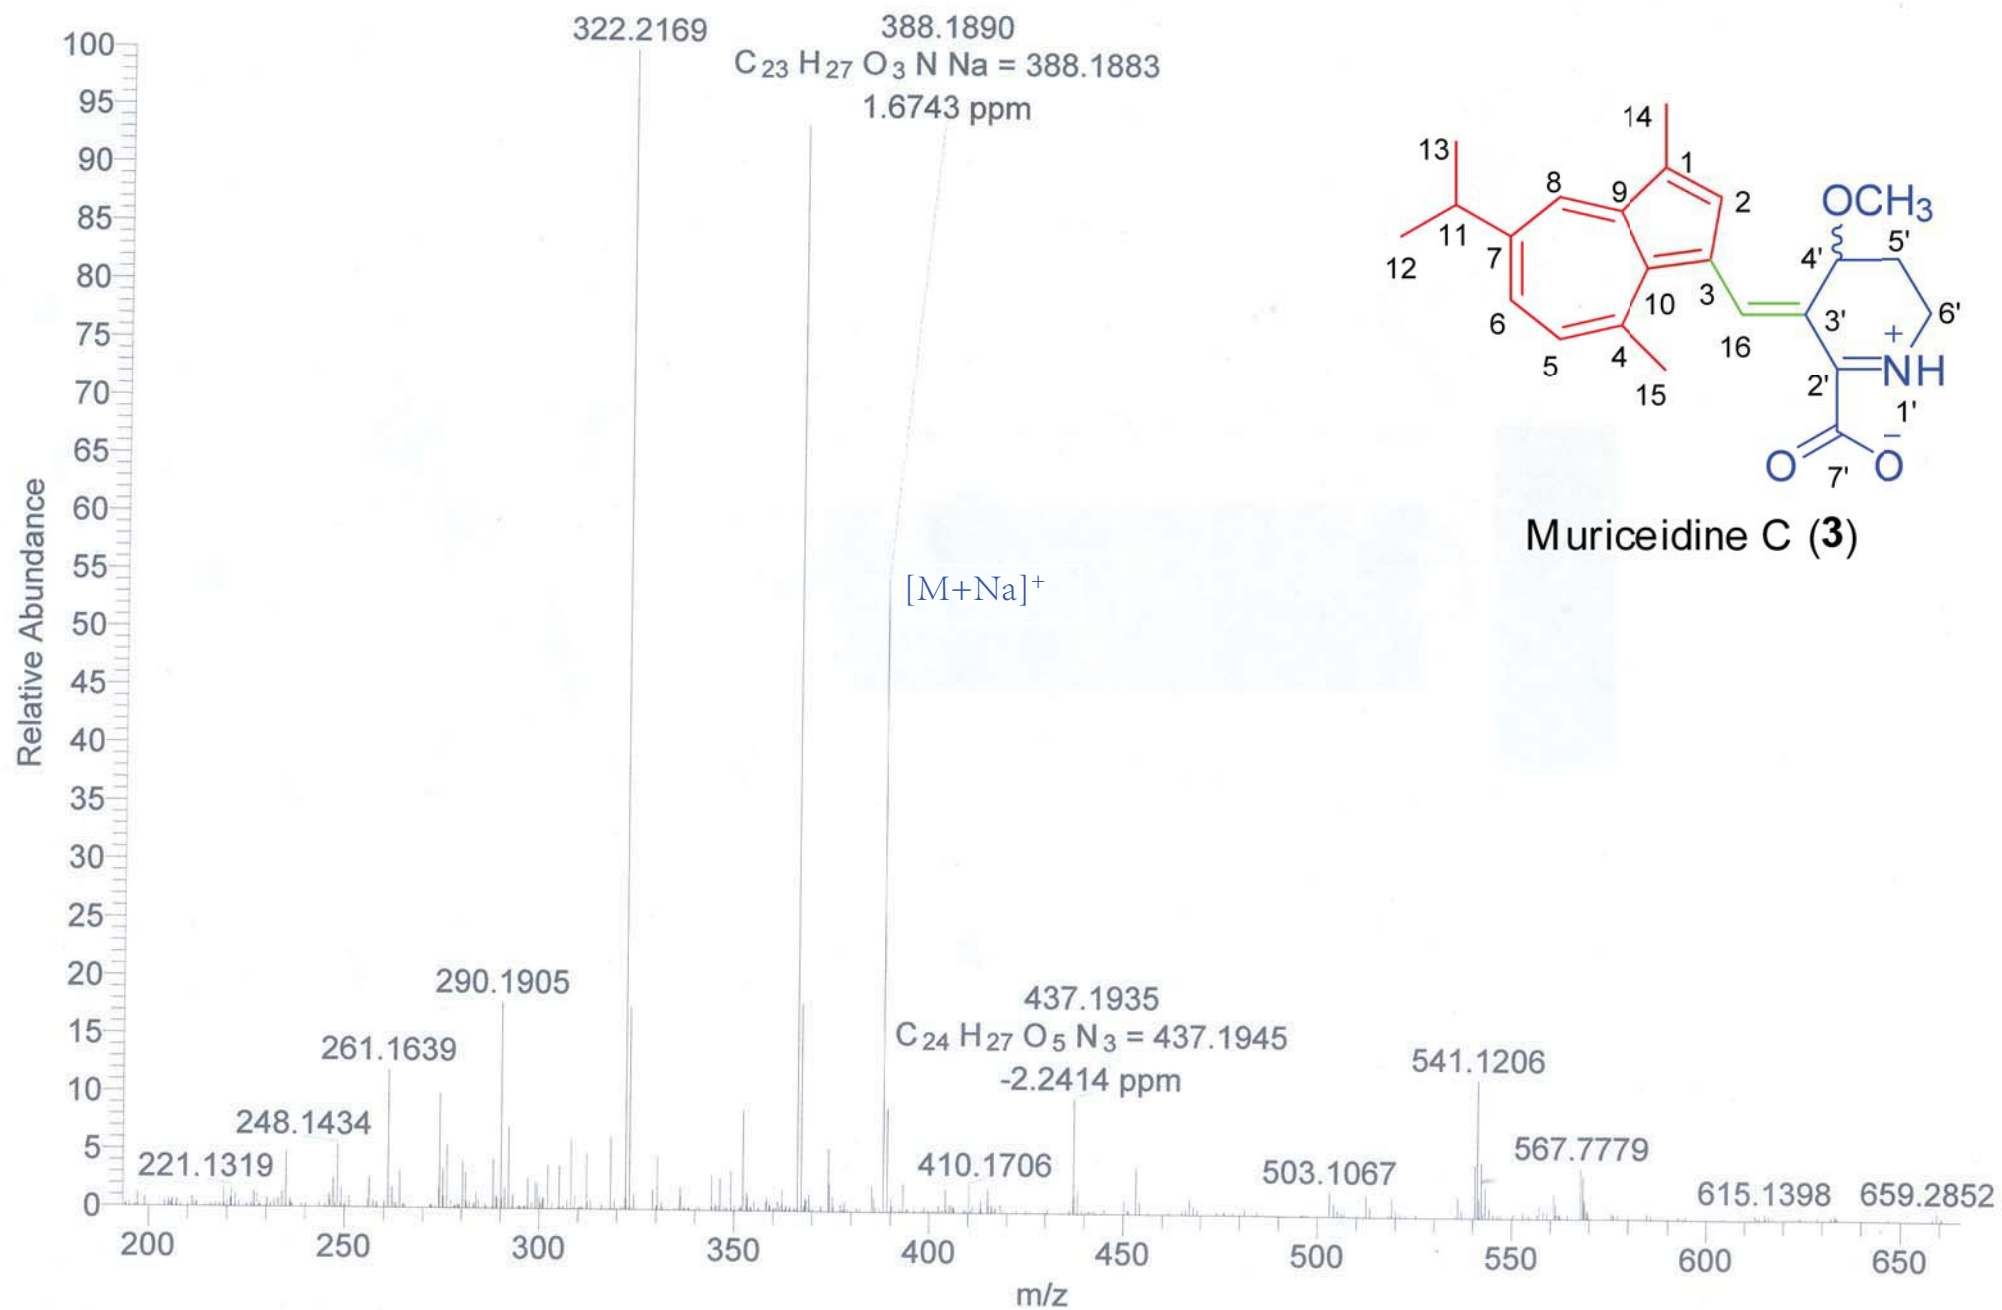

SS24 The positive HRESIMS spectrum of muriceidine C (3)

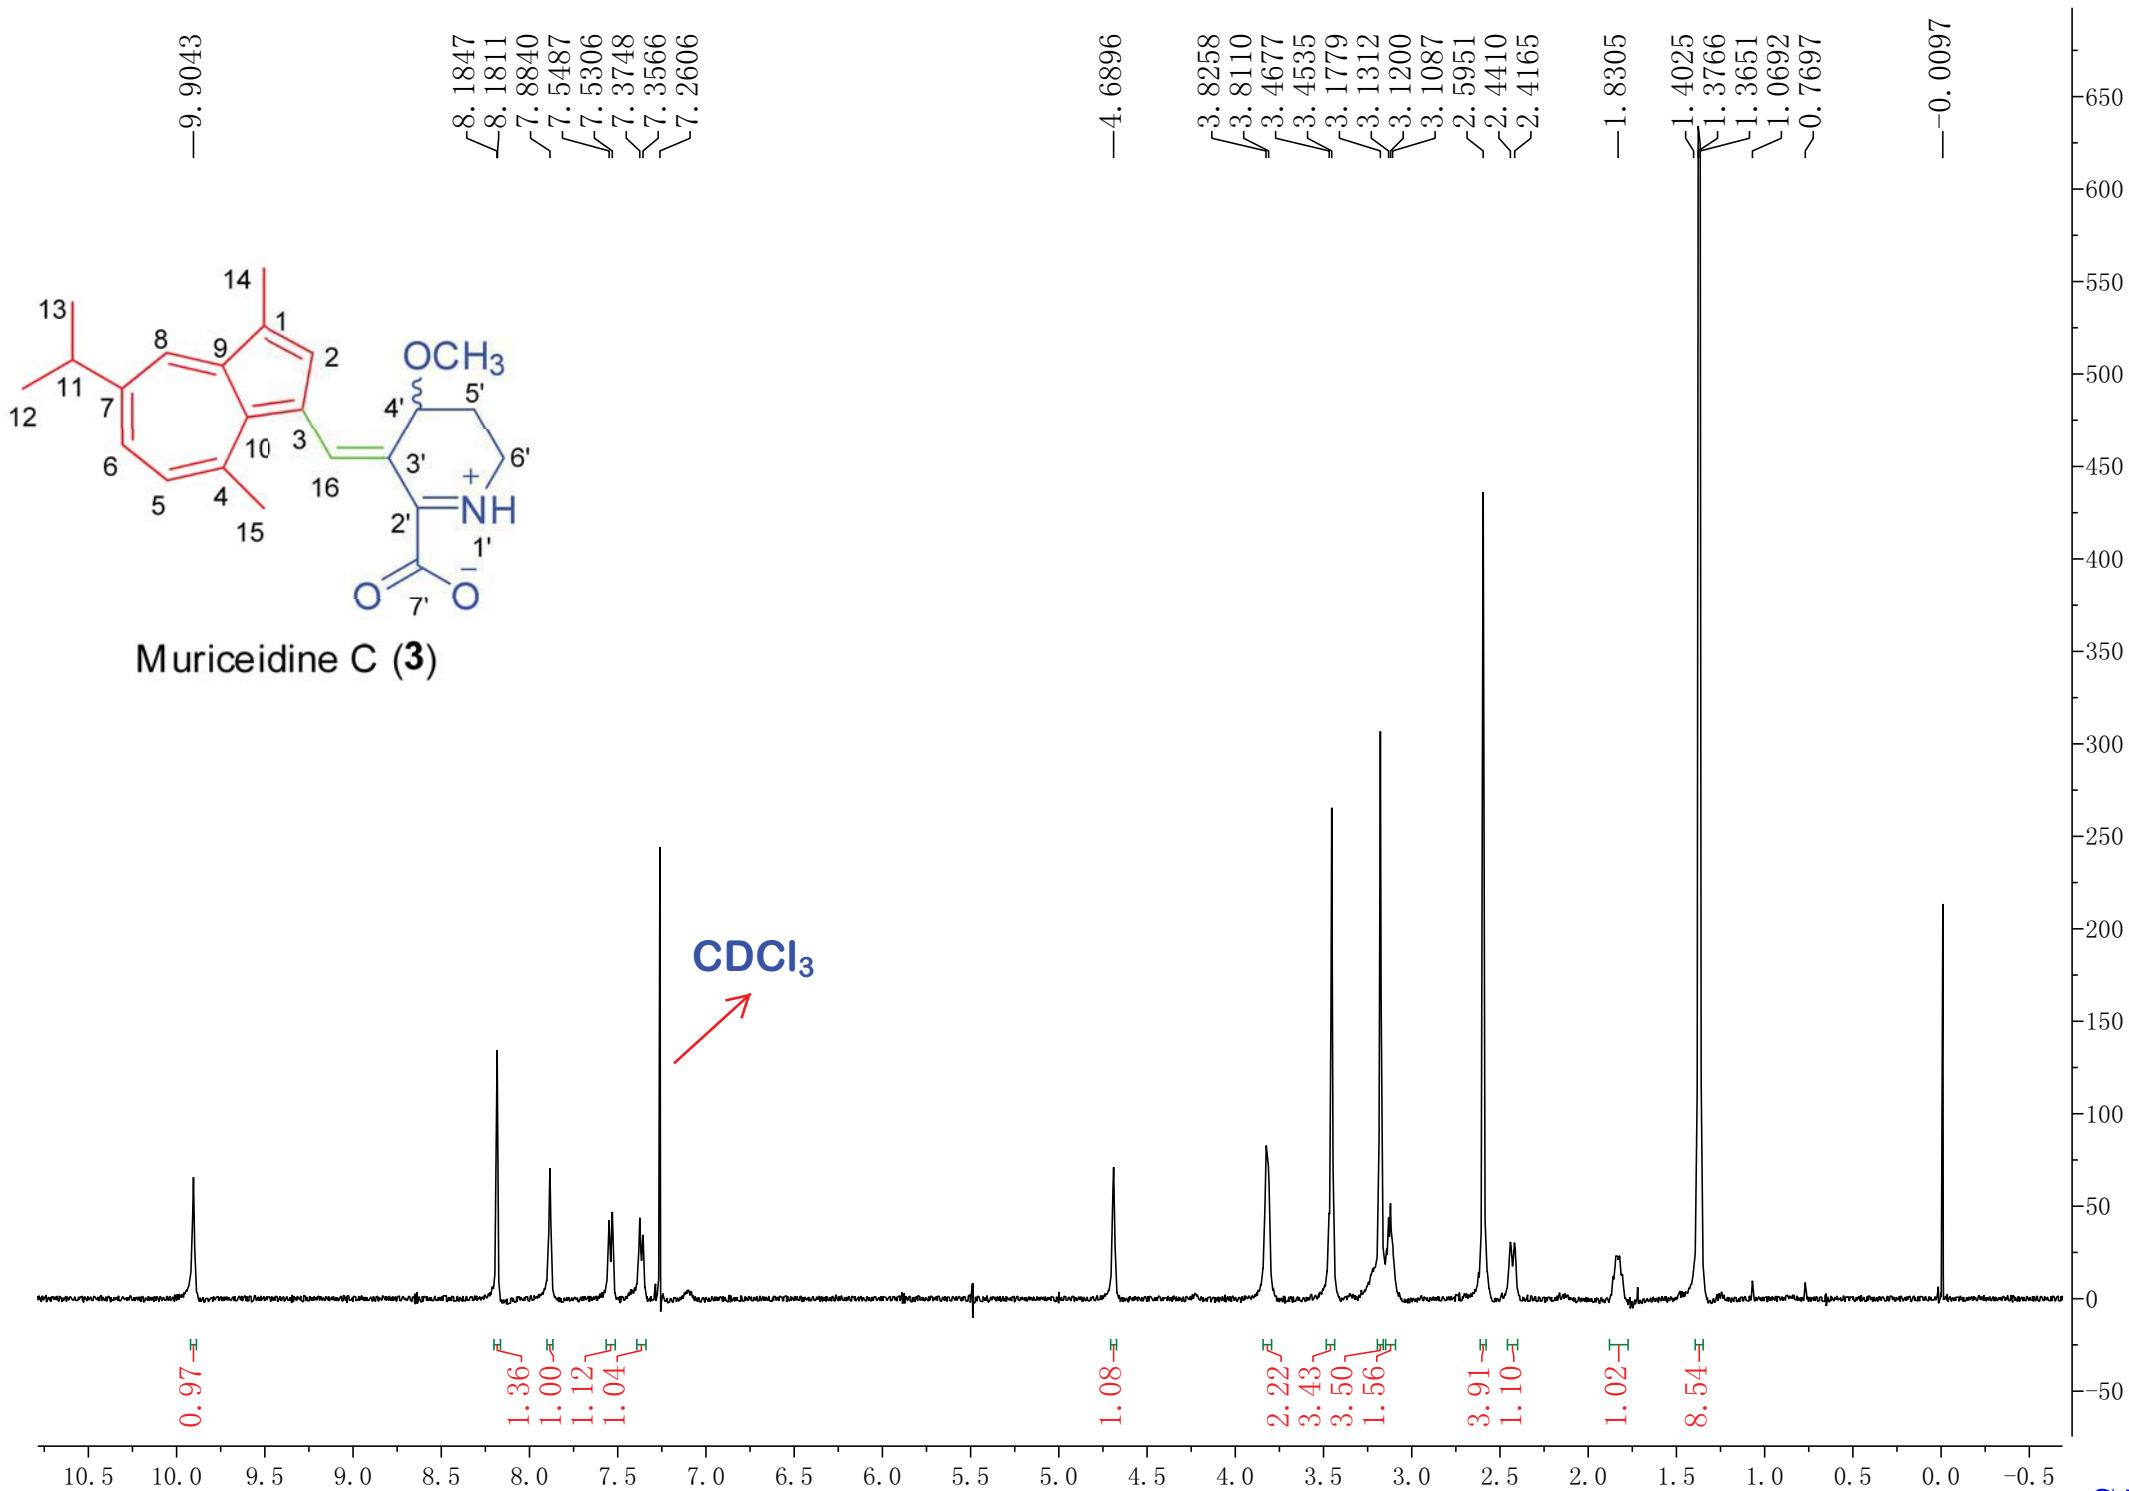

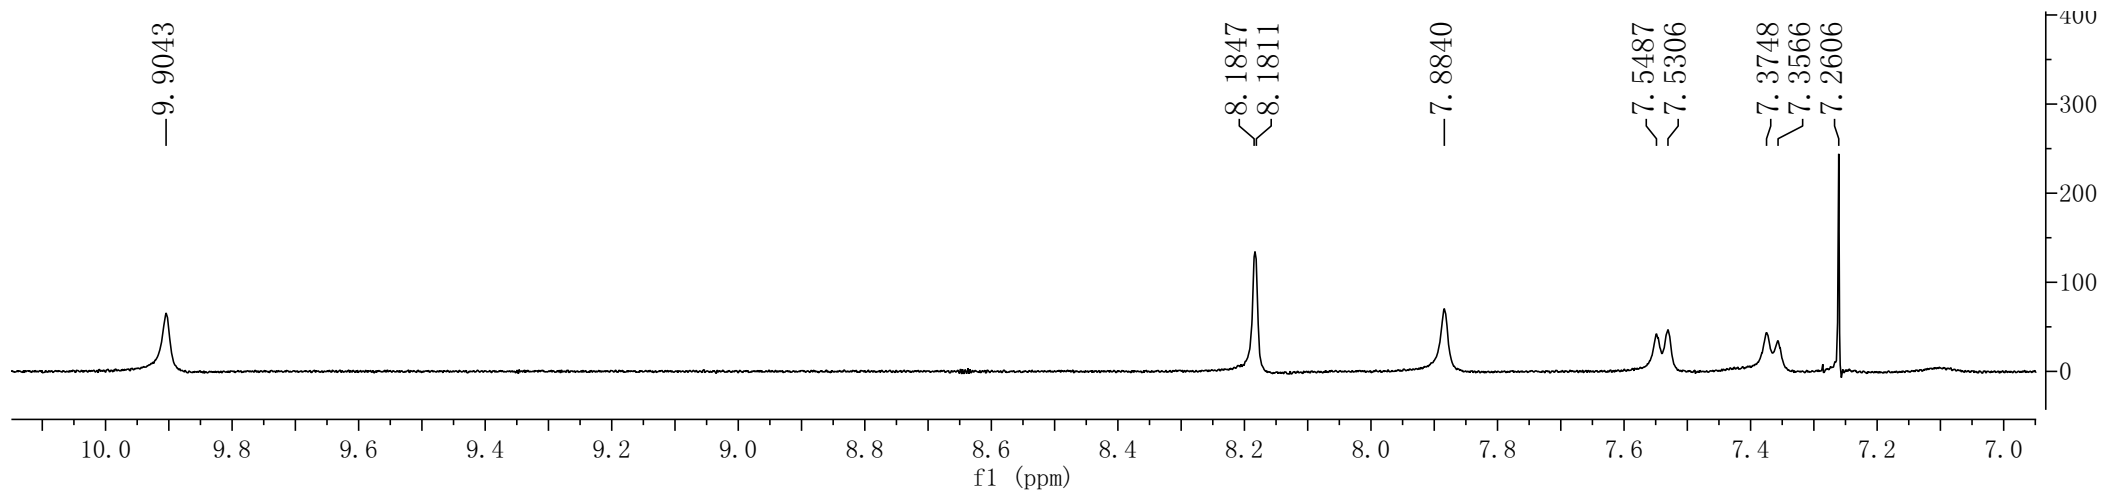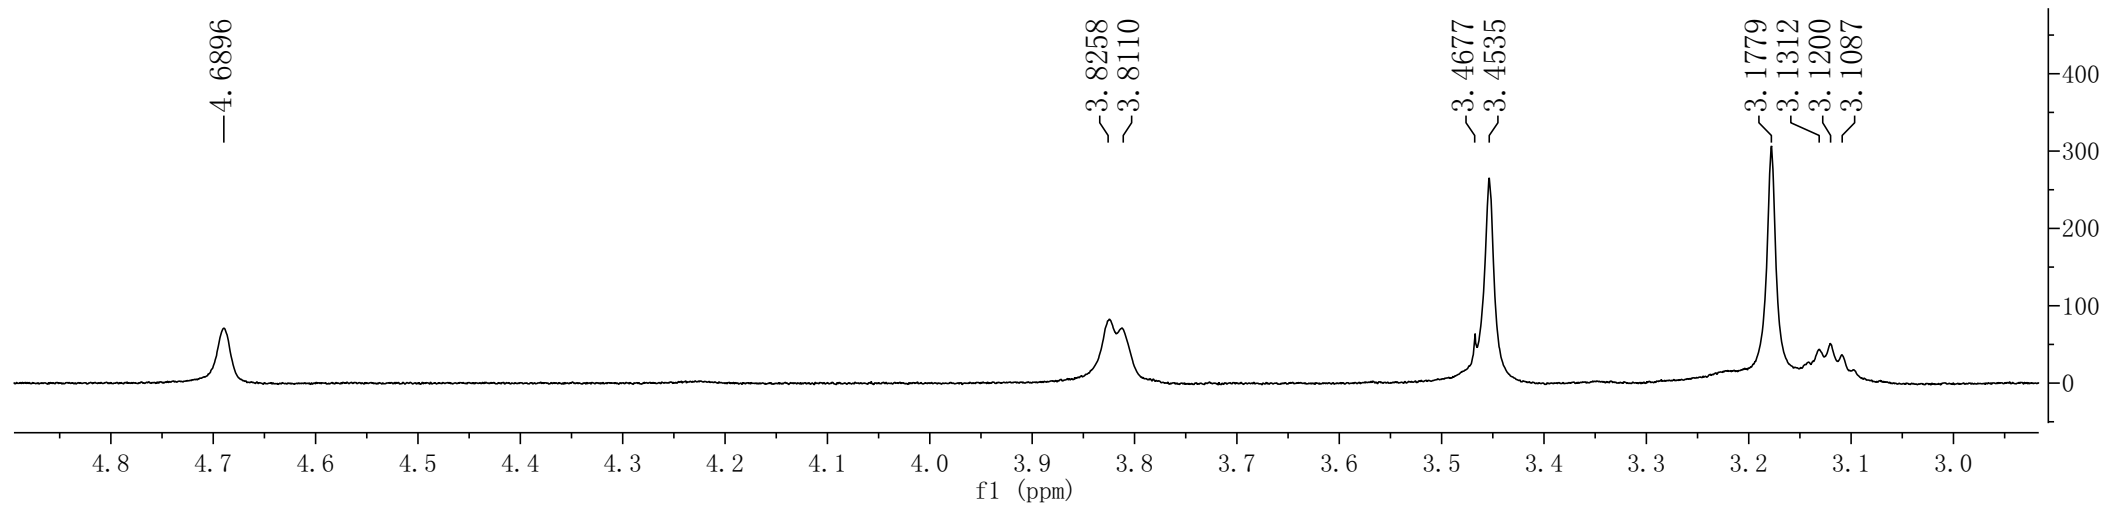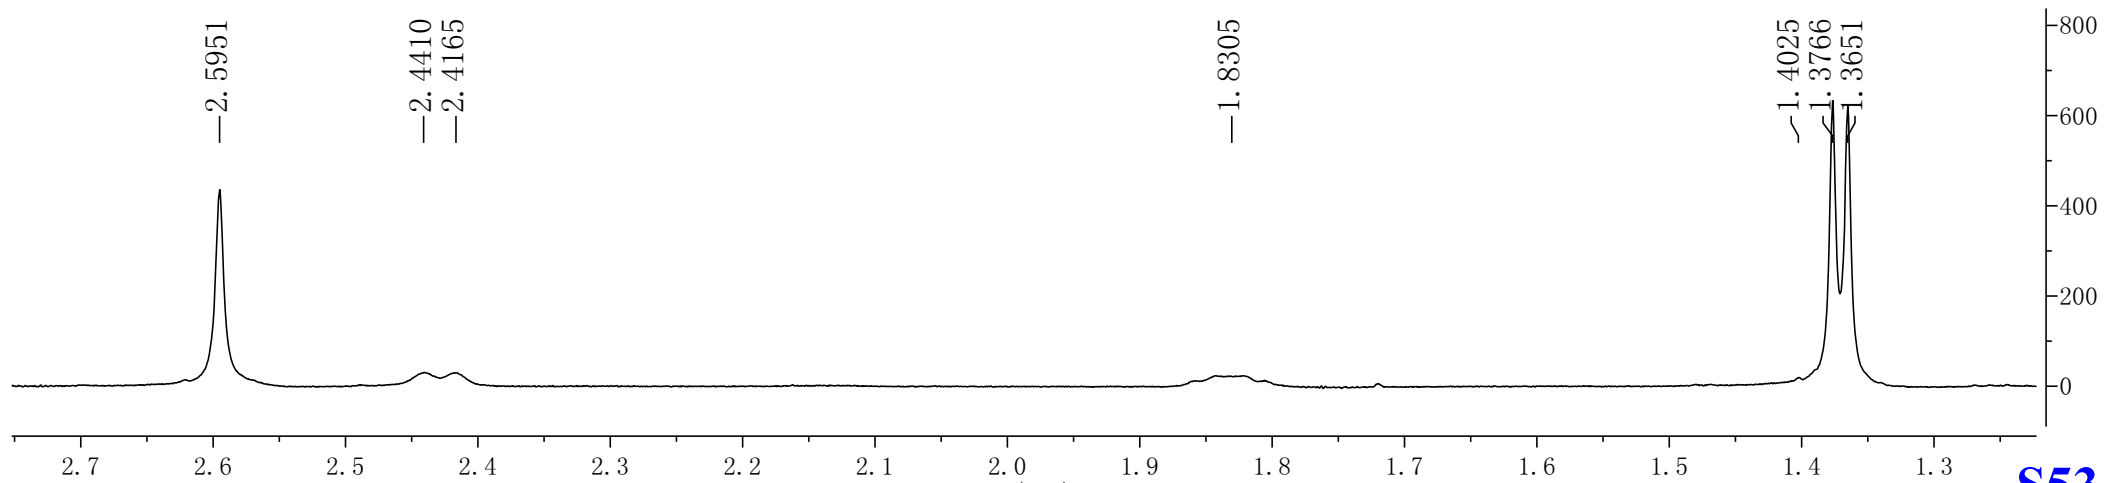

SS26 The amplificatory  $^1\text{H}$  NMR spectrum of muriceidine C (3)

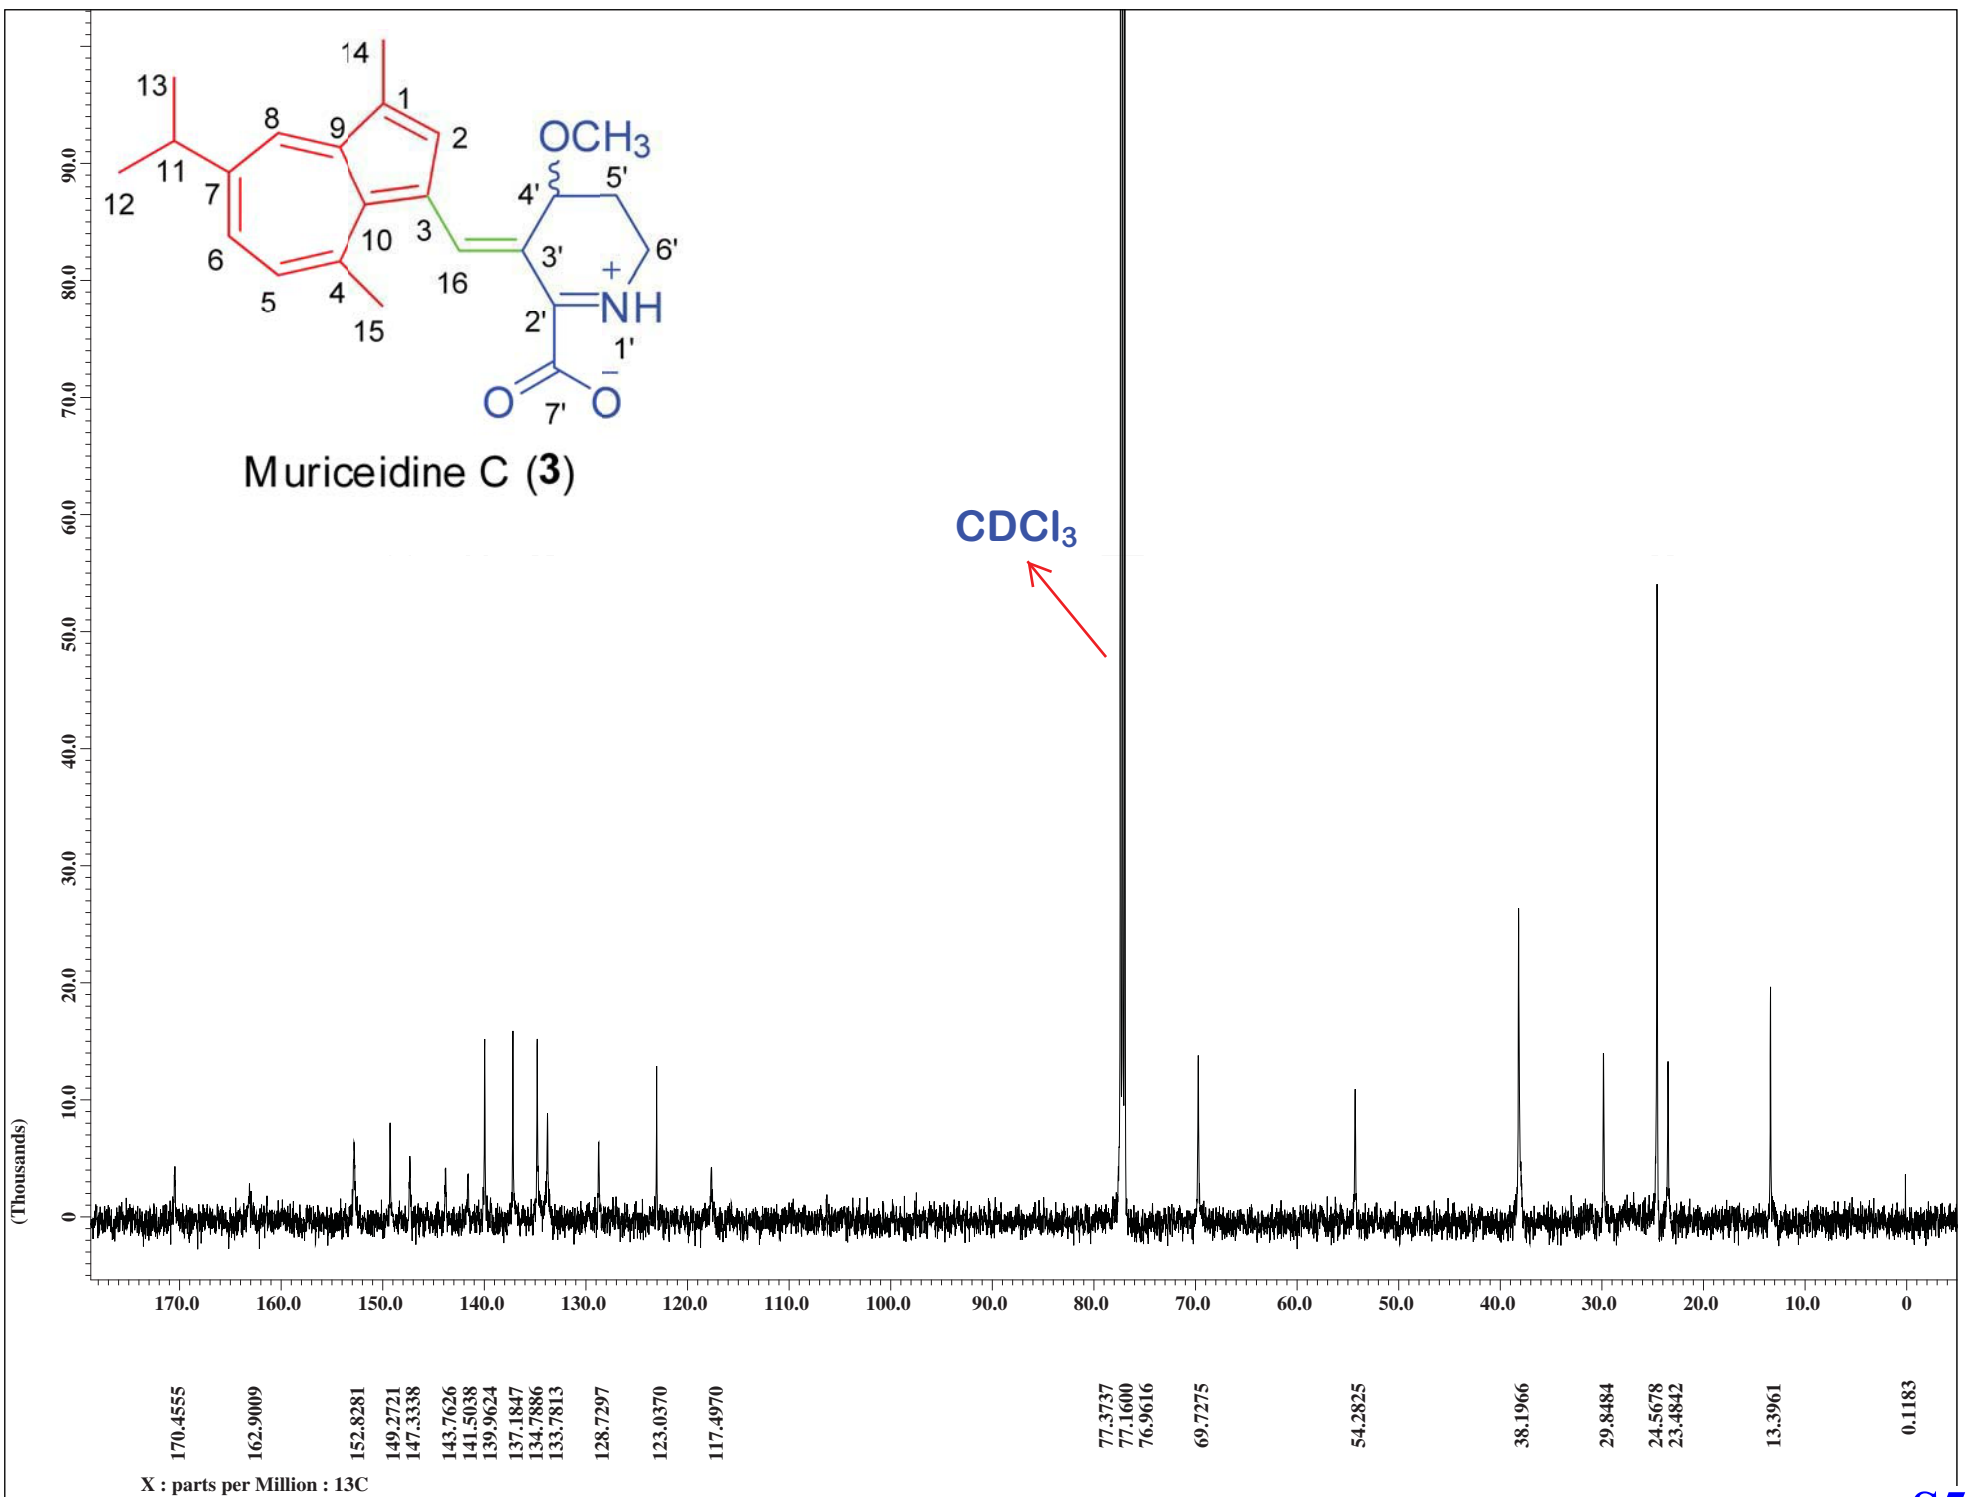

SS27 <sup>13</sup>C NMR (150 MHz, CDCl<sub>3</sub>) spectrum of muriceidine C (3)

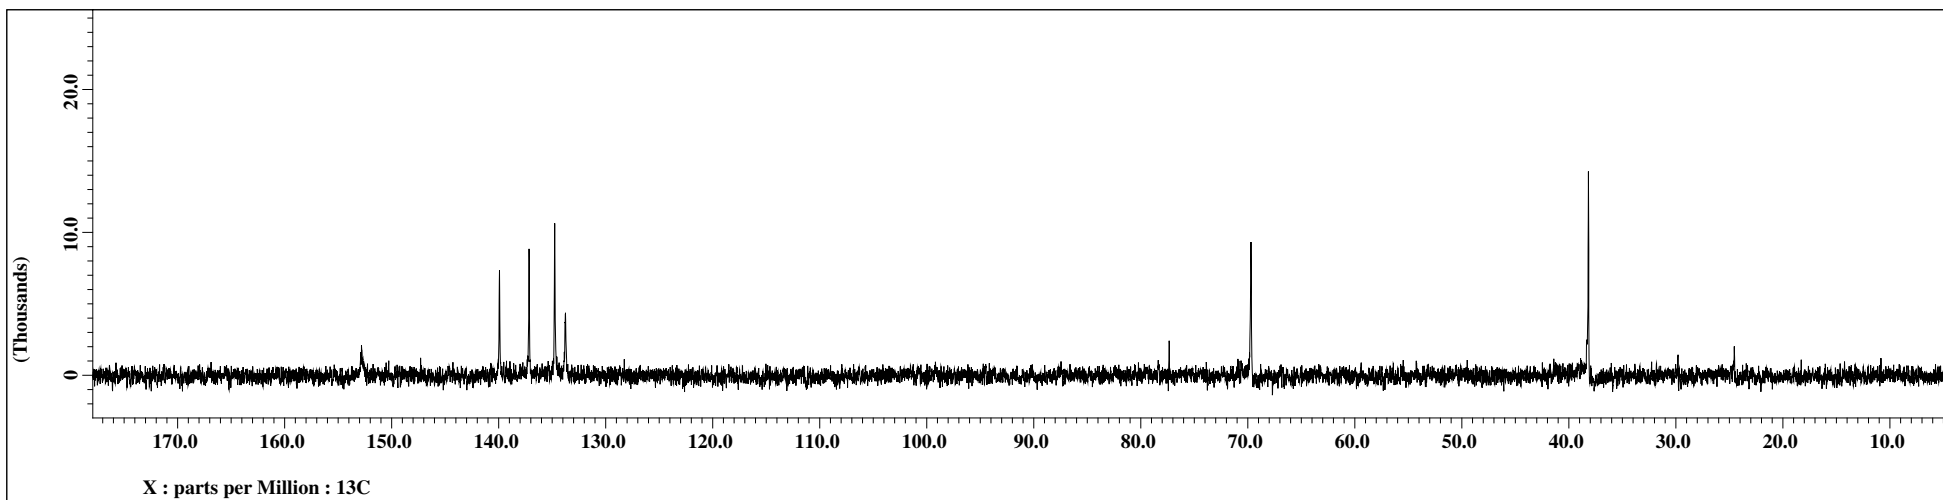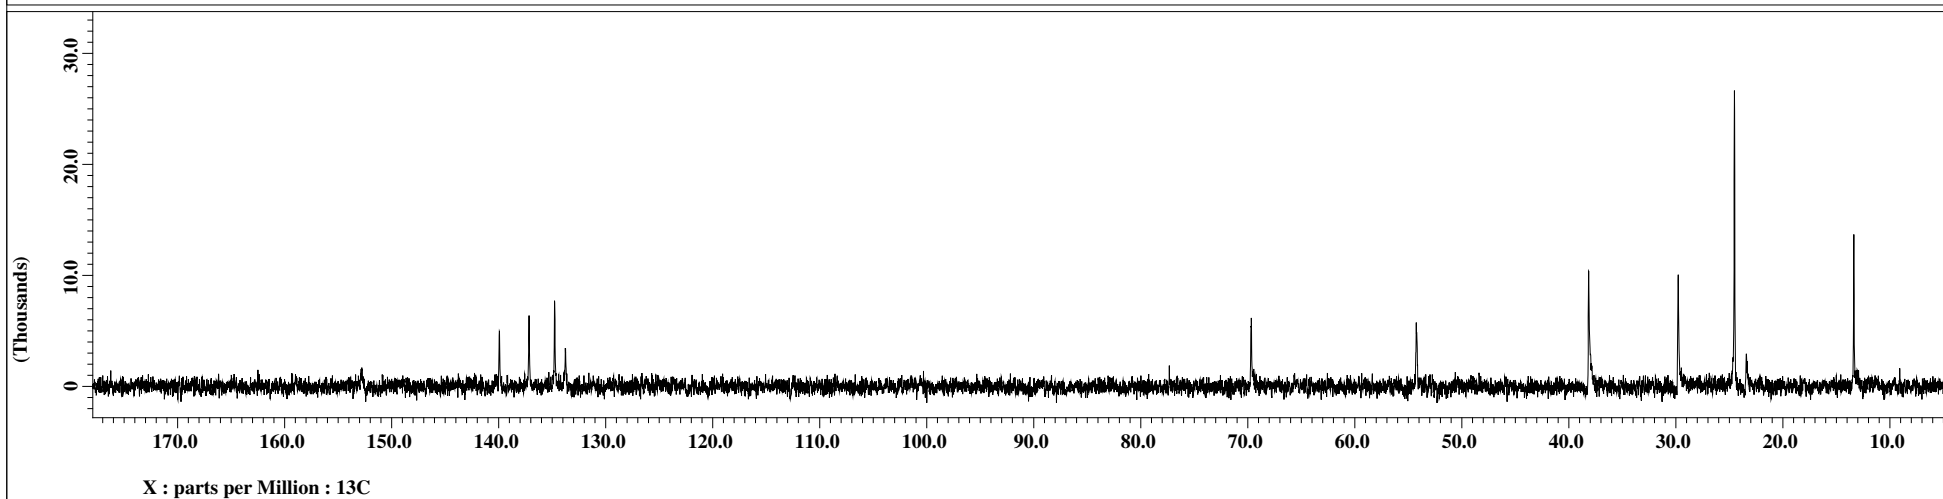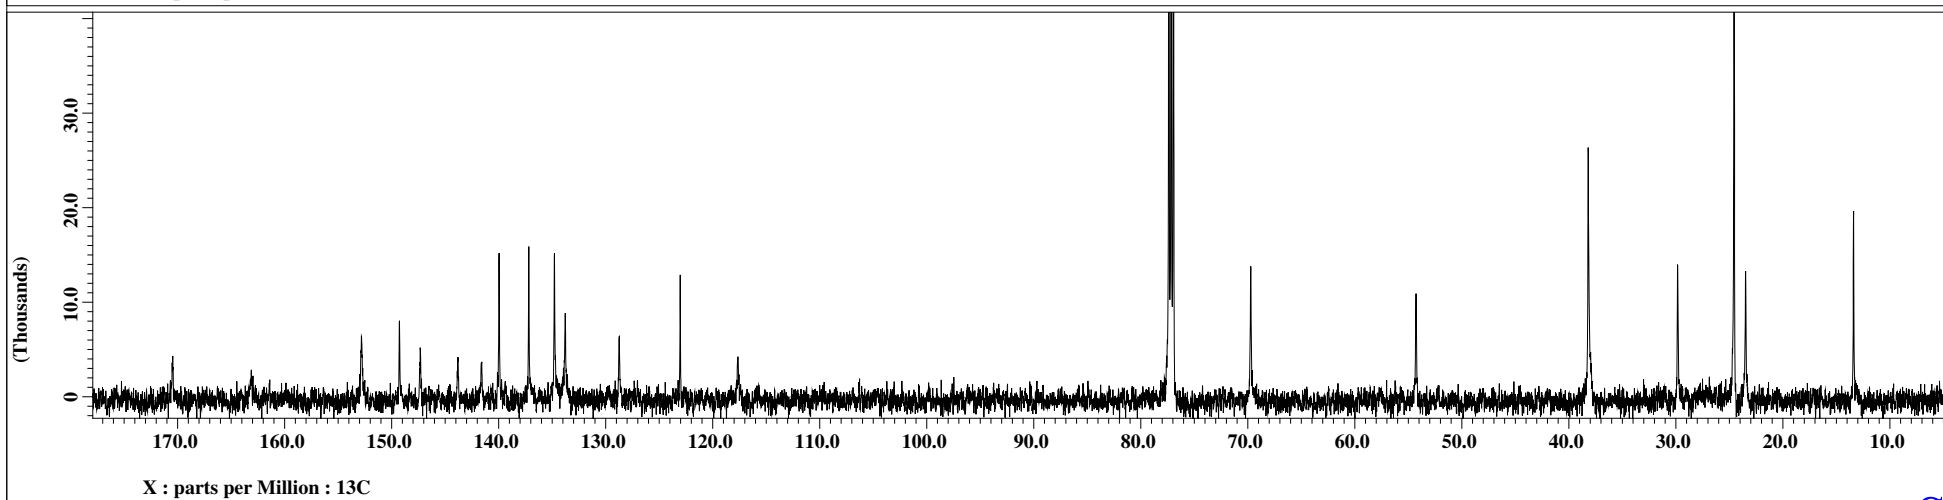

SS28 DEPT spectrum of muriceidine C (3)

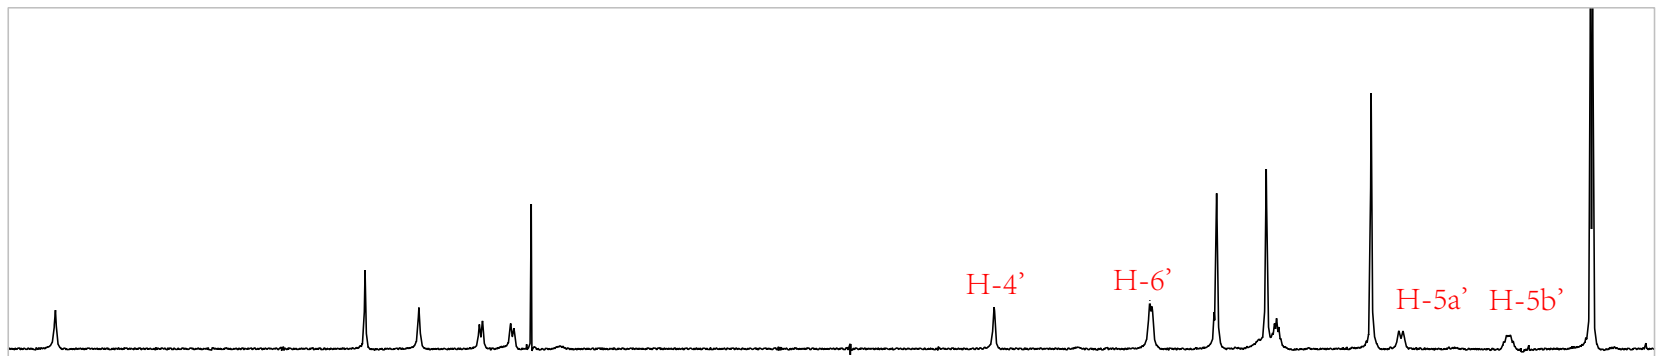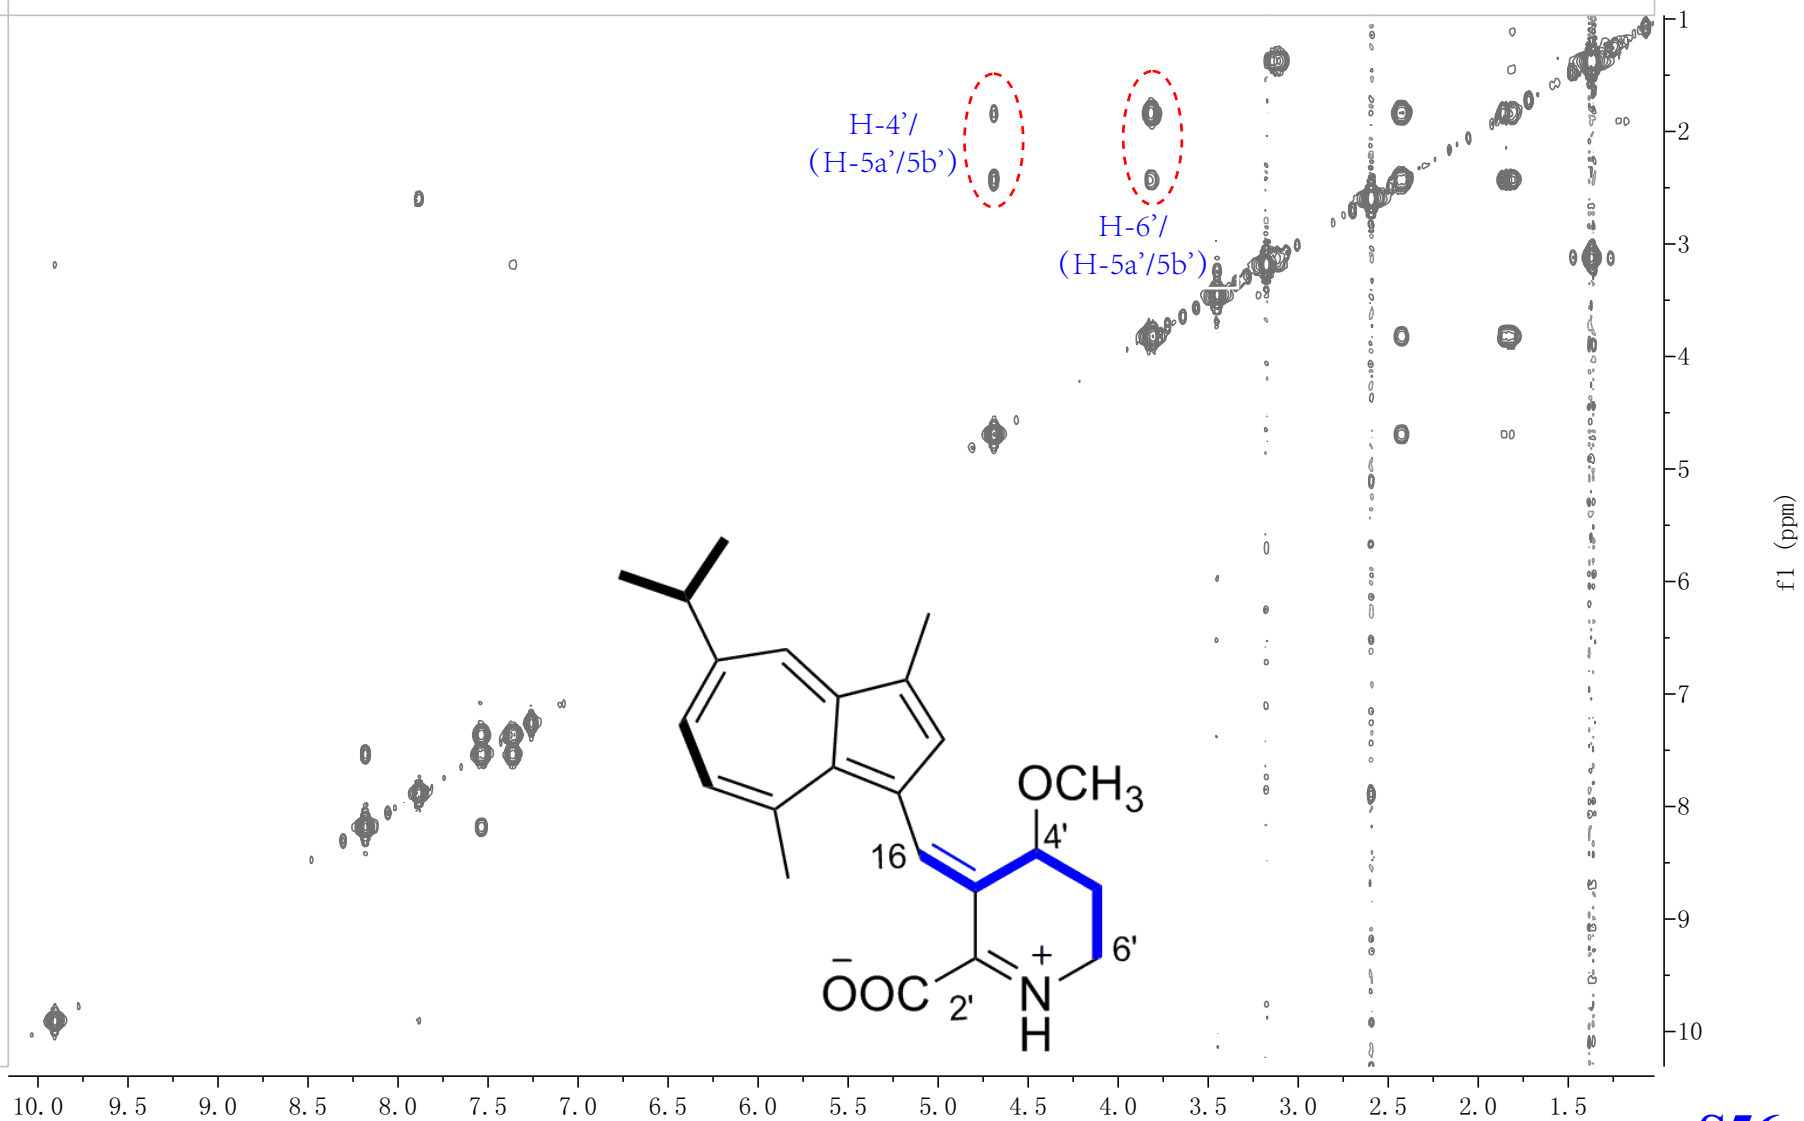

SS29  $^1\text{H}$ - $^1\text{H}$  COSY spectrum of muriceidine C (3)



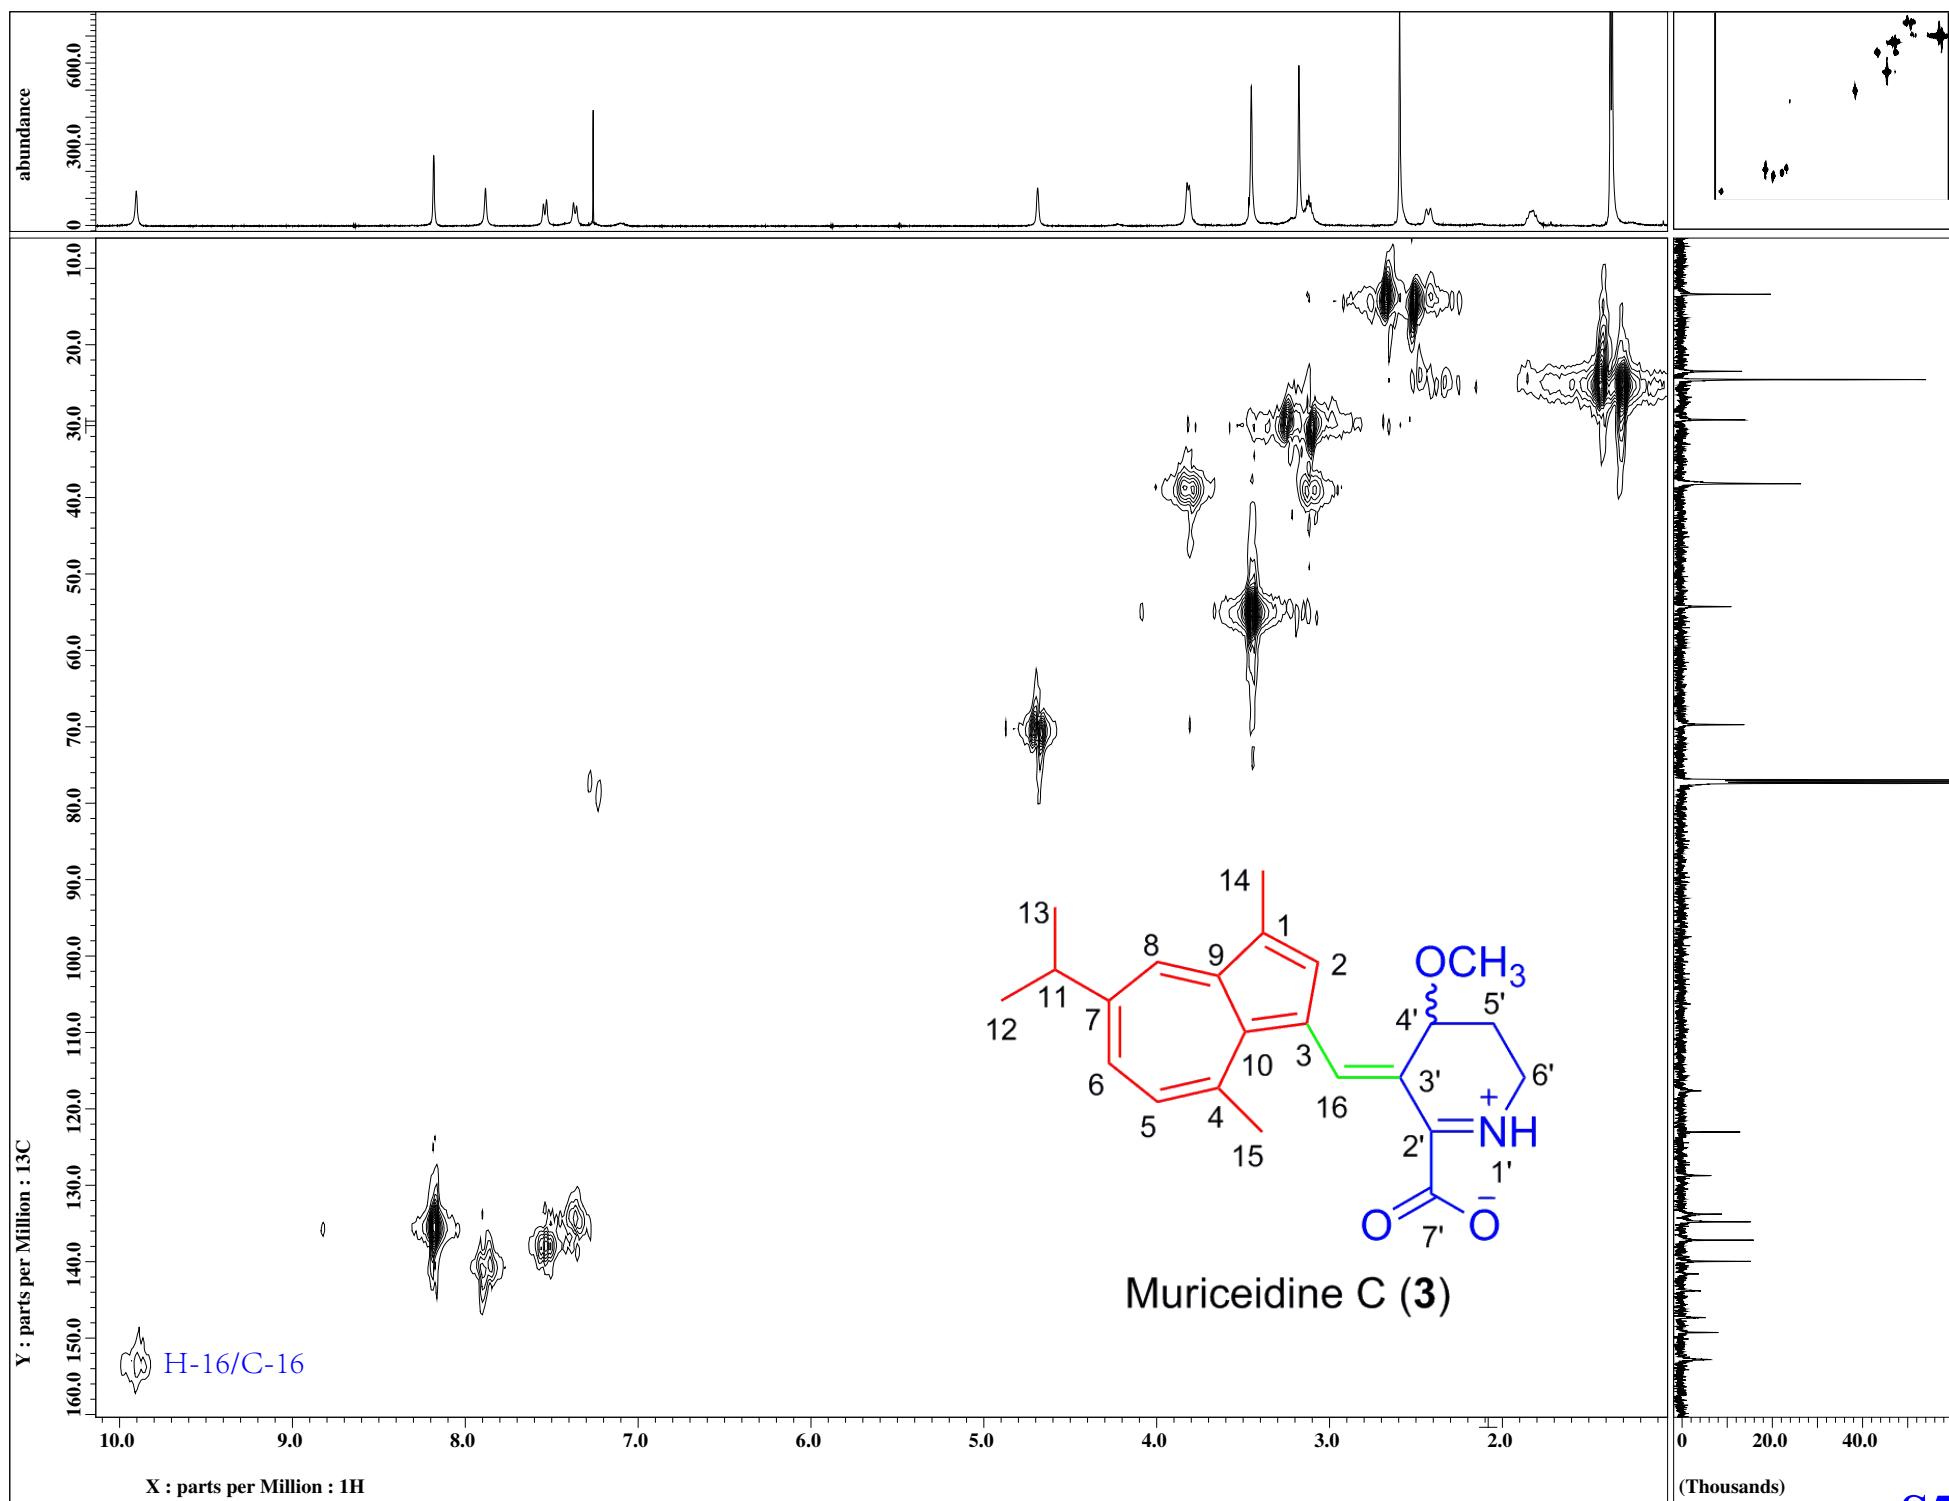

SS30 HMQC spectrum of muriceidine C (3)

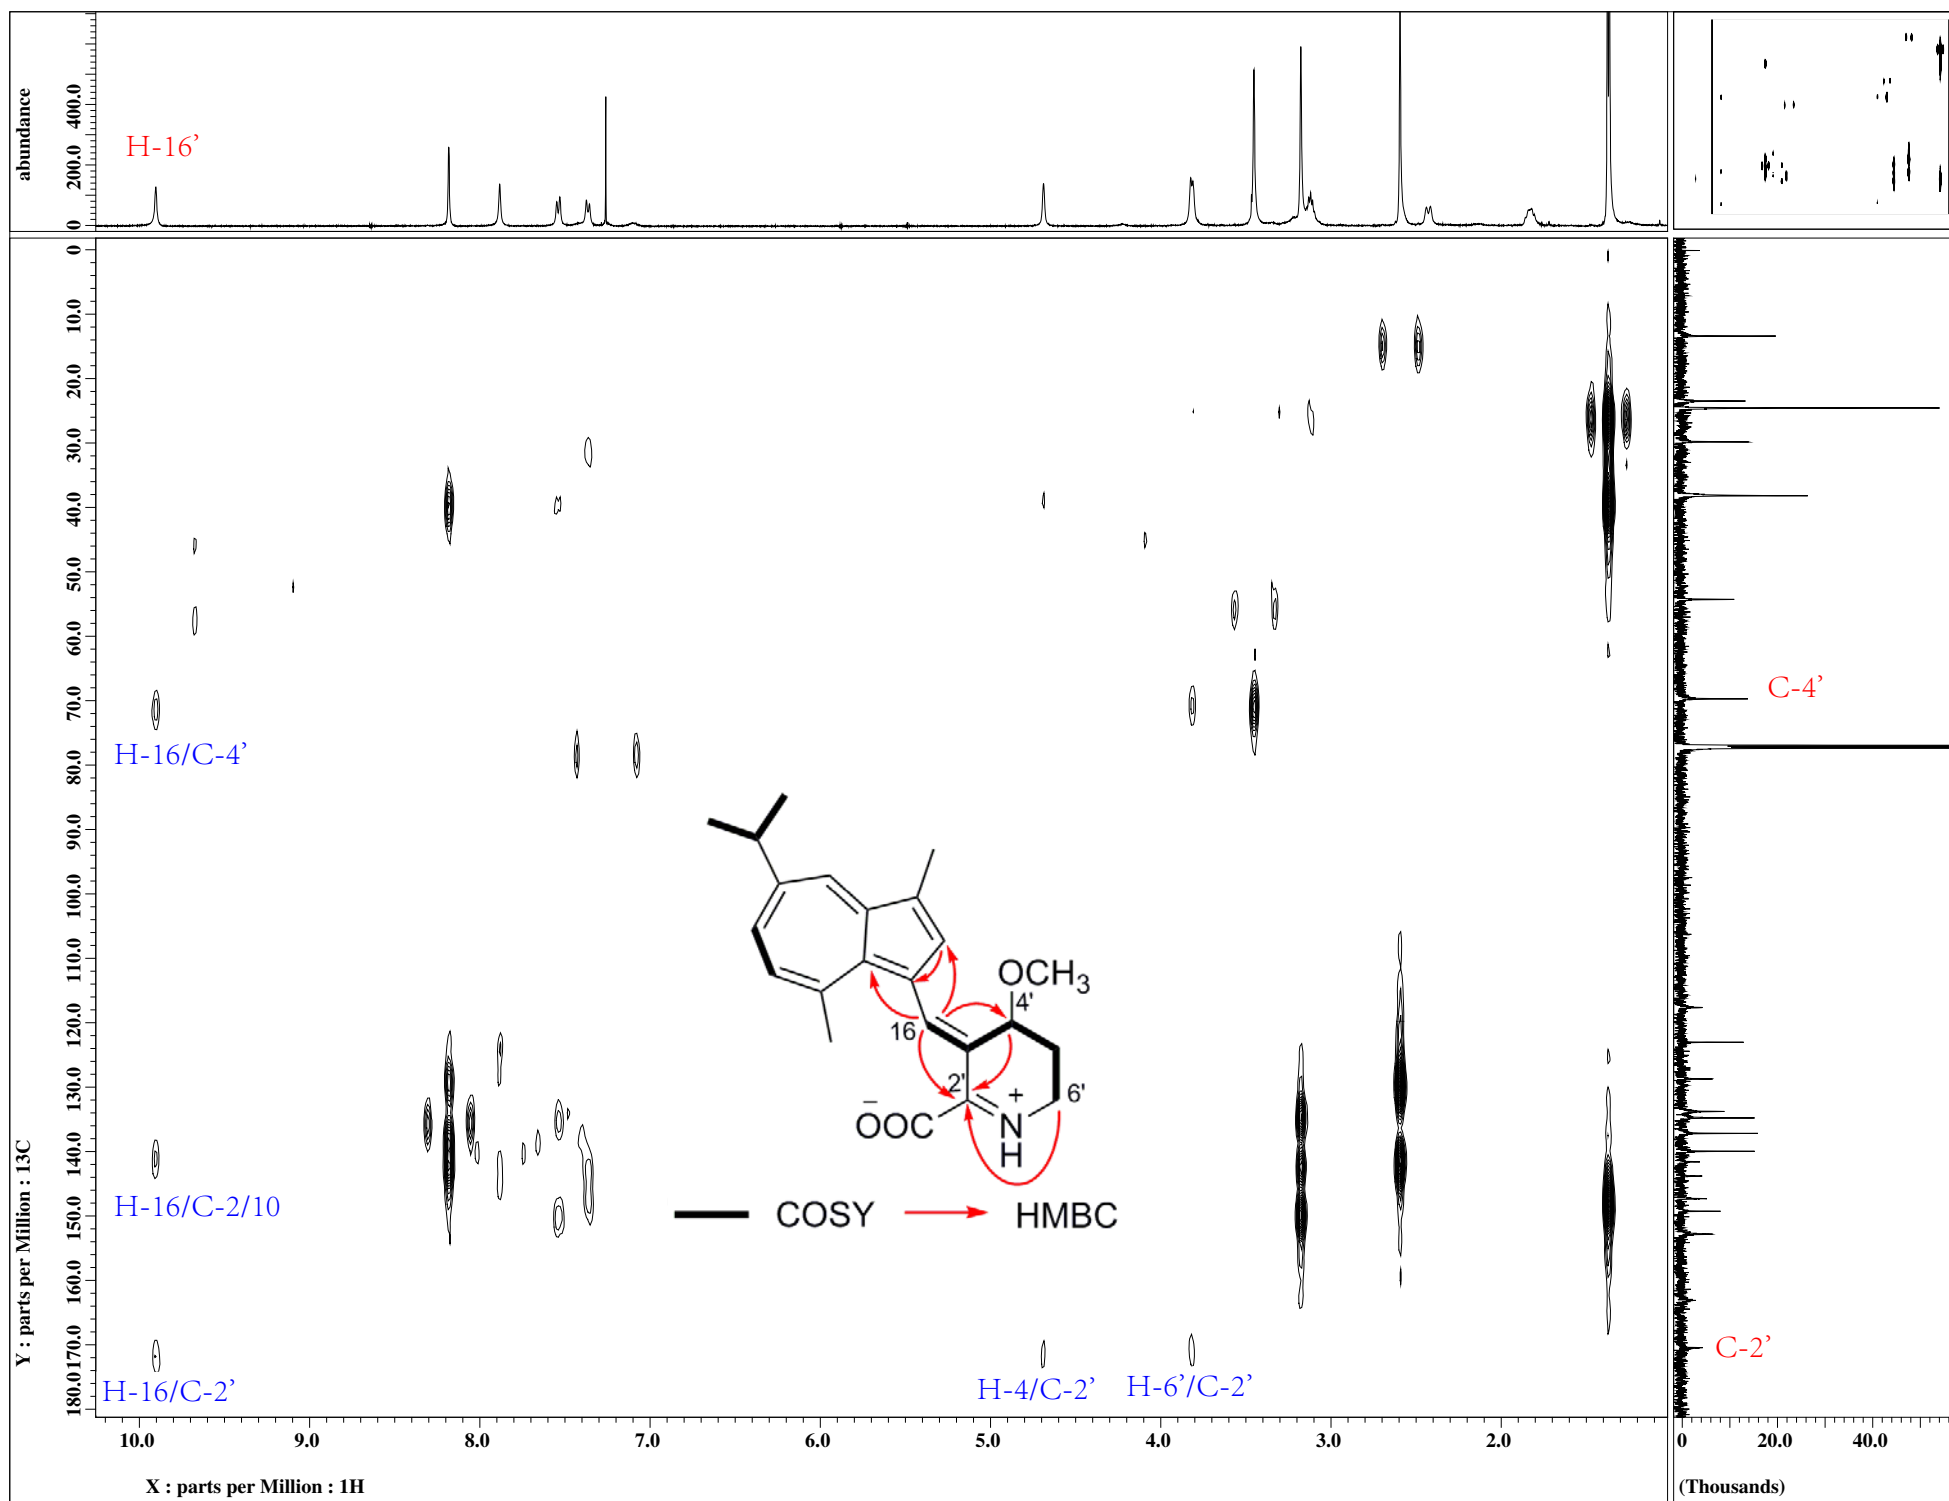

SS31 HMBC spectrum of muriceidine C (3)

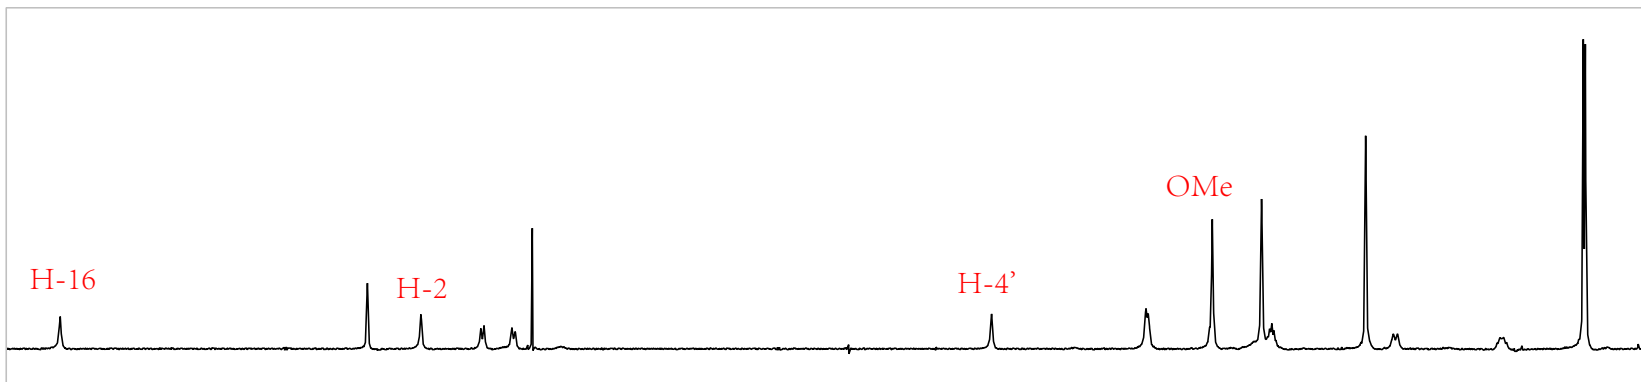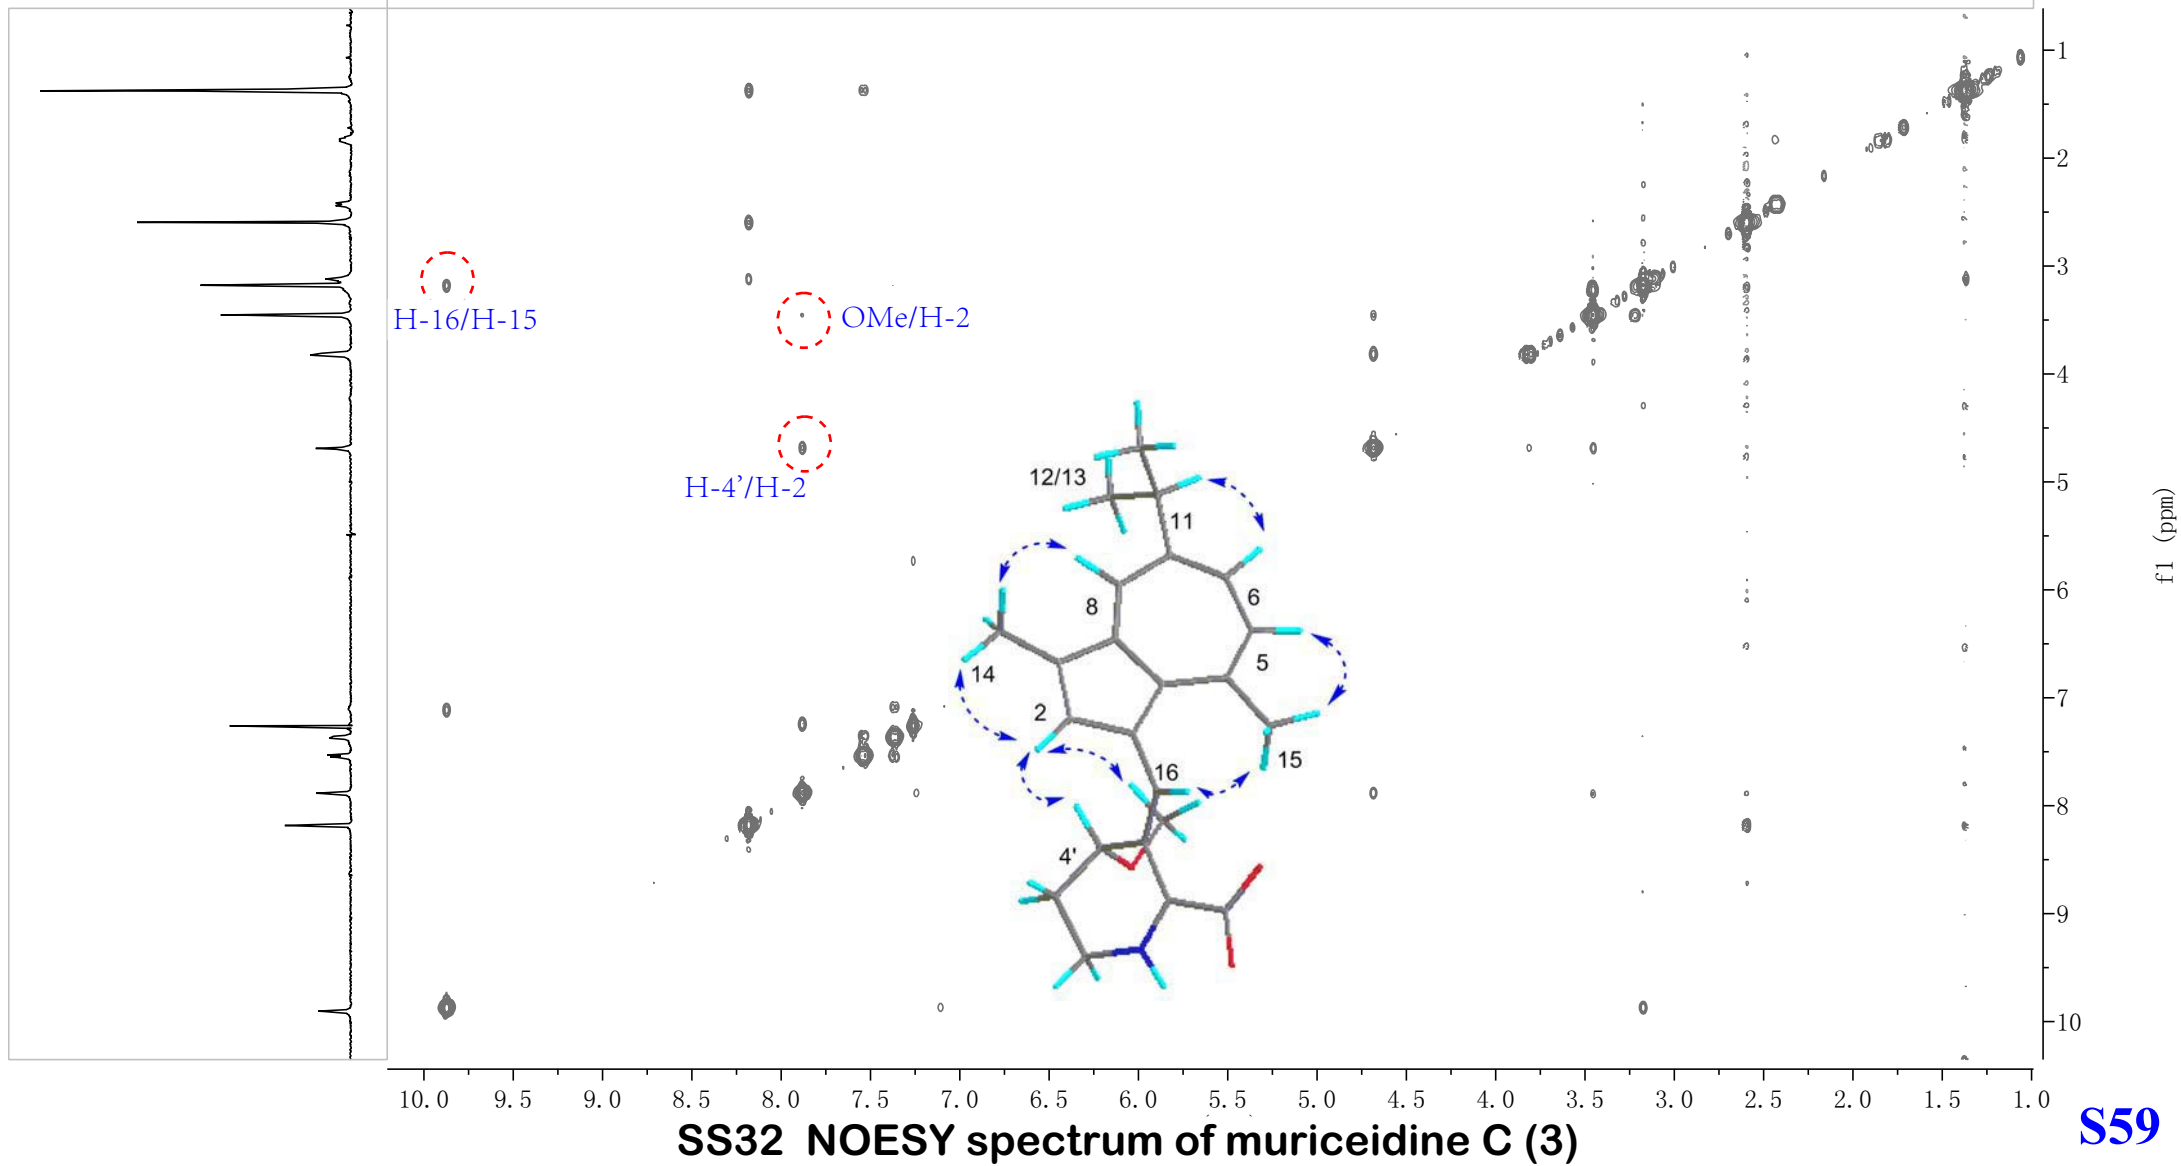

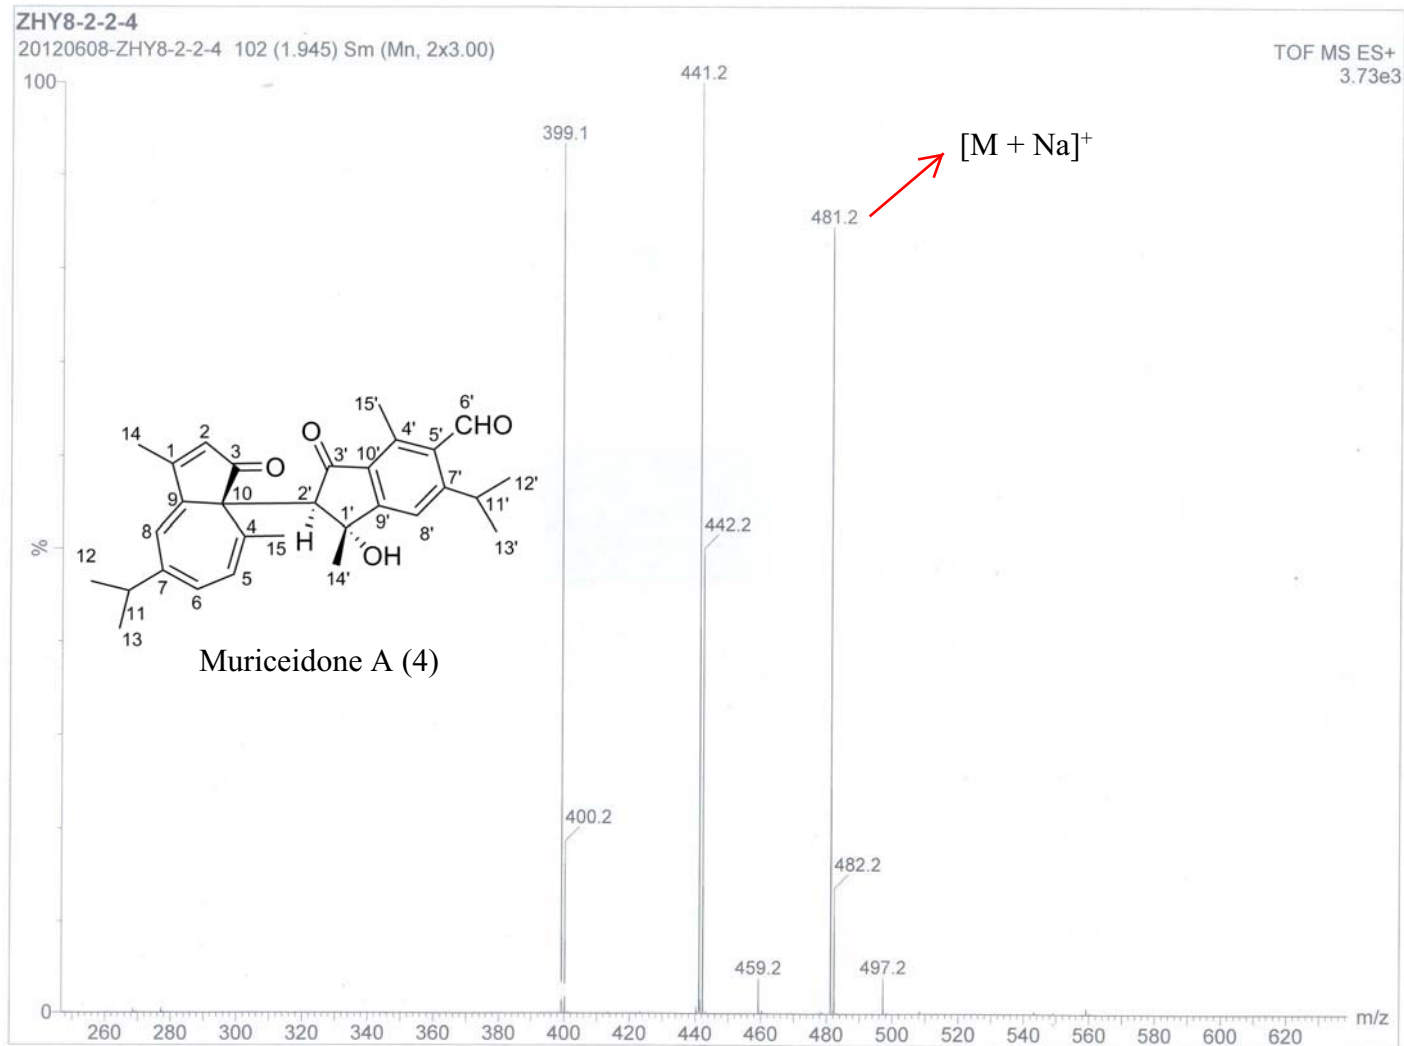

**SS33 The positive ESIMS spectrum of muriceidone A (4)**

20120613-ZHY-8-2-2-4\_120612151233 #11-13 RT: 0.25-0.30 AV: 3 NL: 1.60E7  
T: FTMS + p ESI Full ms [155.00-2000.00]

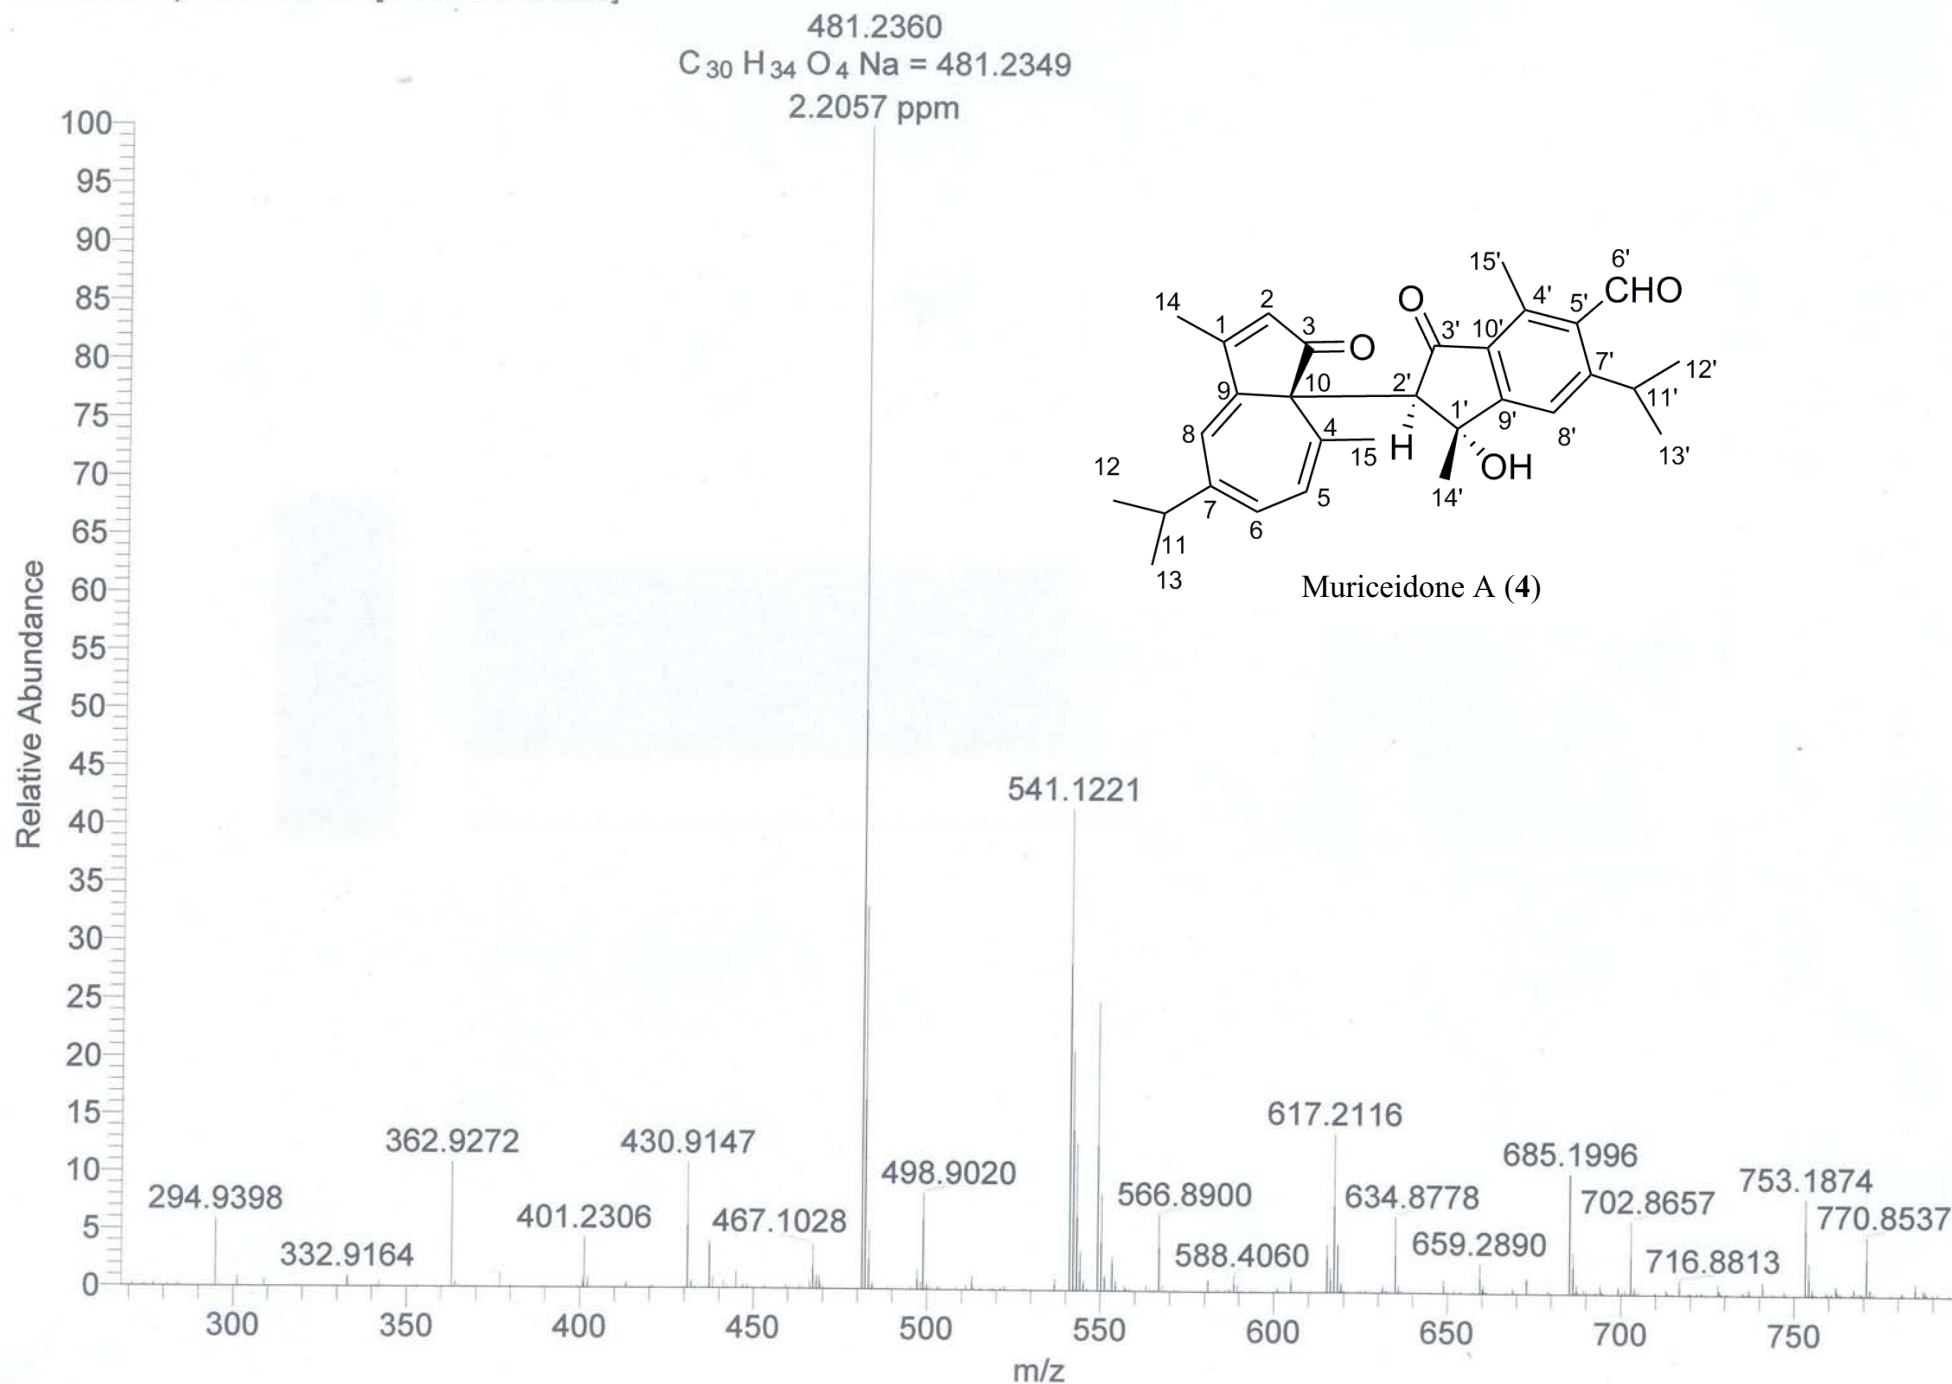

SS34 The positive HRESIMS spectrum of muriceidone A (4)

-10.6067

-7.4888  
-7.2597  
-6.5488  
-6.5378  
-6.4417  
-6.2666  
-6.2559  
-6.1913

3.6059  
3.5946  
3.5832

2.6928  
2.3076  
1.8721  
1.8306  
1.3043  
1.2929  
1.2789  
1.2675  
1.1761  
1.1646  
1.1330  
1.1216  
0.6032

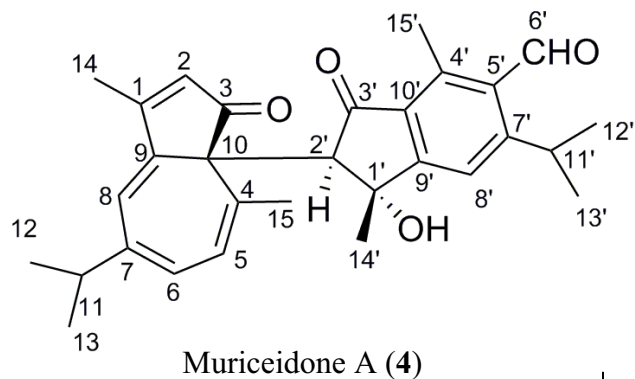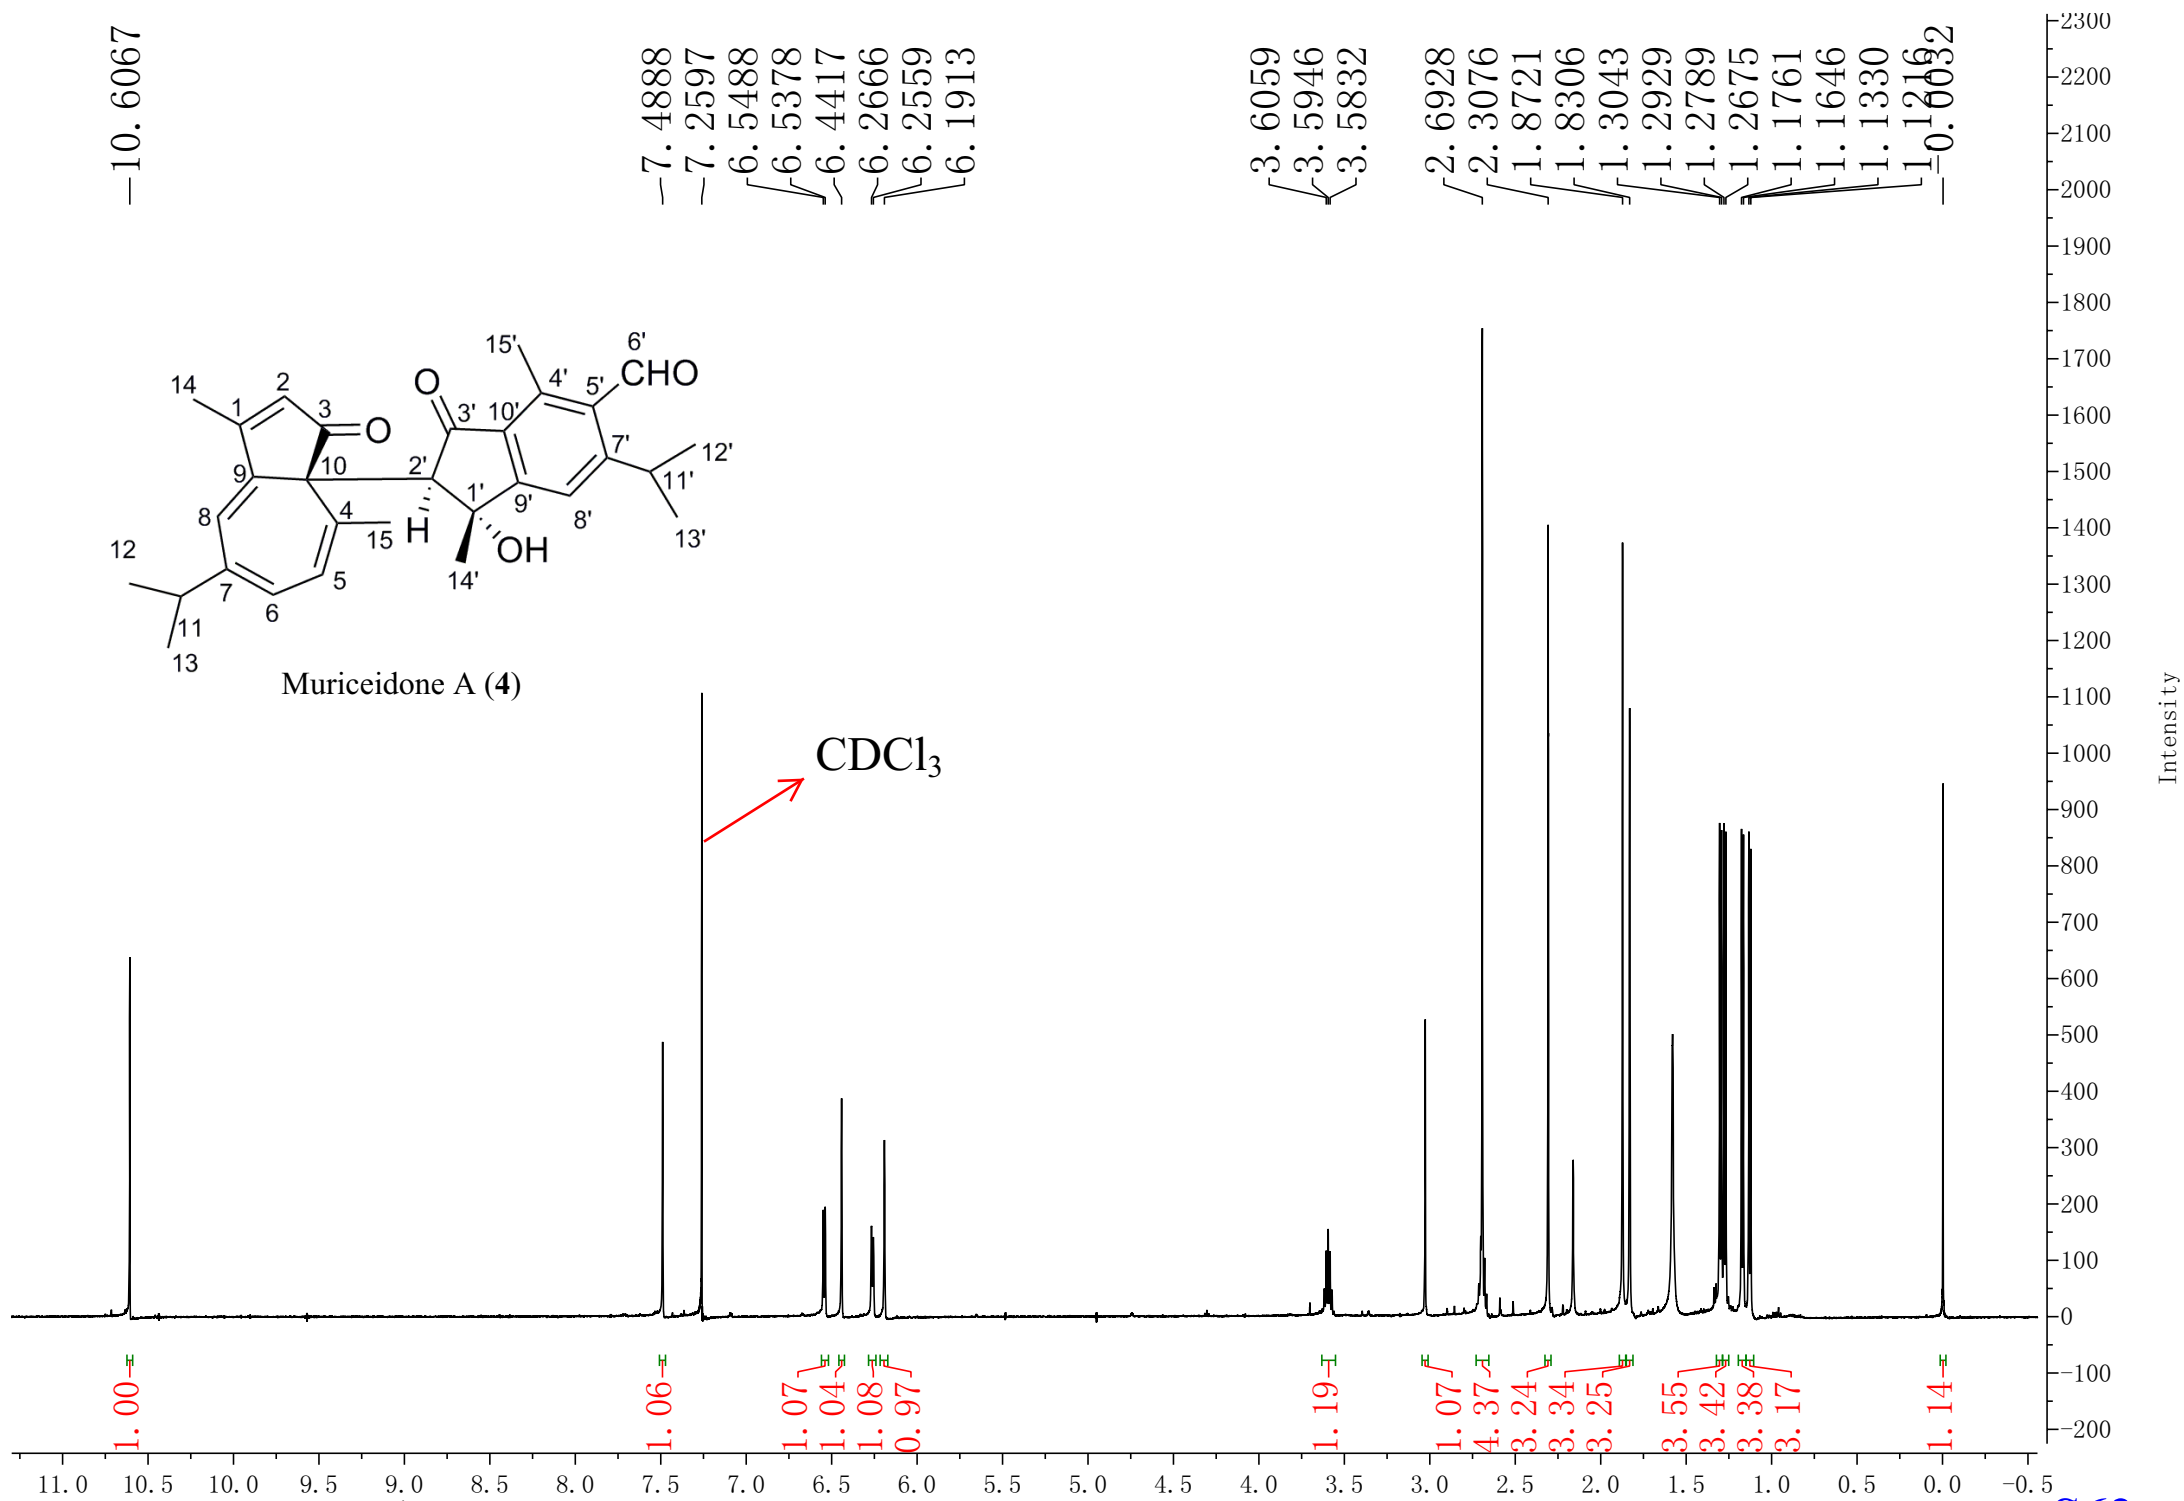

SS35 <sup>1</sup>H NMR (600 MHz, CDCl<sub>3</sub>) spectrum of muriceidone A (4)

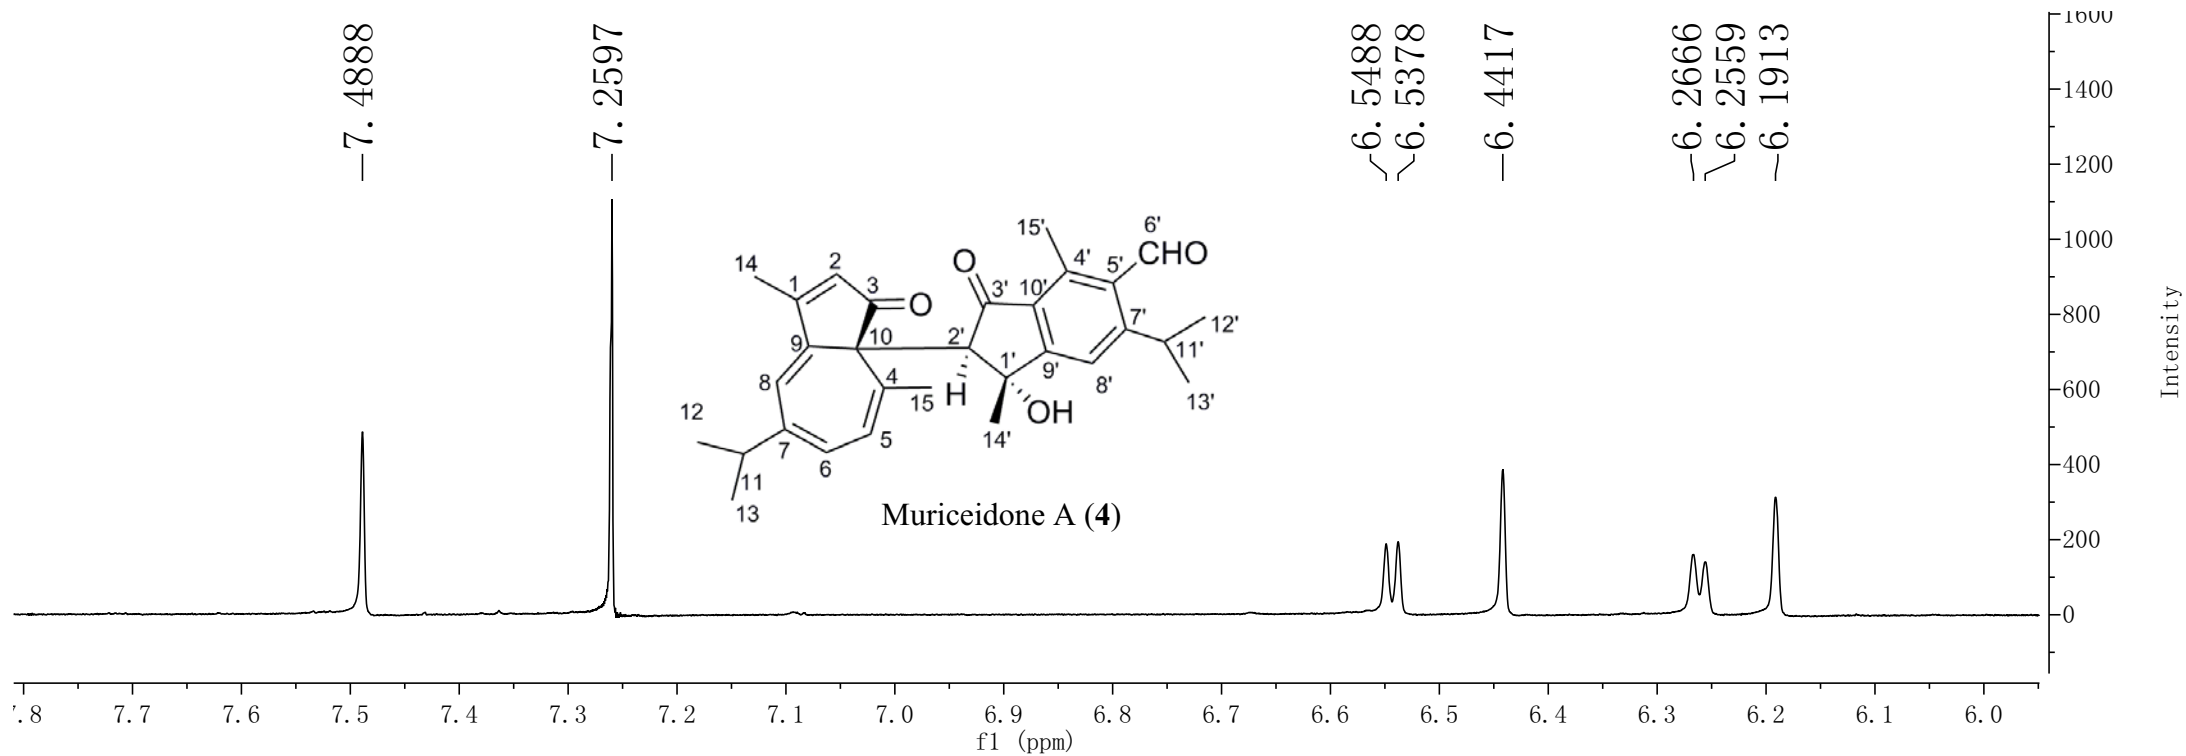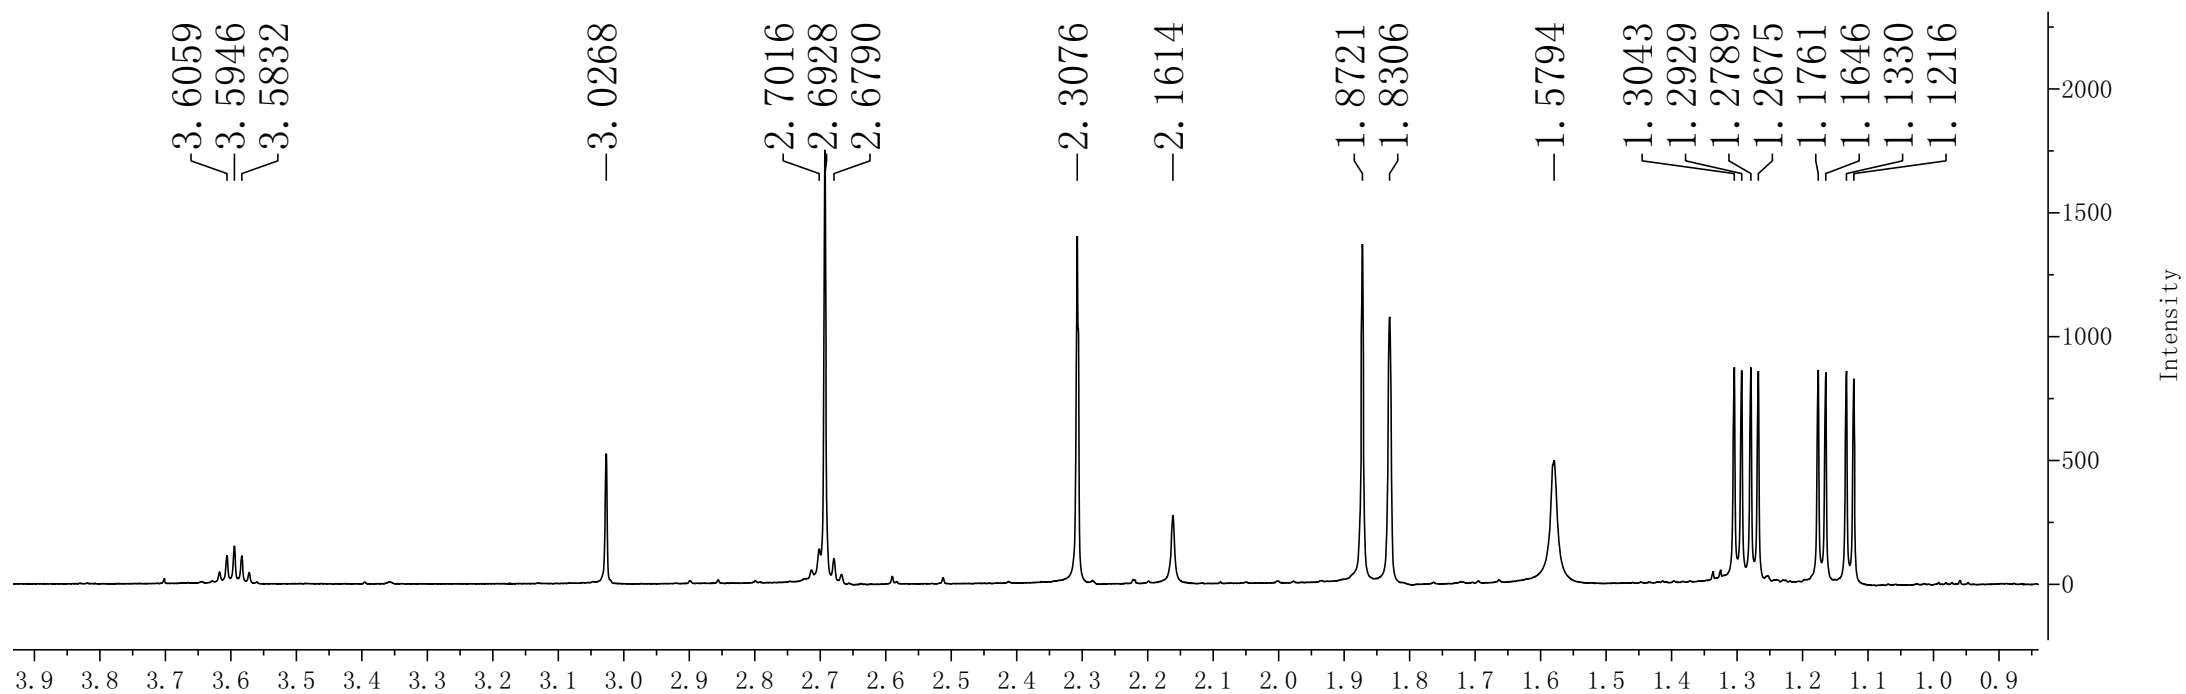

SS36 The amplicator <sup>1</sup>H NMR spectrum of muriceidone A (4)

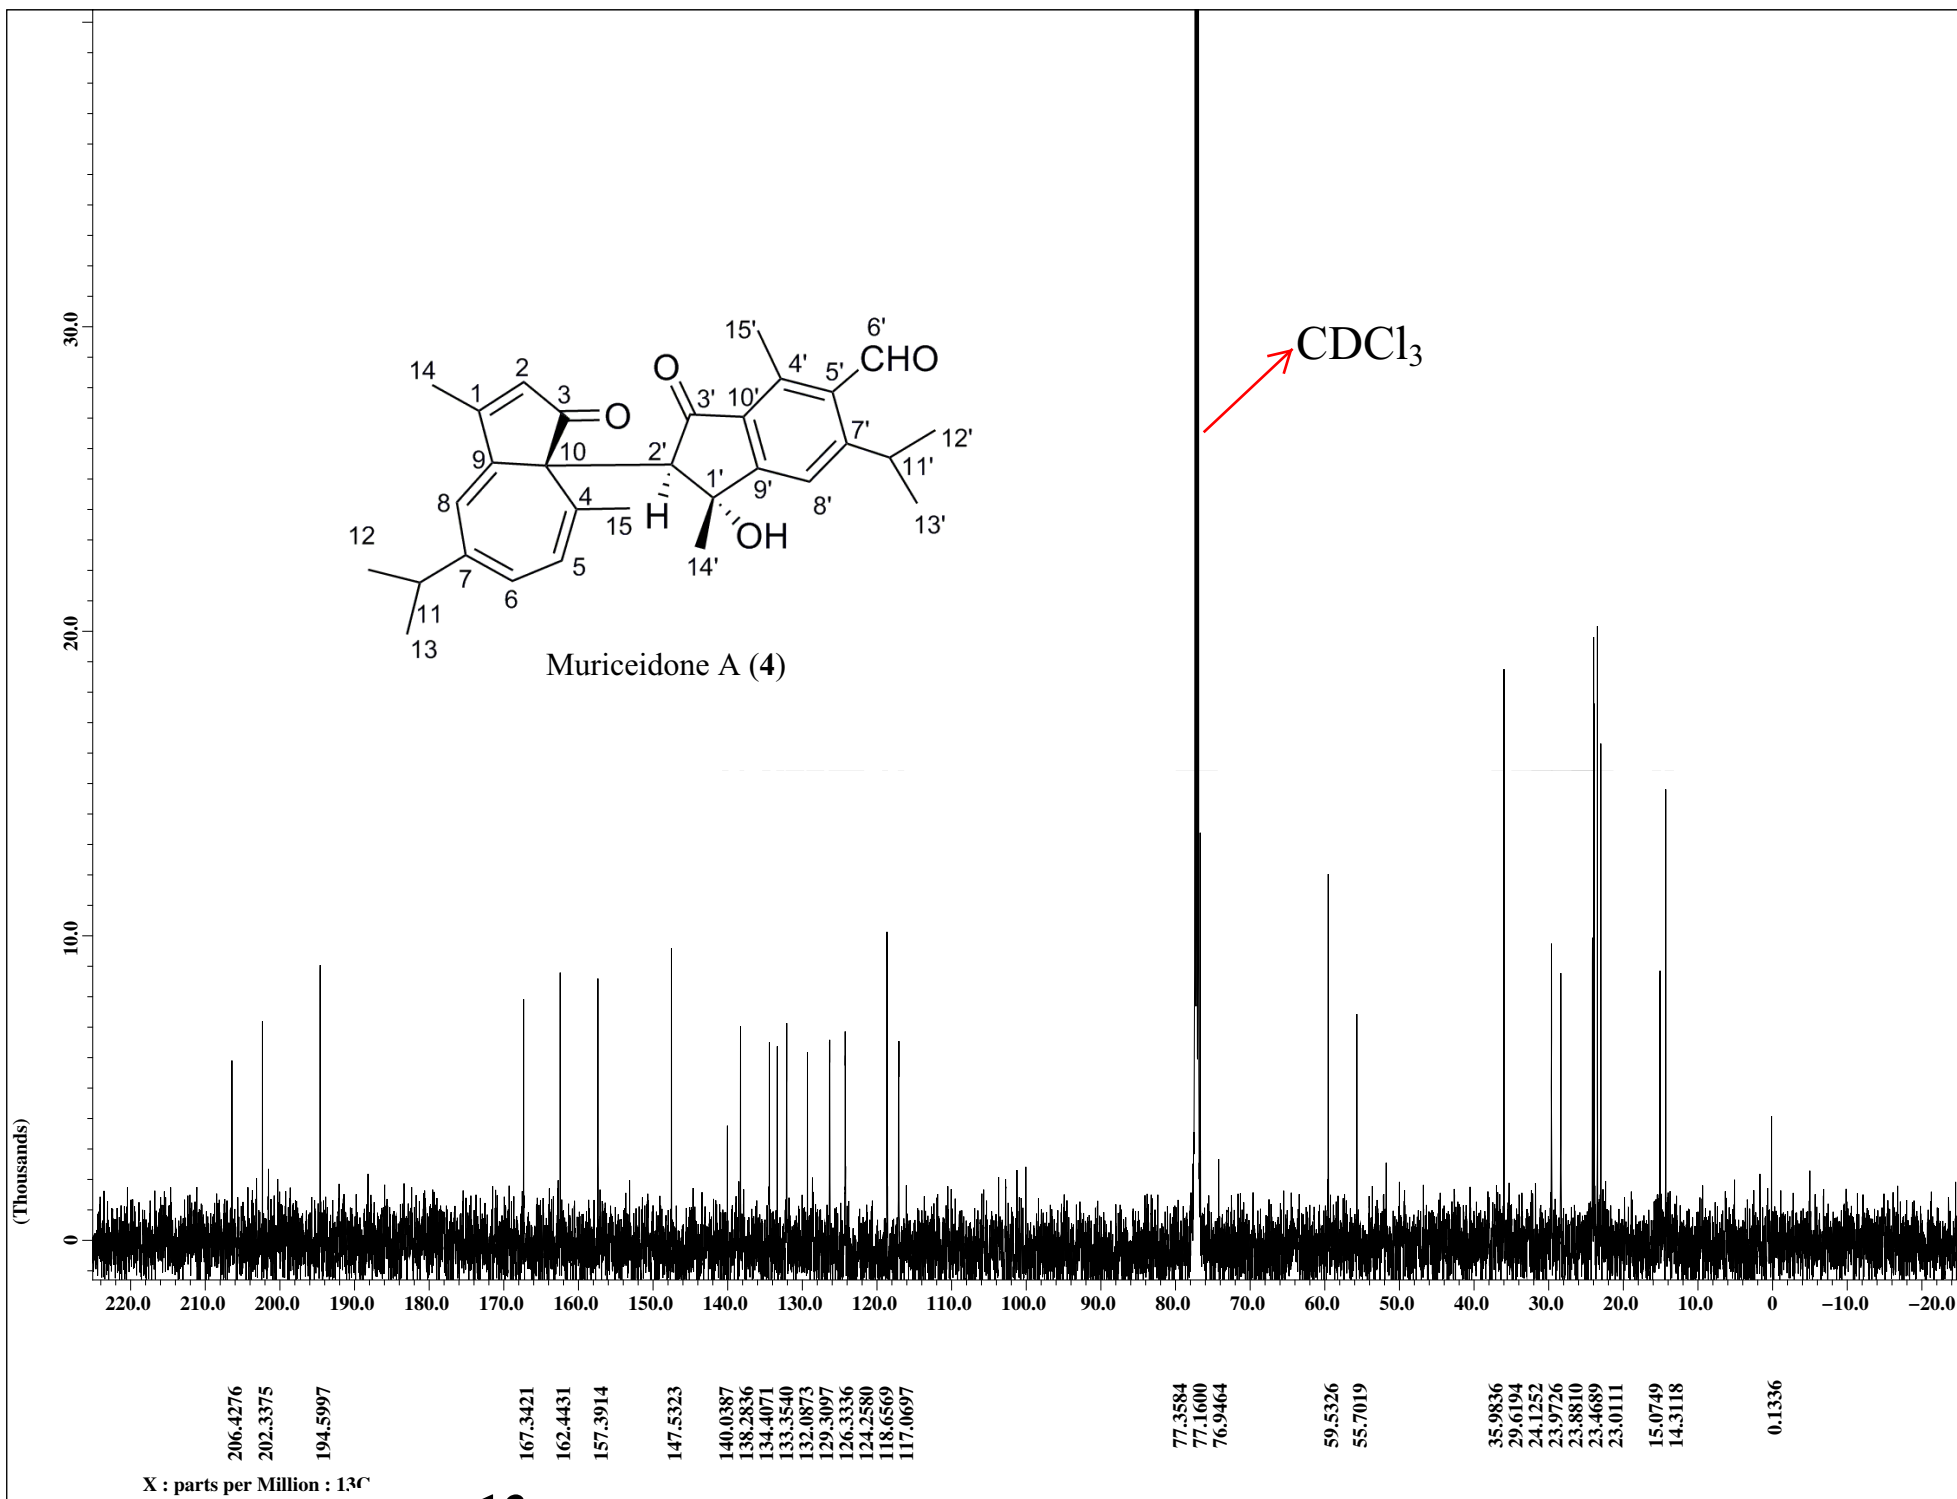

SS37  $^{13}\text{C}$  NMR (150 MHz,  $\text{CDCl}_3$ ) spectrum of muriceidone A (4) S64



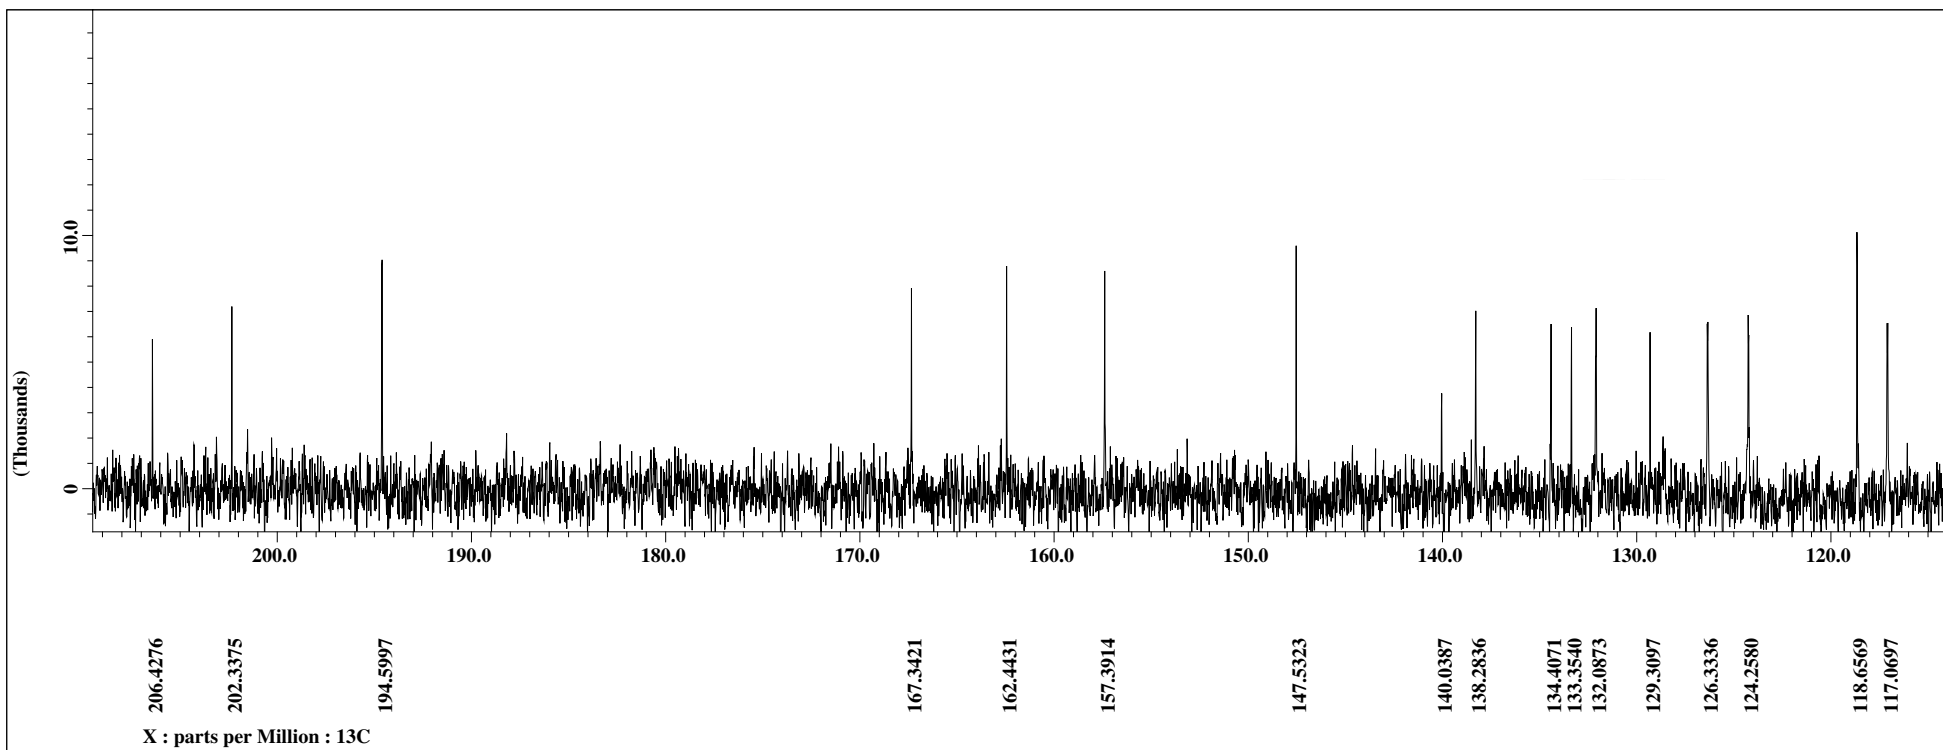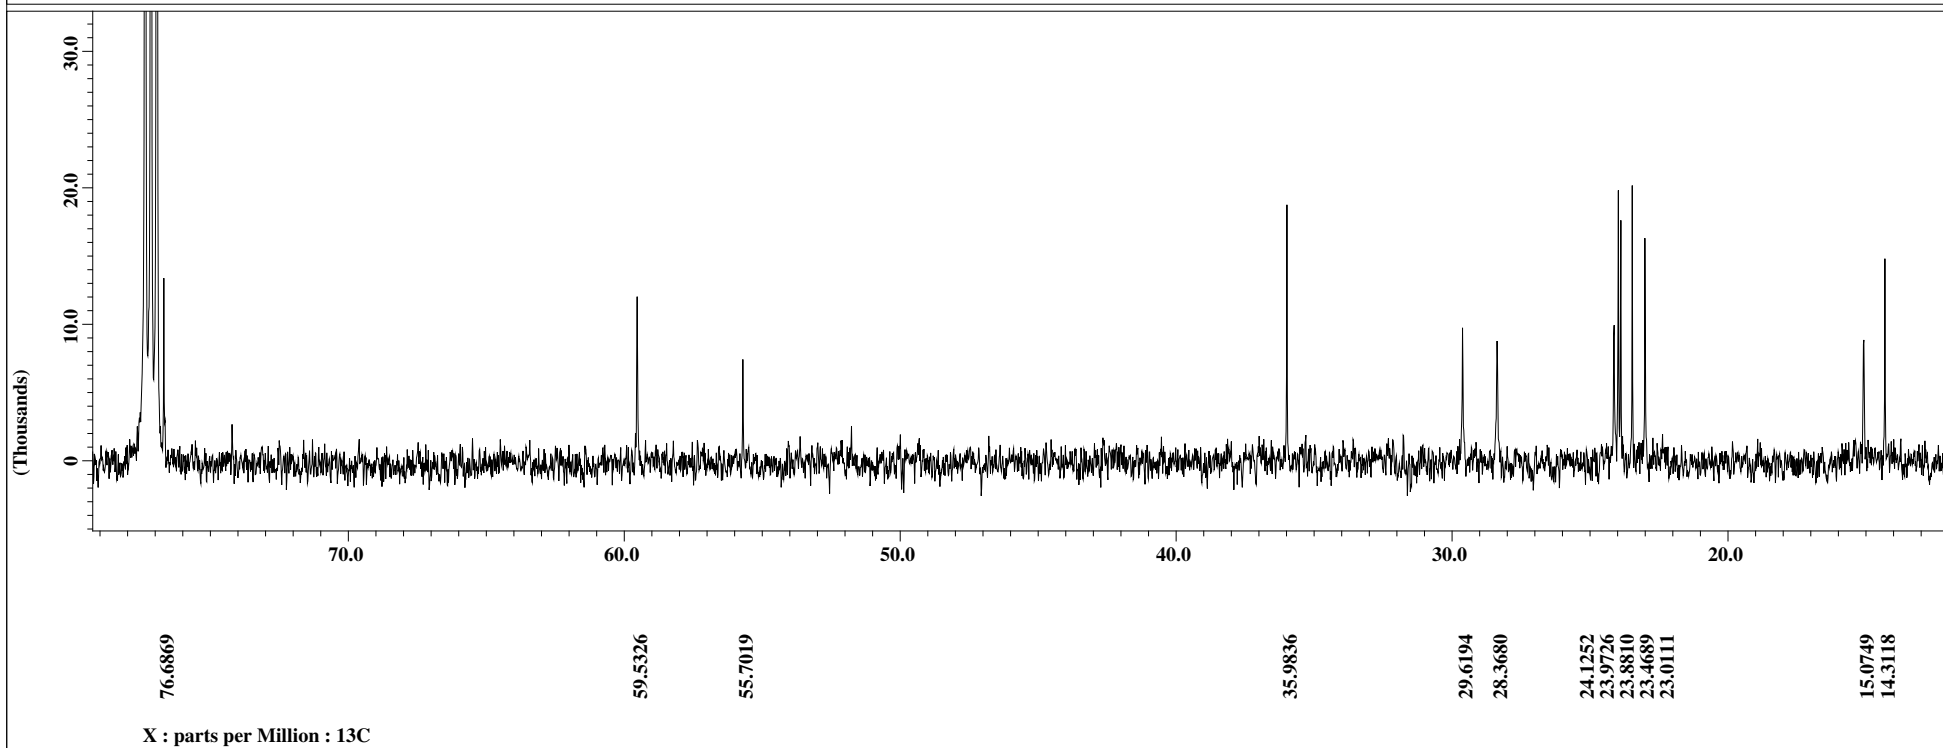

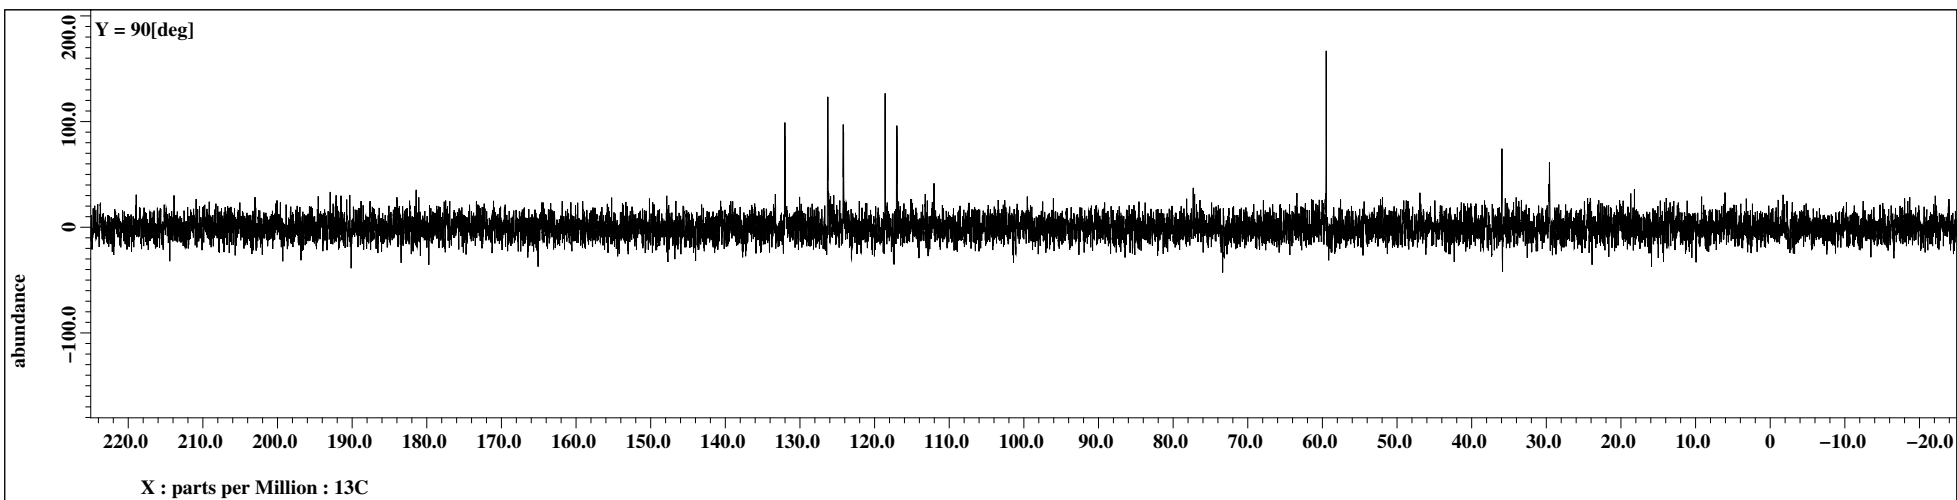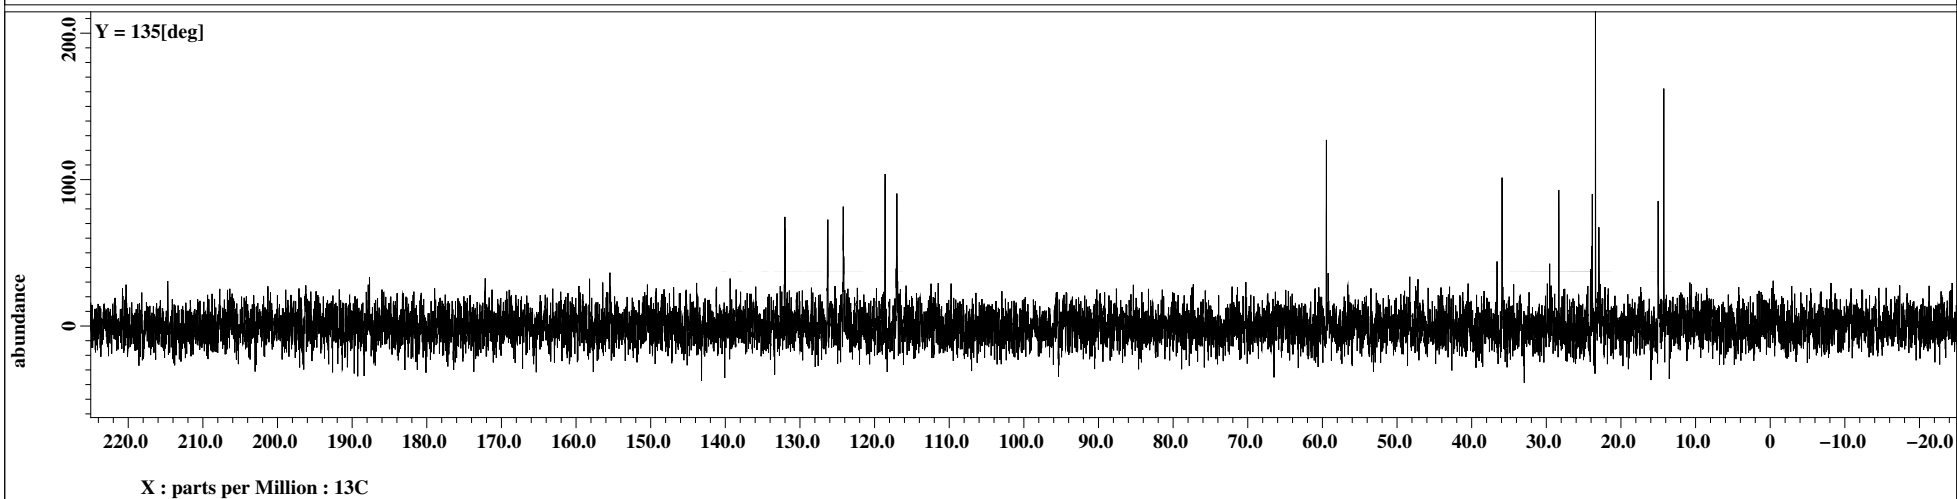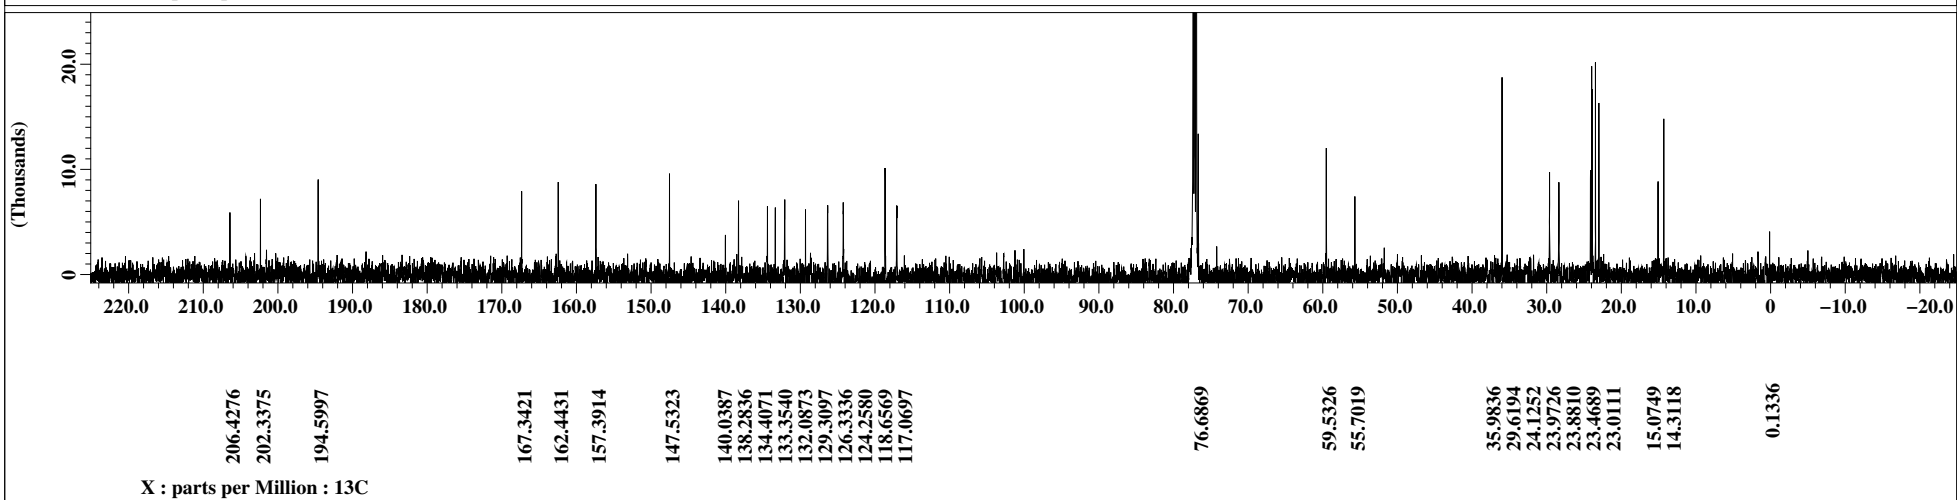

SS39 DEPT spectrum of muriceidone A (4)

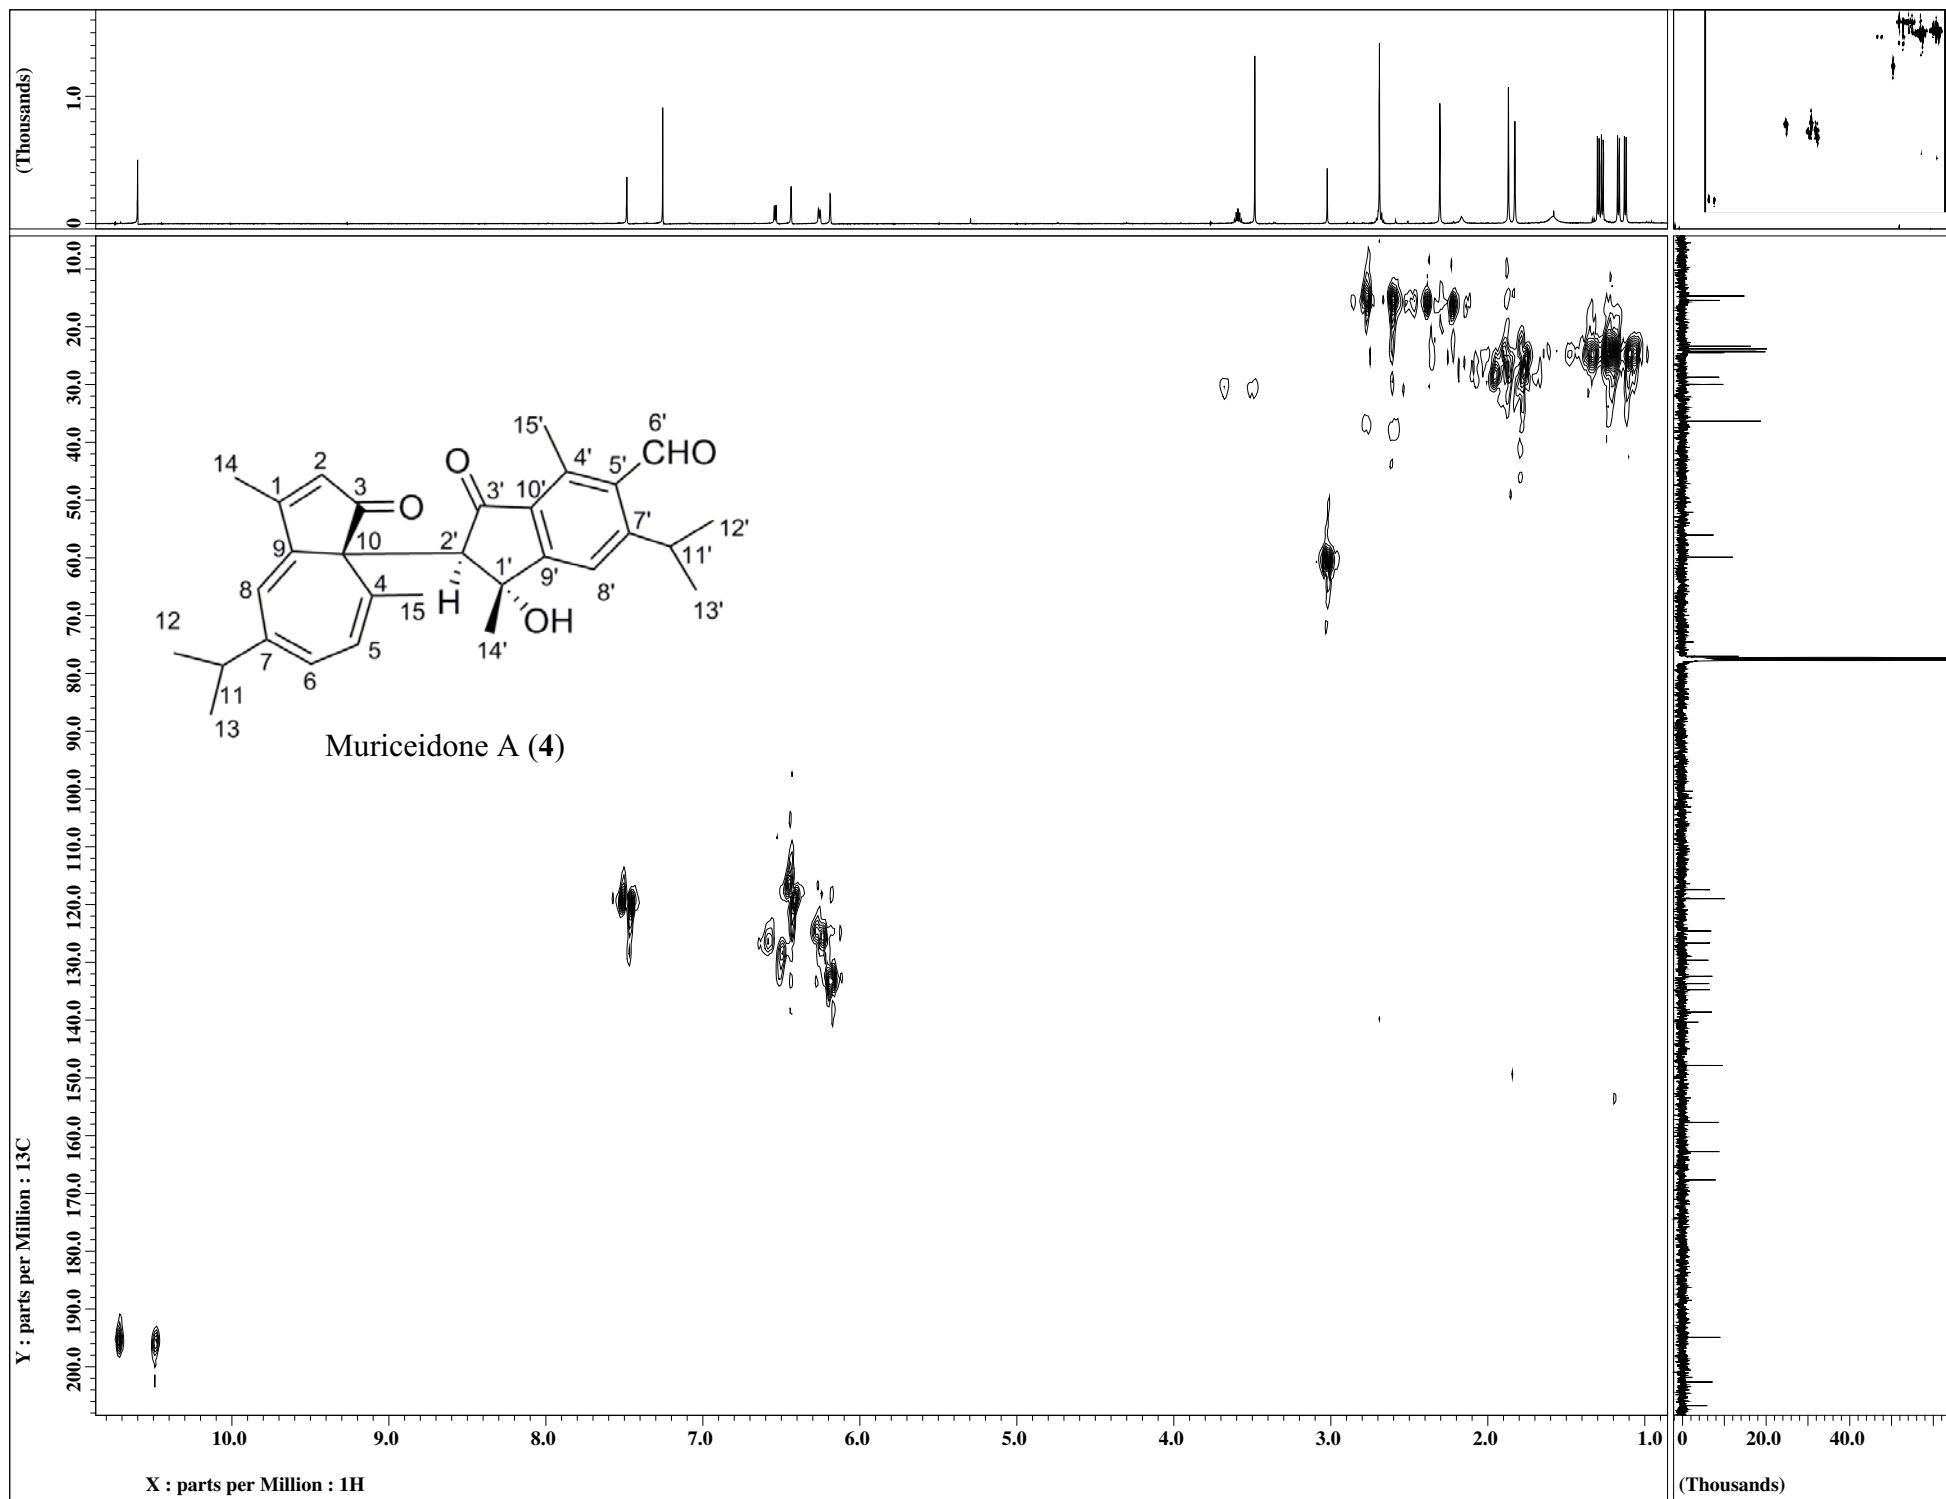

SS40 HMQC spectrum of muriceidone A (4)

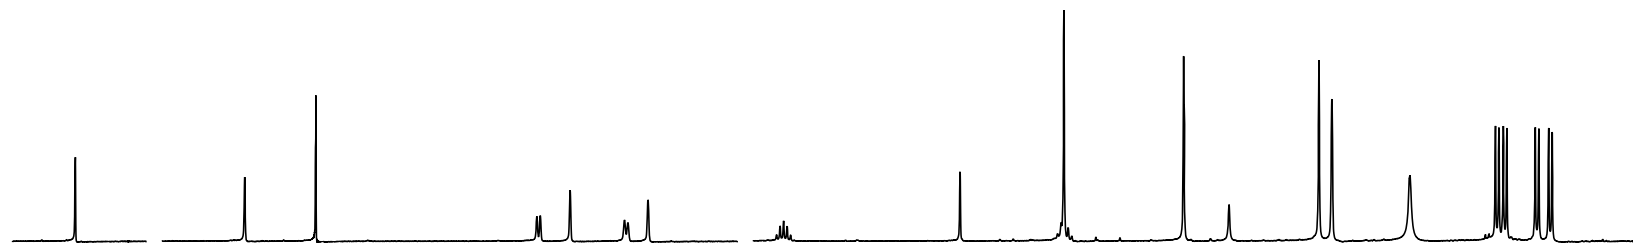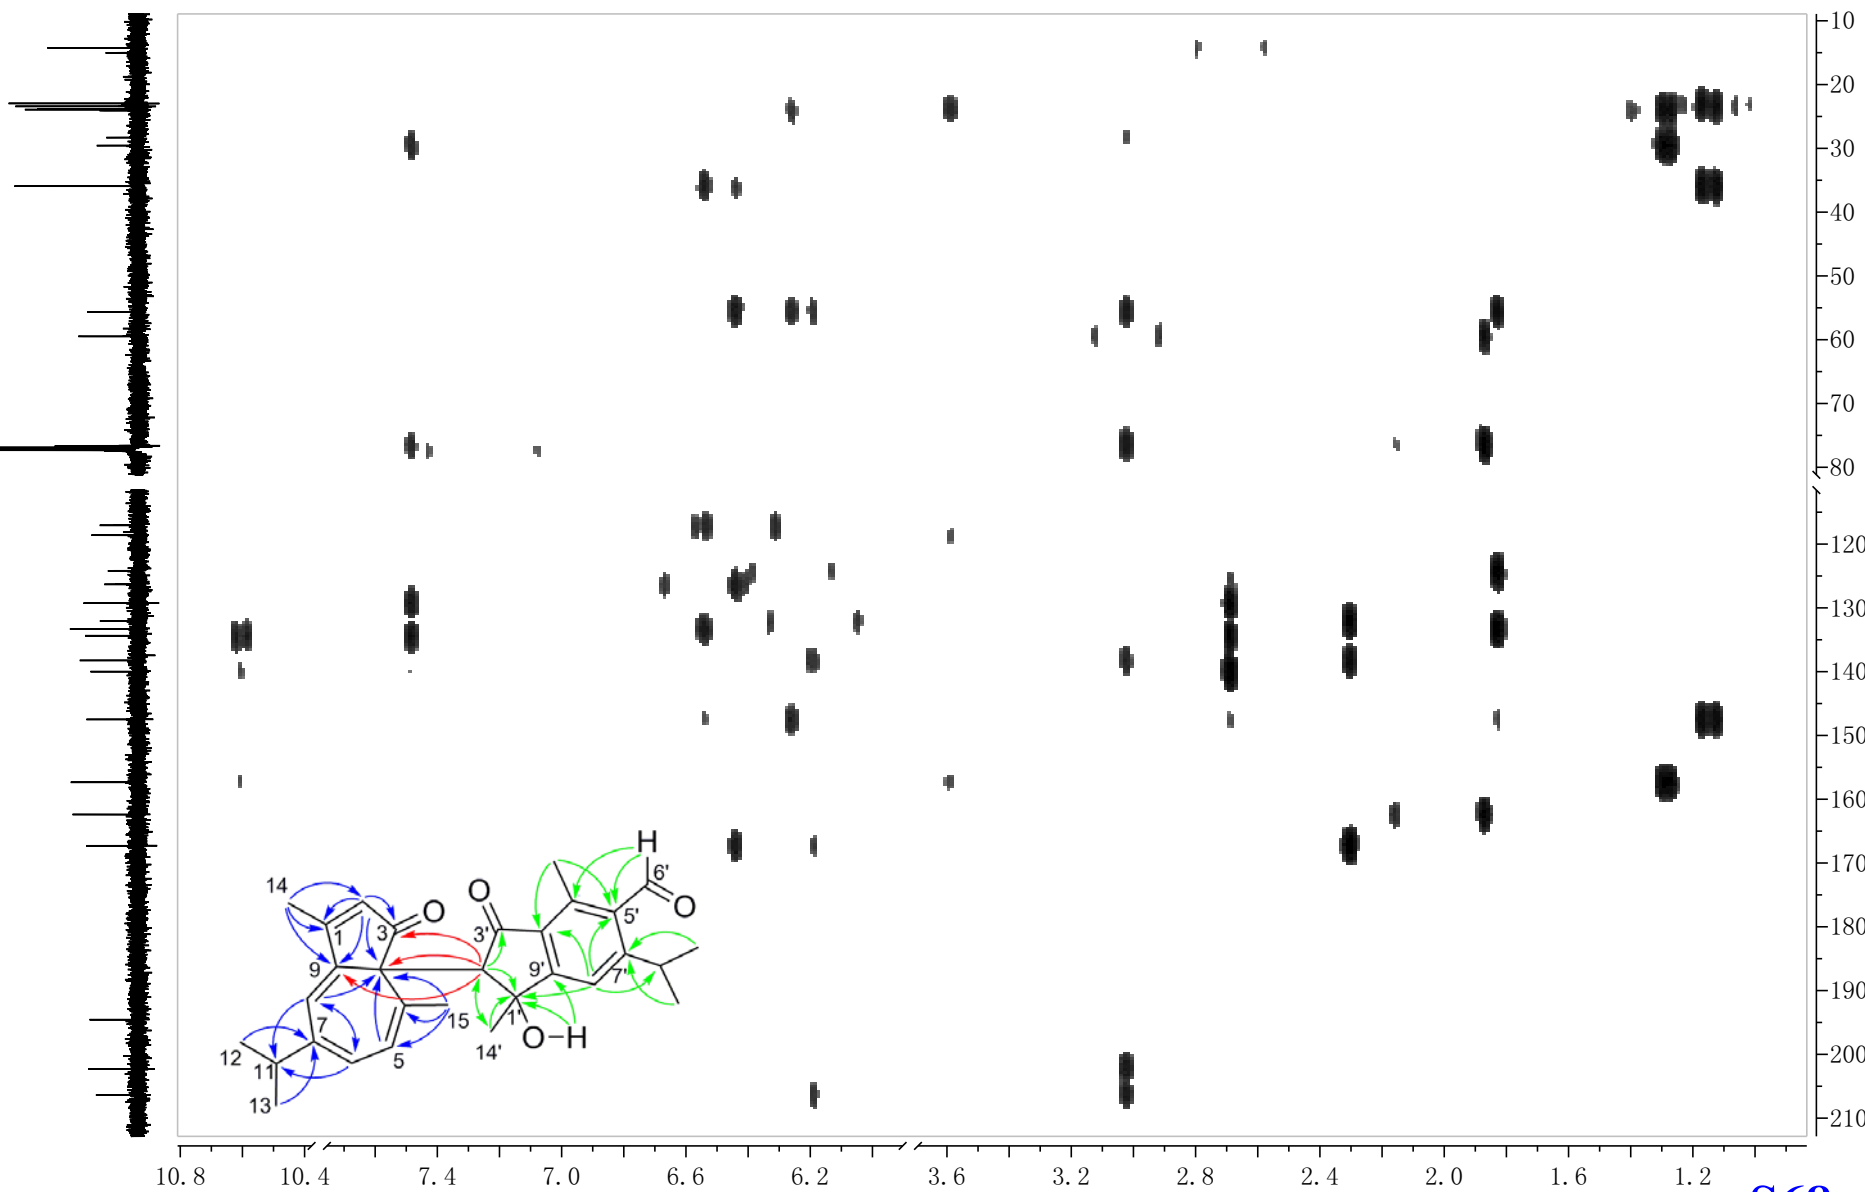

SS41 HMBC spectrum of muriceidone A (4)

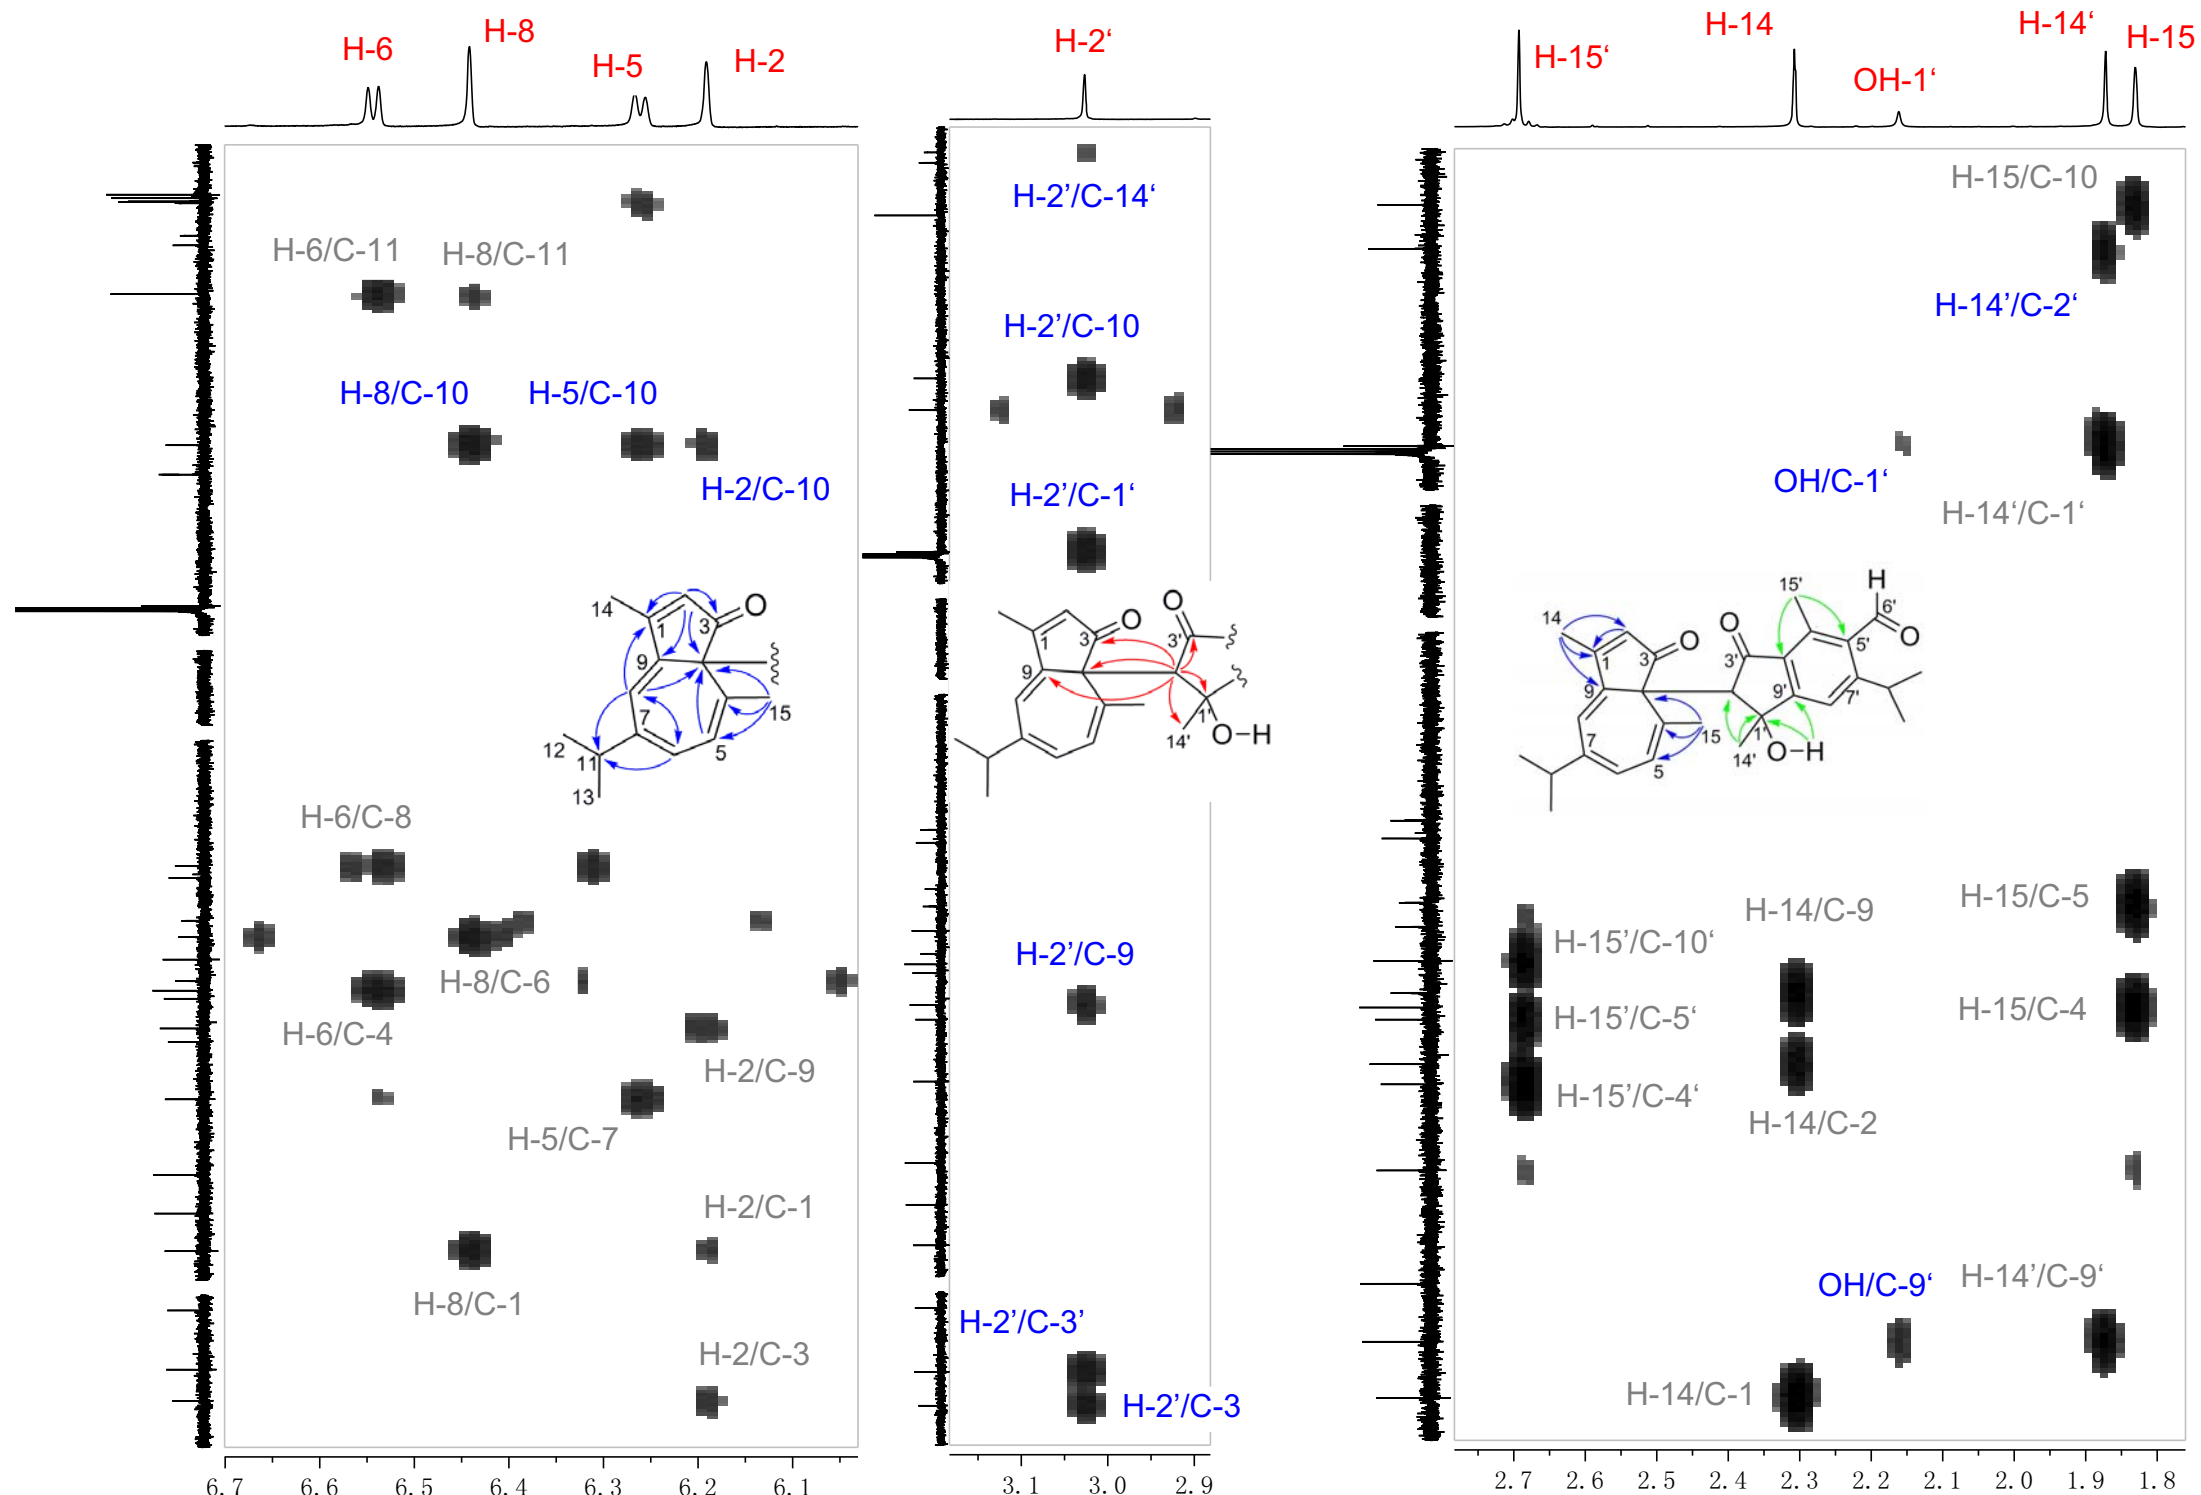

SS42 The amplificatory HMBC spectrum of muriceidone A (4)

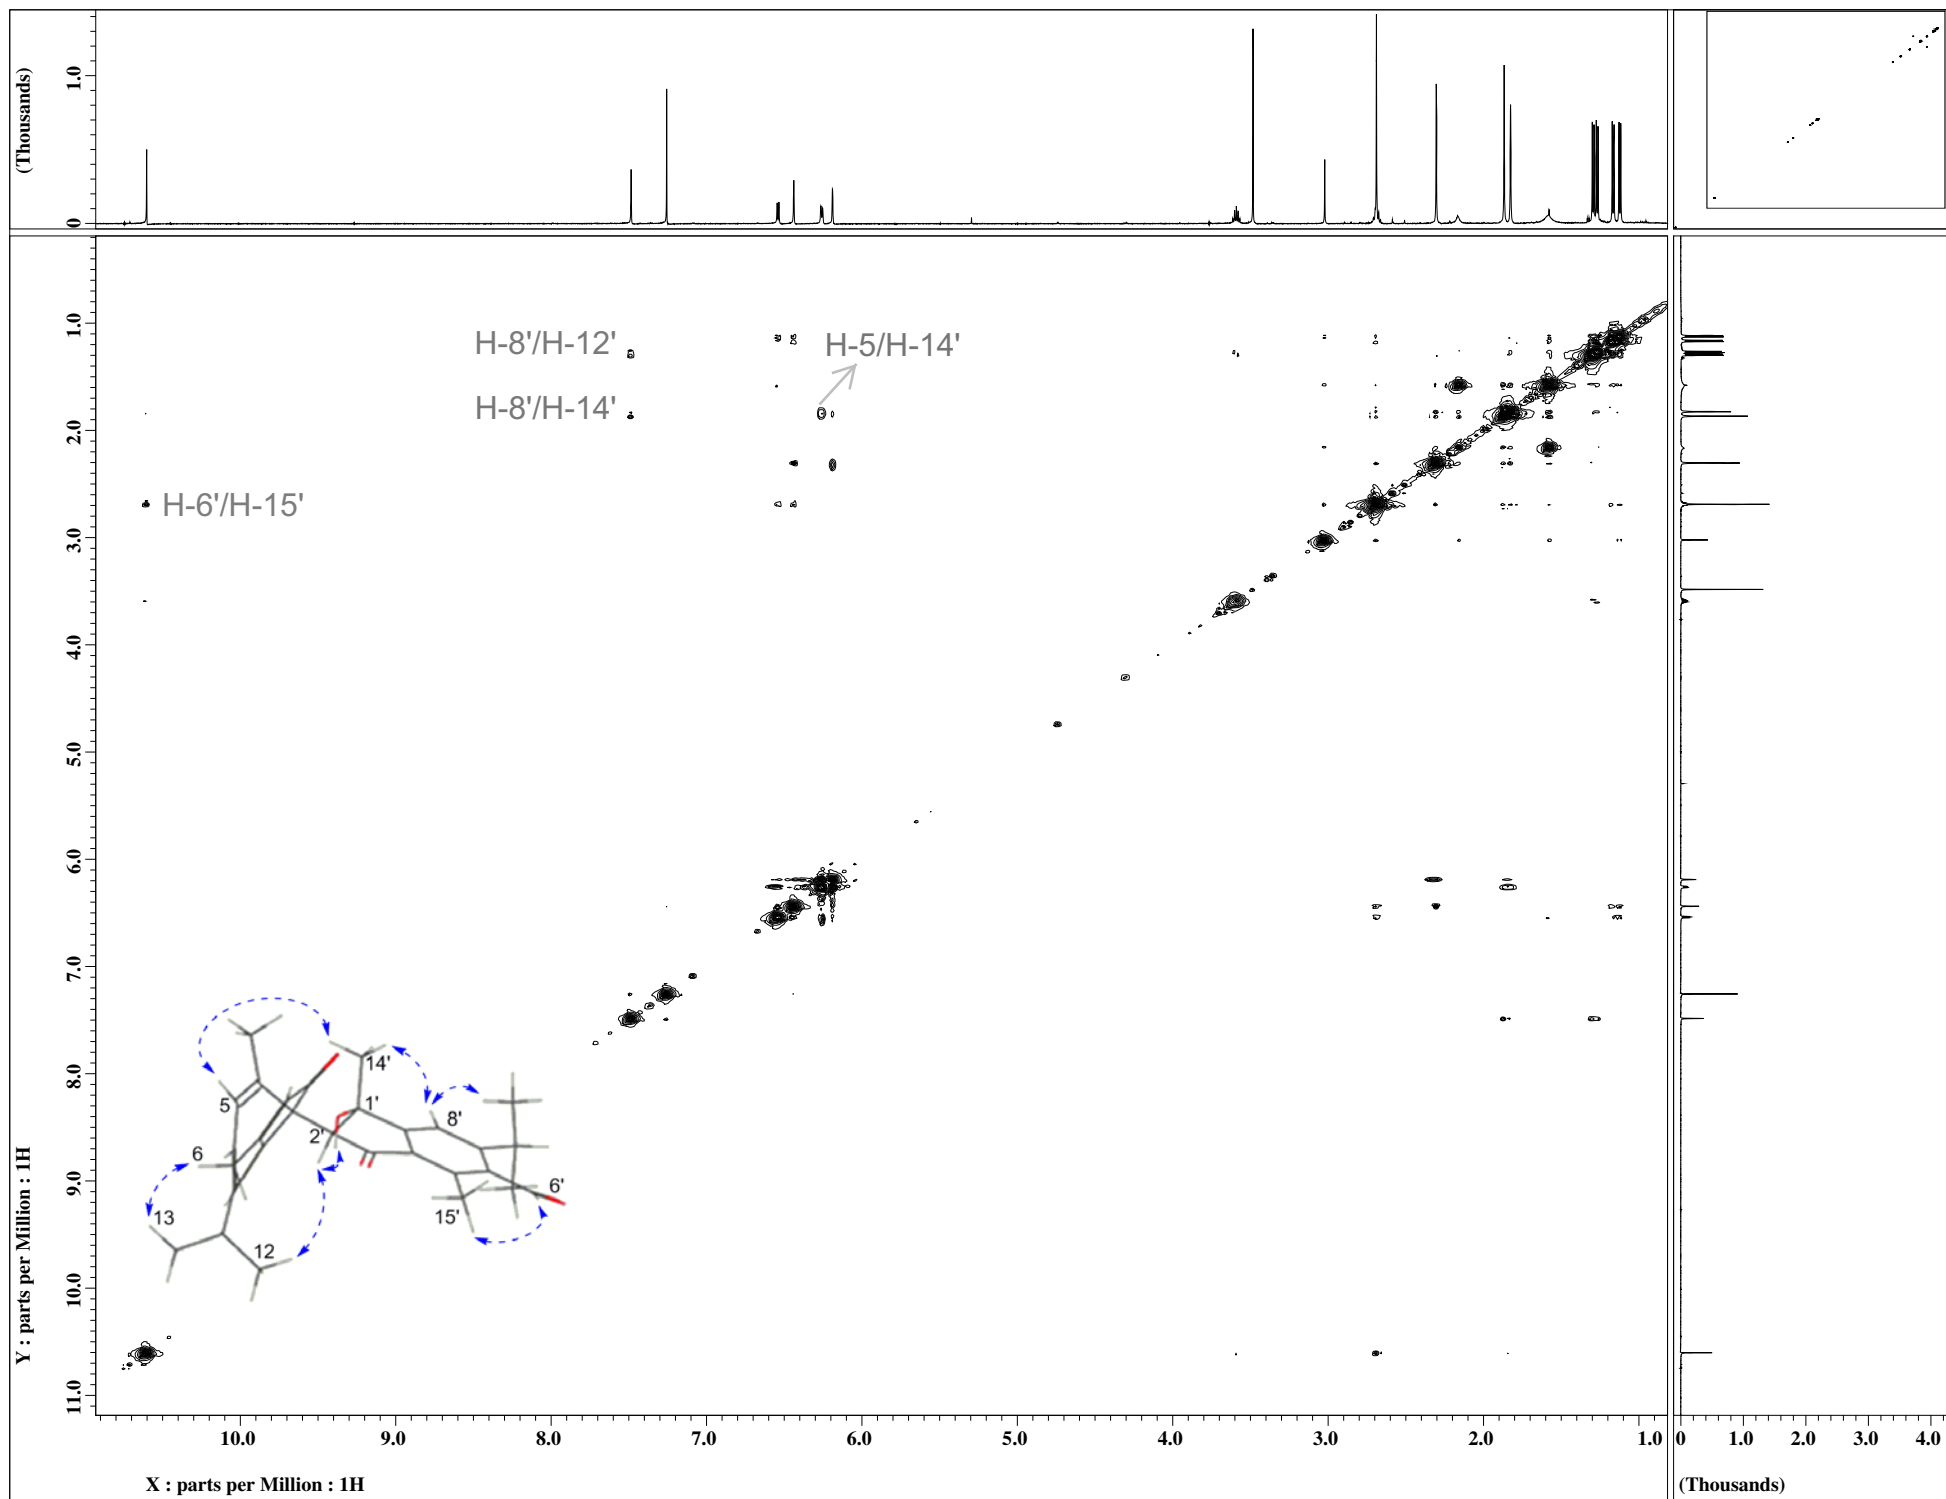

SS43 NOESY spectrum of muriceidine C (4)

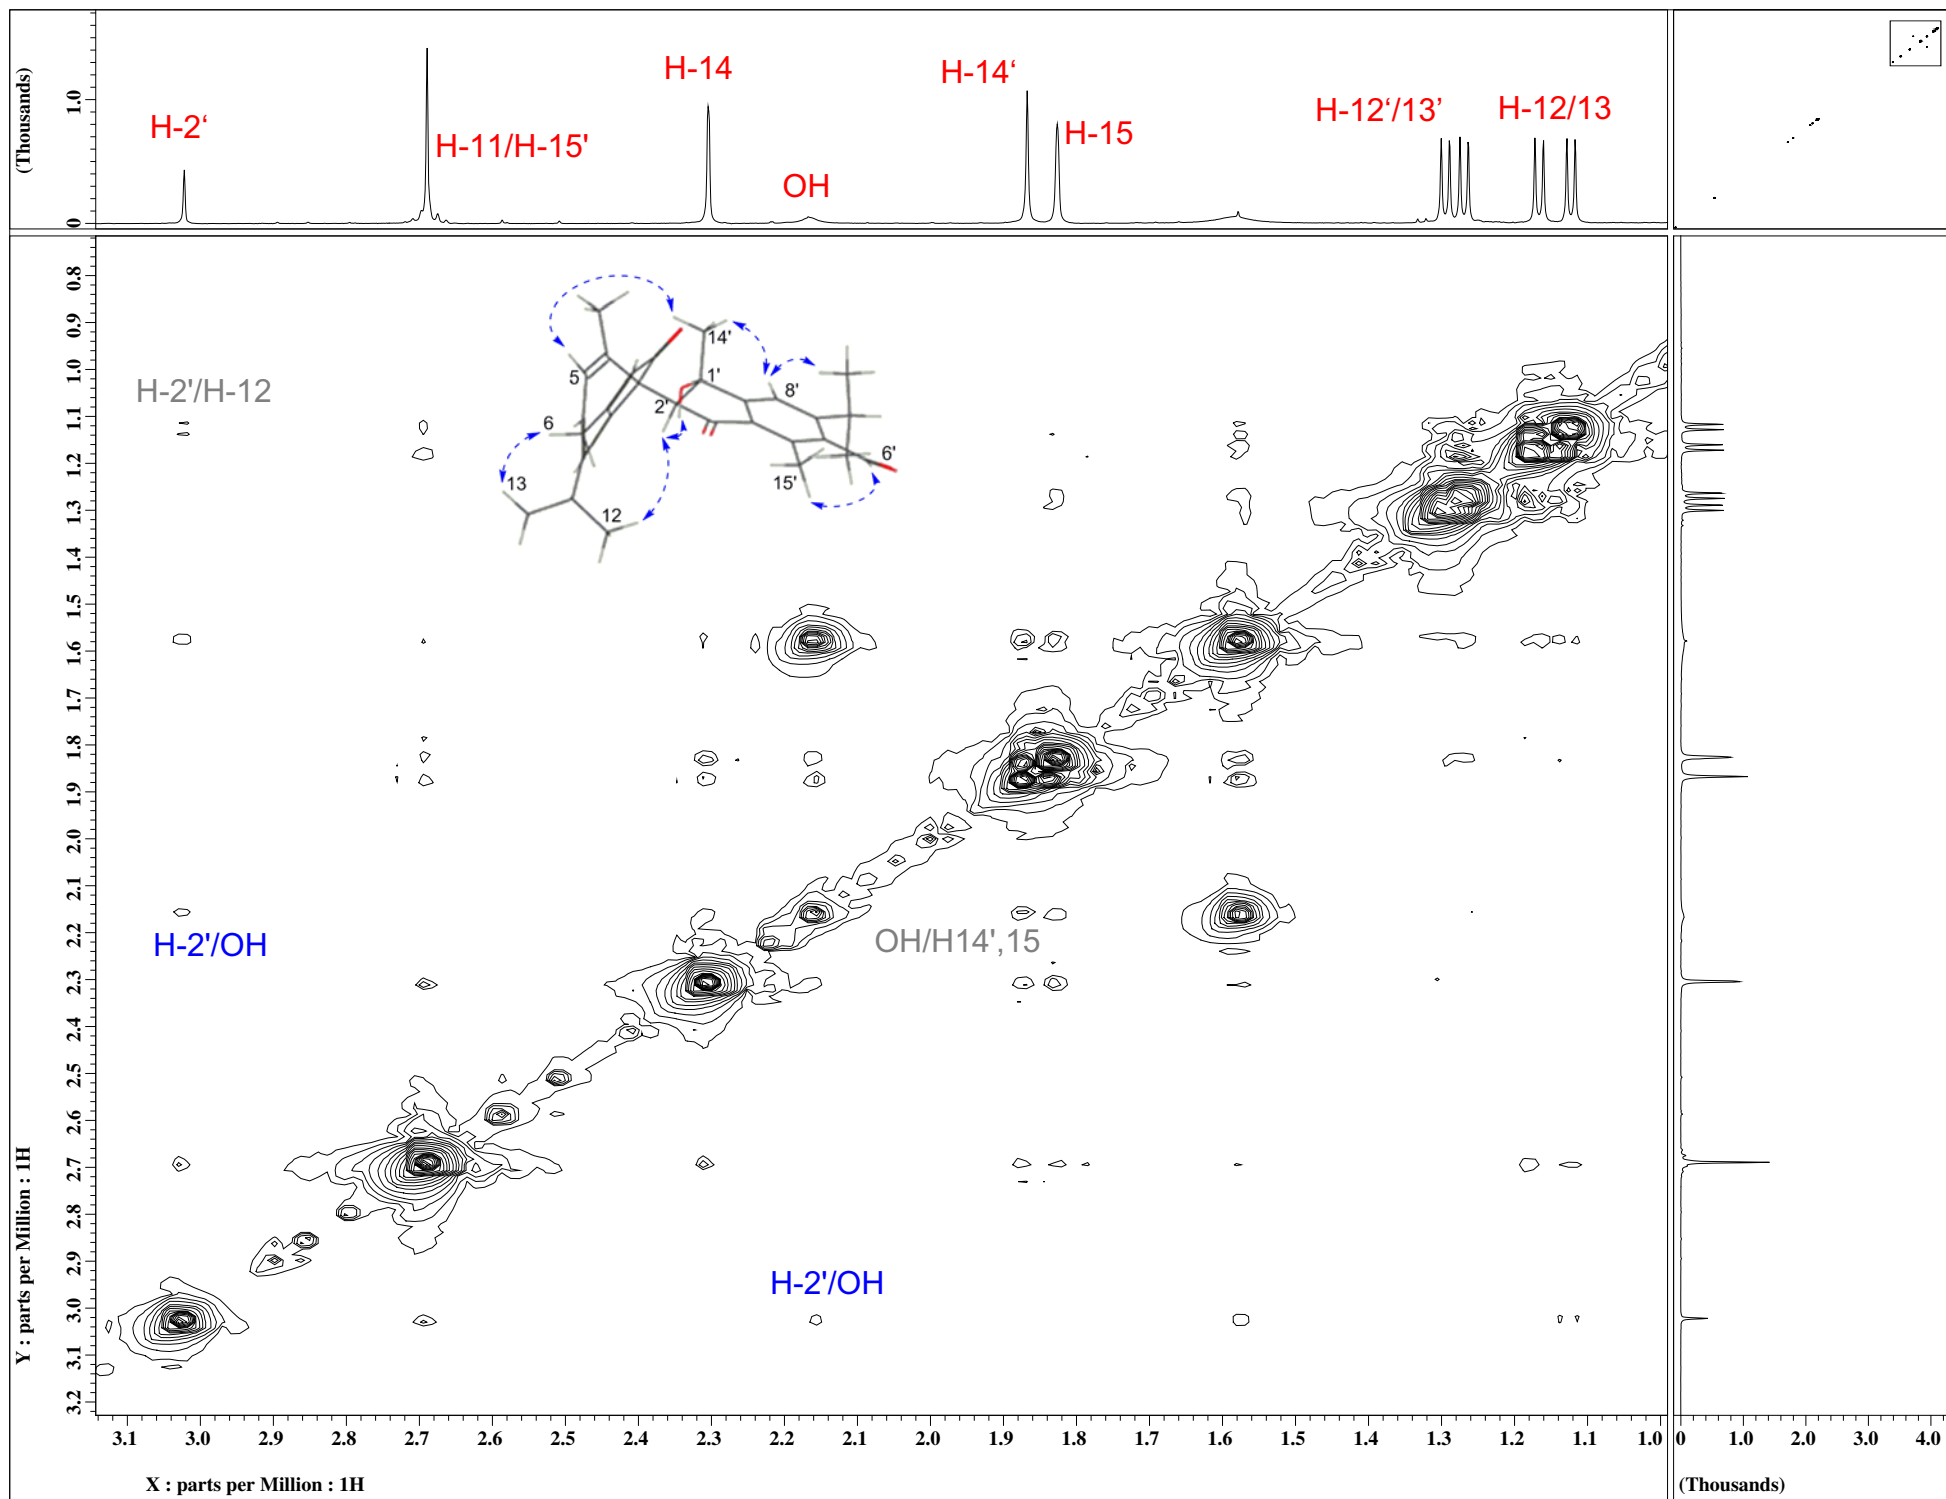

**SS44 The amplifactory NOESY spectrum of muriceidine C (4)**
